# Supplementary material for: Critical Phenomena of Charged AdS Black Holes in Rastall Gravity
Source: Hindawi journal article supplement (doi:10.1155/2020/4065254), 2020-01-24
Supplement: f1 [file 4065254.f1.zip]

Archive with 18 entries (18 files):
- Fig5(c)-PT.dat
- Fig2(b)-GT1.dat
- Fig2(b)-GT2.dat
- Fig2(b)-GT3.dat
- Fig2(c)-PT.dat
- Fig3(b)-GT1.dat
- Fig3(b)-GT2.dat
- Fig3(b)-GT3.dat
- Fig3(b)-GT4.dat
- Fig3(b)-GT5.dat
- Fig3(c)-GT.dat
- Fig4-PT1.dat
- Fig4-PT2.dat
- Fig5(b)-GT1.dat
- Fig5(b)-GT2.dat
- Fig5(b)-GT3.dat
- Fig5(b)-GT4.dat
- Fig5(b)-GT5.dat
