# Supplementary material for: Critical Phenomena of Charged AdS Black Holes in Rastall Gravity
Source: Hindawi journal article supplement (doi:10.1155/2020/4065254), 2020-01-24
Supplement: f1 [file 4065254.f1.zip › Fig2(b)-GT1.dat]

-787.8501484276675	0.7524984508414699
-95.51868837129553	0.3799932808291896
-26.841037964702423	0.25748300940614655
-10.4606109744911	0.19746600498837286
-4.786725954048358	0.16244059103317032
-2.3661948943080016	0.13990506875366662
-1.1880024039941415	0.12450058328938951
-0.5608671251304149	0.11354684249478303
-0.20538893673758757	0.10555402426358101
0.00529807727324046	0.0996275400260419
0.13408096132489666	0.09519747303293336
0.2143387973464822	0.09188329770305032
0.2647832921776063	0.08942103632925931
0.2963806694816722	0.08762163443046718
0.315797753543911	0.08634598602706176
0.32721310684259797	0.08548932448452752
0.3333133922580503	0.08497112250548204
0.3358633110421073	0.08472835881702936
0.3360427813426716	0.08471091118736604
0.33465234667961846	0.08487833155302739
0.33224156599433224	0.08519754255072486
0.32919110130749085	0.08564116227769877
0.32576626445745993	0.08618626607915886
0.32215257428525557	0.08681345789545858
0.31847974581403127	0.08750616449139835
0.31483810562750497	0.08825009256023308
0.3112899672855034	0.08903280647504971
0.30787760321303725	0.08984339652522035
0.30462888729956933	0.09067221579633668
0.3015613239722432	0.09151066967651099
0.29868494720614946	0.09235104610541923
0.2960044201394428	0.09318637765340271
0.2935205640712991	0.09401032867862227
0.2912314768093092	0.09481710239898884
0.28913335331219914	0.09560136389578976
0.28722108909155764	0.0963581759510741
0.28548872416947757	0.09708294529069719
0.28392976942247894	0.09777137731611388
0.28253744579665196	0.0984194378012305
0.28130485875152095	0.09902332033537181
0.2802251244238598	0.099579418531267
0.27929145973874936	0.10008430220384075
0.2784972455756799	0.100534696873359
0.2778360698015169	0.10092746606402106
0.2773017552828575	0.10125959596311972
0.2768883767261795	0.1015281820815257
0.27659026924937347	0.10173041761740285
0.276402030879077	0.10186358327474496
0.2763185206338823	0.10192503832888346
0.27633485344948194	0.10191221276437276
0.2764463928954577	0.10182260033804957
0.27664874240049364	0.10165375244270916
0.27693773552535483	0.10140327266564458
0.2773094256875662	0.10106881195196296
0.2777600756383052	0.10064806429569698
0.2782861469129795	0.10013876289272831
0.2788842894165756	0.09953867669880065
0.279551331258767	0.09884560734372475
0.2802842689186535	0.09805738635950874
0.2810802577923287	0.09717187268578277
0.28193660315629443	0.09618695042069127
0.282850751564572	0.09510052678953405
0.28382028268605075	0.09391053030695688
0.2848429015802714	0.0926149091115174
0.2859164314037915	0.09121162945405942
0.2870388065349796	0.08969867432357821
0.2882080661021295	0.08807404219620928
0.28942234789785964	0.0863357458946623
0.29067988266160627	0.0844818115468935
0.29197898871145606	0.08251027763408919
0.29331806690643375	0.0804191941191528
0.2946955959205496	0.07820662164786696
0.29611012781034013	0.07587063081575902
0.29756028385821753	0.07340930149445259
0.29904475067464875	0.07082072221195196
0.3005622765429481	0.06810298958189001
0.3021116679912807	0.06525420777728602
0.3036917865772977	0.06227248804481808
0.3053015458716507	0.059155948256019136
0.306939908627446	0.05590271249216347
0.30860588412348766	0.05251091065993149
0.3102985256699233	0.0489786781352248
0.31201692826563465	0.04530415543275501
0.3137602263974096	0.04148548789925882
0.31552759197158986	0.03752082542839197
0.31731823236951323	0.03340832219553633
0.31913138861864765	0.02914613641091865
0.32096633367186994	0.02473243008958123
0.3228223707878497	0.020165368836880276
0.3246988320059863	0.015443121648302971
0.32659507670978744	0.010563860722500401
0.32851049027300505	0.005525761286531372
0.330444482783227	0.0003270014323963899
0.3323964878379901	-0.005034238035978189
0.334365961408817	-0.010559773746078471
0.33635238076889273	-0.016251419891167823
0.3383552434803895	-0.02211098835632677
0.340374066437719	-0.02814028883676495
0.3424083849632444	-0.03434112894894803
0.34445775195221773	-0.040715314335047714
0.34652173706392675	-0.04726464876117342
0.34859992595623535	-0.05399093420981643
0.3506919195608927	-0.06089597096689775
0.3527973333971583	-0.06798155770378422
0.3549157969214519	-0.07524949155460886
0.3570469529108902	-0.08270156818920466
0.35919045687870976	-0.09033958188194069
0.3613459765197076	-0.09816532557672525
0.3635131911839508	-0.1061805909484223
0.36569179137711894	-0.11438716846091063
0.36788147828595025	-0.12278684742199741
0.3700819633273551	-0.13138141603538211
0.37229296771985776	-0.1401726614498544
0.3745142220761053	-0.14916236980589642
0.3767454660152658	-0.1583523262798473
0.37898644779421	-0.16774431512577587
0.38123692395643827	-0.17734011971520203
0.3834966589977795	-0.187141522574791
0.38576542504794775	-0.19715030542214174
0.38804300156709776	-0.20736824919978142
0.39032917505657305	-0.21779713410746782
0.3926237387830881	-0.2284387396328999
0.3949264925156307	-0.23929484458092254
0.3972372422744152	-0.25036722710131704
0.3995558000912543	-0.2616576647152497
0.401881983780755	-0.27316793434046005
0.4042156167217804	-0.2848998123152509
0.40655652764864775	-0.29685507442135434
0.4089045504515687	-0.3090354959057258
0.4112595239858607	-0.32144285150133184
0.4136212918894886	-0.3340789154469802
0.41598970240852073	-0.34694546150624533
0.41836460823010274	-0.3600442629855381
0.4207458663225819	-0.37337709275136
0.4231333377824268	-0.3869457232467903
0.42552688768761326	-0.4007519265072415
0.4279263849571631	-0.41479747417552065
0.4303317022165369	-0.4290841375162351
0.43274271566860395	-0.4436136874295715
0.43515930496992156	-0.4583878944644832
0.4375813531120728	-0.4734085288313124
0.44000874630782666	-0.48867736041387594
0.4424413738818942	-0.5041961587810452
0.44487912816606656	-0.5199666931978355
0.4473219043985351	-0.5359907326360377
0.4497696006271992	-0.5522700457844107
0.4522221176167824	-0.5688064010584546
0.45467935875958243	-0.5856015666097845
0.457141229989693	-0.6026573103351276
0.4596076397005403	-0.6199753998849555
0.46207849866558937	-0.6375576026717729
0.4645537199620766	-0.6554056858780772
0.4670332188976389	-0.6735214164640031
0.4695169129397097	-0.6919065611746686
0.4720047216475647	-0.7105628865472353
0.47449656660689965	-0.7294921589176917
0.4769923713668344	-0.7486961444273816
0.47949206137923733	-0.7681766090292779
0.4819955639402726	-0.7879353184940198
0.484502808134077	-0.8079740384157226
0.4870137247784753	-0.8282945342175692
0.4895282463726511	-0.8488985711571919
0.49204630704668934	-0.8697879143318551
0.4945678425129167	-0.8909643286834495
0.4970927900189626	-0.912429579003299
0.4996210883024732	-0.9341854299367951
0.5021526775474094	-0.9562336459878638
0.5046874993418659	-0.9785759915232706
0.5072254966373511	-1.001214230776772
0.5097666137094671	-1.024150127853118
0.5123107961199359	-1.0473854467319148
0.5148579906799188	-1.0709219512713517
0.5174081454145777	-1.0947614052117949
0.519961209528829	-1.1189055721792587
0.522517133374245	-1.1433562156887573
0.525075868417058	-1.1681150991475384
0.5276373672072241	-1.1931839858582096
0.5302015833485079	-1.2185646390217526
0.5327684714695456	-1.2442588217404444
0.5353379871958553	-1.2702682970206736
0.5379100871227511	-1.2965948277756603
0.5404847287891358	-1.323240176828095
0.5430618706521319	-1.3502061069126798
0.5456414720625236	-1.3774943806785918
0.5482234932409813	-1.4051067606918652
0.5508078952550339	-1.4330450094376916
0.553394639996769	-1.4613108893226525
0.5559836901612296	-1.4899061626768741
0.5585750092254831	-1.5188325917561152
0.5611685614283395	-1.5480919387437881
0.5637643117506942	-1.5776859657529165
0.5663622258964749	-1.6076164348280269
0.5689622702741691	-1.6378851079469867
0.5715644119789126	-1.6684937470227847
0.5741686187751205	-1.699444113905246
0.5767748590796389	-1.730737970382707
0.5793831019454028	-1.7623770781836305
0.5819933170455799	-1.7943631989781745
0.5846054746581834	-1.8266980943797124
0.5872195456511407	-1.859383525946304
0.5898355014677997	-1.8924212551821287
0.5924533141128583	-1.9258130435388712
0.5950729561387035	-1.9595606524170592
0.5976944006321456	-1.9936658431673808
0.6003176212015352	-2.0281303770919363
0.6029425919642498	-2.0629560154454745
0.6055692875345368	-2.098144519436589
0.6081976830117013	-2.1336976502288616
0.6108277539686319	-2.169617168942002
0.6134594764406434	-2.2059048366529233
0.6160928269146377	-2.2425624143968186
0.6187277823185638	-2.2795916631681705
0.6213643200111724	-2.3169943439217713
0.6240024177720521	-2.354772217573675
0.6266420537919414	-2.392927045002156
0.6292832066633051	-2.431460587048613
0.6319258553711686	-2.470374604518476
0.6345699792841999	-2.509670858182052
0.6372155581460349	-2.5493511087753884
0.639862572066833	-2.589417117001073
0.6425110015150624	-2.6298706435290473
0.6451608273095025	-2.670713448997362
0.64781203061146	-2.7119472940129494
0.6504645929171893	-2.7535739391523384
0.6531184960505145	-2.7955951449623795
0.6557737221556441	-2.83801267196093
0.6584302536901732	-2.8808282806375356
0.6610880734182668	-2.924043731454078
0.6637471644040229	-2.9676607848454246
0.6664075100050025	-3.011681201220037
0.6690690938659289	-3.056106740960593
0.6717318999125464	-3.1009391644245587
0.674395912345637	-3.146180231944772
0.6770611156351867	-3.191831703830011
0.6797274945147008	-3.2378953403655095
0.6823950339756627	-3.2843729018135197
0.6850637192621288	-3.3312661484138055
0.6877335358654614	-3.3785768403841603
0.69040446951919	-3.4263067379208847
0.6930765061940025	-3.474457601199279
0.6957496320928558	-3.5230311903740903
0.6984238336462112	-3.572029265579986
0.7010990975073822	-3.621453586931981
0.7037754105479984	-3.671305914525875
0.7064527598535776	-3.72158800843867
0.7091311327192066	-3.7723016287289886
0.7118105166453234	-3.823448535437458
0.714490899333604	-3.8750304885871185
0.7171722686829439	-3.927049248183783
0.7198546127855383	-3.979506574216429
0.7225379199230516	-4.03240422665754
0.7252221785628816	-4.085743965463481
0.727907377354508	-4.139527550574809
0.7305935051259277	-4.193756741916652
0.7332805508801737	-4.248433299398998
0.7359685037919149	-4.303558982917042
0.7386573532041328	-4.359135552351475
0.7413470886248779	-4.41516476756881
0.7440376997240981	-4.471648388421671
0.7467291763305404	-4.528588174749076
0.7494215084287248	-4.58598588637673
0.7521146861559839	-4.643843283117299
0.7548086997995729	-4.702162124770679
0.7575035397938418	-4.760944171124262
0.7601991967174737	-4.820191181953193
0.762895661290783	-4.8799049170206175
0.7655929243730749	-4.940087136077942
0.7682909769600632	-5.000739598865048
0.7709898101813457	-5.061864065110556
0.7736894152979344	-5.123462294532034
0.7763897836998418	-5.185536046836237
0.7790909069037171	-5.248087081719303
0.7817927765505375	-5.311117158867
0.7844953844033472	-5.374628037954904
0.7871987223450465	-5.438621478648624
0.789902782376228	-5.503099240603988
0.7926075566130604	-5.568063083467251
0.7953130372852156	-5.633514766875277
0.7980192167338443	-5.69945605045573
0.8007260874095887	-5.765888693827252
0.8034336418706428	-5.832814456599653
0.8061418727808508	-5.900235098374062
0.808850772907846	-5.968152378743128
0.8115603351212305	-6.0365680572911735
0.8142705523907894	-6.105483893594341
0.8169814177847462	-6.174901647220782
0.8196929244680522	-6.244823077730793
0.8224050657007119	-6.315249944676982
0.8251178348361429	-6.3861840076044
0.8278312253195692	-6.457627026050716
0.8305452306864484	-6.529580759546323
0.8332598445609307	-6.602046967614518
0.835975060654348	-6.6750274097716025
0.8386908727637361	-6.748523845527049
0.8414072747703841	-6.822538034383602
0.8441242606384157	-6.897071735837438
0.8468418244133966	-6.972126709378263
0.8495599602209722	-7.047704714489457
0.8522786622655296	-7.123807510648179
0.8549979248288897	-7.200436857325499
0.8577177422690216	-7.277594513986498
0.8604381090187864	-7.355282240090405
0.863159019584701	-7.433501795090678
0.8658804685457312	-7.512254938435141
0.8686024505521045	-7.591543429566061
0.8713249603241484	-7.671369027920293
0.8740479926511502	-7.751733492929333
0.8767715423902395	-7.832638584019465
0.8794956044652913	-7.91408606061182
0.8822201738658519	-7.996077682122495
0.8849452456460848	-8.078615207962647
0.8876708149237347	-8.16170039753857
0.8903968768791154	-8.245335010251807
0.8931234267541126	-8.32952080549921
0.8958504598512095	-8.414259542673058
0.8985779715325277	-8.499552981161113
0.9013059572188885	-8.585402880346733
0.9040344123888897	-8.671810999608917
0.9067633325780021	-8.758779098322435
0.9094927133776806	-8.846308935857845
0.9122225504344935	-8.93440227158163
0.9149528394492672	-9.023060864856225
0.9176835761762472	-9.112286475040127
0.9204147564222733	-9.202080861487936
0.9231463760459726	-9.292445783550459
0.9258784309569638	-9.383383000574753
0.9286109171150793	-9.4748942719042
0.9313438305295996	-9.56698135687858
0.9340771672585022	-9.659646014834145
0.9368109234077239	-9.752890005103652
0.9395450951304367	-9.846715087016463
0.9422796786263362	-9.941123019898573
0.9450146701409448	-10.03611556307271
0.9477500659649232	-10.131694475858357
0.9504858624333988	-10.227861517571819
0.9532220559253038	-10.32461844752631
0.9559586428627246	-10.421967025031968
0.9586956197102631	-10.519909009395944
0.9614329829744115	-10.618446159922419
0.9641707292029339	-10.717580235912704
0.9669088549842625	-10.817312996665246
0.9696473569469027	-10.917646201475716
0.9723862317588482	-11.018581609637033
0.9751254761270078	-11.120120980439438
0.9778650867966403	-11.222266073170502
0.9806050605508008	-11.32501864711524
0.9833453942097955	-11.42838046155607
0.9860860846306461	-11.532353275772946
0.9888271287065643	-11.636938849043341
0.9915685233664335	-11.742138940642324
0.994310265574301	-11.847955309842575
0.9970523523288783	-11.954389715914473
0.9997947806630488	-12.061443918126086
1.0025375476433864	-12.169119675743245
1.005280650369679	-12.277418748029563
1.0080240859744627	-12.386342894246509
1.0107678516225629	-12.495893873653394
1.013511944510641	-12.606073445507471
1.016256361866754	-12.716883369063913
1.0190011009499145	-12.828325403575885
1.0217461590496641	-12.940401308294586
1.0244915334856497	-13.053112842469249
1.0272372216072094	-13.166461765347206
1.0299832207929636	-13.280449836173908
1.0327295284504137	-13.395078814192978
1.0354761420155467	-13.510350458646212
1.0382230589524468	-13.626266528773638
1.0409702767529136	-13.74282878381353
1.0437177929360864	-13.860038983002466
1.0464656050480714	-13.977898885575305
1.0492137106615824	-14.096410250765304
1.0519621073755783	-14.215574837804041
1.0547107928149138	-14.335394405921546
1.0574597646299908	-14.45587071434624
1.0602090204964187	-14.57700552230504
1.0629585581146772	-14.698800589023326
1.065708375209787	-14.821257673725022
1.0684584695309836	-14.944378535632566
1.0712088388513996	-15.06816493396698
1.0739594809677466	-15.192618627947882
1.0767103937000075	-15.317741376793501
1.07946157489113	-15.443534939720715
1.0822130224067275	-15.570001075945072
1.0849647341347823	-15.697141544680811
1.0877167079853558	-15.824958105140887
1.0904689418902997	-15.953452516537
1.0932214338029764	-16.0826265380796
1.09597418169798	-16.212481928977947
1.098727183570863	-16.343020448440065
1.1014804374378675	-16.47424385567285
1.1042339413356586	-16.60615390988201
1.1069876933210656	-16.738752370272167
1.1097416914708227	-16.87204099604678
1.1124959338813176	-17.00602154640827
1.1152504186683412	-17.14069578055796
1.118005143966842	-17.27606545769612
1.120760107930684	-17.412132337022012
1.1235153087324106	-17.548898177733868
1.1262707445630065	-17.686364739028928
1.1290264136316701	-17.82453378010347
