# Supplementary material for: Critical Phenomena of Charged AdS Black Holes in Rastall Gravity
Source: Hindawi journal article supplement (doi:10.1155/2020/4065254), 2020-01-24
Supplement: f1 [file 4065254.f1.zip › Fig2(b)-GT2.dat]

-787.8464715985983	0.7524980658048303
-95.51133471315717	0.37999020053607163
-26.830007477494892	0.25747261341687355
-10.44590365821439	0.19744136264342943
-4.768341808702468	0.16239246145320269
-2.344133919892933	0.1398219008394825
-1.162264600509895	0.12436851572195828
-0.5314524925769903	0.11334970373523555
-0.17229747511498497	0.1052733325532097
0.0420663679650211	0.09924250338630072
0.17452608108585538	0.09468498926543786
0.25846074617661896	0.09121795438957757
0.3125820700769211	0.08857511083174795
0.3478562764501651	0.0865650938910174
0.370950189581582	0.0850464873679353
0.386042371949447	0.08391221440814768
0.3958194864340774	0.08307943749443365
0.40204623428731245	0.08248282513405884
0.40590253365705486	0.08206994487538133
0.40818892806317975	0.08179803843509799
0.40945497644707163	0.08163171823008185
0.4100813408294083	0.08154129213773476
0.41033333304855546	0.081501525283428
0.41039647194552914	0.08149071138767659
0.4104004725434829	0.0814899669954425
0.41043566142613463	0.08148268858014221
0.4105643521533111	0.0814541302950242
0.41082881715002306	0.08139107220962209
0.4112569303057332	0.08128155718968919
0.4118661960475851	0.0811146804034993
0.41266664835066946	0.08088041957088993
0.4136629503531408	0.08056949704236392
0.4148559233541752	0.08017326695624372
0.41624366516136346	0.07968362231060175
0.4178223707334314	0.07909291796688693
0.4195869355819679	0.07839390648730989
0.42153139972906595	0.07757968437788751
0.4236492740512454	0.0766436468202362
0.42593377949459654	0.07557944936842381
0.42837802151864357	0.07438097539193667
0.43097511626016044	0.07304230828366556
0.4337182806442281	0.07155770763869668
0.43660089555033677	0.06992158875745749
0.43961654884535173	0.0681285049443089
0.44275906339587046	0.06617313216670526
0.44602251390837055	0.06405025571567878
0.4494012355007425	0.06175475856955494
0.45288982619962415	0.05928161121248905
0.4564831450236075	0.05662586269997409
0.4601763069083852	0.05378263279672604
0.46396467542353903	0.05074710503974314
0.46784385399775297	0.04751452060198219
0.4718096761917923	0.04408017285089784
0.47585819542318175	0.04043940251175876
0.4799856744430988	0.03658759335875916
0.4841885747869511	0.03252016836794229
0.48846354635972533	0.02823258627521341
0.4928074172710948	0.023720338490544807
0.49721718400015935	0.018978946326106222
0.5016900019430126	0.014003958501689229
0.5062231763761564	0.00879094889559992
0.510814153853612	0.003335514513299581
0.515460514044269	-0.0023667263504043856
0.5201599620076676	-0.008320135776792859
0.5249103209003658	-0.014529057734860462
0.5297095251007319	-0.02099781945545029
0.5345556137370598	-0.02773073268226539
0.5394467246019681	-0.0347320948124345
0.5443810884348929	-0.04200618993783978
0.5493570235539207	-0.049557289797133475
0.5543729308180764	-0.057389654647250515
0.5594272889013703	-0.06550753406224663
0.5645186498603388	-0.07391516766643311
0.5696456349773943	-0.08261678580802484
0.5748069308630035	-0.09161661017885578
0.580001285800481	-0.10091885438513148
0.5852275063179917	-0.11052772447367129
0.5904844539731867	-0.12044741941763545
0.595771042336718	-0.13068213156532948
0.6010862341616912	-0.1412360470553176
0.6064290387269109	-0.15211334620075767
0.6117985093425247	-0.16331820384558673
0.6171937410074142	-0.17485478969493162
0.6226138682083671	-0.18672726862189382
0.6280580628517254	-0.19893980095265634
0.6335255323188269	-0.21149654273167567
0.6390155176371394	-0.22440164596856352
0.6445272917595396	-0.23765925886811604
0.6500601579446975	-0.25127352604481534
0.6556134482320122	-0.2652485887230127
0.6611865220049913	-0.2795885849238958
0.6667787646373872	-0.2942976496402439
0.672389586216787	-0.3093799149998949
0.6780184203407282	-0.32483951041876147
0.6836647229807331	-0.34068056274416736
0.689327971409987	-0.356907196389215
0.6950076631906618	-0.37352353345882305
0.7007033152171693	-0.3905336938680399
0.7064144628118728	-0.4079417954531692
0.7121406588700242	-0.4257519540762215
0.7178814730509112	-0.44396828372314445
0.723636491012398	-0.46259489659626796
0.7294053136862334	-0.48163590320135136
0.735187556591677	-0.5010954124296001
0.7409828491851487	-0.5209775316349852
0.7467908342437651	-0.5412863667071786
0.7526111672807627	-0.5620260221403874
0.7584435159909386	-0.5832006010983588
0.7642875597243599	-0.6048142054757949
0.7701429889867062	-0.6268709359564131
0.7760095049647154	-0.6493748920678587
0.7818868190752983	-0.6723301722336703
0.7877746525369792	-0.6957408738224751
0.7936727359624047	-0.7196110931945943
0.7995808089707432	-0.743944925746205
0.8054986198188655	-0.7687464659512153
0.8114259250502718	-0.7940198074009828
0.8173624891607912	-0.8197690428420111
0.8233080842801375	-0.8459982642117383
0.8292624898684655	-0.8727115626725297
0.835225492427119	-0.8999130286439816
0.8411968852228121	-0.9276067518336306
0.8471764680245326	-0.9557968212661612
0.8531640468524953	-0.9844873253111928
0.8591594337385124	-1.0136823517097298
0.8651624464971913	-1.04338598759935
0.8711729085073946	-1.0736023195381954
0.87719064850344	-1.1043354335278364
0.8832155003755391	-1.1355894150350663
0.8892473029790091	-1.167368349012691
0.8952858999518152	-1.1996763199193556
0.9013311395400252	-1.2325174117384734
0.9073828744307854	-1.265895707996294
0.9134409615924427	-1.2998152917791574
0.9195052621214655	-1.3342802457499812
0.92557564109583	-1.369294652164016
0.9316519674345579	-1.4048625928839074
0.93773411376311	-1.4409881493941015
0.9438219562843552	-1.4776754028146233
0.9499153746548507	-1.5149284339142646
0.9560142518661799	-1.5527513231232057
0.9621184741311117	-1.591148150545102
0.9682279307743575	-1.6301229959686636
0.974342514127708	-1.6696799388787442
0.9804621194293546	-1.7098230584669736
0.9865866447271967	-1.750556433641948
0.9927159907859578	-1.7918841430390064
0.9988500609979359	-1.8338102650296038
1.0049887612972246	-1.8763388777303036
1.01113200007725	-1.9194740590114174
1.0172796881114772	-1.9632198865052868
1.0234317384771425	-2.007580437614249
1.0295880664818828	-2.052559789518277
1.0357485895931318	-2.098162019182327
1.0419132273701646	-2.1443912033633987
1.0480819013986777	-2.1912514186173198
1.0542545352277906	-2.238746741305272
1.0604310543093716	-2.286881247600067
1.066611385939585	-2.3356590134921817
1.0727954592025675	-2.3850841147955713
1.0789832049161439	-2.4351606271532544
1.0851745555794976	-2.485892626042705
1.0913694453227138	-2.5372841867810245
1.0975678098581194	-2.589339384529942
1.1037695864333434	-2.6420622943006196
1.109974713786032	-2.695456990958288
1.116183132100146	-2.749527549226711
1.1223947829637806	-2.8042780436924915
1.1286096093284441	-2.859712548809227
1.134827555469738	-2.9158351389015045
1.141048566949385	-2.972649888168769
1.1472725905785461	-3.030160870689048
1.1534995743823828	-3.0883721604225465
1.1597294675658123	-3.147287831215116
1.1659622204804063	-3.2069119568016107
1.1721977845923972	-3.2672486108091165
1.1784361124517417	-3.3283018667600777
1.1846771576622035	-3.3900757980753173
1.1909208748524194	-3.452574478076948
1.197167219647907	-3.515801979991199
1.2034161486439807	-3.5797623769511278
1.2096676193795437	-3.6444597419992646
1.2159215903117178	-3.709898148090147
1.2221780207912878	-3.776081668092794
1.2284368710389235	-3.843014374793076
1.234698102122154	-3.910700340896022
1.2409616759330673	-3.979143639028056
1.247227555166706	-4.048348341739141
1.2534957033001373	-4.11831852150487
1.2597660845721719	-4.1890582507284995
1.2660386639637047	-4.260571601742889
1.2723134071786635	-4.332862646812404
1.2785902806255356	-4.40593545813475
1.284869251399457	-4.479794107842755
1.291150287264843	-4.554442668006081
1.2974333566385394	-4.6298852106329065
1.3037184285734817	-4.706125807671527
1.3100054727428367	-4.783168531011944
1.3162944594246182	-4.861017452487367
1.3225853594867536	-4.9396766438756945
1.3288781443725906	-5.0191501769009434
1.3351727860868274	-5.099442123234639
1.3414692571818505	-5.180556554497146
1.347767530744471	-5.262497542258993
1.3540675803830384	-5.345269158042115
1.360369380214931	-5.428875473321102
1.366672904854396	-5.513320559524386
1.3729781294007388	-5.598608488035385
1.3792850294268475	-5.684743330193651
1.385593580968037	-5.771729157295932
1.3919037605112095	-5.859570040597262
1.3982155449843134	-5.948270051311959
1.4045289117461002	-6.037833260614658
1.4108438385761577	-6.1282637396412465
1.4171603036652254	-6.219565559489843
1.4234782856057668	-6.31174279122168
1.4297977633828087	-6.404799505862029
1.4361187163650182	-6.498739774401031
1.442441124296031	-6.593567667794577
1.448764967286007	-6.68928725696509
1.4550902258034146	-6.785902612802352
1.461416880667033	-6.883417806164251
1.4677449130381683	-6.981836907877559
1.4740743044130755	-7.0811639887386395
1.4804050366155792	-7.1814031195141865
1.4867370917898868	-7.282558370941892
1.4930704523935938	-7.384633813731146
1.4994051011908656	-7.48763351856366
1.5057410212457996	-7.5915615560941445
1.5120781959159575	-7.696421996950897
1.518416608846062	-7.802218911736441
1.5247562439618574	-7.908956371028072
1.531097085464126	-8.016638445378469
1.5374391178228537	-8.125269205316256
1.543782325771546	-8.234852721346494
1.5501266943016863	-8.345393063951281
1.5564722086573302	-8.456894303590216
1.5628188543298407	-8.569360510700934
1.5691666170527474	-8.682795755699567
1.575515482796738	-8.797204108981266
1.5818654377647694	-8.912589640920604
1.5882164683873028	-9.028956421872097
1.5945685613176517	-9.146308522170584
1.6009217034274463	-9.264650012131721
1.6072758818022035	-9.383984962052338
1.6136310837370105	-9.504317442210898
1.6199872967323052	-9.625651522867866
1.6263445084897639	-9.747991274266125
1.6327027069082822	-9.871340766631315
1.6390618800800545	-9.99570407017227
1.6454220162867457	-10.121085255081296
1.651783103995754	-10.247488391534601
1.658145131856558	-10.374917549692585
1.6645080886971562	-10.503376799700208
1.6708719635205802	-10.632870211687303
1.6772367455014994	-10.7634018557689
1.6836024239828955	-10.894975802045522
1.6899689884728186	-11.027596120603532
1.6963364286412168	-11.161266881515388
1.702704734316837	-11.295992154839944
1.7090738954841995	-11.431776010622746
1.715443902280637	-11.568622518896298
1.721814744993404	-11.706535749680334
1.7281864140568506	-11.845519772982081
1.7345589000496608	-11.985578658796532
1.740932193692148	-12.126716477106662
1.7473062858436181	-12.26893729788372
1.7536811674997845	-12.41224519108742
1.760056829790245	-12.556644226666235
1.7664332639760119	-12.702138474557554
1.7728104614470972	-12.848732004687983
1.7791884137201506	-12.996428886973495
1.785567112436149	-13.145233191319695
1.791946549358137	-13.295148987621992
1.7983267163690144	-13.446180345765848
1.8047076054693738	-13.598331335626913
1.8110892087753843	-13.751606027071299
1.8174715185167176	-13.906008489955687
1.8238545270345246	-14.061542794127599
1.8302382267794466	-14.218213009425497
1.8366226103096792	-14.376023205679045
1.843007670289065	-14.534977452709203
1.849393399485238	-14.695079820328457
1.8557797907678006	-14.856334378340982
1.8621668371065376	-15.018745196542739
1.868554531569673	-15.182316344721729
1.8749428673221569	-15.347051892658088
1.8813318376239947	-15.512955910124251
1.8877214358286036	-15.680032466885123
1.894111655381208	-15.848285632698202
1.900502489817265	-16.01771947731372
1.9068939327609258	-16.188338070474813
1.913285977923521	-16.360145481917627
1.9196786191020871	-16.533145781371466
1.926071850177913	-16.707343038558918
1.9324656651151226	-16.882741323195994
1.9388600579592816	-17.059344704992235
1.9452550228360355	-17.237157253650867
1.951650553949771	-17.416183038868883
1.958046645582309	-17.596426130337196
1.9644432920916193	-17.77789059774071
1.970840487910562	-17.96058051075852
1.9772382275456546	-18.1444999390639
1.983636505575863	-18.329652952324516
1.9900353166514142	-18.516043620202485
1.9964346554926364	-18.703676012354485
2.002834516888816	-18.89255419843186
2.0092348956970834	-19.082682248080733
2.015635786841313	-19.274064230942063
2.022037185311052	-19.4667042166518
2.028439086160463	-19.660606274840934
2.0348414845072913	-19.855774475135593
2.0412443755318495	-20.052212887157168
2.0476477544760248	-20.249925580522326
2.0540516166423	-20.448916624843218
2.0604559573927963	-20.64919008972742
2.066860772148335	-20.85075004477814
2.0732660563875145	-21.053600559594205
2.0796718056458046	-21.25774570377024
2.0860780155146608	-21.463189546896626
2.092484681640652	-21.669936158559693
2.098891799724604	-21.877989608341707
2.105299365520762	-22.087353965821013
2.1117073748359663	-22.298033300572037
2.1181158235288433	-22.510031682165437
2.124524707509013	-22.723353180168104
2.130934022736307	-22.938001864143256
2.137343765220005	-23.153981803650513
2.1437539310180855	-23.371297068245973
2.1501645162364853	-23.589951727482212
2.1565755170283762	-23.809949850908453
2.162986929593454	-24.031295508070514
2.1693987501772405	-24.253992768510965
2.1758109750703967	-24.478045701769123
2.18222360060805	-24.70345837738115
2.1886366231691334	-24.93023486488008
2.195050039175732	-25.1583792337959
2.201463845092449	-25.387895553655582
2.2078780374257754	-25.618787893983168
2.214292612723476	-25.851060324299795
2.2207075675739825	-26.084716914123756
2.227122898605801	-26.319761732970548
2.2335386024869246	-26.556198850352942
2.2399546759242623	-26.794032335781004
2.246371115663073	-27.033266258762154
2.252787918486411	-27.273904688801252
2.2592050812145836	-27.51595169540053
2.2656226007046127	-27.759411348059807
2.272040473849709	-28.00428771627637
2.278458697578756	-28.25058486954515
2.2848772688558014	-28.498306877358655
2.291296184679557	-28.7474578092071
2.297715442082906	-28.998041734578383
2.3041350381324217	-29.25006272295819
2.310554969927892	-29.503524843829968
2.3169752346018537	-29.758432166675025
2.3233958293191317	-30.014788760972507
2.3298167512763883	-30.2725986961995
2.336237997701679	-30.531866041831027
2.3426595658540177	-30.792594867340082
2.349081453022946	-31.05478924219772
2.355503656528109	-31.318453235872983
2.361926173718847	-31.58359091783308
2.368349001973779	-31.850206357543254
2.3747721387004073	-32.11830362446701
2.3811955813347185	-32.38788678806595
2.3876193273407966	-32.658959917799955
2.3940433742104417	-32.931527083127136
2.4004677194627924	-33.20559235350391
2.4068923606439556	-33.48115979838498
2.4133172953266446	-33.75823348722343
2.4197425211098187	-34.036817489470685
2.426168035618332	-34.31691587457661
2.432593836502587	-34.598532711989456
2.4390199214381934	-34.88167207115599
2.4454462881256296	-35.16633802152144
2.4518729342899173	-35.45253463252955
2.458299857680292	-35.7402659736226
2.464727056069886	-36.02953611424146
2.471154527255411	-36.32034912382557
2.4775822690568505	-36.612709071813015
2.484010279317151	-36.90662002764049
2.4904385559019264	-37.202086060743405
2.4968670966991593	-37.49911124055583
2.5032958996189105	-37.79769963651055
2.5097249625930327	-38.09785531803911
2.5161542835748874	-38.3995823545718
2.522583860539069	-38.702884815537715
2.52901369148113	-39.007766770364704
2.5354437744173124	-39.31423228847953
2.5418741073842823	-39.62228543930773
2.548304688438867	-39.93193029227376
2.5547355156578027	-40.24317091680091
2.561166587137475	-40.556011382311446
2.5675979009936767	-40.87045575822652
2.5740294553613556	-41.186508113966276
2.580461248394376	-41.504172518949765
2.5868932782652805	-41.823453042595105
2.593325543165054	-42.14435375431934
2.5997580413028962	-42.46687872353859
