# Supplementary material for: Critical Phenomena of Charged AdS Black Holes in Rastall Gravity
Source: Hindawi journal article supplement (doi:10.1155/2020/4065254), 2020-01-24
Supplement: f1 [file 4065254.f1.zip › Fig2(b)-GT3.dat]

-787.8431484276674	0.7524977178031841
-95.50468837129553	0.3799874165229029
-26.820037964702426	0.25746321737242894
-10.432610974491102	0.19741909053807924
-4.751725954048358	0.16234896124744064
-2.3241948943080013	0.1397467324839257
-1.1390024039941415	0.1242491511573472
-0.5048671251304149	0.11317152689243418
-0.1423889367375875	0.10501963935320538
0.07529807727324049	0.09889450174020428
0.21108096132489673	0.09422179907448348
0.2983387973464823	0.09061660754512291
0.35578329217760635	0.08781055121527406
0.3943806694816723	0.08561017737412875
0.420797753543911	0.08387198181235979
0.43921310684259807	0.08248679966573663
0.45231339225805034	0.0813697054071618
0.46186331104210737	0.08045327953402437
0.46904278134267174	0.0796830015848058
0.47465234667961853	0.07901402526632642
0.4792415659943324	0.07840887498558266
0.483191101307491	0.0778357706100998
0.4867662644574601	0.07726738925537253
0.4901525742852557	0.07667993663203933
0.49347974581403137	0.07605244127518554
0.4968381056275051	0.07536621164835108
0.5002899672855035	0.07460441389490785
0.5038776032130374	0.07375174007451292
0.5076288872995696	0.07279414504304296
0.5115613239722433	0.07171863595889527
0.5156849472061495	0.07051310253203072
0.5200044201394429	0.06916617910307558
0.5245205640712992	0.06766713180047573
0.5292314768093094	0.06600576561242705
0.5341333533121994	0.06417234739050183
0.5392210890915577	0.062157541687034114
0.5444887241694778	0.05995235699816426
0.5499297694224792	0.05754810049563202
0.5555374457966522	0.054936339723628755
0.5613048587515211	0.05210887004176415
0.56722512442386	0.04905768683305245
0.5732914597387496	0.0457749616827032
0.57949724557568	0.042253021881267394
0.5858360698015171	0.038484332723229306
0.5923017552828578	0.03446148216616664
0.5988883767261798	0.030177167491235155
0.6055902692493736	0.025624183666883668
0.6124020308790772	0.02079541316739092
0.6193185206338825	0.015683817038373377
0.6263348534494821	0.010282427034670333
0.6334463928954579	0.004584338683403549
0.6406487424004939	-0.0014172948523468454
0.6479377355253552	-0.007729268215002721
0.6553094256875664	-0.014358328689171973
0.6627600756383054	-0.021311180510536987
0.6702861469129797	-0.028594488712931077
0.6778842894165759	-0.036214882570325624
0.6855513312587673	-0.04417895868262492
0.6932842689186538	-0.0524932837475357
0.701080257792329	-0.06116439705514298
0.7089366031562947	-0.07019881273701739
0.7168507515645723	-0.07960302179757411
0.724820282686051	-0.08938349395188239
0.7328429015802718	-0.09954667929109953
0.7409164314037919	-0.11009900979409679
0.7490388065349799	-0.12104690070159405
0.7572080661021298	-0.1323967517671707
0.76542234789786	-0.14415494839783216
0.7736798826616066	-0.15632786269533708
0.7819789887114564	-0.16892185440821425
0.790318066906434	-0.18194327180327546
0.79869559592055	-0.19539845246445275
0.8071101278103405	-0.20929372402593413
0.8155602838582178	-0.2236354048458109
0.8240447506746491	-0.2384298046257937
0.8325622765429485	-0.2536832249819648
0.841111667991281	-0.2694019599710198
0.849691786577298	-0.28559229657599594
0.8583015458716512	-0.302260515155075
0.8669399086274463	-0.3194128898566978
0.8756058841234879	-0.33705568900389893
0.8842985256699236	-0.35519517545049173
0.8930169282656352	-0.37383760691148
0.90176022639741	-0.39298923626984156
0.9105275919715903	-0.4126563118616361
0.9193182323695135	-0.4328450777411965
0.9281313886186481	-0.45356177392801134
0.9369663336718704	-0.47481263663675277
0.9458223707878501	-0.49660389849178044
0.9546988320059868	-0.5189417887273217
0.9635950767097878	-0.5418325333744405
0.9725104902730056	-0.5652823554357929
0.9814444827832274	-0.5892974750490937
0.9903964878379905	-0.6138841096401316
0.9993659614088175	-0.6390484740661075
1.0083523807688932	-0.66479678075
1.0173552434803899	-0.6911352398066043
1.0263740664377194	-0.7180700591608455
1.0354083849632447	-0.7456074446589042
1.0444577519522182	-0.7737536001726673
1.0535217370639274	-0.8025147276979583
1.0625999259562358	-0.8318970274469847
1.0716919195608932	-0.861906697935382
1.0807973333971588	-0.8925499360642324
1.0899157969214524	-0.923832937197383
1.0990469529108908	-0.955761895234383
1.1081904568787102	-0.9883430026793157
1.1173459765197082	-1.0215824507058047
1.1265131911839512	-1.055486429218429
1.1356917913771196	-1.0900611269107823
1.1448814782859509	-1.125312731320387
1.1540819633273558	-1.1612474288806571
1.1632929677198585	-1.1978714049700983
1.1725142220761058	-1.2351908439589065
1.1817454660152664	-1.273211929253137
1.1909864477942107	-1.3119408433365731
1.2002369239564386	-1.351383767810449
1.20949665899778	-1.3915468834311464
1.2187654250479483	-1.4324363701459784
1.2280430015670982	-1.4740584071271874
1.2373291750565738	-1.5164191728042467
1.2466237387830885	-1.559524844894569
1.2559264925156313	-1.603381600432716
1.2652372422744158	-1.6479956157981823
1.274555800091255	-1.69337306674185
1.2838819837807556	-1.7395201284111743
1.293215616721781	-1.786442975374171
1.3025565276486484	-1.8341477816422898
1.3119045504515692	-1.8826407206921991
1.3212595239858613	-1.9319279654865815
1.3306212918894893	-1.9820156884939604
1.3399897024085212	-2.0329100617076232
1.3493646082301034	-2.084617256663697
1.3587458663225824	-2.1371434444584
1.3681333377824274	-2.1904947957645238
1.3775268876876139	-2.244677480847197
1.3869263849571638	-2.2996976695789413
1.3963317022165376	-2.3555615314540796
1.4057427156686044	-2.4122752356025132
1.4151593049699223	-2.4698449508029108
1.4245813531120735	-2.52827684549533
1.4340087463078273	-2.587577087793301
1.443441373881895	-2.6477518454954123
1.4528791281660671	-2.708807286096393
1.4623219043985356	-2.77074957679775
1.4717696006271999	-2.833584884517956
1.481222117616783	-2.897319375902226
1.490679358759583	-2.9619592173318923
1.5001412299896935	-3.0275105749333946
1.509607639700541	-3.093979614586921
1.51907849866559	-3.1613725019346903
1.5285537199620773	-3.229695402388916
1.5380332188976396	-3.2989544811394467
1.5475169129397102	-3.3691559031611154
1.5570047216475653	-3.4403058332208007
1.5664965666069004	-3.5124104358842034
1.5759923713668351	-3.585475875522384
1.585492061379238	-3.659508316318031
1.5949955639402733	-3.7345139222714963
1.6045028081340778	-3.8104988572066123
1.6140137247784763	-3.8874692847762766
1.623528246372652	-3.965431368467835
1.63304630704669	-4.0443912716082675
1.6425678425129175	-4.124355157369181
1.6520927900189635	-4.205329188771615
1.661621088302474	-4.287319528690675
1.6711526775474101	-4.370332339860002
1.6806874993418666	-4.454373784876073
1.6902254966373518	-4.539450026202365
1.6997666137094678	-4.6255672261733425
1.7093107961199367	-4.712731546998324
1.7188579906799195	-4.800949150765215
1.7284081454145785	-4.890226199444096
1.7379612095288297	-4.980568854890699
1.7475171333742456	-5.07198327884975
1.7570758684170589	-5.164475632958211
1.7666373672072249	-5.25805207874841
1.7762015833485088	-5.352718777651039
1.7857684714695468	-5.4484818909980905
1.7953379871958564	-5.545347580025671
1.8049100871227517	-5.64332200587671
1.8144847287891368	-5.742411329603622
1.8240618706521328	-5.842621712170815
1.8336414720625247	-5.943959314457186
1.8432234932409823	-6.046430297258482
1.8528078952550346	-6.150040821289612
1.86239463999677	-6.254797047186872
1.8719836901612306	-6.360705135510102
1.8815750092254842	-6.467771246744774
1.8911685614283407	-6.576001541304021
1.9007643117506952	-6.685402179530576
1.9103622258964759	-6.795979321698685
1.9199622702741697	-6.907739128015925
1.9295644119789135	-7.020687758625005
1.9391686187751214	-7.134831373605463
1.9487748590796397	-7.250176132975352
1.9583831019454039	-7.366728196692849
1.9679933170455806	-7.484493724657823
1.977605474658184	-7.60347887671337
1.9872195456511415	-7.72368981264726
1.9968355014678003	-7.845132692193384
2.0064533141128593	-7.96781367503315
2.0160729561387045	-8.091738920796796
2.0256944006321467	-8.216914589064727
2.0353176212015356	-8.343346839368756
2.0449425919642508	-8.471041831193347
2.0545692875345374	-8.60000572397681
2.064197683011702	-8.730244677112442
2.073827753968633	-8.861764849949667
2.0834594764406438	-8.994572401795113
2.0930928269146385	-9.12867349191369
2.102727782318565	-9.264074279529591
2.112364320011173	-9.40078092382733
2.1220024177720527	-9.53879958395267
2.1316420537919423	-9.678136419013605
2.1412832066633056	-9.818797588081242
2.1509258553711694	-9.960789250190738
2.1605699792842006	-10.1041175643421
2.170215558146036	-10.248788689501104
2.179862572066834	-10.394808784600041
2.189511001515063	-10.54218400853858
2.199160827309503	-10.690920520184473
2.208812030611461	-10.841024478374381
2.21846459291719	-10.992502041914536
2.2281184960505156	-11.145359369581515
2.2377737221556453	-11.299602620122872
2.2474302536901742	-11.455237952257892
2.2570880734182674	-11.612271524678155
2.2667471644040242	-11.770709496048253
2.2764075100050034	-11.93055802500635
2.2860690938659296	-12.091823270164854
2.2957318999125476	-12.254511390110931
2.305395912345638	-12.418628543407142
2.3150611156351872	-12.584180888591986
2.3247274945147014	-12.751174584180399
2.334395033975664	-12.919615788664364
2.344063719262129	-13.089510660513342
2.3537335358654623	-13.260865358174854
2.363404469519191	-13.433686040074907
2.3730765061940033	-13.607978864618527
2.3827496320928567	-13.78374999019017
2.3924238336462125	-13.961005575154218
2.402099097507383	-14.139751777855395
2.411775410547999	-14.319994756619229
2.4214527598535787	-14.501740669752426
2.4311311327192073	-14.684995675543336
2.4408105166453242	-14.869765932262283
2.450490899333605	-15.056057598162042
2.460172268682945	-15.243876831478119
2.4698546127855394	-15.433229790429232
2.4795379199230525	-15.62412263321756
2.489222178562883	-15.816561518029193
2.498907377354509	-16.01055260303439
2.508593505125929	-16.206102046388015
2.518280550880174	-16.40321600622975
2.527968503791916	-16.601900640684526
2.5376573532041338	-16.802162107862724
2.5473470886248784	-17.004006565860593
2.5570376997240993	-17.207440172760464
2.5667291763305418	-17.41246908663107
2.5764215084287256	-17.619099465527835
2.586114686155985	-17.82733746749313
2.595808699799574	-18.03718925055658
2.6055035397938426	-18.248660972735276
2.615199196717475	-18.461758792034097
2.6248956612907843	-18.67648886644589
2.634592924373076	-18.89285735395178
2.644290976960064	-19.110870412521358
2.653989810181347	-19.33053420011297
2.6636894152979353	-19.55185487467389
2.673389783699843	-19.7748385941406
2.6830909069037183	-19.999491516438937
2.692792776550539	-20.225819799484395
2.702495384403348	-20.45382960118226
2.7121987223450477	-20.683527079427865
2.721902782376229	-20.91491839210674
2.7316075566130613	-21.148009697094867
2.741313037285217	-21.382807152258803
2.751019216733846	-21.619316915455965
2.76072608740959	-21.85754514453467
2.7704336418706443	-22.097497997334475
2.780141872780852	-22.3391816316862
2.7898507729078474	-22.58260220541222
2.7995603351212317	-22.827765876326573
2.80927055239079	-23.074678802235116
2.8189814177847476	-23.32334714093572
2.8286929244680534	-23.573777050218386
2.838405065700713	-23.825974687865443
2.848117834836144	-24.079946211651656
2.85783122531957	-24.335697779344414
2.8675452306864493	-24.59323554870381
2.8772598445609323	-24.85256567748288
2.8869750606543496	-25.11369432342762
2.8966908727637373	-25.37662764427722
2.906407274770385	-25.641371797764155
2.916124260638417	-25.907932941614302
2.9258418244133977	-26.176317233547078
2.9355599602209734	-26.446530831275595
2.9452786622655305	-26.71857989250671
2.954997924828891	-26.992470574941223
2.964717742269023	-27.268209036273912
2.974438109018788	-27.545801434193745
2.9841590195847023	-27.825253926383876
2.9938804685457328	-28.10657267052185
3.0036024505521057	-28.38976382427964
3.01332496032415	-28.674833545323843
3.0230479926511515	-28.961787991315635
3.0327715423902406	-29.25063331991104
3.0424956044652927	-29.541375688760894
3.0522201738658534	-29.834021255511
3.061945245646086	-30.128576177802262
3.071670814923736	-30.425046613270656
3.0813968768791167	-30.723438719547463
3.091123426754114	-31.023758654259225
3.1008504598512108	-31.326012575027956
3.1105779715325292	-31.630206639471123
3.1203059572188896	-31.93634700520181
3.130034412388891	-32.24443982982871
3.1397633325780037	-32.55449127095635
3.1494927133776813	-32.86650748618495
3.1592225504344946	-33.18049463311075
3.1689528394492688	-33.496458869325856
3.1786835761762484	-33.814406352418544
3.1884147564222745	-34.13434323997306
3.1981463760459743	-34.45627568956999
3.207878430956965	-34.780209858786044
3.217610917115081	-35.10615190519438
3.227343830529601	-35.43410798636443
3.2370771672585037	-35.764084259862216
3.2468109234077254	-36.09608688325019
3.256545095130438	-36.43012201408742
3.2662796786263377	-36.766195809929606
3.2760146701409463	-37.10431442832923
3.2857500659649244	-37.44448402683544
3.2954858624334	-37.7867107629943
3.3052220559253054	-38.13100079434873
3.314958642862726	-38.47736027843857
3.324695619710264	-38.82579537280069
3.3344329829744126	-39.17631223496899
3.3441707292029355	-39.5289170224745
3.3539088549842635	-39.88361589284535
3.3636473569469043	-40.240415003606984
3.37338623175885	-40.599320512281984
3.383125476127009	-40.96033857639034
3.3928650867966414	-41.32347535344931
3.4026050605508025	-41.68873700097365
3.4123453942097965	-42.05612967647547
3.4220860846306476	-42.42565953746447
3.431827128706566	-42.79733274144778
3.441568523366435	-43.17115544593026
3.4513102655743024	-43.54713380841424
3.4610523523288803	-43.92527398639985
3.4707947806630504	-44.305582137384874
3.480537547643388	-44.68806441886484
3.49028065036968	-45.07272698833309
3.5000240859744642	-45.459576003280795
3.509767851622564	-45.84861762119698
3.519511944510643	-46.23985799956864
3.5292563618667554	-46.63330329588063
3.539001100949916	-47.028959667615844
3.5487461590496663	-47.4268332722552
3.5584915334856513	-47.82693026727765
3.5682372216072107	-48.22925681016024
3.577983220792966	-48.633819058378094
3.587729528450415	-49.040623169404626
3.5974761420155477	-49.44967530071128
3.6072230589524485	-49.86098160976784
3.616970276752915	-50.274548254042266
3.626717792936088	-50.690381391000884
3.6364656050480733	-51.108487178108234
3.646213710661584	-51.528871772827316
3.65596210737558	-51.9515413326194
3.6657107928149153	-52.37650201494425
3.6754597646299927	-52.80375997725997
3.6852090204964205	-53.233321377023245
3.6949585581146787	-53.66519237168914
3.7047083752097882	-54.099379118711276
3.7144584695309852	-54.53588777554182
3.724208838851401	-54.97472449963154
3.733959480967748	-55.41589544842973
3.7437103937000096	-55.85940677938435
3.7534615748911317	-56.30526464994198
3.763213022406729	-56.753475217547916
3.7729647341347845	-57.20404463964606
3.7827167079853576	-57.65697907367911
3.792468941890301	-58.11228467708851
3.8022214338029783	-58.56996760731437
3.8119741816979817	-59.030034021795714
3.8217271835708644	-59.49249007797023
3.831480437437869	-59.957341933274584
3.8412339413356604	-60.42459574514416
3.8509876933210676	-60.89425767101333
3.8607416914708246	-61.36633386831521
3.8704959338813194	-61.84083049448202
3.880250418668343	-62.3177537069447
3.8900051439668433	-62.79710966313331
3.899760107930686	-63.27890452047679
3.909515308732412	-63.76314443640313
3.9192707445630077	-64.24983556833921
3.929026413631672	-64.73898407371112
