# Supplementary material for: Critical Phenomena of Charged AdS Black Holes in Rastall Gravity
Source: Hindawi journal article supplement (doi:10.1155/2020/4065254), 2020-01-24
Supplement: f1 [file 4065254.f1.zip › Fig3(b)-GT1.dat]

2716.6541055030975	-1.6683925279361038
213.31176672474226	-0.3726974265905475
43.47618516325798	-0.07535255558402094
13.083713818535472	0.0346945420250592
4.900812892284534	0.08477556225456061
2.143998683273459	0.11026707138358079
1.078343177190483	0.12411984092743478
0.6285575589652552	0.13193569629890428
0.4279360470598874	0.13642522921602612
0.3356510703658131	0.1390093482705102
0.2927546527279272	0.14047833890659375
0.27296648881081875	0.1412917755968589
0.2640296592246605	0.14172602415710414
0.26005603215776585	0.14195140958628455
0.25817676225725883	0.1420746670308924
0.25700003423638185	0.1421632842879888
0.2558715524698538	0.14225995360581148
0.25450854279857826	0.1423914065724366
0.2528143080724641	0.14257395106653442
0.2507828162738335	0.14281701537383795
0.24844930384372066	0.14312545767420795
0.24586483648705104	0.14350109380721587
0.24308349565708776	0.14394372057349666
0.2401562516026734	0.1444518080283236
0.23712836262758946	0.1450229714013727
0.23403860183788044	0.14565429443348799
0.23091939443424891	0.14634255143820107
0.22779737215930268	0.1470843596937665
0.22469408297579063	0.14787628354178745
0.22162672103225306	0.14871490480842114
0.218608811481519	0.14959686963883922
0.2156508223726318	0.15051891877058698
0.21276069577243695	0.15147790617334705
0.20994430036491657	0.15247080953247288
0.20720581244309955	0.15349473504267075
0.20454803393787102	0.15454691826787717
0.20197265632013062	0.15562472232083868
0.19948047865041527	0.15672563425819888
0.19707158716517093	0.1578472603309577
0.19474550281342864	0.1589873205462372
0.19250130221069311	0.16014364286363927
0.19033771661394527	0.16131415725357795
0.18825321276356055	0.16249688977552051
0.18624605878696687	0.16368995678376594
0.18431437780817547	0.1648915593319843
0.18245619144613684	0.16609997782146424
0.18066945500128595	0.16731356691913643
0.17895208581208294	0.16853075075797536
0.17730198600126956	0.16975001842288168
0.17571706061570008	0.17096991971854822
0.17419523198602588	0.17218906121133787
0.17273445098651163	0.17340610253427713
0.17133270575525092	0.17461975294246526
0.1699880283363793	0.17582876810521292
0.16869849962473285	0.17703194712081335
0.16746225292662065	0.1782281297398503
0.16627747639538654	0.17941619378323226
0.16514241455511913	0.18059505274161403
0.16405536908849316	0.1817636535434663
0.16301469903387722	0.18292097447972105
0.16201882051136157	0.18406602327362773
0.16106620607629585	0.18519783528517084
0.16015538378150315	0.18631547184011185
0.15928493601491384	0.1874180186744074
0.15845349816742144	0.18850458448541926
0.15765975717586572	0.1895742995819641
0.1569024499778503	0.19062631462584317
0.15618036190830342	0.19165979945805336
0.15549232506205818	0.19267394200339968
0.15483721664205907	0.19366794724771608
0.15421395730893456	0.19464103628235002
0.15362150954447368	0.19559244541098303
0.1530588760388946	0.1965214253142446
0.1525250981096075	0.19742724026792852
0.15201925415736595	0.19830916741095195
0.15154045816421724	0.19916649605949477
0.15108785823643983	0.19999852706403345
0.15066063519465708	0.20080457220624126
0.15025800121250094	0.20158395363295564
0.14987919850453707	0.20233600332463297
0.14952349806362814	0.20306006259590487
0.14919019844748305	0.20375548162603363
0.14887862461379966	0.20442161901723035
0.14858812680314132	0.20505784137895225
0.1483180794684788	0.20566352293643697
0.14806788025017525	0.20623804516186134
0.1478369489950726	0.20678079642663016
0.1476247268182591	0.20729117167341146
0.14743067520604192	0.20776857210663463
0.14725427515861783	0.20821240490026166
0.1470950263709236	0.20862208292172574
0.14695244645014688	0.2089970244710127
0.14682607016839572	0.20933665303393034
0.1467154487490456	0.20964039704868206
0.14662014918531455	0.2099076896849184
0.14653975358965346	0.21013796863450102
0.14647385857257905	0.2103306759132644
0.1464220746496196	0.2104852576731105
0.14638402567509112	0.21060116402381598
0.14635934830146685	0.21067784886397403
0.14634769146315116	0.21071476972053094
0.14634871588351733	0.21071138759641395
0.14636209360411517	0.2106671668257798
0.14638750753500168	0.21058157493644442
0.14642465102519445	0.21045408251908232
0.14647322745229086	0.21028416310281162
0.1465329498303423	0.21007129303680394
0.14660354043511173	0.20981495137758305
0.14668473044588703	0.2095146197816958
0.14677625960305923	0.20916978240345932
0.14687787588071416	0.20877992579750743
0.1469893351735222	0.20834453882587514
0.14711040099724498	0.20786311256937723
0.14724084420221167	0.20733514024305114
0.14738044269914943	0.20676011711544828
0.14752898119678268	0.20613754043157145
0.14768625095064464	0.2054669093392672
0.14785204952257303	0.20474772481889392
0.14802618055038697	0.20397948961609685
0.14820845352726775	0.2031617081775311
0.1483986835903902	0.20229388658938235
0.14859669131837303	0.20137553251854495
0.14880230253713916	0.20040615515632335
0.149015348133796	0.1993852651645322
0.1492356638781668	0.19831237462387594
0.14946309025162077	0.19718699698449632
0.14969747228286812	0.19600864701858278
0.14993865939040268	0.19477684077494425
0.15018650523129035	0.1934910955354507
0.1504408675560156	0.19215092977325227
0.15070160806911442	0.19075586311269443
0.15096859229533305	0.18930541629084702
0.15124168945106667	0.1877991111205733
0.15152077232084274	0.18623647045506692
0.151805717138626	0.18461701815378873
0.15209640347373238	0.18294027904973933
0.15239271412114988	0.18120577891800752
0.15269453499607394	0.17941304444553485
0.15300175503247393	0.17756160320204425
0.15331426608551627	0.17565098361207793
0.15363196283767838	0.1736807149280974
0.15395474270839513	0.17165032720459825
0.1542825057670863	0.16955935127319402
0.15461515464942308	0.16740731871862882
0.15495259447669466	0.1651937618556774
0.1552947327781462	0.16291821370689402
0.1556414794161627	0.16058020798117525
0.15599274651418038	0.1581792790531009
0.15634844838721296	0.15571496194302076
0.15670850147488402	0.15318679229785576
0.15707282427686306	0.15059430637258361
0.157441337290607	0.14793704101238045
0.15781396295131278	0.14521453363539222
0.15819062557399216	0.14242632221610857
0.15857125129758265	0.13957194526931613
0.15895576803101336	0.1366509418346068
0.15934410540114702	0.1336628514614191
0.15973619470252465	0.1306072141945907
0.1601319688488406	0.12748357056040338
0.16053136232608045	0.12429146155309816
0.16093431114725648	0.12103042862184468
0.16134075280867838	0.11770001365814628
0.16175062624769979	0.1142997589836626
0.16216387180188355	0.1108292073384356
0.16258043116953108	0.10728790186950174
0.1630002473715242	0.10367538611987685
0.16342326471442856	0.09999120401789818
0.16384942875481187	0.09623489986691139
0.1642786862647303	0.09240601833528875
0.16471098519833982	0.08850410444676649
0.1651462746595901	0.08452870357108919
0.1655845048709607	0.08047936141494966
0.16602562714320154	0.0763556240132143
0.1664695938460397	0.07215703772042227
0.1669163583798182	0.06788314920254968
0.16736587514803164	0.06353350542902794
0.16781809953072752	0.059107653665008406
0.16827298785874023	0.05460514146386382
0.16873049738872942	0.05002551665991766
0.16919058627899267	0.045368327361393956
0.16965321356602575	0.0406331219435806
0.1701183391418033	0.035819449042195764
0.17058592373175477	0.03092685754695429
0.17105592887341126	0.025954896595323365
0.17152831689569953	0.02090311556646375
0.1720030508988608	0.01577106407534872
0.17248009473497267	0.010558291967054455
0.17295941298905304	0.005264349311217463
0.17344097096072658	-0.0001112136033485367
0.17392473464643404	-0.0055688462738799765
0.17441067072216582	-0.011108997988741195
0.17489874652670262	-0.016732117832357514
0.1753889300453453	-0.022438654690007602
0.1758811898941183	-0.02822905725248233
0.17637549530442953	-0.03410377402061009
0.17687181610817337	-0.040063253309657085
0.17737012272326022	-0.04610794325360563
0.17787038613955952	-0.0522382918093118
0.1783725779052426	-0.05845474676055128
0.1788766701135119	-0.0647577557219511
0.1793826353897043	-0.07114776614281648
0.1798904468787561	-0.07762522531085303
0.18040007823301835	-0.08419058035578605
0.18091150360041064	-0.09084427825288648
0.1814246976129035	-0.09758676582639758
0.18193963537531782	-0.10441848975287413
0.1824562924544318	-0.1113398965644315
0.1829746448683857	-0.11835143265190631
0.18349466907637488	-0.12545354426793914
0.1840163419686221	-0.13264667752997092
0.18453964085662053	-0.13993127842316547
0.18506454346363832	-0.14730779280325249
0.18559102791547813	-0.1547766663993013
0.18611907273148187	-0.16233834481641768
0.18664865681577464	-0.1699932735383776
0.1871797594487397	-0.17774189793018783
0.1877123602787179	-0.18558466324058767
0.1882464393139242	-0.19352201460448037
0.18878197691457552	-0.20155439704531078
0.18931895378522257	-0.20968225547737634
0.18985735096728065	-0.2179060347080868
0.1903971498317524	-0.2262261794401612
0.19093833207213756	-0.23464313427377753
0.1914808796975238	-0.24315734370866177
0.19202477502585363	-0.251769252146134
0.19257000067736146	-0.2604793038910956
0.19311653956817706	-0.26928794315397653
0.19366437490408941	-0.27819561405262805
0.19421349017446676	-0.28720276061417604
0.19476386914632848	-0.2963098267768241
0.19531549585856417	-0.3055172563916193
0.19586835461629573	-0.3148254932241693
0.1964224299853787	-0.3242349809563246
0.1969777067870382	-0.333746163187819
0.19753417009263619	-0.3433594834378674
0.1980918052185667	-0.3530753851467343
0.19865059772127389	-0.36289431167725694
0.19921053339239175	-0.37281670631634023
0.19977159825399976	-0.38284301227641127
0.2003337785539933	-0.39297367269684585
0.20089706076156377	-0.4032091306453554
0.20146143156278698	-0.41354982911935007
0.20202687785631587	-0.42399621104726243
0.2025933867491751	-0.4345487192898496
0.2031609455526543	-0.44520779664145704
0.20372954177829813	-0.45597388583126297
0.20429916313398938	-0.46684742952448544
0.20486979752012385	-0.47782887032357196
0.20544143302587323	-0.48891865076935304
0.20601405792553504	-0.50011721334218
0.20658766067496576	-0.5114250004630271
0.2071622299080965	-0.5228424544945803
0.2077377544335275	-0.5343700177422908
0.2083142232312009	-0.5460081324554171
0.2088916254491484	-0.5577572408280341
0.20946995040031247	-0.5696177850000277
0.21004918755943938	-0.5815902070580623
0.21062932656004155	-0.5936749490365336
0.21121035719142817	-0.605872452918495
0.21179226939580156	-0.6181831606365661
0.21237505326541833	-0.6306075140738251
0.21295869903981282	-0.6431459550646766
0.21354319710308228	-0.655798925395707
0.21412853798123102	-0.6685668668065154
0.2147147123395733	-0.6814502209905348
0.21530171098019224	-0.6944494295958268
0.21588952483945448	-0.7075649342258703
0.21647814498557788	-0.7207971764403223
0.2170675626162526	-0.7341465977557754
0.21765776905631246	-0.747613639646487
0.21824875575545685	-0.7611987435451051
0.21884051428602072	-0.7749023508433688
0.21943303634079253	-0.7887249028928044
0.22002631373087778	-0.8026668410053989
0.22062033838360848	-0.8167286064542656
0.22121510234049588	-0.8309106404742924
0.22181059775522677	-0.8452133842627807
0.22240681689170114	-0.8596372789800671
0.22300375212211124	-0.8741827657501385
0.22360139592505998	-0.888850285661227
0.22419974088371894	-0.9036402797664034
0.22479877968402368	-0.9185531890841458
0.22539850511290677	-0.9335894545989118
0.22599891005656672	-0.948749517261688
0.22659998749877197	-0.9640338179905305
0.2272017305192003	-0.9794427976711028
0.2278041322918109	-0.9949768971571924
0.2284071860832501	-1.0106365572712266
0.22901088525128885	-1.0264222188047687
0.2296152232432918	-1.0423343225190176
0.23022019359471682	-1.0583733091452818
0.23082578992764474	-1.0745396193854622
0.23143200594933824	-1.0908336939125065
0.23203883545082904	-1.1072559733708742
0.23264627230553356	-1.123806898376976
0.23325431046789538	-1.1404869095196168
0.2338629439720546	-1.157296447360424
0.23447216693054312	-1.1742359524342703
0.2350819735330057	-1.1913058652496875
0.23569235804494537	-1.2085066262892736
0.2363033148064936	-1.225838676010091
0.2369148382312043	-1.2433024548440594
0.2375269228048704	-1.2608984031983383
0.23813956308436415	-1.278626961455706
0.23875275369649884	-1.296488569974928
0.23936648933691257	-1.3144836690911246
0.2399807647689732	-1.332612699116121
0.24059557482270427	-1.3508761003388057
0.24121091439373088	-1.3692743130254679
0.2418267784422457	-1.387807777420139
0.24244316199199445	-1.406476933744926
0.24306006012928008	-1.4252822222003307
0.24367746800198603	-1.4442240829655784
0.24429538081861726	-1.4633029561989241
0.2449137938473594	-1.4825192820379676
0.24553270241515499	-1.5018735005999524
0.24615210190679718	-1.5213660519820682
0.2467719877640397	-1.540997376261735
0.24739235548472346	-1.5607679134969046
0.2480132006219191	-1.580678103726326
0.24863451878308493	-1.6007283869698377
0.2492563056292404	-1.6209192032286313
0.24987855687415464	-1.6412509924855259
0.25050126828354935	-1.661724194705223
0.2511244356743164	-1.6823392498345757
0.25174805491374935	-1.7030965978028336
0.25237212191878855	-1.7239966785218999
0.2529966326552801	-1.7450399318865701
0.2536215831372477	-1.7662267977747828
0.25424696942617764	-1.7875577160478473
0.2548727876303164	-1.8090331265506838
0.2554990339039803	-1.8306534691120482
0.2561257044468782	-1.852419183544764
0.25675279550344504	-1.8743307096459358
0.2573803033621876	-1.8963884871971723
0.2580082243550419	-1.918592955964803
0.25863655485674125	-1.940944555700082
0.2592652912841955	-1.9634437261394018
0.2598944300958812	-1.9860909070044934
0.2605239677912421	-2.00888653800263
0.26115390091009993	-2.031831058826819
0.26178422603207546	-2.054924909156003
0.26241493977601943	-2.0781685286552447
0.263046038799453	-2.1015623569759176
0.2636775197980178	-2.1251068337558885
0.2643093795049359	-2.1488023986197042
0.2649416146904777	-2.1726494911787615
0.2655742221614401	-2.1966485510314935
0.2662071987606325	-2.2208000177635303
0.2668405413663718	-2.2451043309478833
0.2674742468919862	-2.2695619301450987
0.26810831228532644	-2.2941732549034355
0.2687427345282861	-2.3189387447590146
0.26937751063632914	-2.3438588392359896
0.27001263765802563	-2.3689339778466967
0.2706481126745952	-2.394164600091813
0.27128393279945767	-2.4195511454605065
0.27192009517779153	-2.4450940534305885
0.2725565969860991	-2.470793763468657
0.2731934354317792	-2.4966507150302437
0.273830607752707	-2.522665347559961
0.27446811121681974	-2.548838100491635
0.27510594312171044	-2.575169413248448
0.2757441007942269	-2.601659725243077
0.2763825815900784	-2.6283094758778245
0.2770213828934477	-2.655119104544749
0.27766050211660986	-2.6820890506258013
0.27829993669955694	-2.709219753492947
0.2789396841096287	-2.736511652508296
0.27957974184114937	-2.763965187024222
0.2802201074150696	-2.7915807963834944
0.2808607783786149	-2.8193589199193863
0.28150175230493935	-2.847299996955803
0.28214302679278386	-2.8754044668073933
0.28278459946614143	-2.903672768779671
0.28342646797392645	-2.932105342169118
0.2840686299896494	-2.960702626263308
0.2847110832110968	-2.989465060341005
0.2853538253600164	-3.018393083672282
0.2859968541818062	-3.0474871355186206
0.2866401674452098	-3.076747655133021
0.28728376294201524	-3.106175081760099
0.2879276384867587	-3.1357698546361976
0.28857179191643334	-3.1655324129894793
0.2892162210902019	-3.1954631960400297
0.2898609238891144	-3.225562642999957
0.29050589821582895	-3.255831193073478
0.2911511419943384	-3.2862692854570295
0.2917966531696995	-3.316877359339344
0.292442429707768	-3.3476558539015593
0.29308846959493556	-3.3786052083172917
0.29373477083787264	-3.409725861752743
0.29438133146327383	-3.4410182533667735
0.29502814951760775	-3.4724828223110005
0.29567522306687066	-3.504120007729874
0.2963225501963431	-3.535930248760773
0.2969701290103511	-3.567913984534078
0.2976179576320299	-3.6000716541732576
0.2982660342030922	-3.63240369679495
0.298914356883599	-3.664910551509043
0.29956292385173433	-3.6975926574187494
0.30021173330358264	-3.73045045362069
0.3008607834529109	-3.7634843792049697
0.30151007253095147	-3.796694873255238
0.3021595987861909	-3.8300823748487893
0.3028093604841597	-3.8636473230566173
0.303459355907226	-3.897390156943496
0.30410958335439225	-3.9313113155680397
0.30476004114109456	-3.965411237982789
0.30541072759900556	-3.9996903632342717
0.30606164107583866	-4.034149130363069
0.30671277993515733	-4.068787978403893
0.3073641425561844	-4.103607346385635
0.3080157273336169	-4.138607673331452
0.3086675326774414	-4.173789398258821
0.3093195570127529	-4.209152960179602
0.30997179877957604	-4.244698798100101
0.3106242564326892	-4.280427351021136
0.3112769284414504	-4.316339057938101
0.31192981328962666	-4.352434357841017
0.3125829094752243	-4.388713689714593
0.31323621551032343	-4.425177492538299
0.31388972992091285	-4.461826205286403
0.31454345124672883	-4.498660266928051
0.3151973780410953	-4.535680116427297
0.31585150887076646	-4.572886192743184
0.31650584231577156	-4.6102789348297835
0.31716037696926175	-4.647858781636263
0.31781511143735913	-4.685626172106918
0.31847004433900805	-4.723581545181248
0.319125174305828	-4.761725339793998
0.31978049998196906	-4.80005799487521
0.32043602002396865	-4.838579949350271
0.32109173310061084	-4.877291642139975
0.3217476378927876	-4.916193512160558
0.32240373309336123	-4.955285998323762
0.32306001740702944	-4.9945695395368634
0.3237164895501916	-5.034044574702742
0.3243731482508176	-5.073711542719913
0.32502999224831747	-5.113570882482582
0.3256870202934136	-5.15362303288069
0.32634423114801436	-5.193868432799945
0.3270016235850889	-5.234307521121889
0.3276591963885447	-5.274940736723927
0.3283169483531061	-5.31576851847938
0.32897487828419386	-5.356791305257509
0.3296329849978078	-5.398009535923583
0.3302912673204095	-5.439423649338906
0.3309497240888075	-5.481034084360867
0.3316083541500436	-5.522841279842958
0.3322671563612808	-5.564845674634848
0.33292612958969264	-5.607047707582401
0.33358527271235394	-5.649447817527725
0.33424458461613304	-5.692046443309194
0.33490406419758556	-5.734844023761512
0.3355637103628492	-5.777840997715733
0.33622352202754047	-5.821037803999305
0.33688349811665164	-5.864434881436099
0.33754363756445094	-5.908032668846458
0.3382039393143818	-5.951831605047226
0.33886440231896503	-5.995832128851789
0.33952502553970154	-6.04003467907009
0.34018580794697645	-6.084439694508695
0.34084674851996466	-6.1290476139708066
0.3415078462465369	-6.173858876256301
0.34216910012316804	-6.218873920161769
0.3428305091548455	-6.264093184480534
0.3434920723549795	-6.3095171080027015
0.34415378874531455	-6.355146129515182
0.3448156573558413	-6.400980687801733
0.34547767722471007	-6.447021221642961
0.3461398473981456	-6.493268169816398
0.3468021669303623	-6.539721971096494
0.34746463488348134	-6.586383064254672
0.3481272503274476	-6.633251888059337
0.3487900123399491	-6.680328881275923
0.3494529200063363	-6.727614482666912
0.3501159724195429	-6.7751091309918765
0.35077916868000747	-6.8228132650074835
0.35144250789559617	-6.870727323467548
0.3521059891815265	-6.918851745123049
0.35276961166029147	-6.967186968722164
0.3534333744615853	-7.015733433010272
0.35409727672222996	-7.064491576730021
0.354761317586102	-7.1134618386213235
0.3554254962040614	-7.162644657421401
0.3560898117338798	-7.212040471864785
0.3567542633401711	-7.261649720683369
0.3574188501943218	-7.31147284260643
0.35808357147442277	-7.361510276360643
0.3587484263652018	-7.411762460670113
0.35941341405795646	-7.462229834256386
0.36007853375048837	-7.5129128358385024
0.36074378464703816	-7.563811904132989
0.3614091659582208	-7.614927477853911
0.36207467690096234	-7.666259995712865
0.3627403166984366	-7.71780989641903
0.3634060845800034	-7.769577618679178
0.36407197978114725	-7.821563601197702
0.3647380015434161	-7.873768282676617
0.3654041491143624	-7.9261921018156185
0.36607042174748305	-7.978835497312073
0.3667368187021613	-8.031698907861067
0.36740333924360863	-8.084782772155393
0.368069982642808	-8.138087528885602
0.368736748176457	-8.191613616740014
0.3694036351269123	-8.245361474404744
0.37007064278213436	-8.2993315405637
0.3707377704356328	-8.353524253898632
0.3714050173864126	-8.407940053089138
0.37207238293892114	-8.462579376812691
0.37273986640299506	-8.51744266374464
0.3734074670938086	-8.572530352558248
0.37407518433182185	-8.627842881924714
0.37474301744273014	-8.683380690513179
0.37541096575741395	-8.739144216990749
0.3760790286118885	-8.795133900022508
0.3767472053472558	-8.851350178271547
0.3774154953096549	-8.907793490398985
0.3780838978502148	-8.964464275063973
0.37875241232500634	-9.021362970923706
0.37942103809499583	-9.078490016633472
0.38008977452599857	-9.135845850846646
0.38075862098863256	-9.193430912214705
0.3814275768582738	-9.251245639387252
0.3820966415150108	-9.30929047101203
0.3827658143436011	-9.367565845734948
0.38343509473342674	-9.426072202200093
0.384104482078451	-9.484809979049723
0.38477397577717615	-9.543779614924322
0.3854435752326005	-9.602981548462589
0.38611327985217664	-9.662416218301477
0.38678308904777026	-9.722084063076162
0.38745300223561896	-9.78198552142012
0.3881230188362918	-9.842121031965092
0.3887931382746493	-9.902491033341146
0.3894633599798037	-9.963095964176626
0.39013368338508	-10.023936263098234
0.39080410792797693	-10.085012368731013
0.3914746330501292	-10.146324719698356
0.39214525819726875	-10.207873754622042
0.39281598281918795	-10.269659912122219
0.39348680636970235	-10.331683630817448
0.39415772830661383	-10.393945349324714
0.3948287480916748	-10.456445506259412
0.3954998651905516	-10.519184540235386
0.3961710790727897	-10.582162889864945
0.39684238921177845	-10.645380993758854
0.397513795084716	-10.708839290526372
0.39818529617257536	-10.772538218775242
0.3988568919600703	-10.836478217111724
0.39952858193562174	-10.900659724140594
0.4002003655913246	-10.965083178465168
0.40087224242291464	-11.02974901868729
0.40154421192973616	-11.094657683407387
0.40221627361470985	-11.159809611224441
0.40288842698430105	-11.225205240736027
0.4035606715484875	-11.290845010538296
0.4042330068207294	-11.356729359226025
0.40490543231793735	-11.422858725392596
0.4055779475604429	-11.489233547630043
0.4062505520719676	-11.555854264529005
0.4069232453795933	-11.6227213146788
0.4075960270137328	-11.689835136667407
0.40826889650810066	-11.757196169081475
0.40894185339968403	-11.82480485050635
0.40961489722871397	-11.892661619526045
0.41028802753863725	-11.96076691472332
0.4109612438760884	-12.029121174679625
0.411634545790862	-12.097724837975163
0.4123079328358848	-12.166578343188853
0.4129814045671892	-12.23568212889837
0.41365496054388556	-12.305036633680164
0.41432860032813673	-12.374642296109446
0.4150023234851304	-12.444499554760203
0.4156761295830538	-12.514608848205217
0.4163500181930681	-12.58497061501607
0.4170239888892823	-12.655585293763163
0.4176980412487284	-12.726453323015699
0.418372174851336	-12.797575141341728
0.41904638927990795	-12.868951187308124
0.4197206841200957	-12.940581899480632
0.4203950589603749	-13.012467716423826
0.4210695133920216	-13.084609076701165
0.4217440470090886	-13.157006418874987
0.42241865940838147	-13.229660181506512
0.4230933501894357	-13.302570803155836
0.4237681189544936	-13.37573872238198
0.42444296530848147	-13.449164377742882
0.4251178888589867	-13.52284820779538
0.42579288921623604	-13.596790651095255
0.42646796599307285	-13.670992146197213
0.4271431188049355	-13.745453131654923
0.4278183472698359	-13.820174046021002
0.42849365100833775	-13.895155327847027
0.4291690296435349	-13.970397415683541
0.4298444828010313	-14.04590074808008
0.4305200101089193	-14.12166576358516
0.43119561119775957	-14.197692900746295
0.43187128570056005	-14.27398259810999
0.4325470332527564	-14.350535294221782
0.43322285349219186	-14.427351427626208
0.43389874605909684	-14.504431436866854
0.43457471059607017	-14.581775760486309
0.43525074674805886	-14.65938483702623
0.4359268541623396	-14.737259105027313
0.4366030324884991	-14.815399003029313
0.4372792813784154	-14.893804969571043
0.43795560048623944	-14.972477443190389
0.4386319894683762	-15.051416862424324
0.43930844798346685	-15.130623665808908
0.43998497569236994	-15.210098291879268
0.4406615722581439	-15.28984117916966
0.44133823734602934	-15.369852766213429
0.44201497062343115	-15.450133491543053
0.44269177175990104	-15.530683793690095
0.4433686404271205	-15.611504111185281
0.44404557629888347	-15.692594882558453
0.4447225790510796	-15.773956546338592
0.4453996483616773	-15.85558954105385
0.446076783910707	-15.93749430523148
0.44675398538024497	-16.01967127739795
0.4474312524543969	-16.102120896078862
0.4481085848192819	-16.184843599799017
0.4487859821630158	-16.267839827082344
0.44946344417569645	-16.351110016452008
0.45014097054938695	-16.434654606430353
0.450818560978101	-16.518474035538905
0.4514962151577867	-16.602568742298402
0.45217393278631157	-16.686939165228797
0.45285171356344806	-16.771585742849243
0.45352955719085747	-16.856508913678137
0.4542074633720761	-16.94170911623307
0.45488543181249996	-17.027186789030896
0.45556346221937055	-17.112942370587696
0.4562415543017602	-17.198976299418792
0.456919707770558	-17.28528901403875
0.4575979223384555	-17.371880952961412
0.4582761977199329	-17.458752554699853
0.4589545336312447	-17.545904257766445
0.4596329297904068	-17.6333365006728
0.46031138591718185	-17.721049721929823
0.4609899017330665	-17.809044360047704
0.4616684769612777	-17.897320853535916
0.4623471113267396	-17.98587964090323
0.4630258045560703	-18.074721160657703
0.4637045563775687	-18.163845851306693
0.4643833665212021	-18.25325415135688
0.465062234718593	-18.34294649931427
0.46574116070300636	-18.432923333684137
0.4664201442093376	-18.52318509297113
0.4670991849740995	-18.613732215679196
0.4677782827354108	-18.704565140311633
0.4684574372329826	-18.79568430537106
0.46913664820810785	-18.887090149359448
0.46981591540364837	-18.97878311077811
0.47049523856402303	-19.070763628127732
0.4711746174351965	-19.16303213990831
0.47185405176466716	-19.255589084619245
0.47253354130145575	-19.348434900759298
0.47321308579609384	-19.44157002682658
0.4738926850006124	-19.534994901318584
0.4745723386685307	-19.628709962732184
0.4752520465548454	-19.72271564956365
0.47593180841601895	-19.817012400308634
0.47661162400996904	-19.91160065346216
0.47729149309605756	-20.006480847518674
0.47797141543508026	-20.101653420972013
0.47865139078925545	-20.19711881231541
0.4793314189222141	-20.292877460041534
0.48001149959898864	-20.388929802642437
0.4806916325860035	-20.485276278609607
0.48137181765106407	-20.58191732643395
0.4820520545633468	-20.678853384605812
0.4827323430933893	-20.77608489161492
0.4834126830130798	-20.873612285950493
0.4840930740956479	-20.971436006101165
0.4847735161156541	-21.06955649055501
0.4854540088489806	-21.167974177799532
0.4861345520728212	-21.266689506321715
0.48681514556567207	-21.365702914607976
0.48749578910732205	-21.465014841144214
0.4881764824788431	-21.56462572441574
0.4888572254625814	-21.664536002907376
0.4895380178421479	-21.7647461151034
0.49021885940240895	-21.865256499487558
0.4908997499294774	-21.966067594543063
0.49158068921070364	-22.067179838752622
0.4922616770346666	-22.168593670598415
0.4929427131911651	-22.270309528562127
0.4936237974712084	-22.372327851124897
0.49430492966700834	-22.47464907676739
0.49498610957197037	-22.577273643969757
0.4956673369806847	-22.680201991211646
0.4963486116889185	-22.783434556972228
0.49702993349360663	-22.886971779730146
0.4977113021928442	-22.990814097963565
0.49839271758587766	-23.094961950150193
0.49907417947309685	-23.199415774767235
0.49975568765602685	-23.304176010291393
0.50043724193732	-23.40924309519892
0.5011188421207476	-23.514617467965603
0.5018004880111929	-23.62029956706675
0.5024821794146416	-23.72628983097717
0.5031639161381759	-23.83258869817126
0.5038456979899655	-23.939196607122923
0.5045275247792607	-24.04611399630562
0.505209396316384	-24.153341304192352
0.5058913124127234	-24.260878969255657
0.506573272880725	-24.368727429967652
0.5072552775338844	-24.47688712479999
0.5079373261867407	-24.58535849222387
0.5086194186548686	-24.694141970710085
0.5093015547548712	-24.803237998728957
0.509983734304373	-24.912647014750405
0.5106659571220128	-25.022369457243883
0.5113482230274365	-25.13240576467845
0.5120305318412903	-25.24275637552272
0.5127128833852135	-25.35342172824489
0.5133952774818322	-25.464402261312745
0.514077713954752	-25.57569841319364
0.5147601926285509	-25.687310622354513
0.5154427133287739	-25.79923932726191
0.5161252758819251	-25.91148496638197
0.5168078801154616	-26.024047978180388
0.5174905258577872	-26.136928801122497
0.5181732129382451	-26.250127873673208
0.5188559411871126	-26.363645634297058
0.5195387104355941	-26.47748252145814
0.5202215205158145	-26.591638973620203
0.5209043712608136	-26.70611542924658
0.5215872625045394	-26.820912326800237
0.5222701940818423	-26.93603010474373
0.5229531658284686	-27.05146920153923
0.523636177581055	-27.16723005564857
0.5243192291771217	-27.283313105533153
0.5250023204550671	-27.399718789654038
0.5256854512541619	-27.516447546471905
0.5263686214145429	-27.633499814447053
0.5270518307772074	-27.75087603203942
0.5277350791840075	-27.868576637708586
0.5284183664776437	-27.98660206991375
0.5291016925016605	-28.104952767113765
0.5297850571004391	-28.223629167767125
0.5304684601191937	-28.342631710331958
0.531151901403964	-28.46196083326603
0.5318353808016111	-28.581616975026776
0.5325188981598118	-28.701600574071264
0.5332024533270527	-28.82191206885625
0.5338860461526252	-28.942551897838072
0.53456967648662	-29.06352049947279
0.5352533441799215	-29.184818312216105
0.5359370490842039	-29.30644577452338
0.5366207910519241	-29.428403324849615
0.5373045699363176	-29.55069140164951
0.5379883855913935	-29.67331044337742
0.5386722378719295	-29.79626088848737
0.5393561266334657	-29.919543175433052
0.5400400517323007	-30.043157742667827
0.5407240130254867	-30.167105028644748
0.5414080103708235	-30.291385471816536
0.5420920436268553	-30.415999510635586
0.5427761126528637	-30.540947583553983
0.5434602173088652	-30.666230129023496
0.5441443574556046	-30.791847585495585
0.544828532954551	-30.917800391421366
0.5455127436678933	-31.044088985251683
0.5461969894585351	-31.17071380543706
0.5468812701900905	-31.297675290427705
0.5475655857268791	-31.42497387867353
0.5482499359339214	-31.55261000862413
0.5489343206769348	-31.680584118728817
0.5496187398223289	-31.80889664743659
0.5503031932372009	-31.937548033196176
0.5509876807893308	-32.06653871445596
0.5516722023471782	-32.195869129664075
0.5523567577798765	-32.32553971726834
0.55304134695723	-32.45555091571632
0.5537259697497081	-32.58590316345522
0.5544106260284427	-32.71659689893202
0.5550953156652225	-32.84763256059339
0.5557800385324903	-32.97901058688575
0.5564647945033366	-33.11073141625516
0.5571495834514986	-33.24279548714749
0.5578344052513531	-33.37520323800829
0.5585192597779142	-33.50795510728283
0.5592041469068288	-33.64105153341611
0.559889066514373	-33.77449295485286
0.5605740184774469	-33.908279810037534
0.5612590026735723	-34.042412537414336
0.5619440189808875	-34.17689157542716
0.5626290672781445	-34.31171736251967
0.5633141474447039	-34.44689033713526
0.5639992593605322	-34.58241093771706
0.5646844029061974	-34.71827960270791
0.5653695779628651	-34.85449677055042
0.5660547844122962	-34.99106287968694
0.5667400221368406	-35.12797836855957
0.5674252910194361	-35.265243675610115
0.5681105909436028	-35.402859239280154
0.5687959217934412	-35.540825498011024
0.5694812834536267	-35.67914289024377
0.5701666758094078	-35.817811854419254
0.5708520987466017	-35.95683282897803
0.5715375521515906	-36.09620625236045
0.5722230359113186	-36.235932563006564
0.5729085499132881	-36.37601219935622
0.5735940940455564	-36.51644559984899
0.5742796681967325	-36.65723320292428
0.574965272255973	-36.798375447021186
0.5756509061129799	-36.93987277057858
0.5763365696579955	-37.081725612035086
0.5770222627818014	-37.223934409829184
0.577707985375713	-37.36649960239894
0.5783937373315778	-37.50942162818236
0.5790795185417711	-37.65270092561713
0.5797653288991935	-37.79633793314074
0.5804511682972675	-37.94033308919042
0.5811370366299342	-38.084686832203225
0.58182293379165	-38.22939960061593
0.582508859677384	-38.3744718328651
0.5831948141826144	-38.51990396738711
0.5838807972033255	-38.66569644261804
0.5845668086360052	-38.81184969699384
0.585252848377641	-38.95836416895017
0.5859389163257177	-39.10524029692251
0.5866250123782142	-39.252478519346106
0.5873111364336008	-39.40007927465599
0.5879972883908352	-39.54804300128699
0.5886834681493616	-39.696370137673725
0.5893696756091049	-39.845061122250556
0.5900559106704709	-39.994116393451684
0.5907421732343414	-40.14353638971108
0.591428463202072	-40.293321549462526
0.592114780475489	-40.443472311139566
0.5928011249568872	-40.59398911317555
0.5934874965490263	-40.74487239400363
0.5941738951551294	-40.8961225920568
0.5948603206788781	-41.047740145767705
0.5955467730244122	-41.199725493568934
0.5962332520963253	-41.35207907389284
0.596919757799663	-41.50480132517155
0.5976062900399198	-41.657892685837
0.5982928487230367	-41.81135359432095
0.5989794337553981	-41.96518448905494
0.5996660450438298	-42.11938580847031
0.6003526824955963	-42.27395799099829
0.6010393460183977	-42.428901475069765
0.6017260355203677	-42.58421669911554
0.6024127509100708	-42.73990410156621
0.6030994920965	-42.89596412085216
0.6037862589890739	-43.05239719540362
0.6044730514976349	-43.209203763650606
0.6051598695324455	-43.36638426402294
0.6058467130041874	-43.52393913495032
0.6065335818239579	-43.681868814862135
0.6072204759032679	-43.84017374218772
0.6079073951540396	-43.99885435535615
0.6085943394886041	-44.15791109279639
0.6092813088196987	-44.31734439293713
0.6099683030604647	-44.47715469420696
0.6106553221244453	-44.63734243503425
0.6113423659255836	-44.797908053847245
0.6120294343782189	-44.95885198907391
0.6127165273970857	-45.12017467914214
0.6134036448973114	-45.281876562479596
0.6140907867944132	-45.443958077513805
0.6147779530042967	-45.606419662672096
0.6154651434432534	-45.76926175638163
0.6161523580279583	-45.9324847970694
0.6168395966754676	-46.09608922316227
0.617526859303217	-46.2600754730868
0.6182141458290193	-46.42444398526956
0.6189014561710623	-46.589195198136835
0.6195887902479066	-46.7543295501148
0.6202761479784832	-46.919847479629425
0.6209635292820919	-47.08574942510655
0.6216509340783993	-47.252035824971834
0.6223383622874359	-47.41870711765078
0.623025813829595	-47.58576374156876
0.6237132886256296	-47.75320613515088
0.6244007865966513	-47.92103473682221
0.6250883076641286	-48.0892499850076
0.6257758517498831	-48.25785231813174
0.6264634187760896	-48.42684217461919
0.6271510086652723	-48.59621999289433
0.6278386213403044	-48.765986211381424
0.6285262567244052	-48.93614126850453
0.6292139147411384	-49.10668560268755
0.6299015953144101	-49.277619652354275
0.6305892983684669	-49.44894385592835
0.6312770238278945	-49.6206586518332
0.631964771617615	-49.79276447849217
0.6326525416628852	-49.96526177432842
0.6333403338892954	-50.138150977764994
0.6340281482227669	-50.31143252722475
0.6347159845895501	-50.48510686113039
0.6354038429162233	-50.659174417904524
0.6360917231296901	-50.83363563596956
0.6367796251571783	-51.008490953747796
0.6374675489262376	-51.18374080966138
0.6381554943647383	-51.3593856421323
0.6388434614008689	-51.53542588958244
0.6395314499631349	-51.711861990433476
0.6402194599803569	-51.88869438310705
0.6409074913816684	-52.06592350602452
0.6415955440965152	-52.24354979760721
0.6422836180546525	-52.42157369627625
0.6429717131861438	-52.599995640452704
0.643659829421359	-52.77881606855742
0.644347966690973	-52.95803541901115
0.645036124925964	-53.1376541302345
0.6457243040576114	-53.31767264064797
0.6464125040174945	-53.498091388671845
0.6471007247374908	-53.678910812726336
0.6477889661497745	-53.86013135123154
0.6484772281868152	-54.04175344260735
0.6491655107813752	-54.22377752527362
0.6498538138665088	-54.40620403764999
0.6505421373755607	-54.58903341815603
0.6512304812421643	-54.77226610521115
0.6519188454002398	-54.95590253723461
0.6526072297839932	-55.13994315264556
0.6532956343279145	-55.324388389863046
0.6539840589667759	-55.50923868730597
0.6546725036356306	-55.69449448339309
0.6553609682698117	-55.88015621654308
0.65604945280493	-56.06622432517445
0.6567379571768722	-56.252699247705586
0.6574264813218009	-56.43958142255479
0.6581150251761513	-56.62687128814017
0.6588035886766316	-56.81456928287979
0.6594921717602195	-57.00267584519152
0.6601807743641627	-57.191191413493186
0.6608693964259761	-57.38011642620242
0.6615580378834411	-57.569451321736786
0.6622466986746043	-57.75919653851368
0.6629353787377751	-57.94935251495047
0.663624078011525	-58.139919689464286
0.6643127964346867	-58.33089850047217
0.6650015339463518	-58.52228938639114
0.6656902904858698	-58.71409278563798
0.6663790659928472	-58.906309136629424
0.6670678604071449	-59.098938877782096
0.6677566736688785	-59.29198244751247
0.6684455057184155	-59.485440284236944
0.6691343564963748	-59.679312826371714
0.6698232259436252	-59.87360051233296
0.6705121140012841	-60.06830378053674
0.6712010206107157	-60.263423069398954
0.6718899457135309	-60.45895881733541
0.6725788892515849	-60.65491146276182
0.673267851166976	-60.85128144409377
0.6739568314020449	-61.04806919974673
0.6746458298993733	-61.24527516813611
0.6753348466017822	-61.442899787677106
0.6760238814523312	-61.64094349678493
0.6767129343943166	-61.83940673387458
0.6774020053712709	-62.038289937361036
0.6780910943269614	-62.23759354565911
0.6787802012053884	-62.437317997183534
0.6794693259507848	-62.63746373034892
0.6801584685076143	-62.83803118356985
0.6808476288205705	-63.03902079526064
0.6815368068345754	-63.24043300383562
0.6822260024947789	-63.442268247709016
0.6829152157465571	-63.644526965294936
0.6836044465355108	-63.84720959500736
0.6842936948074652	-64.0503165752602
0.684982960508468	-64.25384834446723
0.6856722435847891	-64.45780534104222
0.6863615439829182	-64.66218800339864
0.6870508616495649	-64.86699676995008
0.6877401965316569	-65.0722320791099
0.688429548576339	-65.27789436929137
0.6891189177309723	-65.48398407890774
0.6898083039431329	-65.69050164637207
0.6904977071606102	-65.89744751009741
0.6911871273314067	-66.1048221084966
0.6918765644037371	-66.31262587998255
0.6925660183260258	-66.52085926296787
0.6932554890469073	-66.7295226958652
0.6939449765152242	-66.93861661708709
0.6946344806800273	-67.14814146504595
0.6953240014905725	-67.35809767815411
0.6960135388963223	-67.56848569482382
0.6967030928469428	-67.77930595346722
0.6973926632923035	-67.9905588924964
0.6980822501824762	-68.20224495032325
0.6987718534677336	-68.41436456535966
0.6994614730985491	-68.62691817601743
0.7001511090255951	-68.83990622070824
0.7008407611997418	-69.0533291378437
0.7015304295720574	-69.26718736583526
0.7022201140938057	-69.48148134309442
0.702909814716446	-69.69621150803245
0.7035995313916316	-69.91137829906056
0.7042892640712092	-70.12698215458995
0.704979012707218	-70.34302351303167
0.7056687772518885	-70.55950281279668
0.7063585576576413	-70.77642049229587
0.7070483538770872	-70.99377698994005
0.7077381658630246	-71.21157274413991
0.70842799356844	-71.42980819330607
0.7091178369465068	-71.64848377584916
0.7098076959505832	-71.86759993017952
0.7104975705342134	-72.08715709470758
0.7111874606511246	-72.3071557078436
0.7118773662552272	-72.52759620799779
0.7125672873006141	-72.74847903358027
0.713257223741559	-72.96980462300107
0.7139471755325159	-73.19157341467017
0.7146371426281182	-73.41378584699747
0.7153271249831779	-73.63644235839264
0.7160171225526846	-73.85954338726549
0.716707135291805	-74.08308937202557
0.7173971631558811	-74.3070807510825
0.7180872061004303	-74.53151796284568
0.7187772640811443	-74.75640144572456
0.719467337053888	-74.9817316381284
0.720157424974699	-75.20750897846645
0.7208475277997858	-75.43373390514779
0.7215376454855287	-75.66040685658156
0.7222277779884773	-75.88752827117672
0.7229179252653506	-76.11509858734219
0.7236080872730362	-76.34311824348677
0.7242982639685887	-76.57158767801927
0.7249884553092296	-76.80050732934832
0.7256786612523465	-77.02987763588257
0.7263688817554921	-77.25969903603055
0.7270591167763829	-77.48997196820063
0.7277493662728994	-77.72069687080125
0.7284396302030847	-77.9518741822407
0.7291299085251434	-78.18350434092721
0.7298202011974421	-78.4155877852689
0.730510508178507	-78.64812495367389
0.7312008294270244	-78.88111628455017
0.7318911649018393	-79.11456221630571
0.7325815145619542	-79.34846318734829
0.7332718783665297	-79.58281963608572
0.7339622562748829	-79.81763200092568
0.734652648246486	-80.0529007202759
0.7353430542409671	-80.28862623254389
0.7360334742181083	-80.52480897613712
0.736723908137845	-80.7614493894631
0.737414355960266	-80.99854791092915
0.7381048176456116	-81.2361049789425
0.7387952931542742	-81.47412103191043
0.7394857824467961	-81.71259650824007
0.7401762854838705	-81.95153184633845
0.7408668022263389	-82.19092748461264
0.7415573326351922	-82.43078386146954
0.7422478766715683	-82.67110141531603
0.7429384342967531	-82.9118805845589
0.7436290054721786	-83.15312180760495
0.7443195901594222	-83.39482552286076
0.7450101883202066	-83.63699216873295
0.7457007999163993	-83.87962218362807
0.746391424910011	-84.12271600595257
0.7470820632631956	-84.36627407411284
0.7477727149382496	-84.61029682651524
0.7484633798976106	-84.85478470156602
0.7491540581038579	-85.09973813767142
0.7498447495197106	-85.34515757323751
0.7505354541080279	-85.59104344667043
0.751226171831808	-85.83739619637606
0.7519169026541871	-86.08421626076048
0.7526076465384397	-86.33150407822953
0.7532984034479773	-86.579260087189
0.7539891733463476	-86.82748472604463
0.7546799561972345	-87.07617843320222
0.7553707519644566	-87.32534164706722
0.7560615606119676	-87.57497480604528
0.756752382103855	-87.82507834854192
0.7574432164043394	-88.07565271296257
0.7581340634777747	-88.32669833771256
0.758824923288646	-88.57821566119726
0.7595157958015707	-88.8302051218219
0.7602066809812967	-89.08266715799165
0.7608975787927025	-89.33560220811174
0.7615884892007957	-89.58901071058709
0.7622794121707134	-89.84289310382283
0.762970347667721	-90.09724982622384
0.7636612956572123	-90.35208131619505
0.7643522561047078	-90.60738801214129
0.7650432289758547	-90.8631703524673
0.7657342142364267	-91.11942877557786
0.7664252118523234	-91.37616371987761
0.7671162217895682	-91.63337562377109
0.7678072440143099	-91.89106492566286
0.7684982784928208	-92.14923206395743
0.7691893251914969	-92.4078774770592
0.769880384076856	-92.66700160337255
0.7705714551155393	-92.92660488130181
0.7712625382743084	-93.1866877492512
0.7719536335200468	-93.44725064562496
0.772644740819758	-93.70829400882717
0.7733358601405654	-93.96981827726191
0.7740269914497127	-94.23182388933327
0.7747181347145612	-94.49431128344519
0.7754092899025915	-94.7572808980016
0.7761004569814013	-95.02073317140632
0.7767916359187061	-95.28466854206319
0.7774828266823379	-95.54908744837599
0.7781740292402451	-95.81399032874842
0.7788652435604911	-96.07937762158406
0.7795564696112552	-96.34524976528651
0.7802477073608312	-96.61160719825934
0.7809389567776266	-96.87845035890604
0.7816302178301632	-97.14577968562999
0.7823214904870751	-97.41359561683463
0.7830127747171096	-97.68189859092325
0.7837040704891263	-97.95068904629919
0.7843953777720953	-98.21996742136555
0.7850866965350988	-98.48973415452554
0.7857780267473291	-98.75998968418229
0.7864693683780887	-99.03073444873887
0.78716072139679	-99.30196888659827
0.7878520857729544	-99.5736934361635
0.7885434614762113	-99.8459085358374
0.7892348484762993	-100.11861462402292
0.7899262467430636	-100.39181213912278
0.7906176562464574	-100.66550151953977
0.7913090769565403	-100.93968320367658
0.7920005088434782	-101.2143576299359
0.7926919518775424	-101.48952523672034
0.79338340602911	-101.76518646243242
0.7940748712686629	-102.0413417454747
0.7947663475667873	-102.31799152424959
0.7954578348941731	-102.5951362371596
0.7961493332216136	-102.87277632260698
0.7968408425200054	-103.15091221899408
0.7975323627603477	-103.42954436472314
0.7982238939137414	-103.70867319819644
0.7989154359513895	-103.9882991578161
0.7996069888445958	-104.2684226819843
0.8002985525647649	-104.54904420910304
0.8009901270834022	-104.83016417757445
0.8016817123721123	-105.11178302580042
0.8023733084025997	-105.39390119218291
0.8030649151466674	-105.67651911512378
0.8037565325762177	-105.95963723302498
0.8044481606632504	-106.24325598428815
0.8051397993798634	-106.52737580731514
0.8058314486982516	-106.81199714050763
0.8065231085907072	-107.09712042226732
0.8072147790296179	-107.38274609099574
0.8079064599874687	-107.66887458509449
0.8085981514368392	-107.9555063429651
0.8092898533504047	-108.24264180300905
0.809981565700935	-108.53028140362775
0.8106732884612944	-108.81842558322263
0.8113650216044413	-109.10707478019499
0.8120567651034274	-109.39622943294611
0.8127485189313977	-109.68588997987736
0.8134402830615894	-109.97605685938983
0.8141320574673332	-110.26673050988471
0.8148238421220508	-110.55791136976313
0.8155156369992557	-110.84959987742621
0.8162074420725526	-111.14179647127493
0.8168992573156368	-111.4345015897103
0.8175910827022945	-111.72771567113332
0.8182829182064013	-112.02143915394491
0.8189747638019227	-112.31567247654581
0.8196666194629131	-112.61041607733692
0.8203584851635161	-112.90567039471905
0.8210503608779637	-113.20143586709291
0.8217422465805759	-113.49771293285922
0.8224341422457605	-113.79450203041858
0.8231260478480122	-114.09180359817171
0.8238179633619135	-114.38961807451913
0.8245098887621325	-114.68794589786133
0.8252018240234243	-114.98678750659882
0.8258937691206296	-115.28614333913208
0.8265857240286745	-115.58601383386151
0.8272776887225699	-115.88639942918746
0.8279696631774124	-116.18730056351033
0.8286616473683822	-116.48871767523036
0.829353641270744	-116.79065120274778
0.8300456448598457	-117.09310158446287
0.8307376581111188	-117.39606925877574
0.831429681000078	-117.69955466408653
0.8321217135023202	-118.00355823879535
0.8328137555935254	-118.30808042130222
0.8335058072494546	-118.61312165000719
0.8341978684459506	-118.91868236331024
0.8348899391589379	-119.22476299961133
0.8355820193644218	-119.53136399731035
0.8362741090384878	-119.83848579480707
0.8369662081573017	-120.14612883050138
0.8376583166971097	-120.45429354279308
0.8383504346342372	-120.76298037008189
0.8390425619450889	-121.07218975076754
0.839734698606148	-121.3819221232497
0.8404268445939769	-121.69217792592798
0.8411189998852162	-122.00295759720203
0.8418111644565839	-122.31426157547133
0.842503338284876	-122.62609029913548
0.8431955213469657	-122.93844420659389
0.8438877136198031	-123.25132373624609
0.8445799150804149	-123.56472932649143
0.8452721257059043	-123.87866141572933
0.8459643454734501	-124.1931204423591
0.8466565743603076	-124.50810684478013
0.8473488123438063	-124.82362106139152
0.8480410594013515	-125.13966353059261
0.8487333155104234	-125.4562346907826
0.8494255806485762	-125.77333498036063
0.8501178547934383	-126.09096483772586
0.8508101379227119	-126.4091247012773
0.8515024300141733	-126.7278150094141
0.852194731045671	-127.04703620053525
0.8528870409951274	-127.36678871303978
0.8535793598405368	-127.6870729853265
0.854271687559966	-128.00788945579444
0.8549640241315541	-128.32923856284245
0.8556563695335118	-128.6511207448694
0.8563487237441212	-128.97353644027407
0.8570410867417352	-129.29648608745524
0.857733458504778	-129.6199701248117
0.8584258390117445	-129.94398899074224
0.8591182282411993	-130.26854312364534
0.8598106261717773	-130.59363296191972
0.860503032782183	-130.91925894396405
0.8611954480511905	-131.2454215081769
0.861887871957643	-131.57212109295676
0.8625803044804524	-131.89935813670215
0.8632727455985992	-132.22713307781163
0.8639651952911325	-132.55544635468362
0.8646576535371687	-132.8842984057165
0.8653501203158928	-133.21368966930856
0.8660425956065565	-133.54362058385829
0.8667350793884795	-133.87409158776398
0.8674275716410476	-134.2051031194239
0.8681200723437136	-134.5366556172363
0.8688125814759969	-134.86874951959945
0.869505099017483	-135.20138526491147
0.8701976249478228	-135.5345632915706
0.8708901592467331	-135.8682840379749
0.8715827018939958	-136.20254794252244
0.8722752528694584	-136.53735544361135
0.8729678121530327	-136.8727069796396
0.8736603797246948	-137.20860298900527
0.874352955564486	-137.54504391010627
0.8750455396525105	-137.8820301813406
0.8757381319689374	-138.2195622411062
0.8764307324939984	-138.55764052780083
0.8771233412079886	-138.8962654798224
0.8778159580912666	-139.2354375355687
0.8785085831242531	-139.57515713343759
0.8792012162874318	-139.91542471182677
0.8798938575613485	-140.25624070913398
0.880586506926611	-140.59760556375693
0.8812791643638888	-140.93951971409336
0.8819718298539125	-141.28198359854082
0.8826645033774752	-141.62499765549686
0.8833571849154295	-141.96856232335918
0.8840498744486899	-142.31267804052527
0.8847425719582308	-142.65734524539266
0.8854352774250872	-143.00256437635892
0.8861279908303543	-143.34833587182143
0.8868207121551865	-143.69466017017766
0.8875134413807987	-144.0415377098251
0.8882061784884642	-144.38896892916094
0.888898923459516	-144.73695426658267
0.8895916762753461	-145.0854941604875
0.8902844369174044	-145.4345890492729
0.8909772053672002	-145.78423937133599
0.8916699816063002	-146.13444556507397
0.8923627656163295	-146.48520806888428
0.8930555573789709	-146.8365273211639
0.8937483568759644	-147.18840376031008
0.8944411640891077	-147.54083782471983
0.895133979000255	-147.89382995279036
0.8958268015913182	-148.24738058291874
0.8965196318442649	-148.60149015350194
0.8972124697411197	-148.95615910293702
0.8979053152639631	-149.31138786962103
0.8985981683949317	-149.6671768919509
0.8992910291162175	-150.02352660832346
0.8999838974100686	-150.38043745713574
0.9006767732587878	-150.73790987678456
0.9013696566447333	-151.0959443056668
0.9020625475503182	-151.45454118217933
0.9027554459580103	-151.81370094471893
0.9034483518503315	-152.17342403168232
0.9041412652098582	-152.53371088146628
0.904834186019221	-152.8945619324677
0.9055271142611038	-153.255977623083
0.9062200499182446	-153.61795839170895
0.9069129929734346	-153.9805046767423
0.9076059434095182	-154.34361691657958
0.9082989012093925	-154.7072955496174
0.908991866356008	-155.07154101425232
0.9096848388323676	-155.43635374888095
0.9103778186215263	-155.8017341918998
0.9110708057065912	-156.16768278170528
0.9117638000707217	-156.5341999566939
0.9124568016971288	-156.90128615526208
0.9131498105690754	-157.2689418158063
0.9138428266698754	-157.63716737672294
0.9145358499828938	-158.00596327640835
0.915228880491547	-158.37532995325884
0.9159219181793021	-158.74526784567087
0.9166149630296765	-159.11577739204057
0.9173080150262382	-159.48685903076424
0.9180010741526053	-159.8585132002382
0.9186941403924461	-160.23074033885862
0.9193872137294787	-160.60354088502172
0.920080294147471	-160.97691527712365
0.9207733816302396	-161.3508639535606
0.9214664761616513	-161.72538735272866
0.9221595777256216	-162.10048591302404
0.9228526863061144	-162.47616007284265
0.9235458018871433	-162.8524102705806
0.9242389244527696	-163.22923694463398
0.9249320539871034	-163.60664053339875
0.9256251904743025	-163.9846214752709
0.9263183338985731	-164.36318020864638
0.927011484244169	-164.7423171719212
0.9277046414953918	-165.12203280349124
0.9283978056365901	-165.50232754175235
0.92909097665216	-165.8832018251004
0.929784154526545	-166.2646560919313
0.9304773392442348	-166.6466907806408
0.9311705307897664	-167.02930632962472
0.9318637291477232	-167.4125031772789
0.9325569343027346	-167.796281761999
0.9332501462394768	-168.1806425221809
0.9339433649426715	-168.56558589622017
0.9346365903970866	-168.95111232251253
0.9353298225875353	-169.3372222394536
0.9360230614988766	-169.72391608543916
0.936716307116015	-170.11119429886475
0.9374095594238998	-170.49905731812598
0.9381028184075253	-170.88750558161843
0.9387960840519308	-171.27653952773758
0.9394893563422003	-171.66615959487916
0.9401826352634621	-172.05636622143845
0.9408759208008889	-172.44715984581114
0.9415692129396976	-172.83854090639255
0.9422625116651494	-173.23050984157817
0.9429558169625484	-173.6230670897635
0.9436491288172436	-174.0162130893438
0.9443424472146265	-174.40994827871464
0.9450357721401327	-174.80427309627134
0.9457291035792402	-175.1991879804091
0.9464224415174706	-175.59469336952338
0.9471157859403885	-175.99078970200938
0.9478091368336008	-176.38747741626247
0.9485024941827569	-176.78475695067786
0.9491958579735491	-177.1826287436508
0.9498892281917113	-177.58109323357652
0.9505826048230203	-177.98015085885035
0.9512759878532939	-178.37980205786712
0.9519693772683921	-178.78004726902228
0.9526627730542169	-179.1808869307108
0.953356175196711	-179.58232148132794
0.954049583681859	-179.9843513592687
0.9547429984956866	-180.38697700292818
0.9554364196242603	-180.79019885070144
0.9561298470536873	-181.1940173409835
0.9568232807701161	-181.59843291216947
0.9575167207597354	-182.00344600265421
0.9582101670087741	-182.40905705083276
0.9589036195035019	-182.81526649510002
0.9595970782302279	-183.222074773851
0.960290543175302	-183.62948232548058
0.9609840143251136	-184.03748958838366
0.9616774916660914	-184.44609700095512
0.9623709751847043	-184.85530500158993
0.9630644648674597	-185.26511402868272
0.9637579607009051	-185.67552452062841
0.9644514626716271	-186.08653691582182
0.9651449707662505	-186.4981516526577
0.9658384849714396	-186.91036916953087
0.9665320052738972	-187.323189904836
0.9672255316603645	-187.73661429696784
0.9679190641176216	-188.1506427843212
0.968612602632486	-188.56527580529058
0.9693061471918142	-188.98051379827075
0.9699996977825	-189.39635720165631
0.9706932543914756	-189.812806453842
0.9713868170057105	-190.22986199322233
0.9720803856122122	-190.64752425819194
0.9727739601980253	-191.0657936871454
0.9734675407502317	-191.48467071847722
0.9741611272559508	-191.90415579058214
0.9748547197023387	-192.3242493418544
0.9755483180765885	-192.74495181068863
0.9762419223659302	-193.1662636354793
0.9769355325576304	-193.58818525462095
0.9776291486389922	-194.0107171065079
0.978322770597355	-194.43385962953468
0.9790163984200944	-194.8576132620957
0.9797100320946225	-195.2819784425854
0.9804036716083869	-195.70695560939802
0.9810973169488714	-196.13254520092798
0.9817909681035955	-196.55874765556962
0.982484625060114	-196.98556341171735
0.9831782878060178	-197.41299290776536
0.9838719563289324	-197.84103658210796
0.9845656306165194	-198.26969487313954
0.9852593106564747	-198.6989682192543
0.9859529964365294	-199.1288570588464
0.9866466879444498	-199.55936183031008
0.9873403851680363	-199.99048297203953
0.9880340880951248	-200.42222092242903
0.9887277967135851	-200.85457611987275
0.9894215110113213	-201.28754900276476
0.9901152309762719	-201.7211400094992
0.9908089565964094	-202.15534957847035
0.991502687859741	-202.5901781480722
0.9921964247543066	-203.02562615669868
0.9928901672681806	-203.46169404274409
0.9935839153894709	-203.8983822446024
0.9942776691063192	-204.3356912006676
0.9949714284069	-204.7736213493338
0.9956651932794218	-205.21217312899495
0.9963589637121256	-205.65134697804504
0.997052739693286	-206.09114333487818
0.99774652121121	-206.53156263788807
0.9984403082542379	-206.9726053254688
0.9991341008107426	-207.41427183601428
0.9998278988691294	-207.8565626079184
1.0005217024178363	-208.29947807957507
1.0012155114453336	-208.74301868937815
1.0019093259401235	-209.18718487572147
1.0026031458907414	-209.63197707699905
1.0032969712857533	-210.07739573160444
1.003990802113758	-210.5234412779316
1.004684638363386	-210.97011415437427
1.0053784800232997	-211.41741479932637
1.006072327082192	-211.86534365118152
1.006766179528789	-212.3139011483335
1.0074600373518465	-212.7630877291761
1.0081539005401527	-213.212903832103
1.0088477690825268	-213.66334989550793
1.0095416429678181	-214.11442635778448
1.010235522184908	-214.56613365732642
1.010929406722708	-215.01847223252736
1.0116232965701606	-215.47144252178097
1.0123171917162388	-215.92504496348084
1.0130110921499467	-216.37927999602064
1.0137049978603179	-216.8341480577939
1.0143989088364167	-217.28964958719433
1.0150928250673374	-217.74578502261537
1.0157867465422044	-218.20255480245055
1.0164806732501728	-218.65995936509353
1.0171746051804267	-219.11799914893768
1.0178685423221803	-219.57667459237663
1.0185624846646775	-220.03598613380385
1.019256432197192	-220.49593421161273
1.0199503849090261	-220.95651926419697
1.0206443427895124	-221.41774172994974
1.021338305828013	-221.87960204726463
1.0220322740139176	-222.34210065453493
1.0227262473366467	-222.80523799015418
1.023420225785649	-223.26901449251574
1.0241142093504016	-223.73343060001298
1.0248081980204118	-224.19848675103918
1.0255021917852138	-224.66418338398785
1.0261961906343717	-225.1305209372523
1.0268901945574778	-225.59749984922567
1.0275842035441523	-226.06512055830143
1.028278217584044	-226.53338350287282
1.02897223666683	-227.0022891213331
1.0296662607822151	-227.47183785207554
1.030360289919933	-227.9420301334934
1.031054324069744	-228.41286640398
1.0317483632214377	-228.88434710192848
1.0324424073648297	-229.356472665732
1.0331364564897645	-229.82924353378388
1.033830510586114	-230.30266014447716
1.034524569643777	-230.77672293620512
1.0352186336526799	-231.25143234736086
1.0359127026027763	-231.72678881633752
1.0366067764840474	-232.20279278152827
1.0373008552865008	-232.67944468132626
1.0379949390001715	-233.1567449541244
1.0386890276151208	-233.63469403831596
1.039383121121438	-234.1132923722939
1.0400772195092378	-234.59254039445136
1.040771322768662	-235.0724385431814
1.0414654308898792	-235.55298725687697
1.042159543863084	-236.03418697393118
1.0428536616784976	-236.516038132737
1.0435477843263676	-236.9985411716875
1.0442419117969675	-237.48169652917548
1.0449360440805966	-237.96550464359404
1.045630181167581	-238.44996595333603
1.0463243230482717	-238.93508089679455
1.0470184697130462	-239.4208499123624
1.0477126211523082	-239.90727343843255
1.048406777356486	-240.39435191339788
1.049100938316034	-240.8820857756515
1.0497951040214315	-241.3704754635859
1.050489274463184	-241.8595214155942
1.051183449631822	-242.34922407006914
1.0518776295179013	-242.83958386540363
1.0525718141120026	-243.33060123999047
1.0532660034047319	-243.8222766322225
1.0539601973867196	-244.31461048049252
1.0546543960486219	-244.80760322319338
1.0553485993811191	-245.3012552987177
1.0560428073749168	-245.79556714545836
1.0567370200207447	-246.2905392018081
1.057431237309357	-246.78617190615958
1.0581254592315332	-247.2824656969057
1.0588196857780763	-247.779421012439
1.059513916939814	-248.2770382911523
1.0602081527075977	-248.7753179714383
1.0609023930723045	-249.27426049168966
1.061596638024834	-249.773866290299
1.0622908875561101	-250.27413580565897
1.0629851416570812	-250.7750694761623
1.0636794003187187	-251.2766677402015
1.064373663532019	-251.77893103616935
1.065067931288001	-252.2818598024583
1.0657622035777077	-252.7854544774611
1.0664564803922054	-253.2897154995703
1.0671507617225842	-253.79464330717835
1.0678450475599575	-254.30023833867787
1.0685393378954615	-254.80650103246157
1.0692336327202563	-255.31343182692174
1.069927932025525	-255.82103116045107
1.0706222358024733	-256.329299471442
1.0713165440423305	-256.8382371982872
1.0720108567363482	-257.34784477937893
1.0727051738758013	-257.85812265310983
1.0733994954519874	-258.36907125787224
1.074093821456227	-258.8806910320587
1.0747881518798628	-259.3929824140617
1.0754824867142596	-259.9059458422735
1.0761768259508062	-260.4195817550869
1.0768711695809126	-260.9338905908939
1.0775655175960108	-261.44887278808704
1.0782598699875572	-261.96452878505886
1.0789542267470273	-262.48085902020154
1.0796485878659208	-262.9978639319076
1.0803429533357591	-263.51554395856925
1.0810373231480848	-264.033899538579
1.081731697294464	-264.5529311103291
1.0824260757664828	-265.07263911221185
1.0831204585557501	-265.5930239826196
1.0838148456538967	-266.11408615994475
1.0845092370525733	-266.63582608257946
1.0852036327434547	-267.15824418891594
1.0858980327182353	-267.68134091734663
1.0865924369686315	-268.20511670626377
1.0872868454863815	-268.72957199405954
1.0879812582632438	-269.2547072191262
1.0886756752909985	-269.780522819856
1.0893700965614477	-270.3070192346412
1.090064522066413	-270.83419690187395
1.090758951797738	-271.36205625994637
1.0914533857472875	-271.8905977472508
1.0921478239069462	-272.41982180217923
1.0928422662686201	-272.94972886312405
1.0935367128242364	-273.4803193684773
1.0942311635657418	-274.0115937566311
1.094925618485105	-274.54355246597765
1.0956200775743141	-275.076195934909
1.0963145408253783	-275.6095246018173
1.0970090082303268	-276.14353890509466
1.097703479781209	-276.6782392831332
1.0983979554700958	-277.213626174325
1.0990924352890767	-277.74970001706197
1.0997869192302625	-278.2864612497365
1.1004814072857834	-278.8239103107403
1.1011758994477896	-279.36204763846575
1.101870395708452	-279.90087367130457
1.1025648960599606	-280.44038884764893
1.1032594004945253	-280.9805936058908
1.1039539090043764	-281.52148838442224
1.1046484215817631	-282.0630736216352
1.105342938218955	-282.6053497559216
1.1060374589082407	-283.1483172256736
1.1067319836419283	-283.6919764692831
1.1074265124123457	-284.23632792514195
1.10812104521184	-284.78137203164215
1.1088155820327779	-285.3271092271756
1.1095101228675446	-285.8735399501342
1.1102046677085455	-286.42066463890995
1.1108992165482048	-286.9684837318949
1.111593769378965	-287.51699766748055
1.1122883261932892	-288.06620688405917
1.112982886983658	-288.61611182002235
1.1136774517425714	-289.1667129137621
1.1143720204625485	-289.71801060367034
1.115066593136127	-290.27000532813884
1.1157611697558631	-290.8226975255593
1.1164557503143324	-291.3760876343238
1.1171503348041283	-291.93017609282396
1.117844923217863	-292.4849633394517
1.1185395155481677	-293.04044981259904
1.119234111787691	-293.59663595065723
1.119928711929101	-294.1535221920185
1.1206233159650831	-294.7111089750744
1.121317923888342	-295.26939673821676
1.1220125356915998	-295.82838591983744
1.122707151367597	-296.38807695832816
1.1234017709090922	-296.9484702920803
1.1240963943088624	-297.5095663594861
1.1247910215597017	-298.0713655989369
1.1254856526544232	-298.63386844882467
1.126180287585857	-299.1970753475409
1.1268749263468516	-299.76098673347747
1.1275695689302732	-300.325603045026
1.1282642153290048	-300.8909247205779
1.1289588655359486	-301.45695219852536
1.129653519544023	-302.0236859172596
1.130348177346165	-302.59112631517246
1.131042838935328	-303.1592738306554
1.1317375043044842	-303.7281289021003
1.1324321734466214	-304.2976919678986
1.133126846354747	-304.8679634664422
1.1338215230218835	-305.4389438361223
1.1345162034410718	-306.01063351533054
1.1352108876053697	-306.58303294245894
1.135905575507852	-307.15614255589844
1.1366002671416109	-307.7299627940411
1.137294962499755	-308.30449409527824
1.137989661575411	-308.8797368980016
1.138684364361721	-309.4556916406027
1.1393790708518445	-310.0323587614727
1.1400737810389592	-310.60973869900363
1.1407684949162569	-311.18783189158654
1.1414632124769486	-311.76663877761354
1.1421579337142598	-312.34615979547544
1.142852658621435	-312.92639538356434
1.143547387191733	-313.50734598027117
1.14424211941843	-314.0890120239879
1.1449368552948198	-314.6713939531059
1.1456315948142095	-315.25449220601615
1.146326337969926	-315.8383072211107
1.1470210847553106	-316.42283943678063
1.147715835163721	-317.0080892914176
1.1484105891885317	-317.59405722341273
1.1491053468231323	-318.18074367115787
1.1498001080609295	-318.76814907304396
1.1504948728953464	-319.35627386746285
1.1511896413198206	-319.94511849280576
1.1518844133278063	-320.53468338746376
1.1525791889127743	-321.1249689898287
1.15327396806821	-321.71597573829155
1.1539687507876166	-322.3077040712442
1.1546635370645102	-322.90015442707727
1.1553583268924255	-323.4933272441828
1.1560531202649107	-324.0872229609518
1.1567479171755304	-324.6818420157755
1.1574427176178657	-325.2771848470455
1.158137521585511	-325.87325189315266
1.1588323290720786	-326.470043592489
1.1595271400711946	-327.067560383445
1.1602219545765011	-327.6658027044126
1.1609167725816556	-328.2647709937827
1.1616115940803304	-328.86446568994694
1.162306419066214	-329.46488723129625
1.1630012475330087	-330.0660360562218
1.163696079474433	-330.6679126031152
1.1643909148842206	-331.27051731036744
1.1650857537561192	-331.8738506163699
1.165780596083892	-332.4779129595136
1.1664754418613188	-333.0827047781902
1.1671702910821915	-333.6882265107903
1.1678651437403187	-334.2944785957057
1.1685599998295233	-334.90146147132725
1.1692548593436434	-335.509175576046
1.169949722276531	-336.1176213482536
1.1706445886220533	-336.7267992263407
1.171339458374093	-337.336709648699
1.1720343315265453	-337.94735305371916
1.172729208073323	-338.5587298797928
1.1734240880083502	-339.1708405653108
1.1741189713255673	-339.7836855486642
1.1748138580189293	-340.3972652682443
1.1755087480824042	-341.01158016244216
1.1762036415099768	-341.62663066964893
1.176898538295643	-342.24241722825565
1.1775934384334155	-342.85894027665364
1.1782883419173202	-343.47620025323357
1.1789832487413974	-344.09419759638706
1.1796781588997018	-344.7129327445049
1.1803730723863013	-345.332406135978
1.1810679891952787	-345.9526182091977
1.1817629093207307	-346.5735694025548
1.1824578327567679	-347.1952601544407
1.1831527594975142	-347.8176909032461
1.183847689537109	-348.4408620873624
1.1845426228697034	-349.06477414518025
1.1852375594894644	-349.689427515091
1.1859324993905713	-350.3148226354855
1.1866274425672174	-350.9409599447545
1.1873223890136109	-351.5678398812896
1.1880173387239714	-352.1954628834812
1.1887122916925346	-352.8238293897207
1.1894072479135473	-353.4529398383988
1.1901022073812724	-354.08279466790674
1.190797170089984	-354.71339431663534
1.1914921360339708	-355.3447392229755
1.1921871052075352	-355.97682982531836
1.192882077604992	-356.6096665620545
1.19357705322067	-357.2432498715753
1.1942720320489113	-357.87758019227147
1.194967014084071	-358.51265796253404
1.1956619993205173	-359.1484836207536
1.1963569877526319	-359.78505760532164
1.1970519793748096	-360.4223803546288
1.197746974181458	-361.06045230706553
1.1984419721669979	-361.69927390102333
1.1991369733258637	-362.33884557489273
1.1998319776525017	-362.979167767065
1.200526985141372	-363.62024091593054
1.2012219957869477	-364.26206545988055
1.2019170095837135	-364.9046418373059
1.2026120265261686	-365.54797048659697
1.203307046608824	-366.1920518461454
1.2040020698262037	-366.83688635434123
1.2046970961728445	-367.48247444957576
1.2053921256432956	-368.12881657023974
1.2060871582321193	-368.775913154724
1.2067821939338899	-369.4237646414191
1.207477232743195	-370.0723714687162
1.2081722746546348	-370.72173407500605
1.2088673196628203	-371.37185289867915
1.2095623677623777	-372.0227283781267
1.2102574189479427	-372.674360951739
1.2109524732141663	-373.32675105790736
1.2116475305557097	-373.9798991350221
1.2123425909672472	-374.63380562147427
1.2130376544434656	-375.2884709556544
1.2137327209790634	-375.9438955759536
1.214427790568752	-376.6000799207623
1.2151228632072544	-377.25702442847114
1.2158179388893056	-377.91472953747126
1.2165130176096537	-378.57319568615287
1.2172080993630576	-379.23242331290714
1.2179031841442893	-379.8924128561245
1.2185982719481325	-380.5531647541959
1.2192933627693825	-381.2146794455121
1.219988456602847	-381.87695736846325
1.220683553443345	-382.5399989614405
1.221378653285708	-383.20380466283433
1.2220737561247799	-383.8683749110358
1.2227688619554142	-384.53371014443496
1.2234639707724788	-385.1998108014231
1.224159082570851	-385.8666773203903
1.2248541973454221	-386.5343101397277
1.2255493150910937	-387.20270969782575
1.2262444358027784	-387.87187643307493
1.2269395594754018	-388.5418107838662
1.2276346861039005	-389.2125131885897
1.2283298156832225	-389.8839840856367
1.229024948208328	-390.55622391339716
1.229720083674187	-391.2292331102624
1.2304152220757834	-391.90301211462224
1.23111036340811	-392.57756136486796
1.231805507666173	-393.2528812993899
1.2325006548449884	-393.92897235657836
1.2331958049395846	-394.60583497482435
1.2338909579450008	-395.28346959251803
1.2345861138562875	-395.96187664805046
1.235281272668506	-396.64105657981173
1.23597643437673	-397.321009826193
1.2366715989760433	-398.00173682558426
1.2373667664615409	-398.68323801637604
1.2380619368283288	-399.3655138369594
1.2387571100715247	-400.0485647257242
1.2394522861862571	-400.7323911210616
1.2401474651676647	-401.4169934613616
1.2408426470108984	-402.1023721850152
1.241537831711119	-402.78852773041257
1.242233019263499	-403.47546053594436
1.2429282096632213	-404.16317104000115
1.2436234029054793	-404.85165968097306
1.2443185989854786	-405.5409268972511
1.2450137978984335	-406.2309731272253
1.245708999639571	-406.92179880928643
1.2464042042041277	-407.61340438182475
1.247099411587351	-408.3057902832311
1.247794621784499	-408.9989569518955
1.2484898347908417	-409.6929048262087
1.2491850506016575	-410.38763434456104
1.2498802692122364	-411.0831459453428
1.2505754906178794	-411.77944006694486
1.2512707148138973	-412.4765171477571
1.2519659417956122	-413.17437762617044
1.252661171558355	-413.8730219405748
1.2533564040974698	-414.5724505293614
1.254051639408308	-415.27266383092
1.2547468774862334	-415.973662283641
1.2554421183266193	-416.6754463259151
1.2561373619248495	-417.3780163961324
1.2568326082763186	-418.0813729326838
1.2575278573764304	-418.78551637395896
1.2582231092206	-419.49044715834896
1.2589183638042512	-420.1961657242436
1.2596136211228202	-420.90267251003377
1.2603088811717515	-421.6099679541096
1.2610041439465	-422.3180524948611
1.2616994094425316	-423.0269265706793
1.262394677655321	-423.7365906199539
1.263089948580354	-424.44704508107594
1.2637852222131256	-425.15829039243494
1.2644804985491411	-425.8703269924221
1.2651757775839159	-426.5831553194269
1.2658710593129756	-427.2967758118406
1.2665663437318544	-428.01118890805276
1.2672616308360976	-428.7263950464538
1.26795692062126	-429.4423946654344
1.2686522130829059	-430.1591882033843
1.2693475082166101	-430.87677609869445
1.270042806017956	-431.59515878975463
1.270738106482538	-432.3143367149555
1.2714334096059594	-433.0343103126873
1.2721287153838325	-433.75508002133984
1.272824023811782	-434.47664627930396
1.2735193348854383	-435.1990095249695
1.274214648600445	-435.92217019672717
1.2749099649524525	-436.6461287329667
1.2756052839371228	-437.370885572079
1.2763006055501258	-438.0964411524537
1.276995929787142	-438.82279591248147
1.2776912566438612	-439.54995029055243
1.2783865861159818	-440.27790472505643
1.2790819181992126	-441.0066596543844
1.2797772528892712	-441.73621551692594
1.2804725901818854	-442.4665727510717
1.2811679300727907	-443.19773179521155
1.2818632725577335	-443.92969308773604
1.2825586176324686	-444.66245706703506
1.2832539652927608	-445.39602417149916
1.283949315534383	-446.13039483951843
1.2846446683531185	-446.86556950948255
1.2853400237447592	-447.6015486197826
1.2860353817051053	-448.33833260880783
1.2867307422299685	-449.07592191494916
1.287426105315167	-449.8143169765964
1.2881214709565303	-450.5535182321399
1.2888168391498946	-451.2935261199698
1.289512209891107	-452.03434107847585
1.2902075831760231	-452.77596354604884
1.2909029590005072	-453.5183939610784
1.2915983373604334	-454.2616327619551
1.292293718251683	-455.0056803870686
1.292989101670148	-455.75053727480963
1.2936844876117286	-456.4962038635677
1.2943798760723335	-457.2426805917335
1.2950752670478811	-457.98996789769683
1.2957706605342973	-458.73806621984767
1.2964660565275181	-459.4869759965766
1.297161455023488	-460.236697666273
1.2978568560181596	-460.98723166732805
1.2985522595074945	-461.73857843813056
1.2992476654874636	-462.4907384170718
1.2999430739540454	-463.243712042541
1.3006384849032284	-463.99749975292895
1.3013338983310083	-464.7521019866253
1.3020293142333905	-465.5075191820199
1.302724732606388	-466.2637517775035
1.3034201534460232	-467.02080021146537
1.3041155767483272	-467.7786649222963
1.3048110025093382	-468.5373463483858
1.3055064307251047	-469.29684492812453
1.3062018613916824	-470.05716109990203
1.3068972945051356	-470.81829530210825
1.307592730061538	-471.5802479731338
1.30828816805697	-472.3430195513682
1.3089836084875226	-473.1066104752018
1.3096790513492922	-473.87102118302425
1.3103744966383868	-474.6362521132262
1.3110699443509202	-475.4023037041968
1.3117653944830159	-476.169176394327
1.3124608470308052	-476.9368706220063
1.3131563019904269	-477.70538682562454
1.3138517593580294	-478.4747254435723
1.3145472191297685	-479.2448869142389
1.3152426813018085	-480.01587167601485
1.315938145870321	-480.78768016728986
1.3166336128314875	-481.56031282645404
1.3173290821814954	-482.33377009189735
1.318024553916542	-483.10805240200983
1.318720028032832	-483.8831601951815
1.3194155045265776	-484.6590939098018
1.320110983394	-485.4358539842616
1.3208064646313273	-486.21344085694994
1.3215019482347974	-486.9918549662574
1.322197434200654	-487.77109675057363
1.3228929225251502	-488.5511666482889
1.3235884132045466	-489.33206509779296
1.324283906235111	-490.11379253747543
1.3249794016131209	-490.8963494057267
1.325674899334859	-491.67973614093637
1.326370399396619	-492.4639531814949
1.3270659017946995	-493.24900096579137
1.3277614065254084	-494.0348799322166
1.3284569135850617	-494.82159051915977
1.329152422969982	-495.60913316501143
1.3298479346765006	-496.3975083081611
1.3305434487009555	-497.1867163869985
1.3312389650396939	-497.976757839914
1.331934483689069	-498.767633105297
1.3326300046454427	-499.55934262153806
1.3333255279051843	-500.3518868270263
1.334021053464671	-501.14526616015223
1.334716581320287	-501.93948105930514
1.3354121114684248	-502.7345319628756
1.336107643905483	-503.5304193092531
1.3368031786278693	-504.32714353682724
1.337498715631999	-505.12470508398843
1.3381942549142933	-505.92310438912597
1.3388897964711826	-506.7223418906303
1.3395853402991031	-507.52241802689065
1.3402808863945002	-508.3233332362976
1.3409764347538256	-509.1250879572405
1.3416719853735382	-509.927682628109
1.3423675382501055	-510.7311176872936
1.3430630933800007	-511.5353935731833
1.3437586507597057	-512.3405107241688
1.3444542103857093	-513.1464695786391
1.3451497722545074	-513.9532705749848
1.3458453363626035	-514.7609141515951
1.3465409027065078	-515.5694007468602
1.347236471282739	-516.3787307991697
1.347932042087821	-517.1889047469133
1.3486276151182865	-517.9999230284814
1.3493231903706755	-518.8117860822629
1.350018767841534	-519.6244943466485
1.350714347527416	-520.4380482600269
1.3514099294248825	-521.2524482607892
1.3521055135305011	-522.067694787324
1.3528010998408477	-522.8837882780222
1.353496688352504	-523.7007291712727
1.3541922790620589	-524.5185179054653
1.3548878719661095	-525.3371549189902
1.3555834670612585	-526.1566406502368
1.356279064344117	-526.9769755375954
1.3569746638113012	-527.798160019455
1.3576702654594364	-528.6201945342061
1.3583658692851535	-529.4430795202381
1.35906147528509	-530.2668154159405
1.359757083455892	-531.0914026597035
1.3604526937942112	-531.9168416899164
1.361148306296706	-532.7431329449696
1.3618439209600428	-533.5702768632518
1.3625395377808938	-534.3982738831538
1.3632351567559384	-535.2271244430646
1.363930777881863	-536.0568289813743
1.3646264011553602	-536.8873879364725
1.3653220265731303	-537.7188017467487
1.3660176541318796	-538.551070850593
1.3667132838283214	-539.3841956863947
1.3674089156591756	-540.2181766925441
1.3681045496211686	-541.0530143074302
1.368800185711035	-541.8887089694433
1.3694958239255135	-542.7252611169723
1.3701914642613515	-543.562671188408
1.3708871067153026	-544.4009396221393
1.3715827512841257	-545.2400668565559
1.3722783979645885	-546.0800533300478
1.3729740467534637	-546.9208994810044
1.3736696976475313	-547.7626057478157
1.3743653506435771	-548.6051725688709
1.3750610057383943	-549.4486003825601
1.3757566629287827	-550.292889627273
1.376452322211547	-551.1380407413985
1.377147983583501	-551.9840541633274
1.377843647041462	-552.8309303314483
1.3785393125822563	-553.6786696841516
1.3792349802027153	-554.5272726598263
1.3799306498996768	-555.3767396968631
1.3806263216699861	-556.22707123365
1.3813219955104936	-557.0782677085783
1.3820176714180568	-557.9303295600366
1.382713349389539	-558.7832572264148
1.3834090294218107	-559.6370511461027
1.384104711511748	-560.4917117574895
1.3848003956562334	-561.3472394989655
1.3854960818521558	-562.2036348089193
1.3861917700964106	-563.0608981257417
1.3868874603858992	-563.9190298878212
1.3875831527175295	-564.7780305335485
1.3882788470882153	-565.6379005013125
1.3889745434948761	-566.4986402295026
1.3896702419344396	-567.3602501565091
1.390365942403837	-568.2227307207208
1.3910616449000082	-569.0860823605282
1.3917573494198967	-569.9503055143198
1.3924530559604549	-570.8154006204862
1.3931487645186391	-571.6813681174167
1.3938444750914125	-572.5482084435002
1.3945401876757446	-573.4159220371273
1.3952359022686107	-574.2845093366865
1.3959316188669924	-575.1539707805687
1.396627337467877	-576.0243068071619
1.3973230580682583	-576.895517854857
1.3980187806651352	-577.7676043620427
1.3987145052555143	-578.640566767109
1.3994102318364063	-579.5144055084455
[truncated: 8,000 more rows]
