# Supplementary material for: Critical Phenomena of Charged AdS Black Holes in Rastall Gravity
Source: Hindawi journal article supplement (doi:10.1155/2020/4065254), 2020-01-24
Supplement: f1 [file 4065254.f1.zip › Fig3(b)-GT2.dat]

2716.6551878671416	-1.6683926412810015
1932.2741831467974	-1.3983537927179248
1412.7228025148888	-1.183584530524368
1057.0316569687602	-1.009736094065374
806.6302215330752	-0.8668986984366772
626.0889303398703	-0.7480324415063834
493.19656636005766	-0.6480141830958182
393.5924086531063	-0.5630371760898643
317.7382769230703	-0.49022088744559517
259.147250175512	-0.4273504286212486
213.313931452828	-0.3726983333497277
177.04991305816543	-0.32490005117359577
148.06044755744597	-0.28286530911012076
124.66862378262226	-0.24571392977232248
105.63195748137673	-0.21272864145057463
90.01816227754205	-0.18331989640621596
77.11957907745932	-0.15699930754238178
66.39332046538641	-0.13335935844589936
57.41880684286252	-0.11205773930938909
49.86724616225683	-0.09280513474363085
43.47943225538671	-0.07535561589625399
38.049413097756656	-0.0594990175094621
33.412351635538016	-0.0450548422192995
29.435415097277314	-0.031867350328082245
26.01087507799207	-0.01980157735769198
23.050837446490164	-0.008740083313905458
20.48318493644888	0.00141971679449065
18.248429907105816	0.010767757560280432
16.297255825072654	0.019383153602917796
14.588583926389646	0.027335726997727794
13.088043274706962	0.0346872879516179
11.766752811113236	0.04149271344359044
10.600346280228791	0.0478008595984721
9.568187401227135	0.053655336565949466
8.652734935843341	0.059095169173890474
7.839026524593095	0.06415536227083095
7.114257129185887	0.06886738620805585
6.467433218121968	0.07325959514051494
5.88908788802641	0.07735758859777155
5.371045235595787	0.08118452497617025
4.906224712498911	0.08476139414237056
4.4884780774537205	0.08810725514733261
4.112453032257534	0.09123944407458827
3.7734787865449135	0.0941737562449551
3.4674697110218204	0.09692460633821669
3.1908439651903393	0.09950516944416203
2.9404545645892313	0.10192750559972337
2.7135308161445124	0.10420266998876242
2.5076284228727346	0.10634081066282874
2.3205868599190893	0.10835125537398892
2.1504928675307156	0.11024258888571639
1.9956491046337632	0.1120227219376339
1.8545471682802415	0.11369895287876394
1.725844316521389	0.11527802284700467
1.608343340918296	0.11676616525589478
1.5009751244212381	0.11816915025008619
1.4027834943346988	0.1194923247056155
1.3129120414096676	0.12074064827780076
1.2305926270829843	0.12191872593658203
1.1551353433770473	0.12303083737475838
1.0859197254906192	0.1240809636275853
1.0223870468751386	0.12507281120152147
0.9640335515959677	0.12600983397457033
0.9104044998369645	0.12689525309996177
0.8610889201847911	0.12773207511812898
0.8157149773724548	0.12852310845857554
0.7739458769183756	0.12927097849276883
0.7354762389402154	0.1299781412812856
0.7000288826574739	0.1306468961427101
0.6673519709785047	0.1312793971579373
0.6372164713082675	0.13187766371137388
0.6094138944892222	0.1324435901597604
0.5837542787459746	0.132978954709857
0.5600643897698596	0.13348542757781995
0.5381861117543991	0.1339645784956519
0.5179750073650311	0.13441788362349524
0.4992990273695632	0.13484673192066246
0.4820373530317248	0.13525243102306092
0.46607935643132237	0.13563621267001985
0.45132366566565807	0.1359992377193456
0.4376773234457758	0.1363426007857338
0.42505502895949476	0.1366673345343276
0.4133784540596501	0.136974413658228
0.4025756258724851	0.13726475856610404
0.3925803688290159	0.13753923880362856
0.38333179991793287	0.1377986762303267
0.3747738716571387	0.13804384797146466
0.36685495789504685	0.13827548916287152
0.3595274780933444	0.13849429550499465
0.35274755621912846	0.13870092564106729
0.3464747107945776	0.13889600337298985
0.3406715730238883	0.1390801197273392
0.33530363024522636	0.13925383488287912
0.33033899224666463	0.13941767996998852
0.3257481782426659	0.13957215875154366
0.3215039225367189	0.13971774919401528
0.3175809970988688	0.13985490493680913
0.3139560494679561	0.13998405666724292
0.3106074545493023	0.1401056134079422
0.30751517902219483	0.1402199637229061
0.3046606571995678	0.14032747684799418
0.3020266772967197	0.14042850375113788
0.2995972771681412	0.14052337812716414
0.29735764866305736	0.140612417331744
0.2952940498323242	0.14069592325863292
0.29339372429265165	0.14077418316405324
0.2916448271203125	0.14084747044177826
0.29003635670548356	0.14091604535221774
0.28855809205178407	0.14098015570854722
0.28720053505340104	0.1410400375227147
0.28595485732533543	0.14109591561394375
0.28481285120116695	0.14114800418216056
0.2837668845478447	0.14119650734860523
0.2828098590785446	0.14124161966572224
0.28193517187338557	0.14128352659827256
0.281136679843466	0.14132240497748777
0.2804086668971735	0.14135842342993926
0.2797458135888702	0.1413917427827008
0.27914316904920167	0.14142251644625703
0.27859612501368325	0.14145089077652498
0.27810039178205415	0.14147700541725194
0.2776519759550764	0.14150099362397678
0.2772471598086428	0.14152298257065868
0.27688248217675326	0.14154309364000286
0.27655472072578835	0.14156144269844917
0.27626087551221	0.14157814035672342
0.2759981537248599	0.14159329221679118
0.2757639555210627	0.141606999106006
0.275555860873264	0.14161935729918623
0.2753716173495908	0.14163045872931196
0.2752091287580365	0.14164039118748872
0.2750664445895379	0.1416492385127865
0.27494175020040057	0.1416570807725167
0.2748333576792814	0.14166399443348723
0.2747396973482572	0.14167005252473103
0.2746593098514225	0.14167532479218042
0.274590838788185	0.14167987784572714
0.27453302385167166	0.14168377529908324
0.2744846944357504	0.14168707790283336
0.27444476367699044	0.14168984367104137
0.27441222290040557	0.14169212800176123
0.2743861364402531	0.14169398379177234
0.2743656368092964	0.14169546154584478
0.2743499201919284	0.14169660948082627
0.27433824223843617	0.14169747362481583
0.27432991413933117	0.14169809791168358
0.274324298960261	0.14169852427117616
0.27432080821944815	0.1416987927148343
0.27431889869090265	0.14169894141793732
0.2743180694179084	0.14169900679767578
0.2743178589224047	0.14169902358774544
0.27431784259688197	0.14169902490953817
0.2743176302664381	0.14169904234010527
0.27431686390947707	0.1416991059770505
0.27431521552635596	0.14169924450050642
0.2743123851460805	0.141699485232336
0.2743080989618085	0.14169985419269937
0.27430210758658324	0.1417003761541086
0.2742941844213287	0.14170107469309862
0.27428412412768033	0.14170197223962394
0.2742717411987532	0.14170309012429402
0.27425686862140086	0.1417044486235508
0.2742393566240038	0.1417060670028818
0.2742190715041892	0.14170796355816828
0.2741958945312919	0.14171015565525194
0.27416972091871816	0.14171265976780467
0.27414045886169314	0.14171549151358195
0.2741080286361781	0.14171866568913244
0.2740723617550309	0.14172219630303884
0.2740334001777478	0.1417260966077537
0.27399109557035395	0.14173037913009795
0.27394540861226324	0.1417350557004803
0.2738963083471089	0.14174013748089795
0.27384377157476814	0.1417456349917733
0.273787782281977	0.1417515581376774
0.2737283311090919	0.14175791623199174
0.27366541485073537	0.14176471802055562
0.27359903598819146	0.14177197170434402
0.2735292022515661	0.1417796849612182
0.27345592620984527	0.1417878649667904
0.2733792248871163	0.14179651841444238
0.2732991194033201	0.14180565153453387
0.2732156346380086	0.14181527011283518
0.27312879891567743	0.14182537950822052
0.2730386437113428	0.1418359846696511
0.27294520337510364	0.14184709015248
0.27284851487451656	0.14185870013410745
0.2727486175536853	0.1418708184290144
0.2726455529080367	0.14188344850320114
0.27253936437381054	0.1418965934880557
0.272430097131362	0.1419102561936752
0.27231779792142863	0.1419244391216654
0.27220251487356206	0.14193914447743888
0.2720842973459794	0.14195437418203166
0.27196319577613104	0.14197012988346147
0.2718392615413314	0.14198641296764306
0.27171254682883395	0.14200322456888115
0.2715831045147654	0.14202056557995812
0.27145098805138534	0.14203843666183197
0.2713162513621521	0.14205683825296095
0.27117894874412574	0.14207577057827203
0.2710391347772402	0.14209523365778254
0.27089686424004344	0.14211522731489637
0.2707521920314937	0.14213575118438015
0.27060517309844434	0.14215680472003836
0.27045586236846264	0.1421783872020955
0.2703043146876619	0.14220049774429952
0.27015058476322606	0.14222313530075537
0.2699947271103459	0.14224629867250174
0.26983679600328614	0.14226998651383901
0.26967684543033243	0.14229419733841925
0.26951492905237084	0.14231892952510777
0.2693511001648796	0.14234418132362475
0.2691854116631116	0.14236995085997542
0.2690179160102747	0.14239623614167732
0.2688486652085169	0.1424230350627926
0.268677710772537	0.14245034540877222
0.26850510370566216	0.14247816486112086
0.2683308944782242	0.14250649100188684
0.268155133008096	0.14253532131798602
0.2679778686432457	0.14256465320536663
0.2677991501461776	0.14259448397301658
0.26761902568013873	0.14262481084682582
0.26743754279697574	0.1426556309733039
0.26725474842653074	0.14268694142315985
0.2670706888674782	0.14271873919475164
0.26688540977950326	0.1427510212174066
0.26669895617673367	0.1427837843546207
0.26651137242233935	0.1428170254071381
0.2663227022242207	0.1428507411159204
0.26613298863170765	0.14288492816500237
0.2659422740332037	0.14291958318424686
0.265750600154705	0.14295470275199507
0.2655580080591332	0.1429902833976206
0.26536453814642347	0.14302632160398993
0.26517023015431385	0.1430628138098319
0.26497512315978	0.1430997564120197
0.2647792555810733	0.1431371457677694
0.26458266518031137	0.14317497819675734
0.2643853890665787	0.1432132499831598
0.26418746369950014	0.1432519573776173
0.2639889248932461	0.14329109659912648
0.2637898078209361	0.14333066383686238
0.2635901470194043	0.1433706552519335
0.2633899763943027	0.14341106697907186
0.26318932922550226	0.14345189512826073
0.26298823817277356	0.14349313578630246
0.2627867352817153	0.14353478501832714
0.2625848519899121	0.14357683886924658
0.262382619133292	0.1436192933651539
0.26218006695266755	0.1436621445146704
0.2619772251004396	0.14370538831024338
0.2617741226474435	0.14374902072939416
0.26157078808992223	0.14379303773592117
0.26136724935660904	0.1438374352810564
0.2611635338159046	0.1438822093045794
0.2609596682831344	0.14392735573588855
0.2607556790278739	0.14397287049503302
0.26055159178132803	0.1440187494937053
0.2603474317437531	0.14406498863619494
0.26014322359191244	0.14411158382030814
0.2599389914865536	0.14415853093825082
0.2597347590798982	0.14420582587747807
0.25953054952313703	0.14425346452151167
0.25932638547392095	0.14430144275072546
0.25912228910384055	0.14434975644310072
0.25891828210588813	0.14439840147495214
0.258714385701895	0.14444737372162558
0.25851062064993696	0.14449666905816852
0.2583070072517066	0.14454628335997405
0.25810356535984263	0.14459621250339988
0.2579003143852142	0.14464645236636203
0.25769727330415476	0.144696998828906
0.25749446066564347	0.14474784777375355
0.2572918945984281	0.1447989950868289
0.2570895928180874	0.144850436657763
0.25688757263403134	0.14490216838037712
0.2566858509564323	0.14495418615314642
0.2564844443030908	0.14500648587964537
0.2562833688062283	0.14505906346897346
0.25608264021920707	0.14511191483616376
0.2558822739231771	0.14516503590257412
0.2556822849336454	0.14521842259626172
0.25548268790696854	0.14527207085234153
0.2552834971467659	0.14532597661332908
0.25508472661025416	0.14538013582946888
0.254886389914501	0.14543454445904763
0.25468850034259655	0.14548919846869393
0.25449107084974476	0.1455440938336645
0.2542941140692705	0.14559922653811722
0.2540976423185459	0.14565459257537186
0.2539016676048327	0.14571018794815851
0.25370620163104163	0.14576600866885445
0.25351125580140915	0.14582205075970944
0.25331684122709097	0.14587831025306064
0.2531229687316725	0.1459347831915366
0.2529296488565974	0.14599146562825105
0.2527368918665128	0.1460483536269876
0.25254470775453275	0.14610544326237362
0.25235310624742024	0.14616273062004664
0.2521620968106883	0.14622021179681066
0.2519716886536194	0.14627788290078442
0.25178189073420554	0.14633574005154193
0.251592711764009	0.14639377938024412
0.25140416021294276	0.1464519970297635
0.2512162443139746	0.14651038915480152
0.25102897206775215	0.14656895192199856
0.2508423512471517	0.14662768151003705
0.25065638940175106	0.14668657410973795
0.2504710938622269	0.1467456259241515
0.25028647174467755	0.14680483316864035
0.2501025299548725	0.14686419207095858
0.24991927519242882	0.14692369887132356
0.24973671395491526	0.14698334982248315
0.24955485254188642	0.147043141189777
0.24937369705884513	0.14710306925119285
0.24919325342113655	0.14716313029741881
0.24901352735777393	0.14722332063188887
0.24883452441519593	0.1472836365708261
0.24865624996095836	0.1473440744432796
0.24847870918735915	0.14740463059115844
0.24830190711499944	0.14746530136926067
0.24812584859628053	0.1475260831452988
0.24795053831883723	0.14758697229992118
0.24777598080891017	0.14764796522673018
0.24760218043465634	0.14770905833229647
0.24742914140939898	0.14777024803616945
0.2472568677948197	0.14783153077088562
0.24708536350409022	0.14789290298197283
0.24691463230494817	0.1479543611279514
0.2467446778227152	0.14801590168033327
0.24657550354326013	0.14807752112361744
0.2464071128159068	0.14813921595528295
0.24623950885628823	0.14820098268577941
0.24607269474914728	0.14826281783851508
0.24590667345108552	0.1483247179498423
0.24574144779326046	0.14838667956904109
0.24557702048403246	0.14844869925829957
0.24541339411156188	0.14851077359269327
0.245250571146357	0.1485728991601623
0.2450885539437746	0.14863507256148598
0.2449273447464726	0.14869729041025587
0.24476694568681703	0.1487595493328469
0.2446073587892427	0.14882184596838774
0.24444858597256944	0.1488841769687275
0.2442906290522739	0.14894653899840307
0.24413348974271898	0.14900892873460342
0.2439771696593391	0.14907134286713297
0.2438216703207854	0.14913377809837386
0.24366699315102858	0.14919623114324626
0.2435131394814225	0.14925869872916797
0.24336011055272697	0.14932117759601243
0.24320790751709268	0.14938366449606594
0.24305653144000722	0.1494461561939834
0.24290598330220423	0.1495086494667433
0.24275626400153474	0.14957114110360165
0.2426073743548035	0.14963362790604465
0.24245931509956853	0.14969610668774103
0.2423120868959069	0.1497585742744928
0.24216569032814547	0.1498210275041862
0.2420201259065585	0.14988346322674068
0.2418753940690318	0.14994587830405803
0.24173149518269504	0.15000826960997043
0.24158842954552145	0.1500706340301881
0.24144619738789733	0.1501329684622459
0.2413047988741597	0.15019526981544978
0.24116423410410512	0.15025753501082245
0.24102450311446794	0.1503197609810487
0.2408856058803703	0.1503819446704201
0.24074754231674306	0.15044408303477885
0.24061031227971957	0.15050617304146252
0.2404739155680014	0.15056821166924653
0.2403383519241974	0.1506301959082879
0.2402036210361368	0.1506921227600678
0.24006972253815534	0.15075398923733369
0.2399366560123578	0.1508157923640419
0.23980442098985383	0.15087752917529923
0.2396730169519699	0.15093919671730463
0.2395424433314383	0.15100079204729044
0.23941269951356103	0.1510623122334641
0.23928378483735166	0.15112375435494835
0.23915569859665423	0.15118511550172298
0.23902844004123977	0.15124639277456473
0.23890200837788145	0.1513075832849885
0.23877640277140805	0.1513686841551875
0.23865162234573623	0.15142969251797378
0.23852766618488289	0.15149060551671878
0.23840453333395695	0.15155142030529295
0.23828222280013092	0.15161213404800686
0.23816073355359413	0.15167274391955077
0.2380400645284858	0.15173324710493516
0.2379202146238101	0.1517936407994308
0.23780118270433268	0.1518539222085093
0.2376829676014593	0.15191408854778282
0.23756556811409665	0.151974137042945
0.2374489830094961	0.15203406492971092
0.23733321102408028	0.15209386945375772
0.2372182508642535	0.15215354787066515
0.23710410120719497	0.15221309744585598
0.23699076070163694	0.15227251545453696
0.23687822796862673	0.15233179918163958
0.23676650160227306	0.15239094592176078
0.23665558017047825	0.15244995297910435
0.23654546221565428	0.15250881766742194
0.23643614625542575	0.1525675373099544
0.23632763078331737	0.15262610923937348
0.23621991426942823	0.1526845307977231
0.23611299516109213	0.15274279933636165
0.2360068718835246	0.15280091221590358
0.23590154284045659	0.15285886680616204
0.2357970064147553	0.15291666048609065
0.2356932609690324	0.15297429064372658
0.23559030484623994	0.15303175467613298
0.23548813637025354	0.15308904998934242
0.23538675384644453	0.1531461739982994
0.2352861555622394	0.15320312412680434
0.2351863397876687	0.15325989780745675
0.23508730477590387	0.1533164924815994
0.23498904876378346	0.15337290559926228
0.23489156997232846	0.1534291346191068
0.23479486660724702	0.1534851770083705
0.23469893685942855	0.15354103024281163
0.23460377890542794	0.15359669180665458
0.2345093909079395	0.15365215919253455
0.2344157710162611	0.15370742990144362
0.23432291736674876	0.1537625014426762
0.23423082808326204	0.1538173713337753
0.2341395012775994	0.15387203710047864
0.23404893504992536	0.15392649627666527
0.23395912748918837	0.1539807464043025
0.23387007667352974	0.1540347850333929
0.23378178067068436	0.15408860972192162
0.23369423753837282	0.15414221803580408
0.23360744532468547	0.15419560754883402
0.23352140206845812	0.1542487758426313
0.2334361057996402	0.15430172050659086
0.23335155453965467	0.154354439137831
0.23326774630175098	0.15440692934114278
0.23318467909134982	0.15445918872893893
0.23310235090638118	0.15451121492120376
0.2330207597376148	0.1545630055454429
0.2329399035689839	0.15461455823663328
0.23285978037790173	0.1546658706371739
0.23278038813557164	0.15471694039683626
0.23270172480729018	0.1547677651727154
0.23262378835274403	0.15481834262918134
0.23254657672630036	0.15486867043783048
0.23247008787729098	0.15491874627743749
0.23239431975029037	0.15496856783390744
0.23231927028538757	0.15501813280022847
0.23224493741845254	0.155067438876424
0.2321713190813962	0.1551164837695062
0.23209841320242527	0.1551652651934292
0.23202621770629137	0.15521378086904244
0.23195473051453455	0.15526202852404475
0.23188394954572178	0.1553100058929384
0.23181387271567985	0.15535771071698348
0.23174449793772345	0.15540514074415282
0.231675823122878	0.155452293729087
0.23160784618009755	0.15549916743304937
0.23154056501647813	0.15554575962388167
0.2314739775374658	0.15559206807596043
0.2314080816470606	0.15563809057015227
0.23134287524801578	0.15568382489377103
0.23127835624203222	0.15572926884053423
0.23121452252994892	0.15577442021051974
0.23115137201192898	0.1558192768101239
0.2310889025876413	0.15586383645201807
0.2310271121564384	0.1559080969551072
0.2309659986175297	0.15595205614448754
0.23090555987015154	0.15599571185140537
0.2308457938137327	0.1560390619132153
0.23078669834805624	0.15608210417333945
0.2307282713734178	0.1561248364812266
0.23067051079078002	0.15616725669231177
0.23061341450192346	0.1562093626679757
0.23055698040959405	0.15625115227550535
0.23050120641764688	0.15629262338805375
0.2304460904311866	0.1563337738846009
0.230391630356705	0.15637460164991435
0.23033782410221457	0.15641510457451063
0.23028466957737942	0.15645528055461638
0.23023216469364283	0.15649512749212996
0.23018030736435177	0.15653464329458353
0.2301290955048786	0.15657382587510513
0.2300785270327393	0.15661267315238125
0.23002859986770946	0.1566511830506192
0.22997931193193707	0.15668935349951035
0.22993066115005245	0.15672718243419326
0.22988264544927572	0.15676466779521697
0.22983526275952154	0.15680180752850514
0.22978851101350084	0.15683859958531943
0.2297423881468208	0.15687504192222423
0.22969689209808125	0.15691113250105088
0.22965202080896982	0.15694686928886237
0.2296077722243534	0.15698225025791854
0.22956414429236838	0.15701727338564103
0.2295211349645077	0.15705193665457884
0.22947874219570616	0.15708623805237412
0.2294369639444232	0.15712017557172792
0.2293957981727238	0.15715374721036665
0.22935524284635664	0.1571869509710082
0.2293152959348312	0.15721978486132893
0.22927595541149154	0.1572522468939302
0.22923721925358903	0.15728433508630588
0.22919908544235276	0.15731604746080946
0.22916155196305785	0.1573473820446218
0.22912461680509214	0.1573783368697188
0.22908827796202097	0.15740890997283985
0.22905253343164989	0.15743909939545553
0.22901738121608595	0.15746890318373652
0.22898281932179698	0.15749831938852255
0.22894884575966917	0.15752734606529073
0.22891545854506318	0.15755598127412532
0.22888265569786836	0.1575842230796869
0.2288504352425553	0.157612069551182
0.22881879520822732	0.15763951876233306
0.22878773362866967	0.1576665687913484
0.22875724854239782	0.15769321772089245
0.22872733799270384	0.15771946363805642
0.2286980000277017	0.1577453046343289
0.2286692327003707	0.1577707388055669
0.22864103406859798	0.15779576425196667
0.2286134021952194	0.15782037907803545
0.22858633514805887	0.15784458139256277
0.2285598309999669	0.15786836930859227
0.2285338878288574	0.15789174094339353
0.22850850371774334	0.15791469441843456
0.22848367675477133	0.15793722785935382
0.228459405033255	0.15795933939593293
0.22843568665170647	0.15798102716206938
0.2284125197138681	0.15800228929574966
0.22838990232874165	0.15802312393902215
0.2283678326106171	0.1580435292379706
0.22834630867910022	0.15806350334268765
0.22832532865913915	0.15808304440724874
0.22830489068104975	0.1581021505896857
0.2282849928805401	0.15812082005196118
0.2282656333987336	0.15813905095994263
0.22824681038219202	0.15815684148337722
0.22822852198293647	0.15817418979586603
0.22821076635846804	0.15819109407483922
0.22819354167178751	0.15820755250153107
0.2281768460914141	0.15822356326095505
0.22816067779140303	0.1582391245418793
0.2281450349513628	0.1582542345368022
0.22812991575647107	0.1582688914419282
0.22811531839749014	0.15828309345714353
0.22810124107078122	0.15829683878599263
0.2280876819783182	0.1583101256356541
0.22807463932770067	0.15832295221691745
0.22806211133216586	0.15833531674415954
0.22805009621060013	0.15834721743532146
0.22803859218754968	0.15835865251188533
0.22802759749323043	0.1583696201988517
0.22801711036353733	0.15838011872471666
0.2280071290400529	0.1583901463214493
0.22799765177005515	0.1583997012244694
0.22798867680652493	0.1584087816726252
0.22798020240815237	0.1584173859081714
0.22797222683934298	0.15842551217674708
0.22796474837022304	0.15843315872735425
0.2279577652766444	0.158440323812336
0.2279512758401886	0.1584470056873552
0.22794527834817044	0.15845320261137336
0.22793977109364139	0.15845891284662925
0.22793475237539165	0.15846413465861814
0.22793022049795247	0.15846886631607102
0.22792617377159752	0.15847310609093376
0.22792261051234375	0.1584768522583468
0.22791952904195203	0.15848010309662455
0.22791692768792696	0.15848285688723557
0.22791480478351642	0.15848511191478212
0.2279131586677106	0.15848686646698035
0.22791198768524065	0.15848811883464076
0.22791129018657663	0.15848886731164813
0.22791106452792528	0.15848911019494258
0.22791130907122742	0.15848884578449957
0.22791202218415452	0.15848807238331128
0.22791320224010553	0.15848678829736723
0.2279148476182025	0.15848499183563544
0.2279169567032866	0.1584826813100435
0.22791952788591316	0.15847985503546014
0.22792255956234686	0.15847651132967655
0.22792605013455594	0.15847264851338794
0.22792999801020675	0.15846826491017538
0.22793440160265732	0.1584633588464877
0.22793925933095122	0.15845792865162342
0.22794456961981047	0.15845197265771277
0.22795033089962857	0.15844548919970022
0.22795654160646298	0.15843847661532662
0.2279632001820276	0.1584309332451118
0.22797030507368454	0.15842285743233725
0.227977854734436	0.15841424752302885
0.22798584762291535	0.1584051018659397
0.22799428220337872	0.15839541881253316
0.22800315694569562	0.1583851967169661
0.22801247032533947	0.15837443393607192
0.2280222208233781	0.15836312882934406
0.22803240692646393	0.15835127975891952
0.22804302712682373	0.1583388850895624
0.22805407992224813	0.15832594318864757
0.22806556381608137	0.15831245242614467
0.22807747731721012	0.15829841117460192
0.22808981894005284	0.15828381780913023
0.22810258720454818	0.15826867070738743
0.22811578063614368	0.15825296824956253
0.22812939776578428	0.15823670881836
0.22814343712990026	0.15821989079898466
0.22815789727039534	0.15820251257912574
0.22817277673463443	0.15818457254894214
0.22818807407543135	0.15816606910104708
0.22820378785103618	0.15814700063049292
0.22821991662512248	0.1581273655347564
0.22823645896677452	0.15810716221372378
0.22825341345047434	0.15808638906967604
0.22827077865608827	0.1580650445072742
0.22828855316885385	0.158043126933545
0.22830673557936626	0.15802063475786637
0.22832532448356457	0.157997566391953
0.22834431848271816	0.15797392024984225
0.2283637161834128	0.15794969474788018
0.22838351619753655	0.1579248883047071
0.22840371714226565	0.1578994993412441
0.22842431764005025	0.1578735262806789
0.22844531631860018	0.1578469675484524
0.2284667118108702	0.15781982157224483
0.22848850275504562	0.15779208678196247
0.2285106877945276	0.15776376160972377
0.22853326557791806	0.15773484448984648
0.2285562347590053	0.1577053338588342
0.22857959399674854	0.1576752281553632
0.2286033419552631	0.15764452582026933
0.22862747730380517	0.15761322529653526
0.22865199871675645	0.15758132502927724
0.22867690487360912	0.15754882346573265
0.22870219445895013	0.1575157190552472
0.2287278661624458	0.15748201024926206
0.2287539186788265	0.15744769550130178
0.22878035070787062	0.15741277326696146
0.2288071609543893	0.15737724200389464
0.22883434812821046	0.15734110017180092
0.22886191094416297	0.15730434623241374
0.2288898481220609	0.15726697864948835
0.2289181583866876	0.15722899588879
0.2289468404677797	0.1571903964180815
0.22897589310001104	0.1571511787071119
0.2290053150229767	0.15711134122760428
0.22903510498117688	0.15707088245324458
0.22906526172400068	0.15702980085966944
0.22909578400571	0.15698809492445512
0.22912667058542333	0.15694576312710565
0.22915792022709935	0.15690280394904194
0.22918953169952067	0.15685921587359003
0.22922150377627779	0.15681499738597024
0.22925383523575232	0.1567701469732858
0.22928652486110082	0.156724663124512
0.22931957144023854	0.15667854433048486
0.22935297376582267	0.15663178908389075
0.22938673063523612	0.15658439587925507
0.22942084085057105	0.15653636321293177
0.22945530321861218	0.15648768958309256
0.22949011655082063	0.15643837348971634
0.2295252796633171	0.15638841343457865
0.22956079137686553	0.15633780792124136
0.22959665051685652	0.1562865554550419
0.22963285591329072	0.15623465454308327
0.22966940640076236	0.15618210369422364
0.2297063008184428	0.15612890141906638
0.22974353801006367	0.15607504622994958
0.22978111682390057	0.15602053664093637
0.22981903611275656	0.15596537116780465
0.22985729473394534	0.15590954832803738
0.22989589154927478	0.15585306664081264
0.22993482542503058	0.15579592462699401
0.2299740952319595	0.15573812080912053
0.23001369984525283	0.15567965371139741
0.23005363814452995	0.15562052185968633
0.23009390901382182	0.1555607237814958
0.23013451134155427	0.15550025800597192
0.2301754440205318	0.1554391230638888
0.2302167059479207	0.15537731748763947
0.23025829602523307	0.1553148398112264
0.23030021315830979	0.1552516885702523
0.2303424562573046	0.15518786230191123
0.23038502423666724	0.1551233595449793
0.23042791601512735	0.15505817883980566
0.23047113051567794	0.15499231872830374
0.23051466666555898	0.15492577775394215
0.23055852339624106	0.154858554461736
0.23060269964340907	0.1547906473982379
0.23064719434694608	0.15472205511152953
0.23069200645091664	0.15465277615121292
0.23073713490355094	0.15458280906840152
0.23078257865722832	0.1545121524157122
0.23082833666846106	0.1544408047472563
0.23087440789787841	0.15436876461863153
0.23092079131021004	0.1542960305869132
0.23096748587427046	0.15422260121064646
0.23101449056294243	0.15414847504983759
0.23106180435316104	0.15407365066594594
0.2311094262258978	0.15399812662187568
0.23115735516614458	0.153921901481968
0.23120559016289746	0.15384497381199264
0.23125413020914098	0.15376734217914023
0.23130297430183222	0.15368900515201428
0.23135212144188477	0.15360996130062302
0.23140157063415306	0.1535302091963721
0.23145132088741655	0.15344974741205628
0.2315013712143637	0.15336857452185199
0.23155172063157656	0.1532866891013095
0.2316023681595149	0.15320408972734548
0.2316533128225007	0.1531207749782352
0.23170455364870224	0.15303674343360507
0.2317560896701188	0.15295199367442536
0.23180791992256494	0.15286652428300232
0.23186004344565514	0.1527803338429713
0.23191245928278814	0.15269342093928903
0.2319651664811317	0.1526057841582265
0.23201816409160714	0.15251742208736185
0.2320714511688739	0.15242833331557273
0.23212502677131447	0.15233851643302976
0.23217888996101887	0.15224797003118878
0.23223303980376953	0.15215669270278448
0.23228747536902616	0.15206468304182275
0.23234219572991066	0.15197193964357408
0.23239719996319175	0.15187846110456668
0.23245248714927033	0.1517842460225794
0.23250805637216404	0.15168929299663492
0.23256390671949273	0.15159360062699317
0.23262003728246322	0.15149716751514442
0.23267644715585456	0.15139999226380246
0.23273313543800317	0.1513020734768983
0.2327901012307881	0.1512034097595733
0.23284734363961623	0.15110399971817262
0.2329048617734077	0.1510038419602388
0.232962654744581	0.15090293509450503
0.2330207216690388	0.15080127773088914
0.233079061666153	0.15069886848048664
0.23313767385875034	0.15059570595556496
0.23319655737309808	0.1504917887695566
0.2332557113388895	0.1503871155370532
0.2333151348892294	0.150281684873799
0.23337482716061997	0.15017549539668507
0.23343478729294648	0.15006854572374273
0.23349501442946302	0.14996083447413758
0.23355550771677838	0.14985236026816348
0.23361626630484172	0.14974312172723636
0.23367728934692894	0.1496331174738885
0.2337385759996281	0.14952234613176216
0.23380012542282583	0.14941080632560397
0.2338619367796933	0.14929849668125883
0.23392400923667223	0.14918541582566425
0.2339863419634612	0.14907156238684444
0.23404893413300182	0.14895693499390442
0.23411178492146484	0.1488415322770244
0.23417489350823678	0.14872535286745409
0.23423825907590595	0.14860839539750698
0.2343018808102491	0.14849065850055465
0.23436575790021782	0.14837214081102124
0.23442988953792487	0.14825284096437796
0.23449427491863106	0.14813275759713737
0.23455891324073164	0.14801188934684795
0.2346238037057429	0.14789023485208874
0.23468894551828917	0.1477677927524638
0.23475433788608918	0.14764456168859685
0.2348199800199432	0.14752054030212594
0.23488587113371973	0.1473957272356981
0.23495201044434244	0.14727012113296406
0.23501839717177708	0.14714372063857278
0.23508503053901852	0.1470165243981667
0.23515190977207798	0.14688853105837607
0.23521903409996966	0.14675973926681402
0.23528640275469842	0.14663014767207141
0.23535401497124664	0.14649975492371162
0.23542186998756168	0.14636855967226567
0.2354899670445429	0.14623656056922701
0.2355583053860294	0.14610375626704658
0.235626884258787	0.1459701454191279
0.23569570291249609	0.14583572667982195
0.23576476059973883	0.14570049870442248
0.23583405657598677	0.14556446014916102
0.23590359009958856	0.14542760967120189
0.23597336043175748	0.14528994592863767
0.23604336683655913	0.14515146758048414
0.23611360858089933	0.14501217328667573
0.2361840849345116	0.14487206170806055
0.23625479516994535	0.14473113150639594
0.23632573856255362	0.14458938134434357
0.23639691439048094	0.14444680988546488
0.2364683219346514	0.14430341579421654
0.23653996047875675	0.14415919773594588
0.2366118293092444	0.14401415437688592
0.23668392771530555	0.14386828438415147
0.23675625498886338	0.14372158642573418
0.23682881042456144	0.14357405917049806
0.23690159331975166	0.1434257012881754
0.23697460297448278	0.14327651144936188
0.2370478386914889	0.14312648832551245
0.23712129977617769	0.14297563058893686
0.23719498553661889	0.14282393691279538
0.237268895283533	0.14267140597109448
0.23734302833027965	0.14251803643868238
0.2374173839928463	0.142363826991245
0.23749196158983693	0.14220877630530154
0.23756676044246072	0.1420528830582004
0.23764177987452084	0.14189614592811484
0.23771701921240312	0.14173856359403908
0.23779247778506515	0.1415801347357838
0.23786815492402502	0.1414208580339723
0.23794404996335022	0.1412607321700363
0.23802016223964678	0.14109975582621181
0.23809649109204828	0.1409379276855353
0.23817303586220484	0.14077524643183947
0.2382497958942723	0.14061171074974932
0.23832677053490153	0.14044731932467822
0.23840395913322743	0.14028207084282396
0.23848136104085849	0.14011596399116474
0.23855897561186568	0.13994899745745537
0.23863680220277234	0.13978116993022338
0.23871484017254327	0.1396124800987651
0.23879308888257422	0.1394429266531418
0.2388715476966814	0.1392725082841762
0.23895021598109112	0.13910122368344818
0.23902909310442932	0.13892907154329145
0.2391081784377112	0.1387560505567895
0.23918747135433094	0.13858215941777208
0.23926697123005136	0.13840739682081155
0.23934667744299382	0.1382317614612189
0.23942658937362787	0.13805525203504043
0.23950670640476135	0.1378778672390539
0.23958702792153	0.1376996057707651
0.2396675533113877	0.13752046632840415
0.23974828196409625	0.13734044761092185
0.23982921327171552	0.13715954831798627
0.23991034662859362	0.13697776714997928
0.2399916814313567	0.13679510280799284
0.24007321707889961	0.13661155399382574
0.2401549529723756	0.13642711940997987
0.24023688851518696	0.136241797759657
0.24031902311297526	0.13605558774675536
0.2404013561736115	0.13586848807586607
0.2404838871071866	0.13568049745226984
0.24056661532600201	0.13549161458193368
0.2406495402445599	0.13530183817150748
0.24073266127955384	0.1351111669283206
0.24081597784985925	0.13491959956037877
0.24089948937652428	0.1347271347763606
0.24098319528275997	0.13453377128561456
0.24106709499393142	0.1343395077981554
0.24115118793754817	0.13414434302466108
0.24123547354325514	0.13394827567646977
0.24131995124282338	0.13375130446557632
0.241404620470141	0.13355342810462922
0.2414894806612039	0.13335464530692753
0.24157453125410686	0.1331549547864176
0.2416597716890344	0.13295435525769003
0.2417452014082519	0.1327528454359766
0.24183081985609656	0.13255042403714706
0.2419166264789685	0.1323470897777062
0.24200262072532194	0.1321428413747907
0.2420888020456564	0.13193767754616625
0.24217516989250776	0.13173159701022435
0.2422617237204397	0.1315245984859793
0.24234846298603502	0.1313166806930655
0.24243538714788657	0.13110784235173423
0.24252249566658918	0.13089808218285076
0.24260978800473065	0.13068739890789147
0.24269726362688354	0.13047579124894082
0.24278492199959625	0.13026325792868865
0.2428727625913849	0.1300497976704272
0.24296078487272477	0.12983540919804815
0.2430489883160418	0.12962009123603996
0.24313737239570443	0.12940384250948486
0.2432259365880152	0.12918666174405619
0.24331468037120232	0.1289685476660155
0.24340360322541169	0.1287494990022099
0.2434927046326985	0.128529514480069
0.24358198407701903	0.12830859282760254
0.2436714410442228	0.12808673277339733
0.24376107502204408	0.1278639330466148
0.24385088550009418	0.12764019237698815
0.2439408719698532	0.12741550949481953
0.2440310339246621	0.1271898831309777
0.24412137085971486	0.12696331201689504
0.24421188227205043	0.1267357948845652
0.24430256766054492	0.1265073304665401
0.2443934265259038	0.12627791749592787
0.24448445837065386	0.12604755470638948
0.24457566269913583	0.12581624083213702
0.24466703901749648	0.12558397460793042
0.24475858683368057	0.1253507547690753
0.24485030565742388	0.12511658005142023
0.24494219500024497	0.12488144919135434
0.2450342543754379	0.12464536092580468
0.24512648329806466	0.12440831399223382
0.24521888128494745	0.12417030712863726
0.2453114478546614	0.12393133907354113
0.24540418252752721	0.12369140856599953
0.24549708482560317	0.12345051434559227
0.24559015427267863	0.12320865515242217
0.2456833903942659	0.12296582972711304
0.24577679271759326	0.12272203681080686
0.2458703607715978	0.12247727514516171
0.24596409408691777	0.12223154347234923
0.24605799219588587	0.12198484053505222
0.24615205463252163	0.12173716507646246
0.24624628093252443	0.12148851584027823
0.24634067063326653	0.12123889157070201
0.2464352232737857	0.1209882910124381
0.24652993839477833	0.12073671291069062
0.24662481553859247	0.12048415601116072
0.24671985424922072	0.12023061906004477
0.24681505407229326	0.11997610080403187
0.24691041455507118	0.11972059999030166
0.2470059352464391	0.11946411536652199
0.24710161569689887	0.11920664568084682
0.2471974554585623	0.11894818968191397
0.24729345408514475	0.11868874611884281
0.24738961113195795	0.11842831374123229
0.24748592615590362	0.11816689129915851
0.2475823987154666	0.11790447754317276
0.24767902837070807	0.1176410712242992
0.24777581468325927	0.11737667109403292
0.24787275721631452	0.11711127590433756
0.24796985553462483	0.11684488440764343
0.24806710920449127	0.11657749535684521
0.2481645177937586	0.11630910750529992
0.24826208087180845	0.11603971960682499
0.24835979800955338	0.11576933041569583
0.24845766877942993	0.11549793868664415
0.24855569275539252	0.11522554317485573
0.24865386951290708	0.11495214263596824
0.24875219862894443	0.11467773582606955
0.24885067968197444	0.11440232150169537
0.24894931225195932	0.11412589841982759
0.2490480959203475	0.1138484653378918
0.24914703027006765	0.11357002101375589
0.249246114885522	0.11329056420572751
0.2493453493525807	0.11301009367255258
0.2494447332585753	0.11272860817341297
0.24954426619229275	0.11244610646792483
0.24964394774396942	0.11216258731613644
0.24974377750528498	0.11187804947852649
0.24984375506935624	0.11159249171600197
0.24994388003073142	0.11130591278989638
0.250044151985384	0.11101831146196778
0.2501445705307067	0.11072968649439706
0.2502451352655059	0.1104400366497858
0.2503458457899954	0.11014936069115468
0.2504467017057907	0.1098576573819414
0.2505477026159031	0.10956492548599907
0.25064884812473415	0.10927116376759406
0.25075013783806954	0.10897637099140461
0.25085157136307357	0.10868054592251848
0.25095314830828314	0.10838368732643165
0.2510548682836026	0.10808579396904623
0.25115673090029733	0.1077868646166688
0.2512587357709888	0.10748689803600855
0.25136088250964855	0.10718589299417552
0.2514631707315927	0.10688384825867894
0.2515656000534762	0.10658076259742538
0.2516681700932878	0.106276634778717
0.2517708804703439	0.10597146357125002
0.2518737308052834	0.10566524774411265
0.25197672072006233	0.10535798606678375
0.25207984983794807	0.10504967730913078
0.25218311778351415	0.10474032024140846
0.25228652418263503	0.10442991363425676
0.25239006866248026	0.10411845625869948
0.2524937508515096	0.10380594688614232
0.2525975703794675	0.10349238428837151
0.2527015268773777	0.10317776723755197
0.25280561997753814	0.10286209450622573
0.2529098493135158	0.10254536486731024
0.2530142145201411	0.1022275770940968
0.2531187152335032	0.10190872996024904
0.2532233510909444	0.10158882223980102
0.2533281217310551	0.10126785270715599
0.2534330267936691	0.10094582013708457
0.2535380659198576	0.10062272330472316
0.2536432387519252	0.1002985609855725
0.2537485449334039	0.09997333195549601
0.2538539841090487	0.09964703499071824
0.2539595559248324	0.09931966886782338
0.2540652600279404	0.09899123236375361
0.254171096066766	0.09866172425580771
0.2542770636909056	0.09833114332163932
0.2543831625511531	0.09799948833925559
0.2544893922994961	0.09766675808701583
0.25459575258910977	0.09733295134362946
0.2547022430743531	0.0969980668881552
0.25480886341076336	0.09666210349999885
0.25491561325505174	0.09632505995891265
0.2550224922650982	0.09598693504499299
0.25512950009994695	0.09564772753867966
0.25523663641980165	0.09530743622075363
0.2553439008860207	0.09496605987233646
0.2554512931611126	0.09462359727488787
0.255558812908731	0.09428004721020561
0.2556664597936705	0.09393540846042243
0.2557742334818616	0.09358967980800605
0.25588213364036644	0.09324286003575716
0.2559901599373739	0.09289494792680772
0.25609831204219513	0.09254594226462029
0.2562065896252592	0.09219584183298592
0.25631499235810845	0.0918446454160233
0.2564235199133938	0.0914923517981769
0.2565321719648704	0.09113895976421622
0.2566409481873934	0.0907844680992337
0.2567498482569131	0.09042887558864414
0.2568588718504708	0.09007218101818242
0.2569680186461943	0.08971438317390318
0.2570772883232936	0.0893554808421786
0.2571866805620563	0.08899547280969775
0.2572961950438437	0.08863435786346459
0.257405831451086	0.08827213479079757
0.2575155894672782	0.08790880237932713
0.25762546877697595	0.08754435941699562
0.25773546906579103	0.08717880469205495
0.2578455900203873	0.08681213699306622
0.2579558313284765	0.08644435510889754
0.25806619267881376	0.08607545782872365
0.25817667376119363	0.08570544394202365
0.25828727426644604	0.08533431223858097
0.2583979938864318	0.08496206150848089
0.2585088323140389	0.08458869054210989
0.2586197892431779	0.08421419813015461
0.25873086436877835	0.08383858306360006
0.25884205738678423	0.08346184413372884
0.25895336799415036	0.0830839801321195
0.2590647958888379	0.0827049898506459
0.25917634076981083	0.08232487208147526
0.2592880023370315	0.0819436256170678
0.2593997802914568	0.08156124925017447
0.2595116743350344	0.08117774177383692
0.25962368417069864	0.08079310198138535
0.2597358095023663	0.08040732866643803
0.2598480500349334	0.08002042062289944
0.25996040547427046	0.0796323766449598
0.26007287552721947	0.07924319552709343
0.26018545990158937	0.07885287606405765
0.26029815830615244	0.07846141705089177
0.26041097045064066	0.07806881728291593
0.2605238960457416	0.07767507555572963
0.2606369348030948	0.07728019066521113
0.2607500864352881	0.07688416140751585
0.26086335065585353	0.07648698657907561
0.260976727179264	0.07608866497659703
0.2610902157209293	0.07568919539706093
0.26120381599719233	0.07528857663772086
0.2613175277253259	0.07488680749610233
0.26143135062352846	0.07448388677000112
0.2615452844109206	0.07407981325748296
0.26165932880754195	0.07367458575688163
0.2617734835343467	0.07326820306679882
0.2618877483132006	0.07286066398610194
0.2620021228668772	0.07245196731392406
0.2621166069190542	0.07204211184966201
0.26223120019431	0.07163109639297613
0.2623459024181202	0.07121891974378845
0.2624607133168539	0.07080558070228207
0.26257563261777034	0.07039107806890005
0.2626906600490153	0.06997541064434437
0.2628057953396178	0.06955857722957452
0.26292103821948637	0.06914057662580733
0.26303638841940596	0.06872140763451491
0.26315184567103406	0.06830106905742443
0.2632674097068977	0.06787955969651661
0.26338308026038987	0.067456878354025
0.26349885706576603	0.06703302383243472
0.26361473985814105	0.06660799493448177
0.26373072837348543	0.0661817904631516
0.26384682234862245	0.0657544092216787
0.2639630215212243	0.06532585001354484
0.2640793256298093	0.06489611164247898
0.2641957344137383	0.06446519291245548
0.26431224761321126	0.06403309262769362
0.26442886496926465	0.06359980959265638
0.2645455862237673	0.0631653426120498
0.2646624111194178	0.06272969049082147
0.264779339399741	0.06229285203416013
0.264896370809085	0.06185482604749429
0.2650135050926178	0.06141561133649176
0.26513074199632397	0.060975206707057986
0.26524808126700194	0.06053361096533601
0.26536552265226054	0.06009082291770461
0.2654830659005158	0.059646841370778275
0.26560071076098796	0.05920166513140536
0.2657184569836984	0.05875529300666808
0.2658363043194664	0.058307723803880634
0.2659542525199063	0.05785895633058945
0.2660723013374241	0.057408989394570925
0.2661904505252146	0.056957821803831785
0.26630869983725847	0.05650545236660737
0.266427049028319	0.056051879891360915
0.2665454978539391	0.05559710318678285
0.26666404607043864	0.05514112106178985
0.2667826934349108	0.05468393232552368
0.2669014397052199	0.05422553578735083
0.26702028463999783	0.053765930256861036
0.2671392279986412	0.053305114543866966
0.2672582695413089	0.052843087458402785
0.26737740902891827	0.052379847810724106
0.2674966462231433	0.05191539441130605
0.2676159808864106	0.05144972607084344
0.26773541278189744	0.05098284160024917
0.26785494167352836	0.050514739810653936
0.2679745673259724	0.05004541951340473
0.2680942895046404	0.049574879520064924
0.2682141079756823	0.04910311864241246
0.26833402250598354	0.04863013569243972
0.26845403286316327	0.0481559294823522
0.2685741388155711	0.04768049882456851
0.268694340132284	0.04720384253171801
0.26881463658310406	0.04672595941664197
0.2689350279385556	0.04624684829239094
0.26905551396988214	0.04576650797222534
0.26917609444904395	0.045284937269613704
0.26929676914871525	0.04480213499823245
0.26941753784228145	0.04431809997196452
0.2695384003038366	0.043832831004899625
0.26965935630818044	0.04334632691133189
0.269780405630816	0.04285858650576062
0.26990154804794675	0.042369608602888534
0.2700227833364741	0.04187939201762152
0.27014411127399457	0.04138793556506719
0.27026553163879724	0.04089523806053515
0.27038704420986137	0.04040129831953515
0.2705086487668534	0.0399061151577771
0.27063034509012457	0.039409687391169734
0.2707521329607084	0.03891201383582037
0.2708740121603178	0.03841309330803386
0.27099598247134293	0.03791292462431185
0.27111804367684855	0.03741150660135198
0.271240195560571	0.0369088380560475
0.27136243790691655	0.03640491780548598
0.271484770500958	0.035899744666949146
0.2716071931284328	0.03539331745791144
0.2717297055757401	0.034885634996040304
0.2718523076299388	0.03437669609919419
0.27197499907874445	0.03386649958542301
0.27209777971052734	0.033355044272966594
0.2722206493143096	0.032842328980254604
0.27234360767976334	0.032328352525905116
0.27246665459720737	0.031813113728724626
0.27258978985760557	0.031296611407706676
0.27271301325256414	0.03077884438203203
0.27283632457432916	0.0302598114710666
0.2729597236157843	0.029739511494362436
0.27308321017044845	0.029217943271655625
0.2732067840324733	0.028695105622866354
0.27333044499664105	0.028170997368097833
0.27345419285836187	0.027645617327636096
0.2735780274136719	0.0271189643219487
0.27370194845923057	0.02659103717168443
0.27382595579231855	0.026061834697672703
0.2739500492108353	0.025531355720922452
0.27407422851329677	0.024999599062622155
0.27419849349883324	0.02446656354413833
0.2743228439671868	0.023932247987015612
0.27444727971870947	0.023396651212975475
0.2745718005543605	0.02285977204391622
0.2746964062757044	0.0223216093019116
0.2748210966849087	0.021782161809210956
0.27494587158474143	0.021241428388237713
0.2750707307785694	0.020699407861589705
0.27519567407035567	0.020156099052037246
0.2753207012646572	0.01961150078252394
0.27544581216662295	0.019065611876164984
0.27557100658199163	0.018518431156247142
0.2756962843170896	0.017969957446227508
0.27582164517882835	0.017420189569733638
0.27594708897470277	0.016869126350561994
0.2760726155127888	0.016316766612678515
0.2761982246017413	0.01576310918021663
0.27632391605079204	0.015208152877477898
0.2764496896697475	0.014651896528930494
0.2765755452689865	0.014094338959209085
0.2767014826594587	0.0135354789931139
0.27682750165268205	0.012975315455610523
0.2769536020607407	0.012413847171828835
0.27707978369628317	0.011851072967062684
0.2772060463725202	0.011286991666769206
0.27733238990322256	0.010721602096568514
0.2774588141027193	0.010154903082242372
0.2775853187858952	0.00958689344973443
0.2777119037681894	0.009017572025149079
0.27783856886559277	0.008446937634751378
0.27796531389464646	0.007874989104965563
0.2780921386724392	0.0073017252623756995
0.2782190430166062	0.006727144933723894
0.27834602674532627	0.006151246945910932
0.27847308967732043	0.005574030125994278
0.27860023163184977	0.004995493301189022
0.2787274524287135	0.004415635298865878
0.2788547518882467	0.0038344549465520322
0.2789821298313191	0.0032519510719290906
0.27910958607933234	0.0026681225028340333
0.2792371204542185	0.0020829680672573014
0.2793647327784381	0.0014964865933431992
0.27949242287497816	0.0009086769093887975
0.2796201905673503	0.0003195378438437535
0.27974803567958884	-0.00027093177469073026
0.2798759580362489	-0.0008627331174616282
0.28000395746240436	-0.0014558673555658957
0.2801320337836466	-0.002050335659949498
0.2802601868260818	-0.00264613920140927
0.28038841641632956	-0.0032432791505926095
0.2805167223815212	-0.003841756677998562
0.28064510454929736	-0.004441572953977721
0.28077356274780674	-0.0050427291487336046
0.28090209680570394	-0.005645226432322237
0.2810307065521477	-0.006249065974653689
0.2811593918167992	-0.0068542489454914285
0.28128815242982014	-0.007460776514454162
0.28141698822187095	-0.008068649851015061
0.2815458990241092	-0.008677870124503453
0.2816748846681874	-0.009288438504104296
0.2818039449862518	-0.00990035615885941
0.28193307981093996	-0.010513624257667664
0.28206228897537955	-0.011128243969285856
0.2821915723131864	-0.011744216462328247
0.2823209296584628	-0.012361542905268585
0.2824503608457954	-0.012980224466439122
0.28257986571025423	-0.013600262314032205
0.2827094440873902	-0.014221657616099836
0.2828390958132338	-0.014844411540555394
0.2829688207242935	-0.015468525255172491
0.2830986186575537	-0.016093999927587282
0.2832284894504732	-0.016720836725297283
0.28335843294098356	-0.017349036815663105
0.28348844896748737	-0.017978601365908148
0.2836185373688567	-0.018609531543119673
0.28374869798443114	-0.01924182851424866
0.28387893065401637	-0.019875493446110934
0.28400923521788257	-0.020510527505387094
0.28413961151676254	-0.021146931858623513
0.28427005939185024	-0.021784707672232007
0.2844005786847991	-0.022423856112491494
0.2845311692377205	-0.023064378345547087
0.28466183089318187	-0.023706275537411947
0.28479256349420534	-0.024349548853966396
0.28492336688426617	-0.024994199460959696
0.285054240907291	-0.025640228524009323
0.2851851854076561	-0.026287637208602346
0.2853162002301863	-0.026936426680095132
0.2854472852201527	-0.027586598103714596
0.28557844022327206	-0.0282381526445578
0.2857096650857041	-0.02889109146759325
0.2858409596540508	-0.029545415737660494
0.28597232377535464	-0.030201126619471427
0.28610375729709675	-0.030858225277609813
0.28623526006719574	-0.03151671287653306
0.2863668319340059	-0.032176590580570735
0.28649847274631596	-0.03283785955392704
0.28663018235334725	-0.033500520960679736
0.28676196060475245	-0.034164575964781466
0.28689380735061387	-0.03483002573005958
0.2870257224414422	-0.035496871420217305
0.28715770572817456	-0.036165114198833156
0.28728975706217375	-0.036834755229362734
0.2874218762952259	-0.0375057956751373
0.2875540632795397	-0.03817823669936633
0.28768631786774457	-0.038852079465136094
0.2878186399128892	-0.03952732513541146
0.2879510292684402	-0.04020397487303504
0.2880834857882807	-0.04088202984072903
0.2882160093267087	-0.04156149120109408
0.2883485997384358	-0.042242360116611435
0.2884812568785856	-0.04292463774964145
0.2886139806026925	-0.043608325262425654
0.28874677076670013	-0.04429342381708601
0.28887962722695987	-0.044979934575626476
0.28901254984022945	-0.04566785869993169
0.28914553846367197	-0.0463571973517696
0.2892785929548536	-0.0470479516927895
0.2894117131717432	-0.04774012288452467
0.2895448989727101	-0.04843371208839094
0.28967815021652327	-0.04912872046568824
0.2898114667623497	-0.04982514917760028
0.289944848469753	-0.05052299938519579
0.2900782951986922	-0.051222272249428255
0.29021180680952013	-0.051922968931136085
0.29034538316298236	-0.0526250905910438
0.2904790241202156	-0.05332863838976161
0.29061272954274653	-0.05403361348778678
0.2907464992924903	-0.054740017045502756
0.29088033323174944	-0.05544785022318077
0.2910142312232121	-0.05615711418097914
0.2911481931299514	-0.05686781007894477
0.29128221881542327	-0.057579939077012254
0.29141630814346586	-0.0582935023350058
0.29155046097829784	-0.0590085010126378
0.29168467718451724	-0.05972493626951096
0.2918189566271001	-0.06044280926511732
0.29195329917139917	-0.06116212115883955
0.29208770468314266	-0.06188287310995043
0.292222173028433	-0.06260506627761443
0.2923567040737453	-0.06332870182088661
0.29249129768592663	-0.06405378089871457
0.292625953732194	-0.0647803046699371
0.29276067208013395	-0.06550827429328619
0.29289545259770033	-0.06623769092738614
0.29303029515321405	-0.06696855573075479
0.2931651996153609	-0.0677008698618031
0.29330016585319124	-0.06843463447883649
0.2934351937361178	-0.06916985074005376
0.29357028313391526	-0.06990651980354931
0.29370543391671855	-0.07064464282731156
0.2938406459550217	-0.07138422096922488
0.2939759191196768	-0.07212525538706882
0.2941112532818927	-0.0728677472385195
0.29424664831323366	-0.07361169768114843
0.2943821040856184	-0.07435710787242496
0.29451762047131846	-0.07510397896971452
0.2946531973429578	-0.07585231213028051
0.2947888345735107	-0.07660210851128356
0.2949245320363012	-0.07735336926978291
0.2950602896050017	-0.07810609556273551
0.29519610715363176	-0.07886028854699761
0.2953319845565569	-0.07961594937932422
0.2954679216884877	-0.0803730792163701
0.2956039184244782	-0.08113167921468893
0.29573997463992535	-0.08189175053073564
0.2958760902105671	-0.0826532943208644
0.2960122650124819	-0.08341631174133088
0.2961484989220873	-0.08418080394829136
0.29628479181613865	-0.08494677209780377
0.2964211435717283	-0.08571421734582749
0.29655755406628426	-0.08648314084822427
0.2966940231775691	-0.08725354376075767
0.29683055078367887	-0.08802542723909465
0.296967136763042	-0.08879879243880437
0.2971037809944181	-0.08957364051535996
0.2972404833568969	-0.09034997262413762
0.29737724372989727	-0.09112778992041812
0.2975140619931658	-0.09190709355938552
0.29765093802677617	-0.09268788469612979
0.2977878717111275	-0.09347016448564438
0.2979248629269439	-0.09425393408282912
0.29806191155527284	-0.09503919464248835
0.2981990174774843	-0.09582594731933307
0.29833618057526967	-0.09661419326797982
0.2984734007306408	-0.09740393364295183
0.29861067782592887	-0.0981951695986789
0.298748011743783	-0.09898790228949805
0.2988854023671698	-0.09978213286965333
0.299022849579372	-0.10057786249329714
0.299160353263987	-0.10137509231448863
0.2992979133049267	-0.10217382348719664
0.29943552958641584	-0.10297405716529702
0.299573201992991	-0.10377579450257587
0.29971093040949975	-0.10457903665272733
0.2998487147210997	-0.10538378476935567
0.299986554813257	-0.10619004000597437
0.3001244505717461	-0.10699780351600754
0.30026240188264774	-0.10780707645278867
0.300400408632349	-0.10861785996956289
0.30053847070754147	-0.10943015521948539
0.3006765879952207	-0.11024396335562314
0.30081476038268484	-0.11105928553095391
0.30095298775753415	-0.11187612289836785
0.30109127000766944	-0.11269447661066666
0.30122960702129165	-0.11351434782056478
0.3013679986869001	-0.11433573768068869
0.30150644489329254	-0.11515864734357834
0.30164494552956317	-0.11598307796168625
0.3017835004851024	-0.116809030687379
0.3019221096495953	-0.11763650667293624
0.30206077291302114	-0.11846550707055223
0.30219949016565223	-0.11929603303233469
0.30233826129805275	-0.12012808571030695
0.30247708620107805	-0.120961666256406
0.3026159647658738	-0.12179677582248487
0.3027548968838747	-0.12263341556031118
0.3028938824468037	-0.12347158662156907
0.3030329213466711	-0.12431129015785738
0.3031720134757737	-0.12515252732069226
0.3033111587266936	-0.1259952992615055
0.3034503569922976	-0.12683960713164616
0.30358960816573577	-0.12768545208237952
0.30372891214044123	-0.12853283526488912
0.3038682688101286	-0.12938175783027492
0.3040076780687934	-0.1302322209295556
0.30414713981071123	-0.13108422571366696
0.3042866539304364	-0.1319377733334638
0.30442622032280164	-0.13279286493971876
0.3045658388829168	-0.13364950168312406
0.30470550950616776	-0.13450768471429014
0.3048452320882163	-0.13536741518374762
0.3049850065249985	-0.13622869424194584
0.3051248327127239	-0.13709152303925468
0.3052647105478751	-0.1379559027259633
0.30540463992720635	-0.13882183445228202
0.3055446207477431	-0.139689319368341
0.30568465290678065	-0.1405583586241918
0.3058247363018839	-0.14142895336980654
0.30596487083088586	-0.1423011047550792
0.30610505639188706	-0.1431748139298247
0.30624529288325486	-0.14405008204378056
0.3063855802036224	-0.14492691024660537
0.3065259182518877	-0.14580529968788097
0.30666630692721253	-0.14668525151711123
0.3068067461290227	-0.1475667668837229
0.30694723575700567	-0.14844984693706587
0.30708777571111096	-0.14933449282641315
0.30722836589154845	-0.15022070570096105
0.3073690061987881	-0.1511084867098302
0.30750969653355886	-0.15199783700206518
0.307650436796848	-0.1528887577266341
0.3077912268899001	-0.1537812500324303
0.30793206671421625	-0.15467531506827129
0.3080729561715534	-0.15557095398289994
0.30821389516392345	-0.1564681679249838
0.3083548835935924	-0.1573669580431165
0.30849592136307935	-0.15826732548581668
0.30863700837515634	-0.15916927140152917
0.3087781445328468	-0.16007279693862456
0.308919329739425	-0.1609779032454005
0.30906056389841563	-0.16188459147008014
0.3092018469135924	-0.16279286276081456
0.3093431786889776	-0.16370271826568092
0.3094845591288413	-0.16461415913268423
0.3096259881377005	-0.1655271865097562
0.30976746562031837	-0.16644180154475738
0.30990899148170326	-0.1673580053854752
0.3100505656271085	-0.16827579917962585
0.31019218796203074	-0.16919518407485323
0.3103338583922101	-0.17011616121873085
0.3104755768236288	-0.17103873175875967
0.3106173431625107	-0.17196289684237107
0.31075915731532006	-0.17288865761692448
0.3109010191887617	-0.17381601522970958
0.31104292868977895	-0.1747449708279452
0.3111848857255543	-0.17567552555878058
0.31132689020350757	-0.17660768056929443
0.3114689420312957	-0.1775414370064964
0.31161104111681176	-0.1784767960173262
0.31175318736818436	-0.1794137587486546
0.31189538069377687	-0.18035232634728307
0.3120376210021867	-0.1812924999599445
0.3121799082022443	-0.1822342807333029
0.312322242203013	-0.18317766981395417
0.31246462291378774	-0.1841226683484254
0.31260705024409446	-0.18506927748317697
0.31274952410368967	-0.18601749836459974
0.31289204440255936	-0.1869673321390185
0.3130346110509184	-0.1879187799526894
0.31317722395921005	-0.18887184295180298
0.3133198830381048	-0.18982652228248098
0.3134625881985002	-0.19078281909078007
0.31360533935151963	-0.19174073452268897
0.31374813640851196	-0.1927002697241311
0.3138909792810504	-0.19366142584096296
0.3140338678809327	-0.19462420401897604
0.3141768021201793	-0.19558860540389472
0.31431978191103355	-0.1965546311413791
0.31446280716596037	-0.19752228237702316
0.31460587779764626	-0.19849156025635625
0.3147489937189978	-0.19946246592484218
0.31489215484314154	-0.2004350005278807
0.31503536108342317	-0.2014091652108062
0.3151786123534069	-0.2023849611188895
0.31532190856687436	-0.20336238939733636
0.31546524963782463	-0.20434145119128955
0.3156086354804731	-0.20532214764582732
0.3157520660092507	-0.2063044799059645
0.31589554113880375	-0.20728844911665256
0.31603906078399274	-0.20827405642278016
0.3161826248598919	-0.20926130296917192
0.31632623328178866	-0.21025018990059088
0.3164698859651829	-0.21124071836173636
0.31661358282578606	-0.21223288949724567
0.3167573237795208	-0.21322670445169398
0.3169011087425205	-0.21422216436959451
0.31704493763112784	-0.2152192703953976
0.31718881036189506	-0.21621802367349327
0.31733272685158276	-0.21721842534820898
0.3174766870171595	-0.21822047656381133
0.3176206907758009	-0.21922417846450548
0.3177647380448894	-0.22022953219443636
0.3179088287420134	-0.22123653889768646
0.3180529627849665	-0.22224519971827955
0.3181971400917469	-0.22325551580017772
0.31834136058055723	-0.22426748828728355
0.31848562416980325	-0.22528111832343883
0.3186299307780937	-0.22629640705242618
0.3187742803242396	-0.22731335561796773
0.3189186727272534	-0.22833196516372703
0.31906310790634834	-0.2293522368333072
0.31920758578093855	-0.23037417177025316
0.3193521062706375	-0.23139777111804996
0.3194966692952578	-0.23242303602012476
0.3196412747748107	-0.23344996761984496
0.31978592262950545	-0.23447856706052056
0.31993061277974844	-0.23550883548540208
0.3200753451461427	-0.23654077403768337
0.3202201196494877	-0.2375743838604987
0.3203649362107782	-0.23860966609692597
0.32050979475120384	-0.23964662188998428
0.3206546951921488	-0.24068525238263633
0.32079963745519074	-0.24172555871778661
0.3209446214621007	-0.24276754203828305
0.32108964713484206	-0.24381120348691646
0.32123471439557044	-0.24485654420642086
0.3213798231666327	-0.2459035653394736
0.3215249733705664	-0.24695226802869605
0.3216701649300997	-0.24800265341665242
0.32181539776815005	-0.24905472264585143
0.32196067180782423	-0.2501084768587458
0.32210598697241744	-0.25116391719773246
0.32225134318541265	-0.25222104480515223
0.3223967403704806	-0.2532798608232915
0.32254217845147864	-0.25434036639438007
0.3226876573524503	-0.2554025626605936
0.3228331769976249	-0.2564664507640522
0.32297873731141696	-0.25753203184682183
0.32312433821842523	-0.2585993070509127
0.3232699796434329	-0.25966827751828203
0.3234156615114064	-0.260738944390831
0.32356138374749516	-0.2618113088104081
0.32370714627703084	-0.2628853719188067
0.323852949025527	-0.2639611348577671
0.32399879191867853	-0.26503859876897534
0.32414467488236093	-0.2661177647940644
0.32429059784262987	-0.2671986340746132
0.3244365607257208	-0.26828120775214837
0.32458256345804815	-0.2693654869681424
0.3247286059662049	-0.2704514728640157
0.32487468817696225	-0.27153916658113525
0.3250208100172687	-0.272628569260816
0.32516697141424955	-0.2737196820443199
0.3253131722952071	-0.27481250607285707
0.3254594125876191	-0.27590704248758513
0.3256056922191389	-0.27700329242960964
0.3257520111175945	-0.27810125703998445
0.32589836921098836	-0.2792009374597117
0.32604476642749697	-0.28030233482974215
0.3261912026954697	-0.28140545029097447
0.32633767794342916	-0.2825102849842571
0.3264841921000699	-0.283616840050386
0.3266307450942583	-0.2847251166301077
0.32677733685503224	-0.2858351158641164
0.3269239673116	-0.28694683889305694
0.3270706363933403	-0.2880602868575224
0.3272173440298015	-0.2891754608980568
0.3273640901507013	-0.2902923621551525
0.32751087468592605	-0.2914109917692531
0.3276576975655302	-0.2925313508807509
0.3278045587197363	-0.2936534406299897
0.3279514580789337	-0.29477726215726247
0.3280983955736788	-0.29590281660281376
0.32824537113469415	-0.29703010510683736
0.328392384692868	-0.29815912880947965
0.32853943617925385	-0.29928988885083574
0.32868652552507027	-0.3004223863709537
0.3288336526616996	-0.3015566225098315
0.32898081752068836	-0.30269259840741924
0.3291280200337464	-0.3038303152036175
0.3292752601327464	-0.30496977403827974
0.3294225377497231	-0.30611097605121
0.3295698528168735	-0.30725392238216503
0.32971720526655585	-0.3083986141708528
0.32986459503128945	-0.3095450525569342
0.3300120220437538	-0.31069323868002147
0.3301594862367887	-0.31184317367968045
0.3303069875433933	-0.31299485869542826
0.33045452589672586	-0.3141482948667357
0.33060210123010325	-0.31530348333302566
0.33074971347700044	-0.3164604252336748
0.33089736257105	-0.31761912170801165
0.3310450484460419	-0.3187795738953192
0.3311927710359226	-0.31994178293483305
0.33134053027479493	-0.32110574996574276
0.3314883260969177	-0.32227147612719065
0.331636158436705	-0.32343896255827387
0.3317840272287257	-0.3246082103980425
0.3319319324077033	-0.3257792207855014
0.33207987390851534	-0.3269519948596087
0.33222785166619284	-0.32812653375927786
0.33237586561591986	-0.32930283862337545
0.33252391569303347	-0.33048091059072404
0.33267200183302253	-0.3316607508000992
0.332820123971528	-0.33284236039023263
0.33296828204434203	-0.3340257404998102
0.333116475987408	-0.3352108922674732
0.3332647057368192	-0.33639781683181763
0.33341297122881947	-0.3375865153313955
0.33356127239980193	-0.33877698890471314
0.3337096091863091	-0.3399692386902333
0.333857981525032	-0.3411632658263739
0.3340063893528103	-0.34235907145150907
0.3341548326066311	-0.3435566567039683
0.3343033112236292	-0.34475602272203765
0.33445182514108646	-0.3459571706439587
0.3346003742964314	-0.34716010160793015
0.3347489586272383	-0.348364816752106
0.3348975780712278	-0.3495713172145979
0.3350462325662653	-0.350779604133473
0.33519492205036155	-0.35198967864675657
0.3353436464616715	-0.353201541892429
0.3354924057384944	-0.35441519500842944
0.33564119981927304	-0.3556306391326527
0.33579002864259344	-0.3568478754029521
0.33593889214718453	-0.3580669049571369
0.3360877902719177	-0.3592877289329753
0.33623672295580626	-0.3605103484681918
0.33638569013800523	-0.3617347647004699
0.33653469175781076	-0.3629609787674492
0.3366837277546599	-0.3641889918067295
0.33683279806812993	-0.365418804955866
0.3369819026379385	-0.3666504193523746
0.33713104140394223	-0.36788383613372755
0.33728021430613764	-0.3691190564373567
0.3374294212846595	-0.3703560814006518
0.33757866227978134	-0.37159491216096174
0.33772793723191447	-0.3728355498555935
0.33787724608160796	-0.37407799562181343
0.33802658876954805	-0.37532225059684643
0.33817596523655774	-0.3765683159178771
0.3383253754235966	-0.3778161927220486
0.3384748192717602	-0.3790658821464641
0.33862429672227967	-0.38031738532818465
0.3387738077165217	-0.3815707034042334
0.3389233521959875	-0.3828258375115905
0.33907293010231315	-0.3840827887871977
0.33922254137726854	-0.38534155836795536
0.33937218596275753	-0.38660214739072507
0.3395218638008173	-0.387864556992327
0.3396715748336179	-0.3891287883095432
0.3398213190034622	-0.3903948424791144
0.33997109625278504	-0.39166272063774316
0.34012090652415344	-0.39293242392209116
0.34027074976026583	-0.394203953468782
0.3404206259039514	-0.395477310414399
0.34057053489817046	-0.3967524958954873
0.3407204766860137	-0.39802951104855155
0.34087045121070164	-0.39930835701005946
0.3410204584155845	-0.4005890349164377
0.3411704982441419	-0.4018715459040763
0.34132057063998217	-0.4031558911093247
0.3414706755468423	-0.4044420716684954
0.3416208129085874	-0.4057300887178612
0.3417709826692107	-0.4070199433936581
0.34192118477283234	-0.4083116368320822
0.3420714191637001	-0.40960517016929265
0.34222168578618817	-0.4109005445414102
0.3423719845847973	-0.4121977610845179
0.3425223155041542	-0.4134968209346602
0.3426726784890114	-0.41479772522784536
0.34282307348424657	-0.4161004751000423
0.34297350043486247	-0.41740507168718405
0.3431239592859865	-0.4187115161251649
0.3432744499828702	-0.4200198095498431
0.34342497247088927	-0.42132995309703813
0.3435755266955429	-0.42264194790253423
0.34372611260245345	-0.4239557951020771
0.3438767301373662	-0.42527149583137663
0.3440273792461491	-0.42658905122610485
0.3441780598747922	-0.4279084624218985
0.3443287719694075	-0.4292297305543563
0.3444795154762283	-0.43055285675904137
0.3446302903416094	-0.43187784217147995
0.3447810965120263	-0.4332046879271625
0.34493193393407506	-0.43453339516154255
0.3450828025544719	-0.4358639650100382
0.3452337023200529	-0.43719639860803144
0.34538463317777357	-0.4385306970908676
0.34553559507470866	-0.4398668615938576
0.34568658795805196	-0.441204893252275
0.34583761177511546	-0.4425447932013592
0.3459886664733295	-0.4438865625763129
0.34613975200024233	-0.44523020251230433
0.3462908683035197	-0.4465757141444653
0.3464420153309444	-0.44792309860789403
0.34659319303041647	-0.4492723570376512
0.34674440134995216	-0.45062349056876494
0.3468956402376841	-0.4519765003362266
0.34704690964186097	-0.4533313874749937
0.3471982095108468	-0.454688153119988
0.3473495397931211	-0.45604679840609813
0.3475009004372782	-0.4574073244681762
0.3476522913920273	-0.4587697324410414
0.3478037126061916	-0.4601340234594774
0.34795516402870846	-0.4615001986582347
0.34810664560862914	-0.4628682591720281
0.348258157295118	-0.46423820613553973
0.34840969903745256	-0.46561004068341644
0.3485612707850233	-0.4669837639502724
0.3487128724873328	-0.46835937707068637
0.348864504093996	-0.4697368811792048
0.3490161655547397	-0.4711162774103393
0.34916785681940216	-0.47249756689856903
0.3493195778379328	-0.47388075077833813
0.34947132856039215	-0.4752658301840591
0.3496231089369512	-0.47665280625010936
0.34977491891789125	-0.47804168011083453
0.3499267584536037	-0.47943245290054587
0.3500786274945896	-0.48082512575352276
0.3502305259914595	-0.48221969980401036
0.3503824538949327	-0.4836161761862224
0.3505344111558379	-0.48501455603433785
0.3506863977251119	-0.486414840482505
0.3508384135537997	-0.4878170306648378
0.3509904585930545	-0.48922112771541887
0.35114253279413693	-0.4906271327682975
0.3512946361084149	-0.4920350469574918
0.35144676848736356	-0.49344487141698545
0.3515989298825647	-0.49485660728073244
0.3517511202457065	-0.4962702556826526
0.35190333952858355	-0.4976858177566352
0.35205558768309597	-0.4991032946365361
0.35220786466124976	-0.5005226874561807
0.3523601704151561	-0.5019439973493613
0.3525125048970314	-0.5033672254498404
0.3526648680591964	-0.5047923728913458
0.35281725985407664	-0.5062194408075772
0.3529696802342016	-0.5076484303322001
0.3531221291522051	-0.5090793425988505
0.35327460656082377	-0.5105121787411318
0.3534271124128983	-0.5119469398926167
0.3535796466613722	-0.5133836271868467
0.3537322092592915	-0.5148222417573332
0.3538848001598051	-0.5162627847375543
0.3540374193161639	-0.5177052572609597
0.3541900666817207	-0.5191496604609666
0.3543427422099301	-0.5205959954709625
0.354495445854348	-0.5220442634243031
0.35464817756863154	-0.5234944654543151
0.35480093730653833	-0.5249466026942934
0.3549537250219272	-0.526400676277503
0.35510654066875663	-0.5278566873371783
0.35525938420108555	-0.5293146370065239
0.35541225557307243	-0.5307745264187131
0.35556515473897543	-0.5322363567068913
0.3557180816531516	-0.5337001290041713
0.35587103627005745	-0.5351658444436379
0.3560240185442477	-0.5366335041583444
0.3561770284303758	-0.538103109281316
0.3563300658831932	-0.5395746609455471
0.3564831308575495	-0.5410481602840025
0.3566362233083916	-0.5425236084296177
0.356789343190764	-0.5440010065152987
0.35694249045980825	-0.5454803556739216
0.35709566507076296	-0.5469616570383347
0.3572488669789628	-0.5484449117413542
0.35740209613983953	-0.5499301209157708
0.3575553525089203	-0.5514172856943421
0.35770863604182856	-0.5529064072098004
0.3578619466942832	-0.5543974865948461
0.3580152844220983	-0.5558905249821529
0.3581686491811832	-0.5573855235043634
0.3583220409275419	-0.5588824832940941
0.358475459617273	-0.5603814054839303
0.35862890520656954	-0.561882291206431
0.35878237765171844	-0.5633851415941243
0.3589358769091005	-0.5648899577795125
0.3590894029351901	-0.5663967408950669
0.3592429556865548	-0.5679054920732324
0.3593965351198555	-0.5694162124464245
0.3595501411918456	-0.5709289031470317
0.3597037738593712	-0.5724435653074128
0.35985743307937085	-0.5739602000599006
0.36001111880887504	-0.5754788085367976
0.36016483100500607	-0.5769993918703807
0.3603185696249779	-0.5785219511928975
0.3604723346260959	-0.5800464876365686
0.3606261259657564	-0.5815730023335861
0.36077994360144666	-0.5831014964161159
0.3609337874907446	-0.5846319710162946
0.36108765759131856	-0.5861644272662332
0.36124155386092693	-0.5876988662980136
0.36139547625741825	-0.589235289243692
0.36154942473873025	-0.5907736972352957
0.36170339926289063	-0.5923140914048264
0.36185739978801595	-0.593856472884257
0.36201142627231203	-0.5954008428055357
0.36216547867407306	-0.5969472023005808
0.3623195569516821	-0.5984955525012866
0.36247366106361023	-0.600045894539518
0.36262779096841663	-0.6015982295471152
0.36278194662474833	-0.6031525586558902
0.36293612799134	-0.6047088829976296
0.3630903350270135	-0.6062672037040918
0.36324456769067787	-0.6078275219070108
0.3633988259413291	-0.6093898387380925
0.36355310973804983	-0.6109541553290174
0.363707419040009	-0.6125204728114386
0.36386175380646196	-0.6140887923169845
0.3640161139967499	-0.6156591149772559
0.3641704995702999	-0.6172314419238282
0.36432491048662435	-0.6188057742882502
0.3644793467053212	-0.6203821132020463
0.3646338081860735	-0.621960459796713
0.36478829488864883	-0.6235408152037221
0.36494280677289986	-0.6251231805545194
0.36509734379876335	-0.6267075569805244
0.36525190592626045	-0.6282939456131323
0.3654064931154961	-0.6298823475837113
0.3655611053266595	-0.6314727640236049
0.3657157425200226	-0.6330651960641306
0.36587040465594145	-0.6346596448365812
0.36602509169485475	-0.6362561114722236
0.3661798035972843	-0.6378545971022997
0.3663345403238346	-0.6394551028580256
0.3664893018351926	-0.6410576298705937
0.36664408809212734	-0.642662179271169
0.36679889905549	-0.6442687521908943
0.36695373468621384	-0.6458773497608848
0.36710859494531345	-0.6474879731122328
0.36726347979388474	-0.6491006233760046
0.36741838919310527	-0.6507153016832423
0.36757332310423313	-0.6523320091649627
0.3677282814886074	-0.6539507469521589
0.3678832643076478	-0.6555715161757978
0.36803827152285423	-0.6571943179668243
0.3681933030958069	-0.6588191534561558
0.3683483589881657	-0.660446023774688
0.3685034391616707	-0.6620749300532904
0.36865854357814126	-0.6637058734228097
0.36881367219947603	-0.6653388550140666
0.3689688249876529	-0.6669738759578594
0.3691240019047285	-0.6686109373849607
0.36927920291283844	-0.6702500404261208
0.3694344279741967	-0.6718911862120641
0.3695896770510957	-0.6735343758734929
0.3697449501059056	-0.6751796105410842
0.3699002471010751	-0.676826891345492
0.3700555679991301	-0.6784762194173463
0.3702109127626742	-0.6801275958872534
0.37036628135438837	-0.6817810218857956
0.37052167373703065	-0.6834364985435327
0.370677089873436	-0.6850940269909996
0.37083252972651604	-0.686753608358709
0.370987993259259	-0.6884152437771495
0.37114348043472956	-0.690078934376786
0.3712989912160683	-0.6917446812880607
0.37145452556649194	-0.6934124856413931
0.37161008344929286	-0.6950823485671775
0.3717656648278389	-0.696754271195788
0.37192126966557354	-0.6984282546575729
0.37207689792601517	-0.7001043000828595
0.37223254957275725	-0.7017824086019508
0.3723882245694682	-0.7034625813451276
0.3725439228798907	-0.7051448194426473
0.3726996444678422	-0.7068291240247457
0.372855389297214	-0.708515496221634
0.3730111573319719	-0.7102039371635027
0.37316694853615506	-0.7118944479805184
0.3733227628738766	-0.7135870298028257
0.37347860030932306	-0.7152816837605463
0.3736344608067542	-0.7169784109837798
0.3737903443305029	-0.7186772126026026
0.373946250844975	-0.7203780897470708
0.3741021803146491	-0.7220810435472153
0.3742581327040761	-0.7237860751330475
0.3744141079778796	-0.7254931856345543
0.3745701061007552	-0.7272023761817028
0.37472612703747044	-0.7289136479044356
0.3748821707528649	-0.7306270019326755
0.3750382372118495	-0.7323424393963213
0.3751943263794068	-0.7340599614252518
0.37535043822059055	-0.7357795691493221
0.3755065727005259	-0.7375012636983678
0.3756627297844082	-0.7392250462021995
0.37581890943750423	-0.7409509177906097
0.3759751116251511	-0.7426788795933665
0.3761313363127562	-0.7444089327402178
0.3762875834657971	-0.746141078360889
0.3764438530498217	-0.7478753175850859
0.37660014503044736	-0.7496116515424898
0.37675645937336133	-0.7513500813627633
0.3769127960443203	-0.7530906081755464
0.3770691550091505	-0.7548332331104588
0.37722553623374677	-0.7565779572970972
0.37738193968407346	-0.7583247818650388
0.37753836532616347	-0.7600737079438384
0.3776948131261184	-0.7618247366630319
0.3778512830501084	-0.7635778691521302
0.3780077750643717	-0.7653331065406278
0.3781642891352147	-0.7670904499579948
0.3783208252290119	-0.7688499005336829
0.37847738331220543	-0.7706114593971201
0.37863396335130517	-0.7723751276777167
0.37879056531288813	-0.7741409065048601
0.37894718916359893	-0.7759087970079184
0.3791038348701492	-0.7776788003162376
0.3792605023993174	-0.7794509175591446
0.3794171917179489	-0.7812251498659448
0.3795739027929556	-0.7830014983659234
0.3797306355913157	-0.7847799641883455
0.37988739008007394	-0.7865605484624553
0.38004416622634096	-0.7883432523174763
0.38020096399729353	-0.7901280768826133
0.38035778336017395	-0.7919150232870488
0.3805146242822903	-0.7937040926599468
0.3806714867310162	-0.7954952861304498
0.3808283706737903	-0.7972886048276816
0.3809852760781165	-0.7990840498807448
0.3811422029115638	-0.8008816224187222
0.3812991511417657	-0.802681323570677
0.3814561207364208	-0.8044831544656528
0.3816131116632917	-0.8062871162326716
0.3817701238902056	-0.8080932100007381
0.38192715738505384	-0.8099014368988351
0.38208421211579174	-0.8117117980559272
0.3822412880504384	-0.8135242946009581
0.38239838515707664	-0.8153389276628531
0.3825555034038529	-0.8171556983705164
0.38271264275897704	-0.8189746078528344
0.38286980319072184	-0.8207956572386719
0.38302698466742346	-0.8226188476568767
0.3831841871574809	-0.8244441802362752
0.3833414106293558	-0.8262716561056757
0.38349865505157243	-0.8281012763938661
0.3836559203927177	-0.8299330422296161
0.3838132066214404	-0.8317669547416755
0.3839705137064521	-0.8336030150587754
0.38412784161652563	-0.835441224309627
0.38428519032049613	-0.8372815836229233
0.38444255978726033	-0.8391240941273382
0.38459994998577635	-0.8409687569515255
0.38475736088506396	-0.8428155732241216
0.38491479245420374	-0.8446645440737427
0.3850722446623379	-0.8465156706289874
0.3852297174786691	-0.8483689540184335
0.3853872108724609	-0.8502243953706424
0.38554472481303775	-0.8520819958141552
0.38570225926978424	-0.8539417564774953
0.38585981421214555	-0.8558036784891659
0.3860173896096268	-0.8576677629776536
0.38617498543179346	-0.8595340110714248
0.38633260164827066	-0.8614024238989288
0.38649023822874323	-0.8632730025885951
0.38664789514295594	-0.8651457482688355
0.3868055723607127	-0.8670206620680433
0.38696326985187673	-0.8688977451145942
0.38712098758637076	-0.8707769985368434
0.3872787255341761	-0.8726584234631305
0.38743648366533323	-0.8745420210217748
0.38759426194994123	-0.8764277923410794
0.3877520603581579	-0.8783157385493273
0.38790987886019934	-0.8802058607747851
0.3880677174263401	-0.8820981601456996
0.3882255760269129	-0.8839926377903016
0.3883834546323083	-0.8858892948368021
0.38854135321297495	-0.8877881324133955
0.3886992717394192	-0.889689151648257
0.3888572101822049	-0.8915923536695461
0.38901516851195345	-0.8934977396054024
0.3891731466993437	-0.8954053105839487
0.3893311447151114	-0.8973150677332897
0.3894891625300496	-0.8992270121815131
0.38964720011500814	-0.9011411450566882
0.3898052574408937	-0.9030574674868672
0.3899633344786696	-0.9049759806000841
0.3901214311993556	-0.906896685524357
0.39027954757402783	-0.9088195833876844
0.3904376835738187	-0.910744675318049
0.3905958391699167	-0.912671962443415
0.3907540143335663	-0.9146014458917304
0.39091220903606777	-0.9165331267909242
0.391070423248777	-0.9184670062689111
0.39122865694310544	-0.9204030854535843
0.39138691009052023	-0.9223413654728241
0.3915451826625433	-0.9242818474544905
0.39170347463075234	-0.9262245325264283
0.3918617859667795	-0.9281694218164643
0.39202011664231223	-0.930116516452409
0.3921784666290925	-0.9320658175620544
0.392336835898917	-0.9340173262731778
0.3924952244236368	-0.9359710437135371
0.3926536321751577	-0.9379269710108761
0.3928120591254392	-0.9398851092929186
0.3929705052464954	-0.9418454596873748
0.3931289705103939	-0.9438080233219354
0.3932874548892567	-0.9457728013242764
0.39344595835525903	-0.9477397948220556
0.39360448088063	-0.9497090049429159
0.39376302243765193	-0.9516804328144812
0.3939215829986609	-0.9536540795643615
0.39408016253604566	-0.9556299463201475
0.3942387610222486	-0.9576080342094165
0.39439737842976447	-0.9595883443597264
0.3945560147311413	-0.9615708778986208
0.39471466989897963	-0.9635556359536257
0.39487334390593276	-0.9655426196522513
0.39503203672470616	-0.967531830121991
0.39519074832805773	-0.969523268490323
0.3953494786887977	-0.9715169358847077
0.39550822777978833	-0.9735128334325907
0.39566699557394364	-0.9755109622614003
0.39582578204422986	-0.9775113234985517
0.39598458716366447	-0.9795139182714379
0.3961434109053169	-0.9815187477074416
0.3963022532423078	-0.9835258129339274
0.39646111414780943	-0.9855351150782443
0.396619993595045	-0.9875466552677241
0.39677889155728885	-0.9895604346296836
[truncated: 47,991 more rows]
