# Supplementary material for: Critical Phenomena of Charged AdS Black Holes in Rastall Gravity
Source: Hindawi journal article supplement (doi:10.1155/2020/4065254), 2020-01-24
Supplement: f1 [file 4065254.f1.zip › Fig3(b)-GT3.dat]

2716.6565206739488	-1.6683927808522039
1932.275649234287	-1.3983539784871954
1412.7244018830588	-1.183584771703406
1057.0333896176107	-1.009736400703306
806.6320874626063	-0.8668990814200571
626.0909295500828	-0.748032912559192
493.1986988509507	-0.6480147547794639
393.5946744246803	-0.5630378618031825
317.74067597532485	-0.49022170142484855
259.14978250844706	-0.427351385940127
213.31659706644427	-0.3726994499193482
177.05271195246246	-0.32490134374250274
148.06337973242375	-0.28286679526428565
124.6716892382808	-0.2457156279351441
105.63515621771626	-0.2127305708828789
90.02149429456222	-0.18332207720625604
77.12304437516036	-0.15700176064583807
66.39691904376832	-0.13336210562587947
57.42253870192519	-0.1120608031764278
49.87111130200037	-0.09280853874569023
43.48343067581101	-0.07535938431872327
38.053544798861765	-0.05950317547515774
33.41661661732394	-0.04505941568846518
29.43981335974405	-0.03187236609838886
26.01540662113962	-0.01980706306423763
23.055502270318527	-0.00874606742921547
20.487983040958056	0.001413204960463734
18.25336129229575	0.010760687860156862
16.30232049094343	0.019375495051890602
14.593781872941207	0.027327447773562788
13.093374501939365	0.03467835539465368
11.772217319026453	0.0414830940567384
10.605944068822794	0.0477905190472164
9.573918470501951	0.05364423967834706
8.65859928579897	0.0590832799405711
7.845024155229538	0.06414264384499713
7.120388040503144	0.0688538009054829
6.473697410120039	0.07324510443955096
5.89548536070528	0.07734215313933737
5.377575988955471	0.08116810456375959
4.912888746539409	0.08474394774204982
4.495275392175017	0.08808874088774105
4.1193836276596585	0.09121981924693788
3.7805426626278376	0.09415297730303068
3.474666867785558	0.09690262889837585
3.1981744026348764	0.09948194828533513
2.947918282714582	0.10190299466341356
2.721127814950677	0.10417682237904563
2.5153587023597126	0.10631357864635371
2.328450420086874	0.10832259037997714
2.1584897083793066	0.11021244150596216
2.003779226163168	0.11199104192650429
1.8628105704904527	0.11366568915319882
1.734240999412414	0.11524312348651668
1.6168733044901273	0.11672957750256935
1.5096383686738761	0.11813082050858152
1.4115800192681505	0.11945219854316261
1.3218418470239257	0.12069867042420343
1.2396557133780561	0.12187484028421683
1.1643317103529256	0.12298498697857466
1.095249373147304	0.12403309070510521
1.031849975212637	0.12502285713283992
0.9736297606142728	0.12595773930235502
0.9201339895360832	0.1268409575294532
0.8709516905647199	0.1276755175171404
0.8257110284331937	0.12846422685749304
0.7840752086599245	0.12920971008455126
0.7457388513625745	0.1299144224214646
0.710424775760643	0.13058066234939003
0.677881144762484	0.13121058311179543
0.6478789257730568	0.13180620325566014
0.6202096296348216	0.13236941630029758
0.5946832945723841	0.13290199961504062
0.5711266862770756	0.1334056225786184
0.5493816889424252	0.13388185408560627
0.5293038652338673	0.13433216945871945
0.5107611659192095	0.1347579568198432
0.4936327722621847	0.13516052296745767
0.4778080563425924	0.13554109880346485
0.4631856462577346	0.13590084434824393
0.44967258471866245	0.13624085337906325
0.4371835709131915	0.13656215772363883
0.42564027669415694	0.13686573123764437
0.414970729187802	0.13715249349232173
0.4051087528251429	0.13742331319591655
0.39599346459486995	0.13767901137052677
0.3875688170148841	0.1379203643039913
0.3797831839336041	0.1381481062947121
0.37258898481270997	0.13836293220570922
0.3659423436193041	0.1385654998427888
0.35980277887556333	0.13875643217042397
0.3541329217856841	0.13893631937776435
0.3488982596878323	0.13910572080614658
0.34406690237008064	0.1392651667485223
0.3396093690468902	0.13941516013034058
0.3354983940217551	0.1395561780806449
0.3317087492647133	0.13968867340141392
0.32821708231461066	0.139813075942538
0.32500176807676695	0.1399297938892155
0.3220427732304696	0.14003921496801838
0.31932153208865266	0.14014170757737895
0.31682083286661467	0.14023762184780147
0.31452471341884447	0.14032729063668564
0.3124183655945725	0.1404110304622753
0.31048804744464764	0.14048914238089863
0.30872100258578516	0.14056191281135083
0.3071053860942561	0.14062961430997797
0.30563019636023725	0.14069250629976257
0.30428521238734785	0.14075083575645297
0.303060936069774	0.14080483785457
0.3019485390225185	0.14085473657590986
0.3009398135791601	0.1409007452829717
0.30002712760664796	0.14094306725956834
0.29920338281815706	0.14098189622071705
0.2984619762938081	0.14101741679375157
0.29779676494469864	0.14104980497247624
0.2972020326792162	0.14107922854603527
0.2966724600517221	0.14110584750407526
0.29620309619286367	0.14112981441965355
0.29578933283815534	0.14115127481126
0.29542688028733544	0.14117036748521467
0.2951117451411678	0.1411872248596292
0.29484020967554336	0.1412019732710356
0.2946088127244648	0.14121473326471184
0.2944143319543091	0.14122561986967055
0.29425376742154086	0.14123474285921034
0.29412432631499996	0.14124220699786955
0.2940234087920137	0.14124811227557457
0.2939485948250242	0.14125255412971643
0.2938976319821611	0.14125562365584812
0.293868424071416	0.1412574078076479
0.29385902058372837	0.1412579895867585
0.29386760687540026	0.1412574482230642
0.2938924950350912	0.14125585934594562
0.2939321153848766	0.1412532951470085
0.293985008568852	0.14124982453475798
0.2940498181864246	0.14124551328165852
0.2941252839307209	0.14124042416399502
0.29421023519560974	0.14123461709492482
0.2943035851176594	0.14122814925108468
0.2944043250218842	0.14122107519310134
0.2945115192425414	0.14121344698032684
0.2946243002923947	0.14120531428010424
0.2947418643558364	0.1411967244718539
0.29486346708315425	0.1411877227462477
0.2949884196648589	0.1411783521997285
0.2951160851665988	0.14116865392461572
0.2952458751065956	0.14115866709502295
0.2953772462588602	0.1411484290488022
0.29550969766667556	0.14113797536571687
0.29564276785198196	0.14112733994203552
0.2957760322072689	0.14111655506172277
0.2959091005576351	0.14110565146440268
0.29604161488148373	0.14109465841025184
0.2961732471791727	0.14108360374197557
0.2963036974797073	0.14107251394400966
0.296432691976245	0.141061414199087
0.2965599812818298	0.14105032844229243
0.2966853387973849	0.14103927941273367
0.2968085591845466	0.14102828870293804
0.29692945693642914	0.14101737680608775
0.2970478650398869	0.14100656316119758
0.29716363372329946	0.14099586619632776
0.297276629284295	0.1409853033699324
0.2973867329922073	0.14097489121042595
0.29749384006044366	0.14096464535405306
0.2975978586842283	0.14095458058114205
0.29769870913952334	0.14094471085081434
0.2977963229391858	0.1409350493342254
0.29789064204271276	0.14092560844640062
0.29798161811612855	0.14091639987673363
0.29806921183884794	0.14090743461820598
0.298153392254503	0.14089872299538764
0.2982341361629721	0.14089027469127385
0.2983114275509908	0.14088209877300834
0.2983852570589156	0.1408742037165454
0.29845562148136895	0.14086659743029725
0.2985225232996349	0.1408592872778115
0.2985859702438194	0.14085228009952225
0.29864597488290845	0.14084558223361454
0.29870255424098935	0.14083919953604288
0.298755729438003	0.14083313739973982
0.29880552535350136	0.14082740077304845
0.2988519703119801	0.14082199417741573
0.2988950957884553	0.1408169217243757
0.298934936133026	0.14081218713185417
0.2989715283132488	0.14080779373982422
0.2990049116732274	0.14080374452533953
0.2990351277083887	0.14080004211697322
0.2990622198549724	0.14079668880868607
0.2990862332933337	0.140793686573148
0.2991072147642102	0.14079103707453758
0.2991252123971535	0.1407887416808401
0.2991402755503805	0.1407868014756644
0.299152454661342	0.14078521726960105
0.29916180110735224	0.1407839896111375
0.29916836707566463	0.14078311879715133
0.29917220544240597	0.14078260488299765
0.299173369659836	0.14078244769220724
0.2991719136514126	0.1407826468258112
0.2991678917141961	0.14078320167130925
0.2991613584281204	0.14078411141129146
0.29915236857173355	0.14078537503173455
0.29914097704399367	0.1407869913299779
0.2991272387917542	0.14078895892239887
0.29911120874258235	0.14079127625179463
0.2990929417425915	0.14079394159448597
0.2990724924989655	0.1407969530671506
0.2990499155268952	0.14080030863340004
0.2990252651006453	0.1408040061101074
0.29899859520850147	0.14080804317349757
0.29896995951134975	0.1408124173650086
0.2989394113046684	0.14081712609693353
0.29890700348371024	0.1408221666578503
0.2988727885116832	0.1408275362178493
0.29883681839073506	0.14083323183356541
0.298799144635565	0.1408392504530224
0.29875981824950004	0.14084558892029772
0.29871888970287197	0.1408522439800125
0.2986764089135536	0.14085921228165535
0.29863242522951317	0.14086649038374732
0.29858698741325496	0.14087407475784908
0.29854014362802594	0.1408819617924234
0.2984919414256728	0.14089014779655257
0.2984424277360377	0.1408986290035184
0.298391648857795	0.14090740157425172
0.29833965045062993	0.14091646160065258
0.2982864775286702	0.14092580510878971
0.29823217445508576	0.14093542806198012
0.298176784937777	0.14094532636375812
0.2981203520260738	0.1409554958607314
0.2980629181083796	0.14096593234533544
0.29800452491069074	0.14097663155848428
0.29794521349592884	0.14098758919212434
0.29788502426402896	0.14099880089169486
0.2978239969527292	0.14101026225849747
0.29776217063900523	0.1410219688519781
0.2976995837411084	0.14103391619192568
0.29763627402115633	0.1410460997605893
0.29757227858823354	0.141058515004718
0.29750763390196483	0.14107115733752515
0.29744237577652066	0.14108402214058005
0.2973765393850204	0.14109710476563067
0.2973101592642985	0.1411104005363582
0.2972432693200068	0.14112390475006747
0.29717590283201617	0.1411376126793146
0.29710809246009734	0.1411515195734746
0.29703987024984896	0.14116562066025046
0.2969712676388556	0.14117991114712666
0.2969023154630454	0.1411943862227692
0.2968330439632308	0.14120904105837218
0.2967634827918127	0.14122387080895557
0.29669366101962635	0.14123887061461357
0.29662360714291497	0.14125403560171734
0.29655334909041164	0.14126936088407174
0.2964829142305171	0.14128484156402898
0.2964123293785567	0.1413004727335603
0.2963416208041061	0.14131624947528768
0.2962708142383701	0.14133216686347633
0.2961999348816051	0.14134821996498861
0.29612900741057424	0.14136440384020355
0.29605805598602525	0.1413807135438998
0.2959871042601798	0.1413971441261052
0.29591617538422843	0.14141369063291442
0.2958452920158222	0.14143034810727398
0.2957744763265517	0.14144711158973805
0.2957037500094091	0.14146397611919398
0.29563313428622584	0.14148093673356055
0.2955626499150777	0.1414979884704579
0.2954923171976572	0.14151512636785196
0.2954221559866031	0.14153234546467325
0.29535218569278443	0.14154964080141055
0.29528242529253484	0.14156700742068212
0.2952128933348335	0.14158444036778256
0.2951436079484279	0.14160193469120883
0.2950745868488971	0.1416194854431647
0.2950058473456509	0.14163708768004415
0.29493740634886173	0.14165473646289523
0.2948692803763301	0.14167242685786513
0.29480148556027747	0.1416901539366261
0.2947340376540661	0.14170791277678402
0.29466695203884596	0.14172569846226957
0.29460024373012417	0.14174350608371272
0.29453392738425715	0.14176133073880115
0.29446801730486427	0.14177916753262315
0.2944025274491624	0.14179701157799615
0.29433747143421923	0.14181485799577953
0.29427286254312457	0.14183270191517472
0.2942087137310826	0.1418505384740112
0.29414503763141825	0.1418683628190196
0.2940818465615035	0.14188617010609256
0.2940191525286001	0.14190395550053292
0.2939569672356189	0.14192171417729071
0.29389530208679626	0.14193944132118852
0.293834168193288	0.1419571321271363
0.2937735763786794	0.1419747818003353
0.2937135371844142	0.14199238555647212
0.29365406087513946	0.14200993862190314
0.2935951574439692	0.1420274362338285
0.2935368366176665	0.14204487364045848
0.29347910786174447	0.14206224610116994
0.2934219803854854	0.14207954888665436
0.29336546314688144	0.14209677727905856
0.2933095648574947	0.14211392657211624
0.29325429398723835	0.14213099207127267
0.29319965876908005	0.14214796909380206
0.29314566720366747	0.1421648529689177
0.2930923270638769	0.1421816390378747
0.29303964589928605	0.14219832265406684
0.2929876310405718	0.14221489918311708
0.29293628960383233	0.14223136400296094
0.2928856284948371	0.14224771250392526
0.29283565441320325	0.14226394008880022
0.29278637385649964	0.1422800421729064
0.29273779312428055	0.14229601418415624
0.29268991832204916	0.14231185156311033
0.2926427553651505	0.14232754976302953
0.2925963099825977	0.14234310424992058
0.2925505877208296	0.14235851050257942
0.29250559394740183	0.1423737640126278
0.2924613338546125	0.14238886028454772
0.29241781246306264	0.14240379483570992
0.2923750346251536	0.14241856319639973
0.29233300502852017	0.1424331609098383
0.29229172819940297	0.14244758353220074
0.292251208505959	0.14246182663263052
0.29221145016151145	0.14247588579324982
0.29217245722774204	0.14248975660916802
0.2921342336178224	0.1425034346884856
0.29209678309949016	0.14251691565229574
0.29206010929806714	0.14253019513468318
0.29202421569942194	0.14254326878271967
0.2919891056528785	0.14255613225645705
0.2919547823740697	0.14256878122891772
0.2919212489477387	0.14258121138608273
0.29188850833048674	0.1425934184268772
0.29185656335347154	0.1426053980631539
0.2918254167250534	0.14261714601967376
0.2917950710333927	0.14262865803408512
0.2917655287489977	0.14263992985690088
0.2917367922272251	0.14265095725147303
0.29170886371073296	0.1426617359939661
0.2916817453318872	0.14267226187332763
0.2916554391151228	0.1426825306912592
0.2916299469792594	0.14269253826218262
0.2916052707397737	0.14270228041320762
0.2915814121110286	0.14271175298409594
0.2915583727084587	0.14272095182722477
0.29153615405071476	0.14272987280754904
0.2915147575617678	0.14273851180256175
0.2914941845729716	0.14274686470225337
0.29147443632508585	0.14275492740907025
0.2914555139702615	0.14276269583787138
0.2914374185739859	0.14277016591588454
0.2914201511169928	0.14277733358266093
0.29140371249713315	0.14278419479002932
0.29138810353121175	0.1427907455020488
0.29137332495678664	0.1427969816949608
0.29135937743393486	0.14280289935714016
0.29134626154698334	0.14280849448904587
0.2913339778062062	0.14281376310317018
0.2913225266494894	0.14281870122398765
0.29131190844396243	0.1428233048879033
0.29130212348759876	0.14282757014320005
0.2912931720107844	0.1428314930499856
0.29128505417785666	0.14283506968013868
0.291277770088612	0.1428382961172548
0.29127131977978465	0.1428411684565915
0.29126570322649686	0.14284368280501308
0.29126092034367945	0.14284583528093464
0.29125697098746584	0.1428476220142665
0.29125385495655753	0.14284903914635683
0.2912515719935634	0.1428500828299355
0.2912501217863126	0.14285074922905633
0.29124950396914107	0.14285103451903972
0.2912497181241534	0.1428509348864147
0.29125076378245923	0.14285044652886086
0.2912526404253852	0.14284956565514995
0.2912553474856634	0.14284828848508713
0.29125888434859604	0.14284661124945255
0.2912632503531965	0.14284453018994178
0.29126844479330893	0.1428420415591074
0.2912744669187044	0.14283914162029887
0.2912813159361559	0.14283582664760397
0.2912889910104923	0.14283209292578863
0.29129749126563037	0.14282793675023775
0.2913068157855869	0.14282335442689548
0.2913169636154708	0.14281834227220505
0.29132793376245464	0.14281289661304988
0.29133972519672774	0.14280701378669294
0.29135233685242923	0.1428006901407176
0.29136576762856337	0.14279392203296734
0.2913800163898958	0.1427867058314865
0.2913950819678323	0.14277903791446017
0.2914109631612795	0.14277091467015468
0.29142765873748877	0.14276233249685788
0.2914451674328829	0.14275328780281976
0.29146348795386595	0.1427437770061928
0.2914826189776173	0.1427337965349726
0.29150255915286916	0.14272334282693866
0.29152330710066876	0.14271241232959525
0.291544861415125	0.1427010015001121
0.29156722066414004	0.1426891068052658
0.29159038339012594	0.14267672472138077
0.29161434811070724	0.14266385173427065
0.29163911331940867	0.14265048433917998
0.2916646774863294	0.14263661904072547
0.29169103905880317	0.14262225235283832
0.2917181964620455	0.1426073807987057
0.29174614809978733	0.14259200091071353
0.2917748923548959	0.1425761092303883
0.29180442758998293	0.14255970230833992
0.29183475214800025	0.14254277670420434
0.2918658643528237	0.14252532898658687
0.2918977625098246	0.14250735573300488
0.29193044490642933	0.14248885352983148
0.29196390981266845	0.14246981897223898
0.2919981554817135	0.14245024866414302
0.29203318015040297	0.14243013921814632
0.29206898203975784	0.14240948725548302
0.2921055593554862	0.14238828940596354
0.2921429102884776	0.14236654230791887
0.29218103301528686	0.14234424260814615
0.2922199256986083	0.14232138696185342
0.29225958648773975	0.14229797203260552
0.2923000135190373	0.14227399449226963
0.2923412049163604	0.1422494510209616
0.2923831587915076	0.14222433830699188
0.2924258732446434	0.1421986530468123
0.29246934636471633	0.142172391944963
0.2925135762298675	0.14214555171401932
0.292558560907832	0.1421181290745392
0.2926042984563303	0.1420901207550108
0.29265078692345287	0.14206152349180068
0.2926980243480354	0.14203233402910148
0.2927460087600273	0.1420025491188809
0.29279473818085167	0.1419721655208301
0.2928442106237578	0.14194118000231284
0.29289442409416644	0.1419095893383147
0.2929453765900077	0.1418773903113927
0.2929970661020511	0.14184457971162528
0.29304949061423013	0.14181115433656225
0.2931026481039578	0.1417771109911753
0.29315653654243756	0.14174244648780868
0.293211153894966	0.1417071576461303
0.2932664981212297	0.14167124129308295
0.2933225671755959	0.14163469426283576
0.29337935900739637	0.1415975133967362
0.2934368715612056	0.14155969554326217
0.29349510277711266	0.1415212375579746
0.2935540505909875	0.1414821363034696
0.293613712934741	0.14144238864933226
0.29367408773658	0.1414019914720894
0.29373517292125595	0.14136094165516322
0.29379696641030895	0.1413192360888254
0.29385946612230607	0.14127687167015102
0.293922669973074	0.14123384530297287
0.2939865758759274	0.14119015389783662
0.2940511817418918	0.14114579437195562
0.29411648547992125	0.14110076364916602
0.29418248499711164	0.14105505865988233
0.29424917819890917	0.14100867634105382
0.2943165629893139	0.14096161363611995
0.29438463727107894	0.14091386749496737
0.29445339894590516	0.1408654348738863
0.2945228459146318	0.1408163127355275
0.2945929760774217	0.14076649804886
0.2946637873339438	0.14071598778912797
0.2947352775835508	0.14066477893780924
0.29480744472545195	0.14061286848257265
0.2948802866588837	0.14056025341723744
0.2949538012832747	0.1405069307417309
0.29502798649840806	0.14045289746204803
0.29510284020457955	0.1403981505902103
0.2951783603027516	0.14034268714422554
0.2952545446947049	0.14028650414804733
0.29533139128318536	0.14022959863153533
0.295408897972048	0.14017196763041542
0.29548706266639757	0.14011360818624038
0.29556588327272587	0.1400545173463505
0.2956453576990453	0.13999469216383517
0.29572548385502	0.1399341296974937
0.29580625965209323	0.13987282701179732
0.29588768300361207	0.13981078117685097
0.2959697518249488	0.13974798926835547
0.2960524640336193	0.13968444836757005
0.2961358175493993	0.13962015556127486
0.2962198102944368	0.13955510794173404
0.29630444019336205	0.13948930260665893
0.2963897051733952	0.13942273665917135
0.2964756031644508	0.13935540720776773
0.29656213209924004	0.13928731136628253
0.2966492899133698	0.13921844625385293
0.2967370745454401	0.13914880899488308
0.29682548393713853	0.1390783967190087
0.296914516033332	0.13900720656106247
0.29700416878215685	0.13893523566103877
0.29709444013510605	0.1388624811640594
0.29718532804711434	0.13878894022033927
0.2972768304766413	0.13871460998515228
0.29736894538575165	0.13863948761879752
0.29746167074019436	0.13856357028656582
0.2975550045094788	0.13848685515870615
0.297648944666949	0.1384093394103928
0.2977434891898564	0.1383310202216923
0.29783863605942995	0.13825189477753103
0.2979343832609449	0.13817196026766257
0.29803072878378906	0.13809121388663567
0.29812767062152773	0.13800965283376243
0.2982252067719665	0.1379272743130862
0.29832333523721244	0.13784407553335054
0.2984220540237333	0.1377600537079679
0.29852136114241534	0.13767520605498823
0.2986212546086192	0.13758952979706845
0.29872173244223427	0.13750302216144206
0.29882279266773104	0.13741568037988838
0.2989244333142129	0.1373275016887025
0.29902665241546517	0.13723848332866562
0.2991294480100032	0.13714862254501492
0.2992328181411191	0.13705791658741442
0.29933676085692673	0.13696636270992552
0.2994412742104056	0.13687395817097794
0.29954635625944276	0.13678070023334077
0.29965200506687406	0.13668658616409401
0.2997582187005234	0.1365916132346
0.2998649952332413	0.13649577872047514
0.2999723327429416	0.1363990799015618
0.3000802293126374	0.13630151406190077
0.3001886830304753	0.13620307848970337
0.30029769198976874	0.13610377047732383
0.30040725428903015	0.1360035873212326
0.3005173680320016	0.1359025263219889
0.300628031327685	0.13580058478421383
0.3007392422903703	0.135697760016564
0.3008509990396633	0.13559404933170482
0.3009632997005121	0.1354894500462845
0.30107614240323255	0.13538395948090765
0.30118952528353277	0.1352775749601097
0.30130344648253615	0.13517029381233092
0.3014179041468044	0.13506211336989124
0.3015328964283587	0.13495303096896452
0.30164842148470017	0.1348430439495537
0.3017644774788295	0.1347321496554659
0.30188106257926595	0.1346203454342873
0.3019981749600647	0.13450762863735888
0.3021158128008343	0.13439399661975177
0.30223397428675247	0.13427944674024322
0.3023526576085814	0.13416397636129224
0.3024718609626823	0.13404758284901602
0.3025915825510292	0.133930263573166
0.3027118205812215	0.13381201590710448
0.30283257326649654	0.13369283722778105
0.3029538388257407	0.13357272491570962
0.3030756154835001	0.1334516763549451
0.3031979014699907	0.1333296889330608
0.3033206950211074	0.1332067600411256
0.3034439943784329	0.13308288707368138
0.30356779778924503	0.1329580674287207
0.30369210350652465	0.13283229850766465
0.3038169097889619	0.13270557771534058
0.3039422149009624	0.13257790245996048
0.3040680171126523	0.1324492701530991
0.30419431469988356	0.13231967820967228
0.30432110594423756	0.1321891240479157
0.3044483891330293	0.13205760508936365
0.3045761625593101	0.13192511875882773
0.3047044245218702	0.13179166248437593
0.3048331733252409	0.13165723369731205
0.3049624072796958	0.13152182983215477
0.30509212470125185	0.13138544832661725
0.30522232391167003	0.13124808662158682
0.3053530032384548	0.13110974216110466
0.3054841610148541	0.13097041239234586
0.3056157955798582	0.13083009476559943
0.30574790527819806	0.1306887867342486
0.30588048846034394	0.13054648575475092
0.3060135434825024	0.13040318928661931
0.3061470687066144	0.13025889479240205
0.30628106250035136	0.13011359973766404
0.30641552323711224	0.12996730159096762
0.30655044929601905	0.12981999782385362
0.30668583906191305	0.12967168591082234
0.3068216909253495	0.12952236332931538
0.30695800328259304	0.12937202755969668
0.30709477453561196	0.1292206760852342
0.30723200309207266	0.12906830639208183
0.3073696873653331	0.12891491596926122
0.3075078257744368	0.12876050230864358
0.30764641674410587	0.128605062904932
0.30778545870473384	0.12844859525564373
0.30792495009237814	0.12829109686109239
0.30806488934875265	0.12813256522437055
0.3082052749212194	0.1279729978513326
0.3083461052627807	0.12781239225057706
0.30848737883206995	0.1276507459334299
0.30862909409334316	0.1274880564139273
0.30877124951646995	0.1273243212087988
0.30891384357692364	0.12715953783745065
0.30905687475577215	0.12699370382194913
0.30920034153966786	0.12682681668700396
0.30934424242083747	0.126658873959952
0.30948857589707174	0.12648987317074098
0.30963334047171487	0.12631981185191324
0.30977853465365346	0.12614868753858985
0.309924156957306	0.1259764977684545
0.3100702059026112	0.12580324008173777
0.3102166800150166	0.12562891202120147
0.31036357782546703	0.12545351113212286
0.3105108978703929	0.12527703496227952
0.3106586386916978	0.12509948106193353
0.3108067988367468	0.1249208469838165
0.31095537685835356	0.12474113028311447
0.3111043713147682	0.12456032851745255
0.31125378076966437	0.12437843924688034
0.3114036037921263	0.12419546003385684
0.31155383895663596	0.12401138844323578
0.3117044848430598	0.12382622204225102
0.3118555400366352	0.12363995840050204
0.3120070031279575	0.12345259508993962
0.3121588727129656	0.12326412968485115
0.3123111473929291	0.12307455976184682
0.31246382577443366	0.12288388289984549
0.3126169064693672	0.12269209668006023
0.31277038809490615	0.12249919868598488
0.3129242692735006	0.12230518650338006
0.3130785486328604	0.12211005772025933
0.3132332248059403	0.12191380992687578
0.3133882964309256	0.12171644071570842
0.3135437621512174	0.12151794768144855
0.3136996206154177	0.12131832842098661
0.31385587047731484	0.12111758053339909
0.3140125103958679	0.12091570161993498
0.31416953903519235	0.12071268928400294
0.3143269550645442	0.1205085411311584
0.3144847571583054	0.12030325476909043
0.3146429439959679	0.12009682780760918
0.3148015142621188	0.11988925785863311
0.3149604666464243	0.11968054253617622
0.3151197998436149	0.11947067945633585
0.31527951255346887	0.11925966623727983
0.3154396034807974	0.11904750049923452
0.31560007133542844	0.11883417986447233
0.3157609148321908	0.11861970195729944
0.3159221326908985	0.11840406440404393
0.31608372363633513	0.11818726483304376
0.3162456863982371	0.1179693008746346
0.31640801971127824	0.11775017016113824
0.3165707223150538	0.1175298703268506
0.3167337929540638	0.11730839900803032
0.3168972303776975	0.1170857538428869
0.31706103334021674	0.11686193247156933
0.3172252006007399	0.11663693253615445
0.31738973092322575	0.11641075168063596
0.31755462307645693	0.11618338755091268
0.3177198758340239	0.11595483779477772
0.31788548797430827	0.1157251000619071
0.31805145828046666	0.11549417200384883
0.31821778554041424	0.11526205127401183
0.31838446854680824	0.11502873552765515
0.31855150609703153	0.11479422242187703
0.31871889699317635	0.11455850961560418
0.3188866400420273	0.11432159476958113
0.31905473405504564	0.1140834755463595
0.31922317784835197	0.1138441496102877
0.31939197024271027	0.11360361462750031
0.31956111006351107	0.11336186826590758
0.31973059614075516	0.1131189081951853
0.3199004273090367	0.11287473208676438
0.32007060240752694	0.11262933761382103
0.32024112027995766	0.11238272245126611
0.32041197977460445	0.11213488427573551
0.3205831797442703	0.11188582076557993
0.3207547190462689	0.11163552960085513
0.3209265965424082	0.11138400846331195
0.32109881109897387	0.11113125503638677
0.32127136158671266	0.1108772670051914
0.32144424688081585	0.11062204205650385
0.32161746586090284	0.1103655778787586
0.3217910174110046	0.1101078721620369
0.3219649004195469	0.10984892259805766
0.32213911377933424	0.10958872688016776
0.322313656387533	0.10932728270333307
0.32248852714565523	0.10906458776412876
0.3226637249595418	0.10880063976073036
0.32283924873934644	0.10853543639290478
0.32301509739951895	0.1082689753620008
0.323191269858789	0.10800125437094042
0.3233677650401494	0.10773227112420986
0.3235445818708403	0.10746202332785049
0.32372171928233223	0.10719050868945021
0.3238991762103101	0.10691772491813441
0.32407695159465694	0.10664366972455762
0.3242550443794374	0.10636834082089452
0.32443345351288155	0.10609173592083147
0.32461217794736874	0.10581385273955804
0.32479121663941135	0.10553468899375842
0.32497056854963857	0.10525424240160307
0.3251502326427801	0.10497251068274012
0.3253302078876504	0.10468949155828744
0.32551049325713216	0.10440518275082412
0.32569108772816063	0.10411958198438236
0.32587199028170727	0.10383268698443898
0.32605319990276393	0.10354449547790809
0.3262347155803267	0.10325500519313213
0.32641653630738005	0.10296421385987463
0.3265986610808811	0.1026721192093117
0.3267810889017435	0.10237871897402447
0.3269638187748217	0.10208401088799139
0.327146849708895	0.10178799268657993
0.32733018071665204	0.10149066210653936
0.3275138108146748	0.1011920168859927
0.327697739023423	0.10089205476442946
0.3278819643672186	0.10059077348269765
0.32806648587423	0.10028817078299646
0.32825130257645646	0.09998424440886898
0.3284364135097124	0.09967899210519422
0.32862181771361243	0.09937241161818032
0.32880751423155535	0.09906450069535679
0.32899350211070877	0.0987552570855674
0.329179780401994	0.09844467853896309
0.3293663481600707	0.09813276280699429
0.32955320444332115	0.09781950764240438
0.32974034831383536	0.09750491079922204
0.3299277788373959	0.09718897003275467
0.3301154950834624	0.096871683099581
0.3303034961251567	0.09655304775754431
0.3304917810392477	0.09623306176574556
0.33068034890613607	0.0959117228845364
0.3308691988098397	0.0955890288755123
0.3310583298379783	0.09526497750150596
0.33124774108175864	0.09493956652658041
0.3314374316359598	0.09461279371602231
0.3316274005989182	0.09428465683633541
0.33181764707251304	0.09395515365523381
0.33200817016215106	0.09362428194163551
0.3321989689767524	0.0932920394656558
0.3323900426287355	0.09295842399860069
0.33258139023400324	0.09262343331296075
0.33277301091192724	0.0922870651824043
0.33296490378533444	0.09194931738177156
0.33315706798049205	0.09161018768706784
0.33334950262709334	0.0912696738754575
0.33354220685824304	0.09092777372525764
0.3337351798104435	0.09058448501593201
0.33392842062357986	0.0902398055280848
0.33412192844090627	0.08989373304345438
0.33431570240903147	0.08954626534490738
0.3345097416779047	0.08919740021643253
0.3347040454008018	0.08884713544313487
0.33489861273431076	0.08849546881122948
0.3350934428383184	0.08814239810803574
0.33528853487599575	0.08778792112197138
0.3354838880137845	0.08743203564254662
0.3356795014213833	0.0870747394603585
0.3358753742717338	0.08671603036708489
0.3360715057410067	0.08635590615547864
0.33626789500858845	0.08599436461936236
0.33646454125706754	0.08563140355362228
0.3366614436722205	0.08526702075420278
0.33685860144299906	0.08490121401810079
0.337056013761516	0.08453398114336028
0.33725367982303206	0.08416531992906656
0.33745159882594244	0.08379522817534096
0.33764976997176355	0.08342370368333532
0.3378481924651197	0.0830507442552264
0.3380468655137296	0.08267634769421081
0.33824578832839347	0.08230051180449931
0.33844496012297987	0.08192323439131173
0.33864438011441245	0.08154451326087156
0.33884404752265695	0.0811643462204006
0.33904396157070826	0.08078273107811404
0.3392441214845775	0.08039966564321491
0.33944452649327905	0.08001514772588916
0.3396451758288177	0.07962917513730042
0.33984606872617584	0.07924174568958482
0.34004720442330066	0.07885285719584618
0.3402485821610918	0.07846250747015078
0.3404502011833881	0.07807069432752228
0.3406520607369556	0.07767741558393701
0.34085416007147457	0.07728266905631874
0.3410564984395271	0.07688645256253401
0.34125907509658493	0.07648876392138716
0.3414618893009966	0.07608960095261527
0.34166494031397543	0.07568896147688363
0.34186822739958694	0.07528684331578091
0.34207174982473687	0.07488324429181427
0.34227550685915903	0.07447816222840464
0.3424794977754027	0.0740715949498821
0.3426837218488208	0.07366354028148114
0.34288817835755797	0.073253996049336
0.3430928665825383	0.07284296008047608
0.3432977858074535	0.07243043020282151
0.343502935318751	0.07201640424517815
0.343708314405622	0.07160088003723356
0.34391392235998974	0.07118385540955209
0.3441197584764977	0.07076532819357068
0.34432582205249773	0.07034529622159434
0.3445321123880387	0.0699237573267915
0.3447386287858547	0.06950070934318996
0.34494537055135327	0.06907615010567217
0.34515233699260434	0.06865007744997127
0.3453595274203283	0.06822248921266647
0.34556694114788483	0.0677933832311788
0.34577457749126134	0.06736275734376691
0.34598243576906185	0.06693060938952286
0.3461905153024955	0.0664969372083678
0.34639881541536544	0.06606173864104772
0.34660733543405764	0.06562501152912974
0.3468160746875295	0.06518675371499726
0.3470250325072992	0.06474696304184634
0.3472342082274343	0.0643056373536815
0.34744360118454076	0.06386277449531158
0.34765321071775207	0.06341837231234577
0.34786303616871844	0.0629724286511896
0.34807307688159583	0.06252494135904085
0.34828333220303487	0.062075908283885636
0.3484938014821707	0.06162532727449459
0.3487044840706115	0.061173196180418665
0.3489153793224286	0.06071951285198547
0.34912648659414514	0.060264275140295226
0.3493378052447259	0.059807480897217186
0.34954933463556676	0.05934912797538541
0.34976107413048374	0.058889214228195236
0.34997302309570333	0.058427737509799516
0.3501851808998514	0.05796469567510461
0.35039754691394315	0.05750008657976685
0.35061012051137275	0.057033908080188794
0.35082290106790304	0.05656615803351549
0.35103588796165536	0.05609683429763085
0.3512490805730993	0.05562593473115385
0.3514624782850426	0.05515345719343512
0.3516760804826211	0.054679399544553114
0.3518898865532887	0.05420375964531085
0.352103895886807	0.05372653535723192
0.3523181078752362	0.05324772454255709
0.3525325219129241	0.052767325064241075
0.3527471373964971	0.05228533478594857
0.35296195372484984	0.05180175157205116
0.35317697029913575	0.051316573287623596
0.35339218652275695	0.050829797798440365
0.3536076018013551	0.05034142297097245
0.3538232155428012	0.04985144667238384
0.35403902715718616	0.04935986677052798
0.3542550360568114	0.04886668113394467
0.35447124165617916	0.04837188763185657
0.35468764337198294	0.04787548413416587
0.3549042406230982	0.047377468511451054
0.3551210328305731	0.04687783863496349
0.35533801941761867	0.04637659237662452
0.35555519980959993	0.045873727609021545
0.3557725734340265	0.04536924220540542
0.3559901397205434	0.04486313403968707
0.3562078981009215	0.04435540098643413
0.356425848009049	0.043846040920867885
0.3566439888809217	0.04333505171886014
0.3568623201546345	0.04282243125693003
0.357080841270372	0.04230817741224102
0.3572995516703994	0.04179228806259759
0.35751845079905387	0.04127476108644228
0.3577375381027357	0.04075559436285271
0.35795681302989896	0.0402347857715383
0.35817627503104327	0.03971233319283758
0.35839592355870453	0.039188234507714775
0.3586157580674463	0.03866248759775702
0.35883577801385147	0.03813509034517147
0.35905598285651286	0.03760604063278215
0.3592763720560253	0.03707533634402721
0.35949694507497665	0.036542975362955726
0.3597177013779394	0.03600895557422498
0.35993864043146195	0.03547327486309766
0.36015976170406044	0.03493593111543869
0.36038106466621017	0.034396922217712525
0.36060254879033704	0.033856246056980496
0.36082421355080957	0.03331390052089761
0.3610460584239301	0.032769883497709915
0.3612680828879272	0.03222419287625182
0.36149028642294645	0.03167682654594314
0.36171266851104306	0.031127782396786374
0.3619352286361735	0.030577058319363984
0.36215796628418706	0.03002465220483555
0.3623808809428183	0.02947056194493533
0.3626039721016782	0.028914785431969278
0.3628272392522471	0.02835732055881232
0.3630506818878658	0.027798165218906046
0.36327429950372847	0.0272373173062556
0.3634980915968739	0.02667477471542741
0.36372205766617827	0.026110535341546184
0.36394619721234694	0.02554459708029276
0.3641705097379069	0.024976957827901075
0.3643949947471987	0.024407615481155803
0.3646196517463692	0.02383656793738985
0.3648444802433632	0.023263813094481445
0.36506947974791637	0.022689348850852026
0.3652946497715473	0.0221131731054635
0.3655199898275502	0.02153528375781573
0.3657454994309868	0.020955678707944014
0.3659711780986794	0.020374355856416684
0.3661970253492032	0.019791313104332617
0.36642304070287884	0.019206548353318725
0.36664922368176467	0.018620059505527628
0.36687557380964997	0.018031844463634858
0.3671020906120471	0.017441901130837073
0.3673287736161843	0.016850227410848975
0.3675556223509987	0.016256821207901506
0.36778263634712854	0.015661680426739003
0.36800981513690645	0.015064802972617128
0.3682371582543521	0.01446618675130043
0.3684646652351648	0.013865829669059915
0.3686923356167167	0.01326372963267096
0.3689201689380458	0.012659884549410555
0.36914816473984824	0.012054292327055585
0.3693763225644722	0.011446950873880063
0.36960464195591036	0.010837858098653133
0.36983312245979283	0.010227011910636685
0.3700617636233805	0.009614410219583064
0.3702905649955583	0.009000050935732945
0.3705195261268279	0.008383931969813102
0.3707486465693013	0.00776605123303413
0.37097792587669354	0.007146406637088182
0.3712073636043166	0.006524996094146959
0.37143695930907217	0.005901817516859462
0.37166671254944494	0.005276868818349545
0.3718966228854963	0.004650147912214381
0.3721266898788574	0.004021652712521737
0.37235691309272245	0.003391381133808047
0.3725872920918426	0.0027593310910763724
0.37281782644251893	0.00212550049979425
0.37304851571259606	0.0014898872758914022
0.37327935947145585	0.0008524893357581276
0.3735103572900106	0.0002133045962425667
0.373741508740697	-0.00042766902535076867
0.3739728133974695	-0.001070433611263355
0.37420427083579394	-0.0017149912432845998
0.37443588063264116	-0.0023613440027540344
0.37466764236648104	-0.0030094939705630347
0.37489955561727567	-0.0036594432271569444
0.37513161996647376	-0.004311193852537518
0.37536383499700376	-0.004964747926263904
0.375596200293268	-0.005620107527455745
0.3758287154411366	-0.006277274734794308
0.376061380027941	-0.006936251626524961
0.3762941936424683	-0.007597040280458794
0.37652715587495483	-0.008259642773974687
0.3767602663170802	-0.008924061184021267
0.37699352456196134	-0.009590297587118657
0.3772269302041464	-0.010258354059360597
0.3774604828396088	-0.010928232676416183
0.3776941820657414	-0.011599935513531875
0.37792802748135046	-0.01227346464553325
0.3781620186866498	-0.012948822146826841
0.378396155283255	-0.013626010091402116
0.3786304368741773	-0.014305030552833234
0.37886486306381817	-0.014985885604281005
0.37909943345796343	-0.01566857731849447
0.37933414766377727	-0.016353107767813027
0.37956900528979676	-0.017039479024167928
0.379804005945926	-0.017727693159084304
0.38003914924343063	-0.01841775224368271
0.38027443479493195	-0.019109658348681197
0.38050986221440153	-0.019803413544397047
0.38074543111715553	-0.020499019900748067
0.38098114111984893	-0.021196479487255088
0.3812169918404704	-0.021895794373042995
0.38145298289833635	-0.022596966626842976
0.3816891139140858	-0.023299998316993864
0.38192538450967445	-0.024004891511444096
0.38216179430837005	-0.02471164827775338
0.38239834293474606	-0.025420270683094257
0.38263503001467675	-0.026130760794253957
0.3828718551753319	-0.026843120677635918
0.38310881804517105	-0.027557352399261534
0.38334591825393877	-0.02827345802477199
0.3835831554326588	-0.028991439619429446
0.3838205292136292	-0.02971129924811912
0.38405803923041665	-0.030433038975350782
0.38429568511785184	-0.031156660865260394
0.3845334665120238	-0.03188216698161138
0.3847713830502748	-0.032609559387797096
0.38500943437119545	-0.03333884014684138
0.3852476201146192	-0.034070011321400875
0.3854859399216176	-0.03480307497376636
0.3857243934344951	-0.03553803316586435
0.38596298029678366	-0.036274887959258595
0.38620170015323835	-0.03701364141515186
0.3864405526498319	-0.0377542955943871
0.3866795374337497	-0.03849685255744929
0.3869186541533852	-0.039241314364466984
0.3871579024583346	-0.03998768307521368
0.38739728199939205	-0.04073596074910946
0.3876367924285448	-0.041486149445222276
0.3878764333989684	-0.042238251222269846
0.3881162045650215	-0.04299226813862066
0.3883561055822417	-0.04374820225229628
0.38859613610733995	-0.044506055620971444
0.38883629579819623	-0.04526583030197724
0.38907658431385483	-0.046027528352300826
0.3893170013145194	-0.0467911518285887
0.38955754646154833	-0.04755670278714637
0.3897982194174501	-0.04832418328394139
0.3900390198458783	-0.049093595374603116
0.3902799474116277	-0.04986494111442617
0.3905210017806287	-0.05063822255837004
0.39076218261994333	-0.051413441761061024
0.3910034895977606	-0.05219060077679469
0.3912449223833918	-0.05296970165953538
0.39148648064726577	-0.05375074646291954
0.39172816406092487	-0.05453373724025551
0.3919699722970201	-0.05531867604452616
0.3922119050293065	-0.05610556492838907
0.3924539619326394	-0.0568944059441792
0.3926961426829689	-0.05768520114390875
0.3929384469573365	-0.058477952579270256
0.39318087443386984	-0.05927266230163608
0.39342342479177894	-0.06006933236206151
0.3936660977113515	-0.06086796481128448
0.39390889287394876	-0.06166856169972841
0.3941518099620009	-0.06247112507750183
0.39439484865900304	-0.0632756569944018
0.39463800864951054	-0.06408215949991294
0.39488128961913554	-0.06489063464321078
0.39512469125454175	-0.06570108447316125
0.39536821324344074	-0.06651351103832358
0.39561185527458786	-0.06732791638695008
0.3958556170377776	-0.06814430256698917
0.39609949822383983	-0.06896267162608423
0.39634349852463546	-0.0697830256115775
0.3965876176330524	-0.07060536657050968
0.39683185524300124	-0.07142969654962121
0.3970762110494116	-0.07225601759535447
0.39732068474822724	-0.07308433175385387
0.39756527603640324	-0.07391464107096825
0.3978099846119007	-0.07474694759225087
0.39805481017368344	-0.07558125336296181
0.398299752421714	-0.07641756042806791
0.39854481105694917	-0.0772558708322457
0.39878998578133673	-0.0780961866198804
0.3990352762978107	-0.07893850983506938
0.39928068231028835	-0.07978284252162123
0.39952620352366525	-0.08062918672305905
0.39977183964381213	-0.08147754448261955
0.40001759037757106	-0.08232791784325576
0.40026345543275077	-0.08318030884763754
0.4005094345181237	-0.08403471953815278
0.40075552734342174	-0.0848911519569086
0.40100173361933256	-0.0857496081457327
0.4012480530574956	-0.08661009014617399
0.40149448537049875	-0.08747259999950437
0.4017410302718741	-0.08833713974671907
0.4019876874760945	-0.08920371142853886
0.40223445669856955	-0.09007231708541
0.4024813376556425	-0.09094295875750628
0.40272833006458586	-0.09181563848472926
0.4029754336435983	-0.09269035830671052
0.4032226481118004	-0.0935671202628114
0.4034699731892315	-0.09444592639212557
0.40371740859684613	-0.09532677873347822
0.4039649540565099	-0.09620967932542951
0.4042126092909963	-0.09709463020627329
0.4044603740239832	-0.09798163341404016
0.40470824798004884	-0.09887069098649678
0.4049562308846689	-0.09976180496114855
0.40520432246421245	-0.1006549773752394
0.40545252244593877	-0.10155021026575375
0.40570083055799355	-0.10244750566941643
0.40594924652940595	-0.10334686562269561
0.4061977700900844	-0.10424829216180134
0.4064464009708138	-0.10515178732268894
0.40669513890325176	-0.10605735314105831
0.4069439836199253	-0.10696499165235597
0.4071929348542273	-0.10787470489177564
0.4074419923404134	-0.10878649489425947
0.4076911558135982	-0.10970036369449848
0.40794042500975247	-0.11061631332693465
0.4081897996656993	-0.11153434582576051
0.40843927951911096	-0.11245446322492171
0.4086888643085059	-0.11337666755811633
0.40893855377324473	-0.11430096085879729
0.40918834765352763	-0.11522734516017251
0.4094382456903909	-0.11615582249520637
0.40968824762570333	-0.11708639489661975
0.40993835320216376	-0.11801906439689258
0.4101885621632968	-0.11895383302826307
0.4104388742534506	-0.1198907028227302
0.4106892892177932	-0.12082967581205312
0.4109398068023093	-0.12177075402775382
0.41119042675379713	-0.12271393950111627
0.4114411488198656	-0.12365923426318905
0.4116919727489307	-0.12460664034478477
0.41194289829021274	-0.1255561597764825
0.412193925193733	-0.12650779458862688
0.4124450532103109	-0.1274615468113314
0.4126962820915606	-0.1284174184744764
0.4129476115898883	-0.12937541160771304
0.4131990414584886	-0.13033552824046146
0.41345057145134245	-0.13129777040191393
0.4137022013232128	-0.13226214012103416
0.4139539308296428	-0.13322863942655905
0.41420575972695206	-0.13419727034699896
0.41445768777223413	-0.1351680349106397
0.41470971472335305	-0.1361409351455416
0.4149618403389409	-0.13711597307954243
0.4152140643783941	-0.13809315074025655
0.4154663866018717	-0.13907247015507718
0.41571880677029094	-0.1400539333511757
0.4159713246453258	-0.14103754235550442
0.416223939989403	-0.1420232991947956
0.41647665256569966	-0.14301120589556365
0.41672946213814044	-0.14400126448410502
0.41698236847139436	-0.1449934769865
0.41723537133087224	-0.1459878454286123
0.4174884704827239	-0.14698437183609142
0.41774166569383503	-0.1479830582343718
0.4179949567318247	-0.14898390664867572
0.41824834336504224	-0.14998691910401127
0.41850182536256514	-0.15099209762517668
0.41875540249419496	-0.15199944423675765
0.41900907453045644	-0.15300896096313094
0.4192628412425928	-0.15402064982846334
0.4195167024025645	-0.15503451285671355
0.41977065778304556	-0.15605055207163226
0.42002470715742174	-0.15706876949676396
0.4202788502997867	-0.15808916715544588
0.42053308698494046	-0.15911174707081138
0.4207874169883858	-0.16013651126578815
0.4210418400863265	-0.16116346176310087
0.4212963560556636	-0.16219260058527057
0.42155096467399394	-0.1632239297546173
0.42180566571960654	-0.1642574512932583
0.4220604589714805	-0.16529316722311133
0.4223153442092824	-0.16633107956589327
0.4225703212133634	-0.1673711903431231
0.4228253897647571	-0.16841350157612023
0.4230805496451764	-0.16945801528600754
0.4233358006370114	-0.17050473349371015
0.42359114252332686	-0.1715536582199579
0.42384657508785917	-0.17260479148528457
0.4241020981150146	-0.17365813531003005
0.42435771138986583	-0.17471369171433956
0.4246134146981505	-0.1757714627181661
0.42486920782626764	-0.17683145034126918
0.42512509056127623	-0.177893656603218
0.4253810626908917	-0.17895808352338935
0.42563712400348447	-0.180024733120971
0.4258932742880766	-0.1810936074149603
0.4261495133343402	-0.18216470842416654
0.42640584093259404	-0.18323803816721013
0.42666225687380216	-0.18431359866252517
0.4269187609495706	-0.1853913919283578
0.4271753529521454	-0.1864714199827695
0.42743203267441043	-0.18755368484363522
0.42768879990988445	-0.1886381885286464
0.42794565445271915	-0.18972493305530985
0.4282025960976968	-0.19081392044094955
0.42845962464022747	-0.1919051527027068
0.4287167398763473	-0.19299863185754113
0.42897394160271585	-0.19409435992223117
0.4292312296166137	-0.19519233891337456
0.4294886037159403	-0.19629257084738966
0.42974606369921164	-0.19739505774051508
0.4300036093655579	-0.19849980160881175
0.43026124051472137	-0.1996068044681621
0.43051895694705394	-0.2007160683342718
0.4307767584635148	-0.20182759522266985
0.43103464486566856	-0.20294138714870977
0.43129261595568263	-0.2040574461275692
0.4315506715363253	-0.20517577417425237
0.43180881141096317	-0.20629637330358824
0.4320670353835593	-0.20741924553023394
0.4323253432586706	-0.20854439286867288
0.43258373484144624	-0.20967181733321735
0.4328422099376248	-0.21080152093800747
0.4331007683535326	-0.21193350569701377
0.4333594098960811	-0.21306777362403556
0.43361813437276553	-0.21420432673270373
0.4338769415916614	-0.21534316703647954
0.4341358313614238	-0.21648429654865686
0.43439480349128434	-0.21762771728236113
0.43465385779104965	-0.21877343125055165
0.4349129940710985	-0.21992144046602086
0.43517221214238055	-0.22107174694139564
0.4354315118164138	-0.22222435268913776
0.4356908929052823	-0.22337925972154463
0.4359503552216346	-0.22453647005074934
0.43620989857868153	-0.22569598568872212
0.43646952279019374	-0.22685780864727012
0.4367292276705004	-0.2280219409380388
0.4369890130344861	-0.22918838457251164
0.4372488786975901	-0.2303571415620116
0.4375088244758034	-0.23152821391770054
0.43776885018566697	-0.23270160365058182
0.4380289556442696	-0.23387731277149826
0.4382891406692464	-0.23505534329113525
0.43854940507877627	-0.23623569722001905
0.4388097486915804	-0.23741837656851944
0.43907017132691956	-0.23860338334684844
0.4393306728045931	-0.2397907195650628
0.43959125294493623	-0.2409803872330623
0.4398519115688185	-0.2421723883605928
0.44011264849764153	-0.24336672495724432
0.44037346355333756	-0.2445633990324538
0.440634356558367	-0.24576241259550388
0.440895327335717	-0.24696376765552513
0.44115637570889893	-0.2481674662214946
0.44141750150194736	-0.24937351030223875
0.44167870453941716	-0.2505819019064316
0.4419399846463826	-0.25179264304259724
0.4422013416484346	-0.25300573571910884
0.4424627753716797	-0.2542211819441907
0.44272428564273736	-0.2554389837259171
0.44298587228873887	-0.25665914307221466
0.44324753513732484	-0.2578816619908608
0.44350927401664414	-0.25910654248948667
0.44377108875535115	-0.260333786575575
0.44403297918260476	-0.26156339625646363
0.44429494512806617	-0.26279537353934274
0.4445569864218969	-0.26402972043125866
0.4448191028947577	-0.2652664389391115
0.4450812943778057	-0.266505531069658
0.4453435607026938	-0.26774699882951025
0.44560590170156805	-0.2689908442251372
0.44586831720706604	-0.270237069262865
0.44613080705231556	-0.27148567594887774
0.44639337107093224	-0.2727366662892168
0.4466560090970185	-0.2739900422897832
0.44691872096516094	-0.2752458059563363
0.44718150651042965	-0.27650395929449584
0.44744436556837536	-0.2777645043097409
0.44770729797502895	-0.27902744300741217
0.4479703035668985	-0.2802927773927103
0.44823338218096853	-0.2815605094706989
0.4484965336546979	-0.28283064124630247
0.4487597578260181	-0.2841031747243091
0.4490230545333318	-0.285378111909369
0.449286423615511	-0.28665545480599725
0.44954986491189525	-0.2879352054185715
0.44981337826229034	-0.28921736575133505
0.4500769635069664	-0.2905019378083956
0.4503406204866562	-0.2917889235937269
0.4506043490425538	-0.2930783251111676
0.45086814901631256	-0.2943701443644243
0.45113202025004373	-0.2956643833570691
0.45139596258631504	-0.2969610440925426
0.4516599758681483	-0.2982601285741519
0.4519240599390191	-0.2995616388050739
0.4521882146428537	-0.30086557678835296
0.4524524398240287	-0.3021719445269036
0.45271673532736867	-0.3034807440235092
0.45298110099814504	-0.3047919772808243
0.4532455366820741	-0.3061056463013726
0.4535100422253161	-0.3074217530875504
0.45377461747447273	-0.3087402996416239
0.45403926227658636	-0.3100612879657327
0.45430397647913834	-0.31138472006188733
0.45456875993004714	-0.31271059793197287
0.4548336124776672	-0.31403892357774565
0.4550985339707871	-0.3153696990008376
0.45536352425862825	-0.31670292620275325
0.4556285831908434	-0.31803860718487276
0.4558937106175146	-0.3193767439484503
0.4561589063891528	-0.32071733849461687
0.456424170356695	-0.3220603928243777
0.4566895023715041	-0.3234059089386159
0.45695490228536606	-0.3247538888380898
0.45722036995048976	-0.3261043345234362
0.45748590521950444	-0.32745724799516845
0.45775150794545894	-0.32881263125367893
0.4580171779818198	-0.33017048629923695
0.4582829151824702	-0.33153081513199245
0.458548719401708	-0.33289361975197296
0.45881459049424494	-0.33425890215908716
0.45908052831520463	-0.3356266643531224
0.4593465327201214	-0.3369969083337475
0.4596126035649389	-0.3383696361005117
0.4598787407060084	-0.3397448496528463
0.460144944000088	-0.3411225509900628
0.4604112133043402	-0.3425027421113568
0.4606775484763318	-0.3438854250158043
0.46094394937403127	-0.34527060170236623
0.46121041585580796	-0.3466582741698854
0.461476947780431	-0.3480484444170892
0.4617435450070673	-0.34944111444258813
0.4620102073952805	-0.3508362862448784
0.4622769348050295	-0.352233961822341
0.4625437270966673	-0.35363414317324093
0.4628105841309394	-0.35503683229573046
0.46307750576898254	-0.3564420311878465
0.4633444918723233	-0.3578497418475143
0.46361154230287693	-0.3592599662725438
0.4638786569229459	-0.36067270646063376
0.46414583559521844	-0.36208796440936963
0.4644130781827676	-0.36350574211622566
0.4646803845490493	-0.3649260415785633
0.4649477545579018	-0.36634886479363454
0.46521518807354356	-0.36777421375857844
0.4654826849605729	-0.36920209047042535
0.46575024508396556	-0.370632496926094
0.46601786830907455	-0.37206543512239504
0.4662855545016278	-0.37350090705602773
0.46655330352772806	-0.3749389147235843
0.4668211152538503	-0.3763794601215465
0.4670889895468414	-0.3778225452462897
0.46735692627391867	-0.3792681720940795
0.4676249253026684	-0.3807163426610754
0.4678929865010447	-0.38216705894332853
0.46816110973736824	-0.3836203229367844
0.46842929488032503	-0.3850761366372807
0.46869754179896517	-0.3865345020405505
0.4689658503627016	-0.38799542114221963
0.4692342204413089	-0.3894588959378097
0.469502651904922	-0.3909249284227363
0.4697711446240351	-0.3923935205923112
0.4700396984695	-0.39386467444174084
0.47030831331252576	-0.39533839196612913
0.4705769890246766	-0.3968146751604741
0.4708457254778712	-0.39829352601967266
0.47111452254438113	-0.39977494653851753
0.47138338009683034	-0.40125893871169926
0.4716522980081931	-0.4027455045338055
0.47192127615179347	-0.4042346459993231
0.4721903144013038	-0.4057263651026357
0.4724594126307437	-0.4072206638380273
0.4727285707144787	-0.4087175441996797
0.47299778852721935	-0.41021700818167534
0.4732670659440198	-0.4117190577779945
0.4735364028402767	-0.4132236949825199
0.4738057990917284	-0.4147309217890326
0.4740752545744531	-0.4162407401912157
0.47434476916486823	-0.4177531521826523
0.47461434273972947	-0.419268159756828
0.4748839751761289	-0.42078576490712916
0.4751536663514948	-0.4223059696268449
0.47542341614358946	-0.4238287759091658
0.47569322443050915	-0.42535418574718614
0.4759630910906821	-0.4268822011339023
0.47623301600286805	-0.4284128240622146
0.47650299904615667	-0.4299460565249263
0.47677304009996696	-0.4314819005147458
0.47704313904404533	-0.4330203580242839
0.4773132957584656	-0.4345614310460581
0.47758351012362676	-0.43610512157248893
0.477853782020253	-0.4376514315959037
0.4781241113293918	-0.4392003631085335
0.47839449793241307	-0.4407519181025169
0.4786649417110084	-0.44230609856989744
0.4789354425471894	-0.44386290650262583
0.47920600032328725	-0.4454223438925588
0.4794766149219513	-0.44698441273146083
0.47974728622614793	-0.4485491150110029
0.48001801411915995	-0.4501164527227649
0.48028879848458483	-0.4516864278582331
0.48055963920633443	-0.4532590424088035
0.4808305361686334	-0.45483429836577904
0.4811014892560184	-0.45641219772037356
0.48137249835333706	-0.4579927424637078
0.4816435633457469	-0.4595759345868137
0.48191468411871397	-0.4611617760806315
0.4821858605580129	-0.462750268936013
0.48245709254972446	-0.46434141514371846
0.4827283799802356	-0.46593521669442084
0.48299972273623787	-0.4675316755787018
0.48327112070472694	-0.4691307937870561
0.483542573773001	-0.47073257330988827
0.48381408182866015	-0.4723370161375163
0.4840856447596053	-0.4739441242601683
0.4843572624540373	-0.4755538996679867
0.4846289348004557	-0.4771663443510246
0.484900661687658	-0.4787814602992496
0.48517244300473844	-0.4803992495025409
0.4854442786410876	-0.48201971395069304
0.4857161684863903	-0.4836428556334122
0.48598811243062606	-0.48526867654032046
0.4862601103640669	-0.48689717866095206
0.48653216217727735	-0.4885283639847582
0.4868042677611125	-0.49016223450110274
0.48707642700671816	-0.491798792199266
0.4873486398055289	-0.49343803906844275
0.4876209060492677	-0.4950799770977445
0.48789322562994497	-0.496724608276197
0.4881655984398575	-0.49837193459274404
0.48843802437158723	-0.5000219580362442
0.48871050331800103	-0.501674680595474
0.4889830351722491	-0.503330104259126
0.48925561982776444	-0.504988231015811
0.48952825717826165	-0.5066490628540559
0.48980094711773636	-0.5083126017623066
0.490073689540464	-0.5099788497289264
0.4903464843409991	-0.5116478087421972
0.49061933141417413	-0.5133194807903185
0.4908922306550991	-0.5149938678614103
0.49116518195916	-0.5166709719435099
0.4914381852220184	-0.5183507950245756
0.49171124033961033	-0.5200333390924831
0.4919843472081457	-0.5217186061350301
0.49225750572410665	-0.5234065981399328
0.49253071578424784	-0.5250973170948291
0.49280397728559444	-0.5267907649872758
0.4930772901254419	-0.5284869438047523
0.49335065420135493	-0.5301858555346571
0.49362406941116677	-0.5318875021643124
0.49389753565297784	-0.5335918856809594
0.4941710528251555	-0.5352990080717636
0.4944446208263329	-0.5370088713238101
0.49471823955540806	-0.5387214774241085
0.49499190891154277	-0.5404368283595896
0.4952656287941628	-0.5421549261171077
0.49553939910295564	-0.5438757726834393
0.4958132197378708	-0.5455993700452854
0.4960870905991181	-0.5473257201892688
0.4963610115871676	-0.5490548251019376
0.49663498260274824	-0.5507866867697641
0.49690900354684725	-0.5525213071791428
0.4971830743207092	-0.5542586883163949
0.49745719482583517	-0.5559988321677646
0.4977313649639823	-0.5577417407194225
0.4980055846371621	-0.5594874159574628
0.49827985374764094	-0.561235859867907
0.49855417219793774	-0.5629870744367005
0.4988285398908246	-0.5647410616497155
0.49910295672932486	-0.5664978234927495
0.499377422616713	-0.568257361951528
0.49965193745651343	-0.5700196790117008
0.49992650115250004	-0.5717847766588464
0.5002011136086951	-0.5735526568784693
0.5004757747293688	-0.5753233216560015
0.5007504844190378	-0.5770967729768021
0.5010252425824655	-0.5788730128261588
0.5013000491246603	-0.580652043189286
0.5015749039508752	-0.5824338660513275
0.5018498069666074	-0.5842184833973545
0.5021247580775967	-0.5860058972123671
0.5023997571898252	-0.5877961094812939
0.5026748042095169	-0.5895891221889936
0.5029498990431363	-0.5913849373202525
0.5032250415973877	-0.593183556859788
0.5035002317792148	-0.5949849827922455
0.5037754694958001	-0.596789217102202
0.5040507546545632	-0.5985962617741633
0.5043260871631612	-0.600406118792566
0.504601466929487	-0.602218790141777
0.5048768938616695	-0.6040342778060949
0.5051523678680718	-0.6058525837697479
0.5054278888572915	-0.6076737100168961
0.505703456738159	-0.6094976585316307
0.5059790714197376	-0.6113244312979751
0.5062547328113222	-0.6131540302998835
0.5065304408224387	-0.6149864575212433
0.5068061953628438	-0.6168217149458726
0.5070819963425233	-0.6186598045575238
0.5073578436716922	-0.6205007283398793
0.5076337372607937	-0.6223444882765583
0.5079096770204984	-0.6241910863511085
0.5081856628617036	-0.6260405245470145
0.5084616946955329	-0.6278928048476919
0.5087377724333351	-0.6297479292364917
0.5090138959866835	-0.6316058996966971
0.5092900652673755	-0.633466718211527
0.509566280187432	-0.635330386764133
0.5098425406590961	-0.6371969073376028
0.5101188465948329	-0.6390662819149571
0.5103951979073286	-0.6409385124791525
0.51067159450949	-0.6428136010130804
0.5109480363144435	-0.6446915494995673
0.511224523235535	-0.6465723599213752
0.5115010551863286	-0.648456034261202
0.511777632080606	-0.6503425745016804
0.5120542538323661	-0.6522319826253807
0.5123309203558244	-0.6541242606148083
0.5126076315654119	-0.6560194104524054
0.5128843873757748	-0.6579174341205504
0.5131611877017737	-0.6598183336015592
0.5134380324584826	-0.6617221108776838
0.5137149215611894	-0.6636287679311146
0.5139918549253933	-0.6655383067439774
0.5142688324668064	-0.6674507292983377
0.514545854101351	-0.6693660375761972
0.5148229197451606	-0.6712842335594967
0.5151000293145778	-0.6732053192301137
0.5153771827261548	-0.6751292965698652
0.5156543798966524	-0.677056167560506
0.5159316207430389	-0.6789859341837302
0.5162089051824902	-0.6809185984211696
0.5164862331323886	-0.6828541622543969
0.5167636045103224	-0.6847926276649213
0.5170410192340853	-0.6867339966341944
0.5173184772216757	-0.6886782711436048
0.5175959783912958	-0.6906254531744831
0.5178735226613518	-0.6925755447080976
0.5181511099504521	-0.6945285477256586
0.5184287401774078	-0.6964844642083149
0.5187064132612315	-0.6984432961371577
0.5189841291211363	-0.7004050454932172
0.5192618876765364	-0.7023697142574659
0.5195396888470452	-0.7043373044108155
0.5198175325524753	-0.7063078179341209
0.520095418712838	-0.708281256808176
0.5203733472483427	-0.7102576230137191
0.5206513180793955	-0.7122369185314266
0.5209293311265997	-0.7142191453419208
0.5212073863107545	-0.7162043054257621
0.5214854835528548	-0.7181924007634566
0.5217636227740904	-0.7201834333354499
0.5220418038958452	-0.7221774051221324
0.522320026839697	-0.7241743181038354
0.5225982915274168	-0.7261741742608344
0.522876597880968	-0.7281769755733472
0.5231549458225062	-0.7301827240215351
0.5234333352743783	-0.7321914215855025
0.523711766159122	-0.7342030702452985
0.5239902383994651	-0.7362176719809139
0.5242687519183253	-0.7382352287722849
0.5245473066388093	-0.7402557425992916
0.5248259024842123	-0.742279215441758
0.5251045393780174	-0.7443056492794519
0.5253832172438954	-0.7463350460920875
0.5256619360057031	-0.7483674078593211
0.5259406955874847	-0.7504027365607562
0.5262194959134692	-0.7524410341759397
0.526498336908071	-0.7544823026843649
0.5267772184958891	-0.7565265440654689
0.5270561406017067	-0.7585737602986371
0.5273351031504901	-0.7606239533631969
0.5276141060673887	-0.7626771252384248
0.5278931492777342	-0.7647332779035405
0.5281722327070403	-0.7667924133377124
0.5284513562810016	-0.7688545335200528
0.5287305199254939	-0.7709196404296228
0.5290097235665727	-0.7729877360454283
0.5292889671304735	-0.775058822346423
0.5295682505436107	-0.777132901311506
0.5298475737325774	-0.7792099749195261
0.5301269366241445	-0.7812900451492768
0.5304063391452608	-0.7833731139795006
0.5306857812230515	-0.7854591833888864
0.530965262784819	-0.7875482553560716
0.5312447837580409	-0.789640331859641
0.5315243440703705	-0.7917354148781275
0.5318039436496359	-0.7938335063900116
0.5320835824238397	-0.7959346083737238
0.5323632603211581	-0.7980387228076412
0.5326429772699407	-0.8001458516700897
0.53292273319871	-0.8022559969393455
0.5332025280361606	-0.8043691605936312
0.5334823617111589	-0.8064853446111208
0.5337622341527427	-0.8086045509699356
0.5340421452901203	-0.8107267816481479
0.5343220950526704	-0.8128520386237779
0.5346020833699415	-0.8149803238747967
0.5348821101716511	-0.8171116393791239
0.5351621753876857	-0.8192459871146307
0.5354422789480998	-0.8213833690591357
0.5357224207831157	-0.8235237871904109
0.536002600823123	-0.8256672434861759
0.5362828189986779	-0.8278137399241029
0.5365630752405032	-0.8299632784818125
0.5368433694794869	-0.8321158611368784
0.5371237016466827	-0.8342714898668229
0.5374040716733088	-0.8364301666491217
0.537684479490748	-0.8385918934611994
0.5379649250305467	-0.8407566722804336
0.5382454082244146	-0.842924505084152
0.5385259290042245	-0.8450953938496356
0.538806487302011	-0.8472693405541151
0.5390870830499712	-0.8494463471747749
0.5393677161804634	-0.85162641568875
0.5396483866260069	-0.8538095480731286
0.539929094319281	-0.8559957463049499
0.5402098391931258	-0.8581850123612075
0.5404906211805404	-0.8603773482188452
0.5407714402146828	-0.8625727558547613
0.54105229622887	-0.8647712372458054
0.541333189156577	-0.8669727943687824
0.5416141189314365	-0.8691774292004468
0.5418950854872382	-0.8713851437175102
0.5421760887579288	-0.8735959398966338
0.542457128677611	-0.8758098197144357
0.5427382051805436	-0.8780267851474851
0.5430193182011408	-0.8802468381723062
0.5433004676739713	-0.8824699807653762
0.5435816535337589	-0.8846962149031273
0.5438628757153806	-0.8869255425619448
0.5441441341538681	-0.8891579657181696
0.5444254287844049	-0.8913934863480949
0.5447067595423284	-0.8936321064279713
0.5449881263631272	-0.8958738279340009
0.5452695291824426	-0.8981186528423433
0.5455509679360665	-0.900366583129111
0.5458324425599423	-0.9026176207703724
0.5461139529901634	-0.9048717677421511
0.5463954991629735	-0.9071290260204266
0.5466770810147659	-0.9093893975811318
0.5469586984820829	-0.911652884400157
0.5472403515016157	-0.9139194884533471
0.5475220400102038	-0.9161892117165038
0.5478037639448343	-0.9184620561653835
0.5480855232426425	-0.9207380237756998
0.5483673178409096	-0.923017116523121
0.5486491476770644	-0.9252993363832736
0.5489310126886813	-0.9275846853317383
0.5492129128134805	-0.9298731653440545
0.5494948479893279	-0.9321647783957158
0.549776818154234	-0.9344595264621756
0.5500588232463538	-0.9367574115188406
0.5503408632039866	-0.9390584355410779
0.550622937965575	-0.9413626005042092
0.5509050474697053	-0.943669908383515
0.5511871916551061	-0.9459803611542319
0.5514693704606493	-0.9482939607915553
0.5517515838253476	-0.9506107092706366
0.5520338316883564	-0.9529306085665873
0.5523161139889718	-0.9552536606544734
0.5525984306666308	-0.9575798675093224
0.5528807816609108	-0.9599092311061163
0.5531631669115291	-0.9622417534197988
0.5534455863583427	-0.9645774364252684
0.553728039941348	-0.9669162820973853
0.5540105276006798	-0.9692582924109657
0.5542930492766114	-0.9716034693407863
0.5545756049095544	-0.9739518148615807
0.5548581944400578	-0.9763033309480428
0.5551408178088078	-0.9786580195748243
0.5554234749566272	-0.981015882716538
0.555706165824476	-0.983376922347753
0.5559888903534493	-0.985741140443001
0.5562716484847788	-0.9881085389767688
0.5565544401598308	-0.990479119923508
0.5568372653201064	-0.9928528852576254
0.5571201239072419	-0.99522983695349
0.5574030158630071	-0.9976099769854294
0.557685941129306	-0.9999933073277327
0.5579688996481755	-1.002379829954647
0.5582518913617861	-1.0047695468403814
0.5585349162124401	-1.0071624599591038
0.558817974142573	-1.0095585712849449
0.5591010650947512	-1.0119578827919926
0.5593841890116733	-1.0143603964542982
0.5596673458361687	-1.0167661142458717
0.5599505355111978	-1.0191750381406863
0.5602337579798509	-1.0215871701126726
0.5605170131853486	-1.0240025121357272
0.5608003010710414	-1.0264210661837025
0.5610836215804086	-1.0288428342304168
0.5613669746570588	-1.0312678182496462
0.5616503602447287	-1.0336960202151304
0.5619337782872839	-1.0361274421005693
0.5622172287287168	-1.0385620858796267
0.5625007115131484	-1.0409999535259256
0.562784226584826	-1.0434410470130522
0.5630677738881239	-1.0458853683145541
0.5633513533675429	-1.048332919403943
0.5636349649677097	-1.0507837022546889
0.5639186086333767	-1.0532377188402284
0.5642022843094218	-1.0556949711339567
0.5644859919408475	-1.0581554611092354
0.5647697314727813	-1.0606191907393847
0.565053502850475	-1.0630861619976908
0.5653373060193039	-1.0655563768574
0.5656211409247673	-1.0680298372917236
0.5659050075124877	-1.0705065452738354
0.5661889057282105	-1.0729865027768715
0.5664728355178031	-1.0754697117739314
0.5667567968272562	-1.0779561742380797
0.5670407896026811	-1.0804458921423414
0.567324813790312	-1.0829388674597078
0.5676088693365028	-1.0854351021631314
0.5678929561877296	-1.0879345982255308
0.5681770742905882	-1.090437357619786
0.5684612235917949	-1.0929433823187424
0.5687454040381856	-1.0954526742952098
0.5690296155767163	-1.0979652355219598
0.5693138581544612	-1.1004810679717316
0.5695981317186143	-1.1030001736172252
0.5698824362164877	-1.1055225544311074
0.5701667715955117	-1.1080482123860085
0.5704511378032345	-1.1105771494545236
0.5707355347873215	-1.1131093676092112
0.5710199624955563	-1.115644868822598
0.5713044208758381	-1.1181836550671704
0.5715889098761837	-1.1207257283153853
0.5718734294447254	-1.1232710905396601
0.5721579795297123	-1.12581974371238
0.5724425600795078	-1.128371689805894
0.5727271710425921	-1.1309269307925178
0.5730118123675589	-1.1334854686445304
0.5732964840031178	-1.136047305334179
0.5735811858980921	-1.138612442833674
0.5738659180014188	-1.1411808831151933
0.5741506802621494	-1.1437526281508783
0.5744354726294482	-1.1463276799128392
0.5747202950525926	-1.1489060403731497
0.5750051474809731	-1.1514877115038515
0.5752900298640924	-1.1540726952769496
0.5755749421515655	-1.1566609936644188
0.5758598842931191	-1.1592526086381971
0.5761448562385914	-1.1618475421701917
0.5764298579379319	-1.1644457962322732
0.5767148893412012	-1.1670473727962816
0.57699995039857	-1.1696522738340214
0.57728504106032	-1.1722605013172662
0.5775701612768422	-1.174872057217753
0.5778553109986381	-1.1774869435071902
0.5781404901763177	-1.1801051621572483
0.5784256987606008	-1.1827267151395695
0.5787109367023159	-1.1853516044257597
0.5789962039523997	-1.1879798319873947
0.5792815004618974	-1.1906113997960146
0.579566826181962	-1.1932463098231305
0.5798521810638543	-1.1958845640402178
0.5801375650589421	-1.1985261644187233
0.5804229781187006	-1.2011711129300562
0.5807084201947116	-1.203819411545599
0.5809938912386633	-1.2064710622366979
0.5812793912023502	-1.2091260669746697
0.5815649200376724	-1.2117844277307974
0.5818504776966362	-1.2144461464763343
0.5821360641313524	-1.2171112251824987
0.5824216792940375	-1.2197796658204816
0.5827073231370122	-1.2224514703614366
0.5829929956127026	-1.2251266407764918
0.5832786966736373	-1.2278051790367395
0.5835644262724505	-1.2304870871132425
0.5838501843618791	-1.233172366977032
0.5841359708947635	-1.2358610205991083
0.5844217858240474	-1.238553049950439
0.5847076291027765	-1.2412484570019637
0.5849935006840999	-1.2439472437245864
0.5852794005212686	-1.2466494120891856
0.5855653285676353	-1.2493549640666046
0.5858512847766546	-1.2520639016276591
0.5861372691018822	-1.2547762267431308
0.5864232814969756	-1.2574919413837753
0.5867093219156924	-1.2602110475203125
0.586995390311891	-1.2629335471234364
0.5872814866395303	-1.2656594421638077
0.5875676108526691	-1.2683887346120586
0.5878537629054659	-1.2711214264387898
0.5881399427521786	-1.2738575196145736
0.5884261503471647	-1.2765970161099496
0.5887123856448804	-1.2793399178954308
0.5889986485998806	-1.2820862269414968
0.5892849391668185	-1.284835945218601
0.5895712573004458	-1.2875890746971637
0.589857602955612	-1.2903456173475782
0.5901439760872639	-1.293105575140206
0.5904303766504462	-1.2958689500453817
0.5907168046003003	-1.2986357440334073
0.5910032598920647	-1.3014059590745595
0.5912897424810746	-1.304179597139081
0.591576252322761	-1.3069566601971894
0.5918627893726517	-1.3097371502190702
0.59214935358637	-1.3125210691748828
0.5924359449196342	-1.3153084190347544
0.5927225633282593	-1.3180992017687865
0.593009208768154	-1.320893419347048
0.5932958811953226	-1.3236910737395844
0.5935825805658635	-1.3264921669164058
0.5938693068359701	-1.3292967008475
0.5941560599619287	-1.3321046775028225
0.5944428399001207	-1.334916098852302
0.5947296466070201	-1.3377309668658368
0.5950164800391947	-1.3405492835133002
0.5953033401533052	-1.3433710507645342
0.5955902269061052	-1.3461962705893544
0.5958771402544407	-1.3490249449575467
0.5961640801552502	-1.3518570758388715
0.5964510465655642	-1.3546926652030584
0.5967380394425051	-1.357531715019812
0.5970250587432868	-1.3603742272588057
0.5973121044252147	-1.3632202038896892
0.5975991764456849	-1.36606964688208
0.5978862747621851	-1.3689225582055728
0.598173399332293	-1.3717789398297304
0.5984605501136768	-1.3746387937240914
0.5987477270640951	-1.3775021218581645
0.5990349301413961	-1.3803689262014338
0.5993221593035181	-1.3832392087233534
0.5996094145084883	-1.386112971393352
0.5998966957144235	-1.3889902161808303
0.6001840028795293	-1.3918709450551632
0.6004713359621002	-1.3947551599856964
0.6007586949205191	-1.3976428629417517
0.6010460797132571	-1.4005340558926203
0.6013334902988734	-1.403428740807571
0.601620926636015	-1.406326919655842
0.6019083886834165	-1.409228594406647
0.6021958763998998	-1.4121337670291727
0.6024833897443742	-1.4150424394925791
0.6027709286758351	-1.4179546137659997
0.6030584931533658	-1.4208702918185427
0.6033460831361348	-1.4237894756192884
0.6036336985833977	-1.4267121671372915
0.6039213394544953	-1.4296383683415805
0.6042090057088553	-1.4325680812011585
0.6044966973059895	-1.435501307685001
0.6047844142054963	-1.43843804976206
0.6050721563670584	-1.4413783094012587
0.6053599237504437	-1.444322088571496
0.6056477163155044	-1.4472693892416462
0.6059355340221778	-1.4502202133805542
0.6062233768304848	-1.453174562957044
0.6065112447005303	-1.45613243993991
0.6067991375925036	-1.4590938462979235
0.6070870554666765	-1.4620587839998287
0.6073749982834052	-1.465027255014346
0.6076629660031283	-1.467999261310169
0.6079509585863679	-1.4709748048559679
0.6082389759937279	-1.4739538876203846
0.6085270181858958	-1.47693651157204
0.6088150851236404	-1.4799226786795252
0.609103176767813	-1.4829123909114115
0.6093912930793467	-1.48590565023624
0.6096794340192561	-1.4889024586225315
0.6099675995486373	-1.491902818038778
0.6102557896286677	-1.49490673045345
0.6105440042206054	-1.4979141978349912
0.6108322432857894	-1.500925222151822
0.6111205067856398	-1.503939805372336
0.6114087946816561	-1.5069579494649061
0.6116971069354186	-1.5099796563978762
0.6119854435085872	-1.5130049281395699
0.6122738043629022	-1.516033766658283
0.6125621894601826	-1.5190661739222904
0.6128505987623272	-1.5221021518998394
0.6131390322313138	-1.5251417025591556
0.6134274898291994	-1.528184827868439
0.6137159715181191	-1.5312315297958674
0.6140044772602873	-1.5342818103095912
0.614293007017996	-1.5373356713777413
0.6145815607536159	-1.5403931149684211
0.6148701384295951	-1.5434541430497124
0.61515874000846	-1.5465187575896715
0.615447365452814	-1.5495869605563335
0.6157360147253381	-1.5526587539177061
0.6160246877887903	-1.5557341396417779
0.6163133846060053	-1.5588131196965096
0.6166021051398953	-1.5618956960498422
0.6168908493534481	-1.5649818706696903
0.6171796172097287	-1.5680716455239474
0.6174684086718771	-1.5711650225804823
0.6177572237031108	-1.5742620038071418
0.6180460622667213	-1.5773625911717473
0.6183349243260774	-1.5804667866421005
0.6186238098446217	-1.583574592185976
0.6189127187858734	-1.5866860097711293
0.6192016511134252	-1.5898010413652897
0.6194906067909461	-1.5929196889361663
0.6197795857821784	-1.5960419544514428
0.6200685880509398	-1.5991678398787827
0.6203576135611215	-1.6022973471858242
0.6206466622766892	-1.6054304783401854
0.6209357341616822	-1.608567235309459
0.6212248291802137	-1.6117076200612181
0.62151394729647	-1.6148516345630117
0.6218030884747109	-1.6179992807823655
0.6220922526792695	-1.6211505606867833
0.6223814398745514	-1.6243054762437494
0.6226706500250353	-1.6274640294207208
0.6229598830952723	-1.630626222185137
0.6232491390498857	-1.6337920565044117
0.6235384178535711	-1.636961534345939
0.6238277194710963	-1.6401346576770892
0.6241170438673005	-1.643311428465212
0.624406391007095	-1.6464918486776332
0.6246957608554622	-1.6496759202816595
0.6249851533774557	-1.652863645244573
0.6252745685382008	-1.656055025533636
0.6255640063028931	-1.6592500631160867
0.625853466636799	-1.6624487599591447
0.6261429495052557	-1.6656511180300055
0.6264324548736706	-1.6688571392958438
0.6267219827075214	-1.6720668257238132
0.6270115329723559	-1.6752801792810452
0.6273011056337914	-1.6784972019346496
0.6275907006575152	-1.681717895651716
0.6278803180092841	-1.6849422623993104
0.6281699576549242	-1.6881703041444815
0.6284596195603303	-1.6914020228542523
0.6287493036914669	-1.6946374204956274
0.6290390100143667	-1.6978764990355883
0.6293287384951316	-1.701119260441099
0.6296184890999313	-1.704365706679097
0.6299082617950045	-1.707615839716504
0.6301980565466574	-1.710869661520218
0.6304878733212645	-1.7141271740571173
0.6307777120852677	-1.717388379294057
0.6310675728051773	-1.720653279197875
0.6313574554475702	-1.7239218757353854
0.6316473599790908	-1.7271941708733844
0.631937286366451	-1.7304701665786442
0.632227234576429	-1.73374986481792
0.6325172045758705	-1.7370332675579427
0.632807196331687	-1.740320376765427
0.6330972098108569	-1.7436111944070636
0.633387244980425	-1.7469057224495244
0.6336773018075019	-1.7502039628594597
0.6339673802592644	-1.7535059176035024
0.6342574803029546	-1.7568115886482614
0.6345476019058809	-1.7601209779603288
0.6348377450354166	-1.763434087506273
0.6351279096590006	-1.7667509192526465
0.6354180957441365	-1.7700714751659776
0.6357083032583938	-1.7733957572127779
0.6359985321694056	-1.7767237673595364
0.6362887824448704	-1.7800555075727245
0.6365790540525512	-1.7833909798187917
0.636869346960275	-1.7867301860641696
0.6371596611359331	-1.7900731282752682
0.6374499965474809	-1.7934198084184796
0.6377403531629373	-1.7967702284601743
0.6380307309503854	-1.8001243903667052
0.6383211298779716	-1.8034822961044028
0.6386115499139057	-1.8068439476395826
0.6389019910264602	-1.8102093469385345
0.6391924531839718	-1.813578495967535
0.6394829363548389	-1.8169513966928368
0.6397734405075237	-1.8203280510806763
0.6400639656105502	-1.823708461097268
0.6403545116325055	-1.8270926287088087
0.640645078542038	-1.8304805558814758
0.6409356663078596	-1.8338722445814275
0.6412262748987428	-1.837267696774802
0.6415169042835233	-1.8406669144277195
0.6418075544310973	-1.8440698995062816
0.6420982253104232	-1.8474766539765692
0.6423889168905207	-1.8508871798046456
0.6426796291404704	-1.8543014789565544
0.6429703620294144	-1.857719553398321
0.6432611155265553	-1.8611414050959512
0.6435518896011572	-1.8645670360154336
0.6438426842225436	-1.8679964481227354
0.6441334993601001	-1.871429643383808
0.6444243349832711	-1.8748666237645821
0.6447151910615625	-1.8783073912309707
0.6450060675645387	-1.8817519477488684
0.6452969644618259	-1.8852002952841511
0.6455878817231084	-1.888652435802675
0.645878819318131	-1.8921083712702809
0.6461697772166975	-1.8955681036527872
0.6464607553886715	-1.8990316349159977
0.6467517538039753	-1.9024989670256953
0.6470427724325906	-1.9059701019476463
0.6473338112445575	-1.9094450416475974
0.6476248702099754	-1.9129237880912786
0.6479159492990019	-1.9164063432444007
0.6482070484818533	-1.919892709072657
0.6484981677288039	-1.9233828875417214
0.6487893070101866	-1.9268768806172523
0.6490804662963918	-1.930374690264888
0.6493716455578683	-1.9338763184502497
0.6496628447651224	-1.9373817671389402
0.649954063888718	-1.9408910382965459
0.6502453028992763	-1.944404133888633
0.6505365617674763	-1.9479210558807536
0.6508278404640541	-1.9514418062384378
0.651119138959802	-1.9549663869272011
0.6514104572255704	-1.9584947999125393
0.6517017952322659	-1.9620270471599335
0.6519931529508516	-1.965563130634843
0.6522845303523475	-1.9691030523027142
0.6525759274078295	-1.9726468141289726
0.6528673440884303	-1.9761944180790283
0.6531587803653383	-1.9797458661182725
0.6534502362097977	-1.9833011602120802
0.6537417115931089	-1.9868603023258076
0.6540332064866281	-1.990423294424797
0.6543247208617663	-1.9939901384743692
0.654616254689991	-1.997560836439831
0.6549078079428239	-2.0011353902864695
0.6551993805918429	-2.004713801979557
0.6554909726086798	-2.008296073484348
0.6557825839650224	-2.0118822067660793
0.6560742146326125	-2.0154722037899706
0.6563658645832469	-2.0190660665212268
0.6566575337887767	-2.022663796925032
0.6569492222211073	-2.0262653969665583
0.6572409298521987	-2.0298708686109554
0.6575326566540647	-2.033480213823363
0.6578244025987732	-2.037093434568896
0.6581161676584458	-2.0407105328126605
0.658407951805258	-2.0443315105197395
0.6586997550114387	-2.047956369655204
0.6589915772492707	-2.0515851121841044
0.6592834184910894	-2.0552177400714795
0.659575278709284	-2.0588542552823452
0.6598671578762968	-2.0624946597817075
0.6601590559646225	-2.0661389555345506
0.6604509729468092	-2.069787144505846
0.6607429087954574	-2.073439228660546
0.6610348634832204	-2.0770952099635895
0.6613268369828036	-2.080755090379896
0.6616188292669651	-2.084418871874371
0.661910840308515	-2.088086556411902
0.6622028700803153	-2.0917581459573626
0.6624949185552805	-2.0954336424756073
0.6627869857063766	-2.0991130479314797
0.6630790715066212	-2.102796364289799
0.6633711759290835	-2.1064835935153754
0.6636632989468841	-2.1101747375730002
0.6639554405331957	-2.1138697984274515
0.664247600661241	-2.1175687780434855
0.6645397793042949	-2.1212716783858485
[truncated: 47,991 more rows]
