# Supplementary material for: Critical Phenomena of Charged AdS Black Holes in Rastall Gravity
Source: Hindawi journal article supplement (doi:10.1155/2020/4065254), 2020-01-24
Supplement: f1 [file 4065254.f1.zip › Fig3(b)-GT4.dat]

2716.657230228717	-1.6683928551566054
213.31801617597762	-0.3727000443545595
43.48555934011114	-0.07536139053756145
13.096212721006225	0.03467359991296317
4.916436520372983	0.08473465969187305
2.162747036979596	0.11019639175525668
1.100216256514308	0.12400760429542011
0.6535553639067686	0.13176815940213601
0.4560585776190891	0.13618668547043225
0.36689832654270127	0.13868212776900968
0.32712663452250546	0.14004280841909658
0.31046319622308527	0.140726338570266
0.3046510922546162	0.14100712071530752
0.3038021908054107	0.14105351653016712
0.30504764652259286	0.14097029783832818
0.3069956441194046	0.1408229891138427
0.3089918879705653	0.14065231928193947
0.3107536039169787	0.14048305660768562
0.3121840948085537	0.14032954564674244
0.3132773286276118	0.14019925136183387
0.31406854181518795	0.14009506860981172
0.3146088000762073	0.14001684990723845
0.31495218486393295	0.13996242873173995
0.31514966642720743	0.13992831181558055
0.31524650306981244	0.1399101510654272
0.3152814678977924	0.139903066899115
0.3152869861118497	0.1399018703071665
0.3152896894545924	0.13990121524482724
0.31531112588876936	0.13989570273069146
0.31536848956292063	0.13987995126790737
0.31547530562987547	0.1398486436786375
0.3156420421386772	0.13979655737741825
0.3158766411561713	0.13971858301092321
0.31618497136633983	0.1396097349414968
0.3165712090622117	0.1394651560408363
0.3170381561746721	0.13928011854986933
0.31758750417462056	0.1390500222583333
0.3182200521225942	0.13877039089986282
0.31893588625503877	0.13843686740244887
0.3197345275209854	0.1380452084502045
0.3206150525359388	0.13759127867972254
0.32157619255687986	0.13707104473840806
0.3226164143241841	0.13648056936271938
0.3237339859652793	0.13581600558394638
0.3249270306041768	0.1350735911327502
0.3261935698598271	0.13424964308741047
0.3275315590326652	0.13334055279184884
0.32893891546115106	0.13234278105603078
0.3304135412680266	0.13125285364184802
0.331953341500146	0.13006735703098432
0.33355623848816074	0.12878293446679356
0.33522018310633545	0.12739628225929323
0.33694316349276365	0.12590414634057365
0.3387232116915809	0.12430331905693642
0.34055840859762343	0.1225906361836658
0.34244688751720015	0.1207629741483365
0.34438683660365493	0.11881724744884807
0.3463765003810765	0.11675040625284629
0.34841418053213935	0.11455943416579281
0.35049823609521236	0.11224134615561064
0.3526270831903856	0.10979318662254019
0.35479919437300883	0.107212027603557
0.35701309769590506	0.10449496710141352
0.3592673755470047	0.1016391275290574
0.36156066331720116	0.09864165426084136
0.3638916479433344	0.09549971428257313
0.36625906636300787	0.0922104949330449
0.36866170391114994	0.08877120273024461
0.3710983926825936	0.08517906227596822
0.3735680098802834	0.08143131523304073
0.37606947616484787	0.07752521936980053
0.37860175401807583	0.07345804766692025
0.3811638461301857	0.06922708748202028
0.3837547938185875	0.06482963976788537
0.38637367548403484	0.060263018340423816
0.38901960510857514	0.05552454919280635
0.3916917307984866	0.050611569852500565
0.3943892333743928	0.04552142877817067
0.3971113250099256	0.04025148479364507
0.39985724791965066	0.03479910655637122
0.40262627309643056	0.02916167205797164
0.4054176990979744	0.023336568154699755
0.40823085088197997	0.01732119012575753
0.41106507868901054	0.011112941257593212
0.4139197569720369	0.004709232452435555
0.41679428337142227	-0.0018925181405477776
0.41968807773400857	-0.008694885472960961
0.422600581174884	-0.01570043792514489
0.4255312551803557	-0.0229117376156793
0.42847958075062054	-0.030331340693611028
0.43144505758061524	-0.03796179761451597
0.43442720327752743	-0.04580565340141739
0.4374255526134652	-0.053865447891516385
0.440439656811804	-0.062143715969618624
0.4434690828657619	-0.07064298778908241
0.44651341288778973	-0.07936578898105538
0.44957224348840424	-0.08831464085271165
0.4526451851831336	-0.09749206057515862
0.45573186182629416	-0.10690056136162848
0.4588319100703588	-0.11654265263653715
0.46194497884973196	-0.12642084019594724
0.4650707288877871	-0.1365376263599405
0.46820883222607385	-0.1468955101173693
0.47135897177464925	-0.15749698726342665
0.474520840882531	-0.168344550530447
0.4776941429273163	-0.17944068971232136
0.4808785909230566	-0.19078789178288685
0.48407390714551507	-0.20238864100862897
0.4872798227739793	-0.2142454190560098
0.49049607754884034	-0.22636070509372122
0.49372241944418427	-0.2387369758901382
0.4969586043546812	-0.2513767059062352
0.5002043957960929	-0.264282367384206
0.5034595646187485	-0.2774564304320224
0.5067238887333751	-0.2909013631041418
0.5099971528486973	-0.3046196314785706
0.5132791482202481	-0.318613699730471
0.5165696724098655	-0.3328860302024939
0.5198685290553684	-0.34743908347200303
0.523175527649938	-0.3622753184153522
0.5264904833307493	-0.37739719226936475
0.5298132166764212	-0.3928071606901553
0.5331435535128762	-0.40850767780942837
0.536481324727222	-0.4245011962883785
0.5398263660892817	-0.44079016736931
0.5431785180804246	-0.4573770409250903
0.5465376257293608	-0.4742642655065388
0.5499035384545844	-0.4914542883878558
0.5532761099131609	-0.5089495556101802
0.556655197855575	-0.5267525120233709
0.5600406639863629	-0.5448656013260914
0.5634323738302704	-0.5632912661042808
0.5668301966036929	-0.5820319478680849
0.570234005091158	-0.6010900870873193
0.5736436755266302	-0.6204681232255316
0.5770590874794255	-0.6401684947727306
0.5804801237445317	-0.6601936392768366
0.5839066702371449	-0.6805459933739169
0.5873386158912338	-0.7012279928172573
0.590775852561965	-0.7222420725053249
0.5942182749318161	-0.7435906665086675
0.5976657804202216	-0.7652762080957974
0.6011182690966018	-0.7873011297581111
0.6045756435966274	-0.8096678632338735
0.608037809041588	-0.8323788395313185
0.6115046729607285	-0.8554364889509006
0.6149761452164337	-0.878843241106733
0.6184521379321405	-0.9026015249472441
0.6219325654228619	-0.9267137687750937
0.6254173441282219	-0.9511824002663695
0.6289063925478899	-0.9760098464891028
0.6323996311793227	-1.001198533921127
0.6358969824577174	-1.026750888467304
0.6393983706980857	-1.0526693354761545
0.6429037220393652	-1.0789562997559001
0.6464129643904848	-1.105614205589958
0.6499260273783074	-1.1326454767518985
0.6534428422973739	-1.160052536519894
0.6569633420613787	-1.1878378076906702
0.6604874611563076	-1.216003712592996
0.6640151355951726	-1.2445526731007104
0.6675463028742833	-1.2734871106453194
0.6710809019309937	-1.3028094462281719
0.6746188731028664	-1.3325221004322354
0.6781601580882027	-1.3626274934334823
0.6817046999078848	-1.3931280450119057
0.6852524428684782	-1.4240261745621774
0.6888033325265501	-1.4553243011039603
0.6923573156541576	-1.487024843291892
0.6959143402054561	-1.5191302194252447
0.6994743552843953	-1.5516428474572832
0.7030373111134548	-1.5845651450043234
0.7066031590033846	-1.6178995293545078
0.7101718513239116	-1.6516484174763066
0.713743341475379	-1.6858142260267526
0.7173175838612814	-1.720399371359423
0.7208945338616661	-1.755406269532176
0.7244741478073679	-1.7908373363146475
0.7280563829550459	-1.8266949871955227
0.731641197462998	-1.8629816373895876
0.7352285503677202	-1.899699701844562
0.7388184015611866	-1.936851595247738
0.742410711768827	-1.9744397320324092
0.7460054425281724	-2.0124665263841175
0.7496025561681496	-2.050934392246711
0.7532020157889998	-2.089845743328225
0.7568037852428006	-2.129202993106593
0.7604078291145699	-2.169008554835188
0.7640141127039323	-2.2092648415482032
0.7676226020073287	-2.2499742660658866
0.7712332637007495	-2.2911392409996103
0.7748460651229752	-2.3327621787568087
0.7784609742593067	-2.3748454915457677
0.7820779597257685	-2.417391591380291
0.7856969907537688	-2.4604028900842128
0.7893180371752014	-2.5038817992958102
0.7929410694079774	-2.5478307304720733
0.7965660584419656	-2.5922520948928676
0.8001929758253375	-2.6371483036649783
0.8038217936512957	-2.6825217677260405
0.807452484545177	-2.728374897848368
0.8110850216519178	-2.7747101046426783
0.8147193786238688	-2.821529798561702
0.8183555296089502	-2.868836389903722
0.821993449239132	-2.916632288815989
0.8256331126192351	-2.964919905298065
0.829274495316038	-3.013701649205079
0.8329175733476808	-3.0629799302508727
0.8365623231733589	-3.112757158011099
0.8402087216832951	-3.1630357419262034
0.8438567461889824	-3.2138180913043635
0.8475063744136889	-3.2651066153243136
0.8511575844832179	-3.316903723038136
0.8548103549169106	-3.369211823373942
0.8584646646188923	-3.42203332513852
0.8621204928695461	-3.4753706370198816
0.8657778193172133	-3.5292261675897802
0.8694366239701085	-3.583602325306123
0.8730968871884488	-3.6385015185153686
0.8767585896767847	-3.6939261554548186
0.8804217124765318	-3.749878644254896
0.8840862369586924	-3.806361392941325
0.8877521448167666	-3.8633768094372964
0.8914194180598416	-3.920927301565542
0.8950880390058604	-3.9790152770503946
0.8987579902750571	-4.037643143519758
0.9024292547835617	-4.09681330850708
0.9061018157371629	-4.156528179453214
0.9097756566252293	-4.2167901637083
0.9134507612147799	-4.277601668533542
0.9171271135447046	-4.338965101103007
0.920804697920125	-4.400882868505304
0.9244834989068967	-4.463357377745294
0.9281635013262453	-4.526391035745725
0.9318446902495322	-4.5899862493488115
0.9355270509931515	-4.654145425317837
0.9392105691135476	-4.718870970338639
0.9428952304023545	-4.784165291021139
0.9465810208816514	-4.850030793900767
0.9502679267993339	-4.916469885439913
0.9539559346245932	-4.983484972029291
0.9576450310435053	-5.051078459989327
0.9613352029547231	-5.119252755571456
0.9650264374652714	-5.188010264959451
0.9687187218864395	-5.257353394270661
0.9724120437297722	-5.327284549557277
0.9761063907031523	-5.397806136807521
0.9798017507069757	-5.468920561946858
0.9834981118304139	-5.540630230839118
0.9871954623477649	-5.612937549287667
0.9908937907148845	-5.685844923036485
0.9945930855657041	-5.759354757771273
0.998293335708824	-5.833469459120483
1.0019945301241864	-5.908191432656389
1.0056966579598225	-5.983523083896071
1.0093997085286759	-6.059466818302429
1.0131036713054915	-6.1360250412851265
1.0168085359237826	-6.213200158201578
1.0205142921728583	-6.290994574357843
1.0242209299949203	-6.369410695009548
1.0279284394822261	-6.448450925362784
1.0316368108743095	-6.52811767057496
1.035346034555268	-6.608413335755675
1.0390561010511055	-6.6893403259675335
1.0427670010271368	-6.770901046226985
1.0464787252854448	-6.853097901505089
1.0501912647623959	-6.9359332967283445
1.0539046105262082	-7.019409636779407
1.0576187537745718	-7.103529326497888
1.0613336858323204	-7.188294770681047
1.0650493981491538	-7.273708374084546
1.0687658822974069	-7.359772541423126
1.0724831299698674	-7.44648967737133
1.0762011329776415	-7.533862186564149
1.0799198832480614	-7.62189247359771
1.0836393728226374	-7.710582943029903
1.0873595938550573	-7.799935999381045
1.0910805386092206	-7.889954047134475
1.0948021994573196	-7.980639490737199
1.0985245688779572	-8.071994734600448
1.1022476394543053	-8.164022183100306
1.1059714038722988	-8.25672424057826
1.109695854918871	-8.350103311341774
1.1134209854802197	-8.444161799664855
1.1171467885401136	-8.53890210978855
1.1208732571782312	-8.634326645921544
1.1246003845685306	-8.730437812240629
1.1283281639776588	-8.827238012891245
1.1320565887633864	-8.924729651987958
1.1357856523730783	-9.022915133614985
1.139515348342192	-9.121796861826631
1.1432456702928093	-9.221377240647818
1.1469766119321914	-9.321658674074499
1.1507081670513712	-9.422643566074141
1.1544403295237646	-9.52433432058616
1.1581730933038155	-9.626733341522376
1.1619064524256633	-9.729843032767423
1.1656404010018413	-9.833665798179187
1.1693749332219923	-9.938204041589199
1.173110043351621	-10.043460166803076
1.1768457257308582	-10.149436577600882
1.1805819747732578	-10.25613567773755
1.1843187849646126	-10.363559870943247
1.1880561508617957	-10.471711560923765
1.1917940670916192	-10.580593151360867
1.1955325283497218	-10.690207045912695
1.1992715293994713	-10.800555648214074
1.2030110650708914	-10.911641361876912
1.2067511302596068	-11.023466590490491
1.2104917199258105	-11.136033737621865
1.2142328290932483	-11.249345206816148
1.2179744528482228	-11.363403401596845
1.2217165863386177	-11.478210725466198
1.2254592247729377	-11.593769581905462
1.2292023634193687	-11.710082374375258
1.2329459976048536	-11.827151506315824
1.2366901227141844	-11.944979381147371
1.2404347341891158	-12.063568402270317
1.244179827527489	-12.182920973065638
1.2479253982823733	-12.303039496895073
1.2516714420612278	-12.423926377101488
1.2554179545250723	-12.545584017009066
1.2591649313876756	-12.668014819923654
1.262912368414759	-12.79122118913294
1.2666602614232152	-12.915205527906812
1.2704086062803368	-13.039970239497507
1.274157398903065	-13.165517727139948
1.2779066352572457	-13.291850394051933
1.2816563113569022	-13.41897064343442
1.285406423263521	-13.546880878471717
1.2891569670853489	-13.67558350233176
1.2929079389767015	-13.805080918166306
1.2966593351372881	-13.935375529111196
1.300411151811544	-14.066469738286536
1.3041633852879755	-14.19836594879695
1.3079160318985186	-14.331066563731776
1.311669088017907	-14.464573986165272
1.31542255006305	-14.598890619156846
1.3191764144924247	-14.734018865751231
1.3229306778054748	-14.869961128978721
1.3266853365420213	-15.006719811855318
1.330440387281686	-15.144297317382982
1.3341958266433187	-15.28269604854978
1.3379516512844412	-15.421918408330102
1.3417078579006951	-15.56196679968481
1.345464443225302	-15.702843625561483
1.3492214040285326	-15.844551288894504
1.3529787371171837	-15.987092192605328
1.3567364393340653	-16.13046873960258
1.3604945075574935	-16.274683332782303
1.3642529387007967	-16.419738375028025
1.3680117297118262	-16.565636269211044
1.3717708775724746	-16.712379418190466
1.3755303792982065	-16.859970224813463
1.379290231937592	-17.008411091915377
1.3830504325718505	-17.157704422319902
1.3868109783144018	-17.307852618839203
1.3905718663104247	-17.458858084274112
1.394333093736421	-17.61072322141423
1.3980946577997901	-17.76345043303809
1.4018565557384068	-17.91704212191333
1.4056187848202084	-18.07150069079677
1.4093813423427881	-18.22682854243462
1.4131442256329934	-18.383028079562543
1.4169074320465338	-18.54010170490587
1.4206709589675919	-18.698051821179654
1.4244348038084431	-18.856880831088862
1.428198964009079	-19.01659113732847
1.43196343703684	-19.177185142583596
1.4357282203860493	-19.338665249529612
1.4394933115776585	-19.501033860832315
1.4432587081588928	-19.66429337914797
1.4470244077029062	-19.828446207123502
1.4507904078084393	-19.99349474739657
1.4545567060994862	-20.15944140259569
1.4583233002249598	-20.32628857534035
1.4620901878583719	-20.49403866824115
1.465857366697508	-20.66269408389984
1.4696248344641167	-20.83225722490952
1.4733925889035953	-21.002730493854667
1.477160627784688	-21.174116293311304
1.4809289488991821	-21.346417025847046
1.4846975500616149	-21.519635094021247
1.4884664291089784	-21.693772900385078
1.4922355839004355	-21.868832847481634
1.496005012317037	-22.044817337846037
1.4997747122614404	-22.221728774005506
1.503544681657639	-22.399569558479495
1.5073149184506889	-22.57834209377973
1.5110854206064466	-22.75804878241038
1.514856186111303	-22.93869202686805
1.518627212971929	-23.120274229641964
1.522398499215019	-23.30279779321398
1.5261700428870417	-23.486265120058743
1.5299418420539936	-23.670678612643684
1.5337138948011553	-23.85604067342922
1.537486199232852	-24.042353704868717
1.5412587534722197	-24.229620109408675
1.5450315556609708	-24.417842289488714
1.5488046039591667	-24.607022647541758
1.5525778965449906	-24.797163585994006
1.5563514316145282	-24.988267507265103
1.5601252073815455	-25.180336813768175
1.5638992220772747	-25.37337390790984
1.5676734739502032	-25.567381192090433
1.5714479612658607	-25.762361068703946
1.5752226823066162	-25.958315940138174
1.5789976353714714	-26.155248208774726
1.5827728187758625	-26.35316027698915
1.5865482308514625	-26.552054547151002
1.5903238699459845	-26.751933421623843
1.594099734422992	-26.95279930276543
1.597875822661708	-27.154654592927635
1.6016521330568294	-27.357501694456634
1.6054286640183426	-27.561343009692912
1.6092054139713432	-27.76618094097135
1.6129823813558553	-27.972017890621235
1.6167595646266573	-28.17885626096642
1.6205369622531074	-28.386698454325288
1.624314572718973	-28.595546873010893
1.6280923945222592	-28.805403919330928
1.6318704261750474	-29.016271995587882
1.6356486662033256	-29.22815350407904
1.6394271131468305	-29.441050847096562
1.6432057655588859	-29.654966426927476
1.6469846220062458	-29.869902645853855
1.65076368106894	-30.0858619061528
1.6545429413401191	-30.302846610096474
1.6583224014259057	-30.520859159952156
1.6621020599452432	-30.73990195798239
1.6658819155297522	-30.959977406444903
1.6696619668235824	-31.18108790759278
1.6734422124832706	-31.40323586367438
1.6772226511776018	-31.626423676933516
1.6810032815874674	-31.85065374960944
1.68478410240573	-32.07592848393692
1.6885651123370868	-32.30225028214621
1.6923463100979381	-32.529621546463204
1.6961276944162529	-32.75804467910944
1.6999092640314417	-32.98752208230212
1.7036910176942273	-33.218056158254214
1.7074729541665166	-33.44964930917442
1.71125507222128	-33.682303937267285
1.7150373706424247	-33.91602244473324
1.7188198482246753	-34.15080723376862
1.7226025037734518	-34.38666070656566
1.7263853361047545	-34.62358526531267
1.730168344045045	-34.86158331219395
1.733951526431132	-35.10065724938991
1.737734882110057	-35.340809479077045
1.741518409938983	-35.58204240342802
1.745302108785084	-35.8243584246117
1.7490859775254344	-36.06775994479326
1.7528700150469023	-36.312249366134026
1.7566542202460438	-36.55782909079172
1.7604385920289962	-36.80450152092042
1.7642231293113766	-37.052269058670596
1.7680078310181768	-37.30113410618908
1.7717926960836647	-37.551099065619255
1.7755777234512844	-37.80216633910097
1.7793629120735568	-38.05433832877064
1.7831482609119824	-38.30761743676119
1.786933768936946	-38.5620060652022
1.790719435127623	-38.81750661621989
1.7945052584718841	-39.07412149193712
1.7982912379662044	-39.331853094473544
1.8020773726155708	-39.59070382594544
1.8058636614333936	-39.850676088465946
1.8096501034414176	-40.11177228414497
1.8134366976696334	-40.37399481508932
1.8172234431561909	-40.637346083402534
1.8210103389473151	-40.90182849118522
1.824797384097221	-41.16744444053481
1.8285845776680292	-41.43419633354575
1.832371918729684	-41.70208657230943
1.8361594063598745	-41.971117558914315
1.8399470396439506	-42.24129169544588
1.8437348176748463	-42.51261138398674
1.847522739553	-42.78507902661652
1.8513108043862774	-43.05869702541208
1.8550990112898966	-43.333467782447386
1.8588873593863509	-43.609393699793664
1.8626758478053334	-43.88647717951925
1.8664644756836666	-44.16472062368983
1.8702532421652276	-44.44412643436832
1.8740421464008763	-44.72469701361497
1.8778311875483835	-45.00643476348729
1.8816203647723635	-45.289342086040186
1.885409677244203	-45.57342138332595
1.889199124141993	-45.85867505739427
1.8929887046504614	-46.14510551029228
1.8967784179609046	-46.4327151440645
1.9005682632711256	-46.72150636075298
1.904358239785364	-47.01148156239727
1.908148346714236	-47.30264315103448
1.9119385832746663	-47.59499352869915
1.9157289486898295	-47.888535097423485
1.919519442189085	-48.1832702592373
1.9233100630079178	-48.47920141616797
1.9271008103878757	-48.776330970240515
1.9308916835765109	-49.07466132347764
1.9346826818273204	-49.37419487789974
1.9384738043996876	-49.67493403552491
1.942265050558824	-49.976881198368936
1.9460564195757122	-50.28003876844537
1.9498479107270499	-50.584409147765555
1.9536395232951944	-50.889994738338636
1.9574312565681051	-51.19679794217147
1.9612231098392927	-51.50482116126887
1.965015082407761	-51.814066797633444
1.968807173577959	-52.12453725326565
1.9725993826597217	-52.43623493016385
1.9763917089682241	-52.74916223032431
1.9801841518239263	-53.06332155574123
1.9839767105525232	-53.3787153084068
1.9877693844848963	-53.69534589031113
1.9915621729570598	-54.01321570344227
1.995355075310116	-54.33232714978633
1.9991480908902037	-54.65268263132748
2.0029412190484526	-54.97428455004786
2.006734459140933	-55.29713530792764
2.0105278105286115	-55.62123730694514
2.014321272577303	-55.946592949076766
2.0181148446576263	-56.273204636296995
2.0219085261449563	-56.60107477057841
2.025702316419382	-56.93020575389178
2.0294962148656617	-57.260599988206025
2.0332902208731762	-57.59225987548827
2.0370843338358893	-57.92518781770373
2.0408785531523033	-58.25938621681592
2.0446728782254167	-58.594857474786544
2.0484673084626817	-58.9316039935756
2.052261843275964	-59.269628175141214
2.0560564820815017	-59.60893242143991
2.0598512242998637	-59.949519134426424
2.0636460693559098	-60.291390716053854
2.067441016678753	-60.63454956827351
2.071236065701718	-60.97899809303514
2.0750312158623045	-61.324738692286786
2.078826466602145	-61.671773767974834
2.082621817366974	-62.02010572204412
2.0864172676065817	-62.36973695643775
2.0902128167747853	-62.72066987309729
2.0940084643293857	-63.07290687396277
2.0978042097321357	-63.4264503609726
2.1016000524487017	-63.78130273606359
2.1053959919486283	-64.13746640117108
2.1091920277053062	-64.49494375822884
2.1129881591959325	-64.85373720916918
2.116784385901481	-65.2138491559228
2.120580707306665	-65.57528200041895
2.124377122899905	-65.93803814458548
2.128173632173297	-66.3021199903487
2.1319702346225755	-66.6675299396334
2.135766929747086	-67.03427039436308
2.139563717049749	-67.40234375645971
2.143360596037029	-67.77175242784392
2.147157566218904	-68.14249881043479
2.150954627108835	-68.51458530615014
2.154751778223732	-68.88801431690635
2.1585490190839267	-69.26278824461852
2.1623463492131405	-69.63890949120024
2.1661437681384546	-70.01638045856384
2.1699412753902827	-70.39520354862033
2.1737388705023397	-70.77538116327933
2.1775365530116124	-71.15691570444929
2.181334322458331	-71.53980957403712
2.185132178385943	-71.92406517394863
2.1889301203410834	-72.3096849060883
2.1927281478735456	-72.69667117235933
2.196526260536258	-73.08502637466364
2.2003244578852508	-73.47475291490188
2.204122739479636	-73.86585319497358
2.207921104881576	-74.25832961677696
2.211719553656259	-74.65218458220895
2.2155180853718712	-75.04742049316538
2.2193166995995743	-75.4440397515408
2.2231153959134775	-75.84204475922871
2.226914173890613	-76.24143791812122
2.230713033110909	-76.64222163010946
2.2345119731571703	-77.04439829708329
2.2383109936150465	-77.44797032093147
2.2421100940730145	-77.85294010354157
2.2459092741223503	-78.25931004680002
2.249708533357106	-78.66708255259225
2.2535078713740884	-79.07626002280247
2.2573072877728317	-79.48684485931373
2.261106782155578	-79.8988394640081
2.264906354127255	-80.31224623876653
2.268706003295449	-80.72706758546886
2.2725057292703874	-81.14330590599387
2.276305531664913	-81.56096360221929
2.2801054100944644	-81.98004307602179
2.2839053641770537	-82.400546729277
2.2877053935332445	-82.82247696385953
2.291505497786131	-83.24583618164287
2.295305676561316	-83.67062678449959
2.2991059294868927	-84.09685117430125
2.3029062561934226	-84.52451175291837
2.3067066563139114	-84.9536109222204
2.310507129483797	-85.38415108407595
2.3143076753409213	-85.81613464035254
2.318108293525515	-86.24956399291679
2.3219089836801774	-86.68444154363424
2.325709745449855	-87.12076969436961
2.329510578481824	-87.55855084698659
2.3333114824256733	-87.99778740334796
2.3371124569332786	-88.43848176531552
2.340913501658791	-88.88063633475014
2.3447146162586168	-89.32425351351183
2.348515800391397	-89.76933570345972
2.3523170537179885	-90.21588530645184
2.3561183759014517	-90.66390472434551
2.3599197666070255	-91.11339635899706
2.3637212255021165	-91.56436261226204
2.3675227522562756	-92.01680588599493
2.3713243465411837	-92.47072858204952
2.3751260080306356	-92.92613310227864
2.3789277364005206	-93.3830218485343
2.3827295313288075	-93.8413972226677
2.3865313924955256	-94.30126162652898
2.3903333195827527	-94.76261746196772
2.394135312274593	-95.2254671308325
2.3979373702571674	-95.68981303497115
2.4017394932185905	-96.15565757623058
2.40554168084896	-96.62300315645697
2.409343932840339	-97.09185217749567
2.413146248886742	-97.56220704119124
2.416948628684117	-98.0340701493874
2.4207510719303307	-98.5074439039271
2.4245535783251557	-98.98233070665253
2.428356147570255	-99.45873295940515
2.432158779369162	-99.93665306402542
2.435961473427275	-100.41609342235333
2.4397642294518342	-100.89705643622789
2.443567047151913	-101.3795445074875
2.4473699262383994	-101.86356003796965
2.451172866423986	-102.34910542951127
2.4549758674231517	-102.8361830839484
2.458778928952153	-103.32479540311647
2.4625820507290044	-103.81494478885001
2.4663852324734674	-104.30663364298302
2.4701884739070414	-104.79986436734865
2.4739917747529416	-105.29463936377938
2.4777951347360925	-105.79096103410708
2.481598553583112	-106.28883178016272
2.4854020310222995	-106.78825400377666
2.4892055667836215	-107.28923010677863
2.4930091605987017	-107.7917624909977
2.4968128122008038	-108.29585355826202
2.5006165213248237	-108.80150571039934
2.5044202877072745	-109.30872134923659
2.508224111086275	-109.8175028766001
2.5120279912015357	-110.32785269431544
2.5158319277943497	-110.83977320420765
2.519635920607579	-111.35326680810101
2.5234399693856426	-111.8683359078193
2.5272440738745052	-112.38498290518541
2.5310482338216653	-112.90321020202181
2.5348524489761424	-113.42302020015025
2.5386567190884692	-113.9444153013919
2.542461043910677	-114.46739790756719
2.546265423196284	-114.99197042049602
2.5500698567002873	-115.51813524199771
2.5538743441791505	-116.04589477389091
2.557678885390789	-116.57525141799361
2.5614834800945663	-117.10620757612331
2.5652881280512783	-117.63876565009681
2.5690928290231425	-118.17292804173043
2.5728975827737903	-118.7086971528398
2.5767023890682537	-119.24607538523993
2.580507247672957	-119.78506514074539
2.5843121583557065	-120.32566882117007
2.588117120885679	-120.86788882832738
2.5919221350334096	-121.41172756402995
2.595727200570789	-121.95718743009004
2.5995323172710463	-122.50427082831936
2.603337484908741	-123.05298016052899
2.6071427032597567	-123.60331782852933
2.6109479721012865	-124.15528623413043
2.614753291211826	-124.70888777914176
2.618558660371165	-125.26412486537224
2.6223640793603753	-125.8209998946301
2.6261695479618017	-126.37951526872321
2.6299750659590573	-126.93967338945886
2.633780633137008	-127.50147665864387
2.6375862492817643	-128.06492747808437
2.6413919141806796	-128.6300282495861
2.645197627622332	-129.19678137495427
2.649003389396519	-129.7651892559936
2.6528091992942513	-130.33525429450813
2.6566150571077407	-130.90697889230162
2.660420962630391	-131.48036545117722
2.6642269156567946	-132.05541637293757
2.6680329159827174	-132.63213405938487
2.671838963405094	-133.2105209123208
2.6756450577220203	-133.79057933354645
2.6794511987327434	-134.37231172486258
2.6832573862376514	-134.95572048806946
2.6870636200382703	-135.54080802496674
2.6908698999372525	-136.12757673735365
2.694676225738369	-136.71602902702904
2.6984825972465027	-137.30616729579125
2.702289014267641	-137.89799394543803
2.7060954766088643	-138.4915113777668
2.7099019840783423	-139.08672199457453
2.713708536485327	-139.68362819765764
2.7175151336401386	-140.28223238881213
2.7213217753541667	-140.88253696983358
2.7251284614398577	-141.4845443425171
2.728935191710706	-142.0882569086574
2.7327419659812513	-142.6936770700486
2.7365487840670677	-143.30080722848453
2.7403556457847595	-143.90964978575852
2.7441625509519505	-144.52020714366358
2.7479694993872794	-145.13248170399206
2.751776490910392	-145.7464758685361
2.755583525341934	-146.36219203908732
2.7593906025035464	-146.97963261743678
2.7631977222178543	-147.59880000537555
2.7670048843084625	-148.21969660469375
2.7708120885999508	-148.84232481718144
2.7746193349178627	-149.4666870446282
2.7784266230887025	-150.09278568882308
2.782233952939928	-150.72062315155486
2.7860413242999424	-151.35020183461188
2.7898487369980893	-151.98152413978198
2.7936561908646462	-152.61459246885283
2.7974636857308166	-153.24940922361142
2.801271221428725	-153.88597680584456
2.8050787977914133	-154.52429761733856
2.808886414652828	-155.1643740598795
2.81269407184782	-155.8062085352528
2.8165017692121355	-156.4498034452437
2.8203095065824106	-157.0951611916371
2.8241172837961663	-157.74228417621737
2.8279251006918007	-158.3911748007685
2.8317329571085845	-159.0418354670743
2.835540852886654	-159.69426857691798
2.839348787867008	-160.3484765320826
2.843156761891497	-161.00446173435063
2.8469647748028217	-161.6622265855043
2.850772826444527	-162.32177348732554
2.854580916660995	-162.98310484159578
2.858389045297438	-163.6462230500963
2.8621972121998973	-164.31113051460764
2.866005417215234	-164.97782963691043
2.8698136601911233	-165.64632281878468
2.8736219409760535	-166.3166124620102
2.877430259419315	-166.98870096836623
2.881238615370998	-167.66259073963192
2.885047008681989	-168.338284177586
2.8888554392039603	-169.01578368400683
2.8926639067893687	-169.69509166067235
2.8964724112914513	-170.3762105093603
2.900280952564217	-171.05914263184812
2.9040895304624414	-171.74389042991277
2.9078981448416665	-172.43045630533095
2.91170679555819	-173.11884265987905
2.915515482469065	-173.8090518953331
2.9193242054320914	-174.50108641346893
2.923132964305812	-175.19494861606188
2.926941758949509	-175.89064090488694
2.9307505892231998	-176.58816568171906
2.9345594549876273	-177.28752534833265
2.938368356104263	-177.98872230650178
2.9421772924352942	-178.69175895800035
2.945986263843625	-179.39663770460186
2.949795270192869	-180.1033609480795
2.953604311347347	-180.81193109020643
2.9574133871720782	-181.52235053275493
2.96122249753278	-182.23462167749744
2.9650316422958634	-182.94874692620604
2.9688408213284245	-183.66472868065247
2.972650034498243	-184.38256934260798
2.976459281673779	-185.1022713138438
2.9802685627241665	-185.82383699613075
2.984077877519209	-186.5472687912395
2.987887225929376	-187.2725691009401
2.9916966078258	-187.9997403270026
2.995506023080268	-188.7287848711967
2.9993154715652253	-189.45970513529187
3.0031249531537605	-190.1925035210571
3.006934467719611	-190.92718243026127
3.0107440151371545	-191.66374426467297
3.014553595281405	-192.40219142606057
3.018363208028008	-193.14252631619186
3.0221728532532413	-193.8847513368348
3.0259825308340043	-194.6288688897567
3.029792240647818	-195.3748813767249
3.0336019825728227	-196.12279119950617
3.0374117564877685	-196.87260075986725
3.0412215622720167	-197.62431245957455
3.0450313998055343	-198.37792870039425
3.0488412689688884	-199.13345188409207
3.052651169643245	-199.89088441243376
3.0564611017103647	-200.65022868718458
3.060271065052598	-201.41148711010968
3.0640810595528825	-202.17466208297398
3.0678910850947383	-202.9397560075419
3.071701141562265	-203.70677128557784
3.07551122884014	-204.47571031884584
3.0793213468136096	-205.24657550910985
3.0831314953684923	-206.01936925813334
3.086941674391171	-206.79409396767986
3.0907518837685877	-207.57075203951223
3.094562123388246	-208.3493458753933
3.098372393138203	-209.12987787708582
3.1021826929070677	-209.91235044635212
3.1059930225839976	-210.6967659849543
3.109803382058693	-211.48312689465433
3.1136137712213974	-212.2714355772137
3.1174241899628927	-213.06169443439416
3.1212346381744935	-213.85390586795637
3.125045115748047	-214.64807227966165
3.128855622575929	-215.44419607127062
3.1326661585510402	-216.24227964454377
3.1364767235668034	-217.04232540124133
3.140287317517159	-217.84433574312342
3.1440979402965636	-218.64831307194973
3.147908591799986	-219.45425978947992
3.1517192719229064	-220.2621782974734
3.1555299805613064	-221.07207099768914
3.159340717611675	-221.88394029188615
3.1631514829709992	-222.69778858182315
3.1669622765367644	-223.5136182692585
3.17077309820695	-224.33143175595066
3.1745839478800257	-225.15123144365745
3.178394825454949	-225.9730197341369
3.1822057308311646	-226.79679902914657
3.1860166639085974	-227.62257173044375
3.1898276245876516	-228.45034023978565
3.1936386127692113	-229.28010695892934
3.1974496283546303	-230.1118742896316
3.2012606712457368	-230.94564463364895
3.205071741344823	-231.78142039273777
3.2088828385546515	-232.6192039686542
3.2126939627784434	-233.4589977631544
3.2165051139198817	-234.30080417799377
3.2203162918831043	-235.14462561492795
3.2241274965727063	-235.99046447571237
3.227938727893733	-236.83832316210223
3.2317499857516787	-237.68820407585238
3.235561270052484	-238.5401096187176
3.2393725807025344	-239.3940421924525
3.2431839176086554	-240.2500041988114
3.246995280678111	-241.1079980395486
3.250806669818601	-241.96802611641783
3.25461808493826	-242.83009083117295
3.2584295259456524	-243.69419458556763
3.26224099274977	-244.56033978135525
3.266052485260033	-245.42852882028902
3.269864003386283	-246.29876410412206
3.273675547038782	-247.17104803460705
3.277487116128214	-248.04538301349692
3.2812987105656726	-248.92177144254381
3.285110330262672	-249.80021572350017
3.2889219751311325	-250.68071825811808
3.2927336450833855	-251.56328144814955
3.2965453400321687	-252.44790769534626
3.3003570598906236	-253.33459940145977
3.3041688045722934	-254.2233589682415
3.307980573991121	-255.11418879744284
3.3117923680614454	-256.00709129081446
3.3156041866980006	-256.9020688501074
3.319416029815915	-257.7991238770724
3.323227897330706	-258.69825877345994
3.327039789158279	-259.5994759410204
3.330851705214924	-260.50277778150394
3.3346636454173177	-261.40816669666043
3.3384756096825163	-262.3156450882401
3.3422875979279545	-263.22521535799206
3.346099610071446	-264.1368799076661
3.3499116460311775	-265.0506411390116
3.3537237057257108	-265.9665014537776
3.3575357890739763	-266.88446325371314
3.3613478959952743	-267.8045289405671
3.36516002640927	-268.726700916088
3.3689721802359953	-269.65098158202454
3.372784357395844	-270.57737334012523
3.3765965578095676	-271.5058785921377
3.3804087813982786	-272.4364997398104
3.384221028083444	-273.36923918489117
3.3880332977868877	-274.30409932912755
3.391845590430783	-275.2410825742672
3.3956579059376546	-276.18019132205757
3.399470244230375	-277.12142797424576
3.403282605232166	-278.06479493257905
3.4070949888665876	-279.01029459880425
3.4109073950575484	-279.95792937466814
3.414719823729294	-280.90770166191743
3.418532274806411	-281.8596138622984
3.4223447482138196	-282.81366837755763
3.426157243876779	-283.76986760944106
3.429969761720878	-284.7282139596949
3.4337823016720392	-285.68870983006525
3.437594863656511	-286.65135762229727
3.4414074476008727	-287.6161597381369
3.4452200534320285	-288.58311857932955
3.4490326810772056	-289.55223654762045
3.452845330463954	-290.5235160447548
3.456658001520143	-291.4969594724776
3.4604706941739627	-292.4725692325338
3.464283408353918	-293.4503477266679
3.468096143988829	-294.430297356625
3.4719089010078297	-295.41242052414884
3.475721679340365	-296.39671963098414
3.479534478916191	-297.3831970788749
3.4833472996653714	-298.37185526956534
3.4871601415182756	-299.36269660479917
3.490973004405578	-300.3557234863202
3.4947858882582583	-301.35093831587204
3.498598793007595	-302.34834349519826
3.5024117185851664	-303.3479414260421
3.5062246649228523	-304.34973451014673
3.510037631952825	-305.3537251492554
3.5138506196075543	-306.3599157451108
3.517663627819803	-307.368308699456
3.5214766565226254	-308.3789064140335
3.525289705649366	-309.391711290586
3.5291027751336594	-310.406725730856
3.5329158649094237	-311.42395213658546
3.5367289749108655	-312.4433929095167
3.540542105072476	-313.46505045139185
3.5443552553290263	-314.4889271639527
3.5481684256155694	-315.5150254489411
3.5519816158674398	-316.54334770809874
3.555794826020247	-317.57389634316706
3.5596080560098775	-318.6066737558875
3.563421305772496	-319.64168234800155
3.567234575244535	-320.67892452124994
3.571047864362704	-321.718402677374
3.574861173063981	-322.7601192181146
3.5786745012856134	-323.80407654521247
3.582487848965115	-324.8502770604083
3.5863012160402694	-325.89872316544273
3.5901146024491215	-326.9494172620561
3.5939280081299816	-328.0023617519889
3.5977414330214206	-329.05755903698105
3.601554877062271	-330.1150115187728
3.6053683401916246	-331.17472159910403
3.6091818223488317	-332.23669167971457
3.612995323473498	-333.30092416234424
3.6168088435054844	-334.36742144873267
3.620622382384907	-335.4361859406192
3.624435940052133	-336.50722003974363
3.6282495164477813	-337.5805261478446
3.632063111512721	-338.6561066666616
3.6358767251880684	-339.7339639979337
3.639690357415189	-340.8141005433997
3.643504008135693	-341.89651870479855
3.6473176772914355	-342.98122088386896
3.6511313648245154	-344.06820948234946
3.6549450706772735	-345.15748690197853
3.6587587947922913	-346.24905554449475
3.662572537112389	-347.342917811636
3.666386297580627	-348.4390761051407
3.6702000761403015	-349.5375328267469
3.6740138727349443	-350.63829037819255
3.6778276873083238	-351.7413511612154
3.6816415198044394	-352.8467175775532
3.685455370167525	-353.95439202894363
3.6892692383420442	-355.06437691712443
3.6930831242726887	-356.1766746438326
3.6968970279043827	-357.2912876108057
3.700710949182275	-358.40821821978085
3.704524888051742	-359.52746887249526
3.708338844458384	-360.64904197068586
3.7121528183480272	-361.77293991608957
3.7159668096667193	-362.89916511044316
3.71978081836073	-364.02771995548375
3.7235948443765476	-365.15860685294723
3.7274088876608835	-366.2918282045705
3.731222948160664	-367.4273864120899
3.735037025823035	-368.5652838772417
3.7388511205953576	-369.70552300176223
3.7426652324252063	-370.84810618738743
3.7464793612603726	-371.9930358358535
3.7502935070488586	-373.14031434889625
3.754107669738878	-374.28994412825176
3.7579218492788558	-375.44192757565526
3.7617360456174262	-376.59626709284254
3.7655502587034317	-377.7529650815493
3.769364488485923	-378.91202394351086
3.7731787349141577	-380.0734460804626
3.776992997937597	-381.23723389413965
3.7808072775059056	-382.4033897862774
3.784621573568956	-383.57191615861086
3.788435886076817	-384.74281541287485
3.792250214979764	-385.9160899508042
3.796064560228268	-387.09174217413386
3.7998789217730025	-388.26977448459854
3.8036932995648387	-389.45018928393273
3.807507693554843	-390.6329889738709
3.8113221036942804	-391.8181759561477
3.81513652993461	-393.0057526324975
3.8189509722274844	-394.19572140465414
3.8227654305247505	-395.3880846743521
3.826579904778448	-396.58284484332535
3.8303943949408077	-397.78000431330787
3.8342089009642493	-398.9795654860336
3.8380234228013843	-400.18153076323625
3.84183796040501	-401.3859025466497
3.8456525137281146	-402.59268323800745
3.849467082723871	-403.80187523904334
3.853281667345636	-405.0134809514903
3.857096267546955	-406.2275027770822
3.860910883281555	-407.44394311755195
3.8647255145033466	-408.662804374633
3.8685401611664227	-409.88408895005847
3.872354823225056	-411.1077992455613
3.8761695006337016	-412.3339376628745
3.8799841933469934	-413.5625066037312
3.883798901319742	-414.79350846986375
3.8876136245069377	-416.0269456630051
3.8914283628637465	-417.2628205848878
3.8952431163455117	-418.50113563724454
3.8990578849077497	-419.74189322180763
3.902872668506153	-420.9850957403097
3.906687467096585	-422.2307455944828
3.910502280635086	-423.47884518605946
3.9143171090778615	-424.7293969167715
3.918131952381293	-425.9824031883511
3.9219468105019306	-427.2378664025304
3.925761683396493	-428.4957889610411
3.929576571021867	-429.75617326561525
3.9333914733351083	-431.01902171798446
3.9372063902934387	-432.28433671988046
3.941021321854244	-433.55212067303506
3.944836267975079	-434.82237597917975
3.9486512286136586	-436.0951050400456
3.9524662037278637	-437.37031025736434
3.9562811932757382	-438.6479940328671
3.9600961972154862	-439.9281587682853
3.963911215505473	-441.2108068653499
3.9677262481042272	-442.4959407257922
3.9715412949704336	-443.78356275134314
3.9753563560629375	-445.0736753437338
3.979171431340742	-446.3662809046947
3.9829865207630055	-447.6613818359568
3.986801624289048	-448.9589805392507
3.99061674187834	-450.2590794163074
3.99443187349051	-451.5616808688571
3.9982470190853396	-452.86678729863047
4.002062178622765	-454.174401107358
4.005877352062876	-455.4845246967703
4.00969253936591	-456.79716046859704
4.013507740492261	-458.11231082456874
4.017322955402473	-459.42997816641565
4.021138184057236	-460.75016489586767
4.024953426417393	-462.0728734146551
4.0287686824439355	-463.3981061245075
4.032583952098	-464.7258654271551
4.036399235340874	-466.05615372432754
4.040214532133989	-467.38897341775476
4.0440298424389205	-468.72432690916617
4.047845166217394	-470.06221660029144
4.051660503431276	-471.40264489286017
4.055475854042577	-472.7456141886018
4.05929121801345	-474.0911268892457
4.063106595306193	-475.4391853965212
4.066921985883242	-476.78979211215767
4.070737389707179	-478.1429494378845
4.074552806740721	-479.49865977543044
4.0783682369467265	-480.8569255265249
4.082183680288195	-482.2177490928965
4.0859991367282635	-483.58113287627464
4.089814606230205	-484.9470792783879
4.093630088757432	-486.3155907009652
4.0974455842734905	-487.68666954573524
4.101261092742067	-489.0603182144271
4.105076614126978	-490.4365391087689
4.1088921483921785	-491.8153346304893
4.112707695501754	-493.19670718131704
4.116523255419927	-494.5806591629804
4.120338828111051	-495.9671929772078
4.124154413539612	-497.3563110257276
4.127970011670226	-498.748015710268
4.13178562246764	-500.1423094325573
4.135601245896735	-501.53919459432376
4.139416881922517	-502.93867359729506
4.143232530510124	-504.3407488431995
4.14704819162482	-505.7454227337649
4.150863865232	-507.1526976707193
4.1546795512971855	-508.56257605579043
4.158495249786021	-509.9750602907061
4.162310960664282	-511.39015277719415
4.166126683897868	-512.8078559169822
4.169942419452801	-514.2281721117979
4.173758167295231	-515.6511037633683
4.177573927391432	-517.0766532734216
4.181389699707797	-518.5048230436848
4.1852054842108455	-519.9356154758856
4.189021280867217	-521.3690329717509
4.192837089643675	-522.8050779330084
4.196652910507102	-524.2437527613852
4.200468743424502	-525.6850598586082
4.204284588362999	-527.1290016264044
4.208100445289835	-528.5755804665014
4.211916314172372	-530.0247987806256
4.2157321949780915	-531.4766589705043
4.21954808767459	-532.9311634378641
4.223363992229584	-534.3883145844321
4.227179908610904	-535.848114811935
4.230995836786501	-537.3105665220996
4.2348117767244355	-538.7756721166522
4.238627728392888	-540.2434339973195
4.242443691760153	-541.7138545658282
4.246259666794638	-543.1869362239047
4.250075653464863	-544.6626813732755
4.2538916517394645	-546.141092415667
4.257707661587188	-547.6221717528055
4.261523682976893	-549.1059217864174
4.265339715877551	-550.5923449182287
4.2691557602582435	-552.0814435499655
4.2729718160881625	-553.5732200833542
4.2767878833366115	-555.0676769201207
4.280603961973002	-556.5648164619912
4.284420051966855	-558.0646411106914
4.288236153287801	-559.5671532679476
4.292052265905578	-561.0723553354854
4.295868389790031	-562.5802497150307
4.299684524911114	-564.0908388083092
4.3035006712388855	-565.6041250170465
4.307316828743511	-567.1201107429683
4.311132997395266	-568.6387983878006
4.3149491771645225	-570.1601903532686
4.318765368021764	-571.6842890410979
4.322581569937577	-573.2110968530142
4.326397782882652	-574.7406161907427
4.330214006827782	-576.2728494560088
4.334030241743861	-577.8077990505376
4.337846487601893	-579.3454673760547
4.341662744372976	-580.8858568342849
4.3454790120283135	-582.428969826954
4.3492952905392075	-583.9748087557869
4.353111579877066	-585.5233760225083
4.356927880013393	-587.0746740288439
4.3607441909197915	-588.6287051765182
4.364560512567967	-590.1854718672563
4.368376844929725	-591.744976502783
4.372193187976963	-593.3072214848232
4.376009541681684	-594.8722092151019
4.379825906015987	-596.4399420953433
4.383642280952063	-598.0104225272729
4.387458666462209	-599.583652912615
4.391275062518808	-601.1596356530939
4.395091469094348	-602.7383731504347
4.398907886161408	-604.3198678063615
4.402724313692662	-605.9041220225989
4.406540751660881	-607.4911382008715
4.41035720003893	-609.0809187429038
4.414173658799765	-610.6734660504198
4.41799012791644	-612.2687825251439
4.421806607362099	-613.8668705688008
4.42562309710998	-615.4677325831142
4.429439597133412	-617.0713709698083
4.433256107405819	-618.6777881306073
4.437072627900713	-620.2869864672356
4.440889158591699	-621.8989683814169
4.444705699452472	-623.513736274875
4.4485222504568185	-625.1312925493346
4.452338811578614	-626.7516396065192
4.456155382791825	-628.3747798481526
4.459971964070503	-630.0007156759583
4.463788555388796	-631.6294494916609
4.467605156720932	-633.2609836969835
4.471421768041234	-634.8953206936501
4.475238389324106	-636.5324628833843
4.479055020544047	-638.1724126679098
4.482871661675638	-639.8151724489504
4.486688312693546	-641.4607446282291
4.490504973572526	-643.1091316074695
4.494321644287422	-644.7603357883953
4.498138324813154	-646.4143595727298
4.5019550151247385	-648.0712053621965
4.5057717151972705	-649.7308755585185
4.509588425005928	-651.3933725634195
4.513405144525978	-653.0586987786226
4.51722187373277	-654.7268566058507
4.521038612601733	-656.3978484468273
4.524855361108381	-658.0716767032754
4.528672119228312	-659.7483437769184
4.532488886937205	-661.4278520694788
4.536305664210824	-663.1102039826802
4.540122451025009	-664.7954019182451
4.543939247355684	-666.483448277897
4.5477560531788574	-668.1743454633586
4.551572868470613	-669.8680958763524
4.555389693207116	-671.5647019186014
4.559206527364612	-673.2641659918287
4.56302337091943	-674.9664904977565
4.566840223847969	-676.671677838108
4.570657086126717	-678.3797304146058
4.574473957732235	-680.0906506289726
4.578290838641164	-681.804440882931
4.582107728830221	-683.5211035782032
4.585924628276202	-685.2406411165122
4.58974153695598	-686.96305589958
4.593558454846506	-688.6883503291294
4.597375381924807	-690.4165268068826
4.6011923181679855	-692.1475877345626
4.60500926355322	-693.881535513891
4.608826218057766	-695.618372546591
4.612643181658954	-697.3581012343838
4.616460154334188	-699.1007239789922
4.62027713606095	-700.8462431821381
4.624094126816791	-702.5946612455441
4.627911126579341	-704.3459805709322
4.631728135326305	-706.1002035600244
4.635545153035454	-707.8573326145428
4.639362179684641	-709.6173701362095
4.643179215251786	-711.3803185267467
4.646996259714885	-713.1461801878756
4.650813313052003	-714.9149575213189
4.65463037524128	-716.6866529287983
4.658447446260926	-718.4612688120353
4.662264526089224	-720.2388075727521
4.666081614704528	-722.0192716126703
4.669898712085259	-723.8026633335119
4.6737158182099146	-725.5889851369986
4.677532933057059	-727.3782394248518
4.681350056605326	-729.1704285987931
4.68516718883342	-730.9655550605446
4.688984329720117	-732.7636212118275
4.692801479244258	-734.5646294543635
4.696618637384756	-736.368582189874
4.700435804120592	-738.1754818200806
4.704252979430815	-739.9853307467051
4.708070163294539	-741.7981313714683
4.711887355690953	-743.6138860960917
4.715704556599306	-745.4325973222969
4.719521765998916	-747.2542674518053
4.723338983869174	-749.0788988863378
4.727156210189529	-750.906494027616
4.7309734449395	-752.737055277361
4.734790688098676	-754.570585037294
4.738607939646705	-756.4070857091366
4.7424251995633036	-758.2465596946091
4.746242467828257	-760.0890093954331
4.7500597444214065	-761.9344372133297
4.75387702932267	-763.7828455500196
4.757694322512021	-765.6342368072244
4.7615116239695014	-767.4886133866645
4.765328933675215	-769.3459776900611
4.769146251609331	-771.2063321191356
4.772963577752081	-773.0696790756082
4.77678091208376	-774.9360209611995
4.780598254584727	-776.8053601776312
4.784415605235402	-778.6776991266236
4.788232964016269	-780.5530402098974
4.792050330907875	-782.4313858291737
4.795867705890827	-784.3127383861729
4.799685088945794	-786.1971002826161
4.803502480053506	-788.0844739202234
4.807319879194758	-789.9748617007156
4.811137286350402	-791.8682660258135
4.8149547015013505	-793.7646892972373
4.81877212462858	-795.6641339167077
4.822589555713125	-797.5666022859455
4.8264069947360815	-799.4720968066707
4.830224441678602	-801.3806198806041
4.834041896521904	-803.2921739094662
4.8378593592472585	-805.2067612949771
4.841676829836	-807.1243844388569
4.845494308269518	-809.0450457428263
4.849311794529266	-810.9687476086058
4.85312928859675	-812.8954924379154
4.856946790453538	-814.8252826324753
4.860764300081256	-816.7581205940058
4.864581817461588	-818.6940087242273
4.86839934257627	-820.6329494248597
4.872216875407102	-822.5749450976231
4.876034415935939	-824.5199981442377
4.87985196414469	-826.4681109664235
4.883669520015326	-828.4192859659008
4.887487083529869	-830.3735255443893
4.891304654670401	-832.3308321036093
4.89512223341906	-834.2912080452811
4.898939819758034	-836.2546557711236
4.902757413669574	-838.2211776828574
4.906575015135982	-840.1907761822023
4.910392624139616	-842.1634536708782
4.91421024066289	-844.1392125506048
4.918027864688272	-846.1180552231024
4.921845496198282	-848.0999840900898
4.925663135175497	-850.0850015532877
4.92948078160255	-852.0731100144159
4.933298435462121	-854.0643118751934
4.9371160967369505	-856.0586095373397
4.94093376540983	-858.0560054025756
4.944751441463602	-860.0565018726197
4.948569124881165	-862.0601013491922
4.952386815645469	-864.0668062340121
4.956204513739518	-866.0766189287997
4.960022219146366	-868.0895418352743
4.96383993184912	-870.105577355155
4.9676576518309385	-872.1247278901612
4.971475379075034	-874.146995842013
4.97529311356467	-876.1723836124295
4.979110855283158	-878.2008936031298
4.982928604213866	-880.232528215834
4.9867463603402085	-882.2672898522608
4.990564123645653	-884.3051809141301
4.994381894113716	-886.3462038031606
4.998199671727967	-888.3903609210719
5.002017456472022	-890.4376546695833
5.005835248329552	-892.4880874504138
5.009653047284274	-894.5416616652827
5.013470853319954	-896.5983797159093
5.017288666420412	-898.6582440040127
5.021106486569513	-900.7212569313119
5.024924313751172	-902.7874208995268
5.028742147949354	-904.8567383103752
5.032559989148072	-906.9292115655768
5.036377837331387	-909.0048430668508
5.04019569248341	-911.0836352159159
5.0440135545882985	-913.1655904144914
5.0478314236302575	-915.250711064296
5.051649299593541	-917.3389995670489
5.055467182462455	-919.430458324469
5.059285072221341	-921.525089738275
5.0631029688546	-923.6228962101857
5.0669208723466745	-925.7238801419203
5.070738782682053	-927.8280439351971
5.074556699845274	-929.9353899917354
5.078374623820919	-932.0459207132541
5.082192554593619	-934.1596385014714
5.08601049214805	-936.276545758107
5.089828436468935	-938.3966448848784
5.093646387541038	-940.5199382835051
5.0974643453491755	-942.6464283557053
5.101282309878206	-944.7761175031981
5.1051002811130335	-946.9090081277019
5.108918259038607	-949.0451026309353
5.1127362436399215	-951.1844034146169
5.116554234902015	-953.3269128804653
5.120372232809974	-955.4726334301993
5.124190237348926	-957.621567465537
5.128008248504041	-959.7737173881972
5.131826266260537	-961.9290855998981
5.135644290603679	-964.087674502358
5.139462321518767	-966.2494864972962
5.14328035899115	-968.4145239864301
5.147098403006223	-970.5827893714787
5.150916453549418	-972.7542850541606
5.154734510606215	-974.9290134361935
5.158552574162135	-977.106976919296
5.16237064420274	-979.2881779051862
5.166188720713642	-981.4726187955827
5.1700068036804865	-983.6603019922035
5.173824893088968	-985.8512298967672
5.177642988924819	-988.0454049109918
5.1814610911738175	-990.2428294365964
5.185279199821779	-992.4435058752972
5.189097314854567	-994.647436628814
5.1929154362580805	-996.8546240988641
5.196733564018263	-999.0650706871663
5.2005516981211	-1001.2787787954381
5.2043698385526165	-1003.495750825398
5.208187985298879	-1005.7159891787638
5.212006138345996	-1007.9394962572537
5.215824297680114	-1010.1662744625862
5.219642463287421	-1012.3963261964784
5.223460635154149	-1014.6296538606485
5.227278813266565	-1016.8662598568148
5.2310969976109805	-1019.1061465866951
5.234915188173743	-1021.3493164520072
5.238733384941244	-1023.5957718544694
5.242551587899911	-1025.845515195799
5.246369797036212	-1028.0985488777146
5.250188012336657	-1030.3548753019331
5.254006233787791	-1032.6144968701733
5.2578244613762015	-1034.8774159841523
5.261642695088515	-1037.143635045588
5.265460934911392	-1039.4131564561985
5.269279180831538	-1041.6859826177015
5.273097432835695	-1043.9621159318147
5.276915690910641	-1046.241558800256
5.280733955043194	-1048.5243136247423
5.284552225220212	-1050.8103828069916
5.288370501428586	-1053.0997687487222
5.29218878365525	-1055.3924738516512
5.296007071887175	-1057.688500517496
5.299825366111365	-1059.9878511479747
5.303643666314867	-1062.2905281448052
5.307461972484763	-1064.5965339097038
5.311280284608171	-1066.9058708443897
5.315098602672247	-1069.2185413505792
5.318916926664187	-1071.53454782999
5.3227352565712165	-1073.8538926843398
5.3265535923806056	-1076.1765783153462
5.330371934079656	-1078.5026071247262
5.334190281655708	-1080.8319815141979
5.338008635096137	-1083.1647038854783
5.341826994388354	-1085.500776640285
5.345645359519807	-1087.840202180335
5.34946373047798	-1090.182982907346
5.353282107250394	-1092.529121223035
5.3571004898246	-1094.87861952912
5.360918878188193	-1097.2314802273177
5.364737272328798	-1099.5877057193456
5.368555672234073	-1101.9472984069214
5.372374077891717	-1104.310260691762
5.376192489289461	-1106.6765949755843
5.3800109064150705	-1109.0463036601059
5.383829329256346	-1111.4193891470443
5.3876477578011235	-1113.7958538381158
5.391466192037273	-1116.1757001350386
5.3952846319526975	-1118.5589304395291
5.3991030775353375	-1120.945547153305
5.402921528773163	-1123.3355526780833
5.406739985654183	-1125.7289494155812
5.410558448166439	-1128.125739767515
5.414376916298002	-1130.5259261356027
5.41819539003698	-1132.9295109215607
5.422013869371518	-1135.3364965271064
5.4258323542897875	-1137.7468853539572
5.4296508447799985	-1140.1606798038297
5.433469340830391	-1142.5778822784407
5.437287842429241	-1144.9984951795082
5.441106349564853	-1147.4225209087474
5.44492486222557	-1149.8499618678766
5.448743380399763	-1152.2808204586122
5.452561904075839	-1154.715099082671
5.456380433242235	-1157.1528001417705
5.460198967887421	-1159.5939260376272
5.464017507999901	-1162.038479171958
5.467836053568207	-1164.4864619464804
5.471654604580908	-1166.9378767629098
5.475473161026602	-1169.3927260229639
5.479291722893919	-1171.8510121283598
5.483110290171521	-1174.312737480814
5.486928862848103	-1176.7779044820425
5.490747440912387	-1179.2465155337632
5.494566024353134	-1181.7185730376927
5.498384613159129	-1184.194079395547
5.5022032073191935	-1186.6730370090438
5.506021806822172	-1189.1554482798986
5.509840411656952	-1191.641315609829
5.51365902181244	-1194.130641400551
5.517477637277581	-1196.623428053782
5.5212962580413505	-1199.1196779712382
5.525114884092746	-1201.6193935546362
5.528933515420805	-1204.1225772056928
5.532752152014593	-1206.629231326125
5.536570793863204	-1209.1393583176482
5.540389440955759	-1211.6529605819796
5.544208093281416	-1214.170040520836
5.54802675082936	-1216.6906005359335
5.551845413588802	-1219.214643028989
5.555664081548989	-1221.7421704017188
5.559482754699191	-1224.2731850558391
5.563301433028715	-1226.8076893930674
5.56712011652689	-1229.345685815119
5.57093880518308	-1231.8871767237106
5.574757498986672	-1234.4321645205594
5.578576197927091	-1236.9806516073804
5.582394901993782	-1239.532640385891
5.586213611176224	-1242.0881332578078
5.590032325463923	-1244.6471326248463
5.593851044846414	-1247.2096408887237
5.597669769313261	-1249.7756604511565
5.601488498854055	-1252.3451937138595
5.6053072334584195	-1254.9182430785506
5.609125973115999	-1257.4948109469456
5.612944717816475	-1260.0748997207604
5.616763467549548	-1262.6585118017115
5.620582222304955	-1265.2456495915155
5.624400982072455	-1267.8363154918882
5.628219746841838	-1270.4305119045466
5.632038516602918	-1273.0282412312056
5.635857291345542	-1275.6295058735825
5.639676071059581	-1278.234308233393
5.643494855734932	-1280.8426507123534
5.647313645361525	-1283.45453571218
5.65113243992931	-1286.0699656345885
5.65495123942827	-1288.6889428812958
5.6587700438484125	-1291.3114698540176
5.662588853179772	-1293.9375489544695
5.66640766741241	-1296.5671825843685
5.670226486536416	-1299.2003731454304
5.674045310541905	-1301.8371230393707
5.677864139419018	-1304.4774346679058
5.681682973157924	-1307.1213104327521
5.685501811748817	-1309.7687527356254
5.68932065518192	-1312.4197639782417
5.69313950344748	-1315.0743465623173
5.696958356535768	-1317.7325028895673
5.700777214437086	-1320.3942353617088
5.704596077141759	-1323.0595463804566
5.70841494464014	-1325.7284383475273
5.712233816922602	-1328.400913664637
5.716052693979553	-1331.0769747335019
5.71987157580142	-1333.7566239558369
5.7236904623786575	-1336.439863733359
5.727509353701743	-1339.1266964677832
5.7313282497611855	-1341.8171245608257
5.735147150547512	-1344.5111504142026
5.7389660560512805	-1347.2087764296289
5.74278496626307	-1349.9100050088214
5.746603881173487	-1352.6148385534955
5.750422800773165	-1355.3232794653672
5.754241725052757	-1358.035330146153
5.758060654002943	-1360.750992997567
5.76187958761443	-1363.4702704213257
5.765698525877946	-1366.1931648191455
5.769517468784247	-1368.9196785927413
5.7733364163241125	-1371.6498141438296
5.777155368488344	-1374.3835738741252
5.7809743252677706	-1377.120960185345
5.784793286653244	-1379.861975479204
5.78861225263564	-1382.6066221574179
5.792431223205858	-1385.3549026217022
5.796250198354823	-1388.1068192737728
5.800069178073483	-1390.8623745153454
5.803888162352809	-1393.6215707481356
5.8077071511837985	-1396.384410373859
5.81152614455747	-1399.1508957942317
5.815345142464865	-1401.9210294109682
5.8191641448970515	-1404.6948136257854
5.822983151845119	-1407.4722508403975
5.826802163300181	-1410.2533434565214
5.830621179253375	-1413.038093875872
5.834440199695859	-1415.8265045001644
5.838259224618815	-1418.6185777311146
5.842078254013453	-1421.4143159704388
5.845897287870998	-1424.2137216198516
5.849716326182706	-1427.0167970810692
5.8535353689398475	-1429.8235447558063
5.857354416133723	-1432.6339670457787
5.861173467755651	-1435.448066352702
5.864992523796976	-1438.2658450782917
5.868811584249062	-1441.0873056242626
5.8726306491032965	-1443.912450392331
5.876449718351092	-1446.7412817842123
5.88026879198388	-1449.573802201621
5.884087869993114	-1452.4100140462742
5.887906952370274	-1455.2499197198852
5.891726039106856	-1458.093521624171
5.8955451301943835	-1460.9408221608455
5.8993642256243985	-1463.7918237316255
5.903183325388466	-1466.6465287382257
5.907002429478174	-1469.5049395823612
5.9108215378851305	-1472.3670586657477
5.914640650600965	-1475.232888390101
5.918459767617332	-1478.102431157135
5.922278888925902	-1480.9756893685665
5.926098014518371	-1483.8526654261093
5.929917144386456	-1486.7333617314798
5.933736278521896	-1489.617780686393
5.937555416916447	-1492.505924692564
5.94137455956189	-1495.397796151708
5.945193706450027	-1498.2933974655411
5.949012857572683	-1501.192731035777
5.9528320129216965	-1504.0957992641318
5.956651172488935	-1507.0026045523202
5.960470336266282	-1509.9131493020584
5.964289504245645	-1512.82743591506
5.96810867641895	-1515.7454667930417
5.971927852778144	-1518.667244337718
5.975747033315197	-1521.5927709508044
5.979566218022096	-1524.5220490340155
5.983385406890847	-1527.4550809890663
5.987204599913484	-1530.3918692176726
5.9910237970820575	-1533.3324161215487
5.994842998388632	-1536.2767241024103
5.998662203825302	-1539.224795561972
6.002481413384177	-1542.17663290195
6.006300627057386	-1545.132238524058
6.010119844837082	-1548.0916148300123
6.013939066715434	-1551.0547642215263
6.017758292684631	-1554.0216891003165
6.021577522736884	-1556.992391868097
6.025396756864424	-1559.9668749265834
6.0292159950595	-1562.9451406774906
6.0330352373143805	-1565.9271915225331
6.036854483621355	-1568.913029863427
6.040673733972731	-1571.9026581018863
6.0444929883608385	-1574.8960786396262
6.048312246778021	-1577.8932938783616
6.0521315092166486	-1580.8943062198077
6.055950775669103	-1583.899118065679
6.0597700461277935	-1586.9077318176905
6.063589320585142	-1589.9201498775576
6.067408599033591	-1592.9363746469949
6.071227881465605	-1595.9564085277177
6.075047167873662	-1598.98025392144
6.078866458250264	-1602.007913229877
6.082685752587931	-1605.0393888547437
6.086505050879198	-1608.0746831977553
6.090324353116622	-1611.1137986606261
6.09414365929278	-1614.1567376450707
6.097962969400265	-1617.2035025528053
6.101782283431689	-1620.254095785543
6.105601601379684	-1623.3085197450005
6.109420923236895	-1626.3667768328908
6.113240248995993	-1629.4288694509296
6.117059578649665	-1632.4948000008312
6.120878912190612	-1635.5645708843106
6.124698249611559	-1638.6381845030833
6.128517590905247	-1641.7156432588636
6.13233693606443	-1644.7969495533648
6.136156285081889	-1647.8821057883035
6.139975637950418	-1650.9711143653933
6.143794994662828	-1654.06397768635
6.1476143552119495	-1657.1606981528873
6.151433719590634	-1660.2612781667208
6.1552530877917455	-1663.365720129565
6.159072459808165	-1666.474026443133
6.162891835632798	-1669.5861995091418
6.1667112152585615	-1672.7022417293047
6.1705305986783925	-1675.8221555053374
6.174349985885244	-1678.9459432389522
6.17816937687209	-1682.0736073318665
6.181988771631915	-1685.2051501857932
6.185808170157729	-1688.3405742024488
6.189627572442556	-1691.4798817835456
6.193446978479432	-1694.6230753307993
6.197266388261419	-1697.7701572459252
6.2010858017815895	-1700.9211299306355
6.204905219033038	-1704.0759957866478
6.208724640008872	-1707.2347572156743
6.212544064702217	-1710.3974166194314
6.216363493106216	-1713.563976399633
6.2201829252140275	-1716.7344389579923
6.224002361018832	-1719.9088066962256
6.227821800513817	-1723.0870820160462
6.231641243692198	-1726.2692673191702
6.235460690547198	-1729.4553650073096
6.239280141072062	-1732.6453774821819
6.243099595260049	-1735.839307145499
6.2469190531044365	-1739.0371563989777
6.250738514598515	-1742.238927644331
6.254557979735593	-1745.4446232832724
6.258377448508999	-1748.654245717519
6.2621969209120705	-1751.8677973487827
6.266016396938171	-1755.0852805787802
6.26983587658067	-1758.3066978092231
6.2736553598329605	-1761.5320514418295
6.277474846688447	-1764.76134387831
6.281294337140553	-1767.9945775203823
6.285113831182716	-1771.2317547697596
6.28893332880839	-1774.4728780281544
6.292752830011048	-1777.7179496972842
6.296572334784171	-1780.9669721788605
6.300391843121266	-1784.2199478746008
6.304211355015849	-1787.476879186216
6.308030870461454	-1790.7377685154236
6.311850389451629	-1794.0026182639365
6.315669911979937	-1797.271430833468
6.319489438039961	-1800.5442086257347
6.323308967625295	-1803.8209540424482
6.327128500729552	-1807.1016694853263
6.330948037346356	-1810.3863573560795
6.334767577469352	-1813.6750200564252
6.3385871210921945	-1816.9676599880756
6.342406668208559	-1820.264279552747
6.346226218812133	-1823.564881152152
6.350045772896615	-1826.8694671880044
6.353865330455729	-1830.1780400620207
6.3576848914832045	-1833.490602175913
6.361504455972792	-1836.807155931397
6.365324023918254	-1840.1277037301854
6.3691435953133695	-1843.452247973995
6.372963170151931	-1846.7807910645365
6.376782748427748	-1850.1133354035276
6.380602330134641	-1853.4498833926807
6.384421915266449	-1856.7904374337093
6.388241503817026	-1860.1349999283298
6.392061095780238	-1863.4835732782535
6.395880691149967	-1866.8361598851975
6.399700289920107	-1870.192762150874
6.4035198920845735	-1873.5533824769982
6.407339497637292	-1876.9180232652843
6.411159106572196	-1880.286686917445
6.414978718883248	-1883.659375835196
6.4187983345644115	-1887.0360924202505
6.422617953609673	-1890.4168390743234
6.4264375760130275	-1893.8016181991277
6.430257201768489	-1897.190432196379
6.434076830870082	-1900.58328346779
6.43789646331185	-1903.9801744150766
6.441716099087843	-1907.3811074399512
6.44553573819213	-1910.7860849441274
6.4493553806187975	-1914.1951093293217
6.453175026361938	-1917.6081829972456
6.456994675415664	-1921.025308349615
6.4608143277740995	-1924.4464877881421
6.4646339834313835	-1927.871723714544
6.468453642381666	-1931.3010185305313
6.472273304619117	-1934.7343746378203
6.476092970137913	-1938.1717944381248
6.479912638932247	-1941.613280333157
6.48373231099633	-1945.0588347246337
6.4875519863243785	-1948.5084600142657
6.491371664910631	-1951.9621586037695
6.4951913467493325	-1955.4199328948582
6.499011031834747	-1958.8817852892466
6.502830720161148	-1962.3477181886478
6.506650411722823	-1965.817733994775
6.510470106514077	-1969.2918351093442
6.514289804529222	-1972.7700239340672
6.518109505762589	-1976.2523028706596
6.521929210208519	-1979.7386743208347
6.5257489178613675	-1983.2291406863064
6.529568628715502	-1986.723704368788
6.533388342765306	-1990.2223677699958
6.537208060005174	-1993.7251332916417
6.54102778042951	-1997.232003335438
6.54484750403274	-2000.7429803031027
6.548667230809293	-2004.2580665963462
6.552486960753621	-2007.777264616885
6.556306693860179	-2011.3005767664301
6.560126430123445	-2014.8280054466986
6.5639461695379	-2018.3595530594025
6.567765912098043	-2021.8952220062547
6.571585657798389	-2025.4350146889717
6.575405406633457	-2028.978933509265
6.579225158597787	-2032.5269808688497
6.583044913685926	-2036.079159169439
6.586864671892439	-2039.6354708127476
6.590684433211898	-2043.1959182004878
6.5945041976388925	-2046.7605037343756
6.598323965168021	-2050.3292298161227
6.602143735793895	-2053.902098847444
6.605963509511142	-2057.4791132300534
6.609783286314396	-2061.060275365663
6.6136030661983085	-2064.64558765599
6.617422849157539	-2068.2350525027446
6.621242635186768	-2071.828672307643
6.6250624242806735	-2075.426449472397
6.628882216433961	-2079.028386398723
6.632702011641339	-2082.6344854883328
6.63652180989753	-2086.2447491429393
6.640341611197271	-2089.859179764259
6.644161415535306	-2093.4777797540023
6.6479812229064	-2097.1005515138863
6.651801033305319	-2100.7274974456227
6.655620846726853	-2104.3586199509255
6.6594406631657925	-2107.9939214315095
6.663260482616944	-2111.6334042890862
6.667080305075132	-2115.277070925371
6.670900130535183	-2118.9249237420763
6.674719958991944	-2122.5769651409178
6.678539790440268	-2126.233197523608
6.682359624875022	-2129.893623291861
6.686179462291082	-2133.5582448473883
6.689999302683343	-2137.2270645919066
6.693819146046703	-2140.900084927129
6.697638992376076	-2144.5773082547666
6.70145884166639	-2148.2587369765365
6.705278693912576	-2151.944373494149
6.709098549109587	-2155.6342202093215
6.712918407252381	-2159.3282795237637
6.71673826833593	-2163.0265538391927
6.720558132355214	-2166.7290455573193
6.724377999305231	-2170.4357570798593
6.728197869180983	-2174.1466908085254
6.732017741977486	-2177.8618491450297
6.735837617689772	-2181.5812344910883
6.739657496312877	-2185.304849248412
6.743477377841852	-2189.032695818719
6.7472972622717595	-2192.7647766037176
6.751117149597674	-2196.501094005125
6.754937039814676	-2200.2416504246535
6.758756932917862	-2203.986448264015
6.762576828902339	-2207.7354899249267
6.766396727763223	-2211.4887778090983
6.7702166294956445	-2215.2463143182463
6.774036534094741	-2219.0081018540827
6.777856441555664	-2222.7741428183217
6.781676351873573	-2226.544439612676
6.785496265043642	-2230.31899463886
6.7893161810610545	-2234.0978102985873
6.793136099921001	-2237.8808889935694
6.796956021618689	-2241.6682331255233
6.800775946149332	-2245.459845096159
6.804595873508158	-2249.2557273071925
6.808415803690403	-2253.055882160336
6.812235736691317	-2256.860312057304
6.816055672506153	-2260.6690193998083
6.819875611130185	-2264.4820065895638
6.82369555255869	-2268.299276028284
6.827515496786958	-2272.1208301176807
6.83133544381029	-2275.9466712594694
6.835155393623996	-2279.776801855361
6.8389753462234015	-2283.6112243070734
6.842795301603831	-2287.4499410163144
6.846615259760636	-2291.2929543848027
6.850435220689163	-2295.140266814248
6.854255184384777	-2298.991880706365
6.858075150842852	-2302.847798462867
6.8618951200587714	-2306.7080224854676
6.86571509202793	-2310.5725551758806
6.869535066745729	-2314.441398935818
6.873355044207589	-2318.3145561669958
6.8771750244089285	-2322.192029271124
6.880995007345186	-2326.073820649918
6.884814993011807	-2329.959932705092
6.888634981404245	-2333.8503678383563
6.892454972517966	-2337.7451284514273
6.896274966348442	-2341.644216946017
6.900094962891165	-2345.5476357238394
6.903914962141624	-2349.4553871866065
6.90773496409533	-2353.367473736034
6.911554968747793	-2357.283897773832
6.915374976094542	-2361.2046617017177
6.91919498613111	-2365.1297679214017
6.923014998853042	-2369.0592188345972
6.926835014255894	-2372.993016843019
6.9306550323352285	-2376.9311643483784
6.934475053086621	-2380.8736637523925
6.938295076505655	-2384.82051745677
6.942115102587927	-2388.771727863228
6.945935131329038	-2392.7272973734775
6.9497551627246	-2396.6872283892317
6.953575196770237	-2400.651523312206
6.957395233461583	-2404.6201845441105
6.961215272794279	-2408.5932144866615
6.965035314763974	-2412.5706155415705
6.9688553593663345	-2416.552390110552
6.972675406597026	-2420.5385405953175
6.976495456451731	-2424.5290693975826
6.98031550892614	-2428.5239789190596
6.984135564015948	-2432.523271561459
6.987955621716869	-2436.526949726498
6.991775682024616	-2440.535015815888
6.995595744934919	-2444.547472231343
6.999415810443513	-2448.5643213745752
7.003235878546145	-2452.585565647299
7.007055949238569	-2456.611207451226
7.01087602251655	-2460.6412491880715
7.014696098375862	-2464.6756932595476
7.018516176812285	-2468.7145420673655
7.022336257821616	-2472.7577980132432
7.02615634139965	-2476.805463498888
7.029976427542203	-2480.857540926019
7.03379651624509	-2484.9140326963447
7.037616607504142	-2488.9749412115807
7.041436701315196	-2493.0402688734407
7.045256797674097	-2497.110018083635
7.049076896576703	-2501.1841912438795
7.052896998018874	-2505.2627907558854
7.05671710199649	-2509.345819021368
7.060537208505428	-2513.4332784420385
7.064357317541583	-2517.5251714196115
7.068177429100851	-2521.621500355798
7.071997543179146	-2525.7222676523147
7.075817659772383	-2529.827475710872
7.079637778876487	-2533.9371269331823
7.083457900487398	-2538.0512237209623
7.087278024601056	-2542.16976847592
7.0910981512134175	-2546.2927635997744
7.09491828032044	-2550.420211494233
7.098738411918098	-2554.5521145610137
7.102558546002369	-2558.688475201826
7.1063786825692405	-2562.8292958183856
7.11019882161471	-2566.974578812404
7.1140189631347805	-2571.1243265855937
7.117839107125468	-2575.27854153967
7.121659253582791	-2579.4372260763434
7.125479402502784	-2583.60038259733
7.129299553881483	-2587.7680135043397
7.13311970771494	-2591.940121199088
7.136939863999206	-2596.1167080832874
7.1407600227303485	-2600.297776558649
7.1445801839044405	-2604.483329026889
7.148400347517561	-2608.6733678897176
7.152220513565802	-2612.86789554885
7.156040682045261	-2617.0669144059975
7.159860852952044	-2621.2704268628754
7.163681026282266	-2625.4784353211926
7.167501202032051	-2629.6909421826676
7.171321380197529	-2633.90794984901
7.17514156077484	-2638.129460721932
7.178961743760132	-2642.35547720315
7.182781929149559	-2646.5860016943734
7.186602116939288	-2650.821036597318
7.190422307125489	-2655.060584313695
7.1942424997043455	-2659.304647245219
7.198062694672041	-2663.553227793601
7.201882892024777	-2667.806328360555
7.205703091758757	-2672.063951347796
7.20952329387019	-2676.326099157032
7.213343498355302	-2680.5927741899814
7.217163705210318	-2684.863978848353
7.220983914431478	-2689.139715533863
7.224804126015023	-2693.4199866482218
7.228624339957209	-2697.7047945931445
7.232444556254294	-2701.994141770343
7.236264774902547	-2706.288030581529
7.240084995898246	-2710.5864634284176
7.243905219237672	-2714.8894427127193
7.247725444917122	-2719.1969708361507
7.25154567293289	-2723.5090502004205
7.255365903281289	-2727.8256832072457
7.259186135958632	-2732.1468722583354
7.26300637096124	-2736.4726197554055
7.266826608285448	-2740.8029281001686
7.2706468479275905	-2745.1377996943347
7.274467089884019	-2749.4772369396205
7.278287334151082	-2753.821242237735
7.282107580725145	-2758.169817990396
7.285927829602576	-2762.5229665993124
7.289748080779751	-2766.880690466199
7.293568334253056	-2771.2429919927663
7.297388590018883	-2775.609873580731
7.301208848073631	-2779.981337631804
7.305029108413706	-2784.357386547696
7.3088493710355245	-2788.738022730124
7.312669635935507	-2793.123248580797
7.316489903110086	-2797.5130665014317
7.320310172555694	-2801.9074788937373
7.324130444268781	-2806.3064881594296
7.327950718245796	-2810.7100967002207
7.331770994483197	-2815.1183069178205
7.335591272977454	-2819.531121213947
7.339411553725037	-2823.9485419903076
7.343231836722432	-2828.3705716486193
7.347052121966123	-2832.797212590593
7.35087240945261	-2837.2284672179435
7.354692699178395	-2841.6643379323805
7.358512991139989	-2846.1048271356194
7.36233328533391	-2850.549937229372
7.36615358175668	-2854.99967061535
7.369973880404834	-2859.454029695269
7.373794181274913	-2863.913016870839
7.377614484363461	-2868.3766345437753
7.38143478966703	-2872.8448851157877
7.385255097182186	-2877.317770988592
7.389075406905493	-2881.795294563899
7.392895718833529	-2886.2774582434236
7.396716032962875	-2890.7642644288767
7.400536349290118	-2895.25571552197
7.404356667811858	-2899.7518139244194
7.408176988524696	-2904.2525620379342
7.411997311425243	-2908.757962264232
7.415817636510115	-2913.26801700502
7.41963796377594	-2917.782728662015
7.423458293219347	-2922.302099636929
7.427278624836972	-2926.8261323314728
7.431098958625463	-2931.3548291473608
7.434919294581471	-2935.888192486305
7.4387396327016555	-2940.4262247500196
7.4425599729826795	-2944.9689283402154
7.44638031542122	-2949.516305658607
7.4502006600139525	-2954.068359106905
7.454021006757566	-2958.6250910868243
7.457841355648754	-2963.1865040000766
7.461661706684212	-2967.7526002483737
7.46548205986065	-2972.32338223343
7.469302415174781	-2976.8988523569565
7.4731227726233245	-2981.4790130206684
7.476943132203006	-2986.063866626276
7.480763493910562	-2990.6534155754944
7.484583857742728	-2995.247662270032
7.488404223696255	-2999.846609111606
7.492224591767896	-3004.4502585019286
7.496044961954408	-3009.0586128427094
7.49986533425256	-3013.6716745356644
7.503685708659124	-3018.289445982503
7.50750608517088	-3022.9119295849423
7.511326463784615	-3027.5391277446897
7.515146844497122	-3032.1710428634624
7.518967227305199	-3036.8076773429716
7.522787612205652	-3041.449033584928
7.526607999195296	-3046.095113991048
7.530428388270944	-3050.7459209630397
7.5342487794294275	-3055.4014569026203
7.5380691726675755	-3060.0617242114986
7.541889567982227	-3064.726725291391
7.545709965370223	-3069.396462544006
7.549530364828421	-3074.070938371061
7.553350766353673	-3078.7501551742653
7.557171169942845	-3083.434115355331
7.560991575592805	-3088.122821315973
7.56481198330043	-3092.816275457902
7.568632393062606	-3097.514480182833
7.572452804876216	-3102.217437892476
7.5762732187381605	-3106.9251509885457
7.580093634645337	-3111.637621872753
7.583914052594657	-3116.3548529468126
7.5877344725830325	-3121.076846612436
7.591554894607381	-3125.8036052713337
7.595375318664635	-3130.535131325222
7.599195744751719	-3135.271427175811
7.60301617286558	-3140.0124952248157
7.606836603003157	-3144.7583378739437
7.610657035161404	-3149.5089575249144
7.614477469337278	-3154.264356579436
7.61829790552774	-3159.0245374392202
7.6221183437297615	-3163.789502505984
7.625938783940316	-3168.559254181435
7.629759226156388	-3173.333794867291
7.633579670374959	-3178.113126965259
7.63740011659303	-3182.8972528770564
7.641220564807596	-3187.6861750043918
7.645041015015664	-3192.4798957489816
7.648861467214246	-3197.2784175125366
[truncated: 8,000 more rows]
