# Supplementary material for: Critical Phenomena of Charged AdS Black Holes in Rastall Gravity
Source: Hindawi journal article supplement (doi:10.1155/2020/4065254), 2020-01-24
Supplement: f1 [file 4065254.f1.zip › Fig3(b)-GT5.dat]

2716.6581951924054	-1.6683929562073667
213.31994610335755	-0.37270085276065
43.488454231180924	-0.07536411890811688
13.100072575766063	0.03466713266423919
4.921261338822788	0.08472202834670901
2.1685368191193675	0.11017456479081325
1.1069710023440393	0.12397294388429003
0.6612750734264665	0.1317164214123442
0.46474325082874657	0.13611301946543566
0.37654796344232366	0.1385810770076975
0.3377412351120892	0.13990830985579006
0.32204276050263125	0.14055172285471854
0.3171956202241235	0.14078511219270462
0.3173116824648803	0.14077623324112648
0.31952210187202423	0.14062925151889952
0.3224350631587982	0.14040908519550793
0.32539627069992116	0.14015585689161264
0.3281229503362968	0.1398937285677129
0.3305184049178336	0.1396364384749021
0.33257660242685394	0.1393908452713363
0.3343327793043923	0.13915923750929948
0.33583800125537366	0.1389408614007862
0.33714634973306135	0.13873294411885445
0.33830879498629807	0.13853138609120075
0.3393705953188651	0.13833123291992416
0.34037052383680705	0.13812699871829187
0.3413410057408266	0.13791288817225858
0.34230867277353133	0.13768294893250194
0.3432950728976704	0.13743117571304836
0.3443174002617838	0.13715158071247807
0.34538918001870084	0.13683824044838588
0.34652088021746463	0.13648532603074023
0.3477204429249208	0.13608712180164684
0.34899373682505147	0.13563803581888229
0.35034493821088547	0.13513260464957597
0.35177684901330797	0.13456549423008754
0.35329116070321853	0.13393149804558668
0.3548886723411543	0.13322553352514005
0.35656947016356094	0.13244263729217076
0.35833307511946966	0.131577959726224
0.3601785638243852	0.13062675915932473
0.36210466753528836	0.12958439593431015
0.36410985299255466	0.1284463264830707
0.366192388323612	0.12720809753232837
0.3683503966524716	0.1258653405081764
0.370581899598084	0.12441376618432665
0.37288485246088415	0.12284915960013282
0.3752571725793322	0.1211673752609925
0.3776967620761698	0.11936433262422957
0.38020152599825136	0.11743601186695993
0.3827693866762282	0.11537844992796957
0.385398294984365	0.11318773681270809
0.38808623906075534	0.11086001214869796
0.39083125094953475	0.10839146197767292
0.3936314115455393	0.10577831577034932
0.39648485415507817	0.10301684364973404
0.399389766931495	0.10010335380915872
0.4023443943988787	0.09703419011170125
0.4053470382399037	0.09380572985825548
0.40839605749293884	0.09041438171217649
0.41148986827807416	0.08685658376913682
0.41462694315065945	0.08312880176154415
0.41780581016351775	0.07922752738758307
0.4210250517045795	0.07514927675563332
0.4242833031647381	0.07089058893547975
0.4275792514808334	0.06644802460836227
0.430911633590469	0.06181816480850513
0.43427923482857317	0.05699760974932844
0.43768088728997895	0.05198297772806029
0.44111546817763087	0.04677090410295778
0.44458189815215743	0.04135804033779142
0.4480791396953475	0.03574105310866606
0.4516061954974195	0.02991662346863405
0.4551621068757834	0.0238814460659124
0.45874595223119286	0.01763222841184149
0.4623568455456952	0.011165690195024155
0.46599393492556884	0.0044785626383601895
0.46965640119143715	-0.002432412104054177
0.473343456516932	-0.009570481512958307
0.4770543431166192	-0.016938883235472713
0.48078833198336124	-0.024540845584542684
0.4845447216748672	-0.032379588008482674
0.48832283714883484	-0.04045832153265863
0.49212202864582755	-0.04878024917519011
0.495941670618816	-0.0573485663384163
0.4997811607081635	-0.06616646117773736
0.5036399187607119	-0.07523711494932542
0.5075173858915494	-0.08456370233808916
0.5114130235869832	-0.09414939176717621
0.5153263128472101	-0.10399734569020129
0.5192567533671669	-0.11411072086730818
0.5232038627540413	-0.12449266862608797
0.5271671757799412	-0.1351463351083097
0.531146243668242	-0.1460748615033469
0.535140633412162	-0.1572813842691257
0.539149927124152	-0.16876903534136167
0.5431737214147285	-0.1805409423317967
0.5472116267994201	-0.19260022871610621
0.5512632671325427	-0.20495001401209015
0.5553282790665695	-0.2175934139487323
0.5594063115359048	-0.2305335406266632
0.563497025263922	-0.24377350267053244
0.5676000922921709	-0.2573164053737603
0.5717151955307084	-0.27116535083610777
0.5758420283285521	-0.2853234380944769
0.5799802940632997	-0.29979376324732676
0.5841297057490021	-0.31457941957306235
0.5882899856614225	-0.32968349764273697
0.5924608649798488	-0.3451090854273805
0.5966420834446722	-0.36085926840025295
0.6008333890299781	-0.37693712963429704
0.6050345376304372	-0.3933457498950549
0.6092452927618108	-0.4100882077292885
0.6134654252744287	-0.4271675795495372
0.6176947130790175	-0.4445869397148266
0.6219329408843017	-0.46234936060773085
0.6261798999458146	-0.4804579127079797
0.6304353878253941	-0.49891566466279247
0.634699208160859	-0.5177256833541004
0.6389711704453909	-0.5368910339628256
0.6432510898161643	-0.5564147800303585
0.6475387868517982	-0.5762999835173822
0.6518340873782154	-0.5965497048601689
0.6561368222825232	-0.6171670030244814
0.6604468273345451	-0.6381549355571912
0.6647639430156499	-0.659516558635734
0.6690880143545485	-0.681254927115497
0.6734188907697339	-0.7033730945752485
0.6777564259182727	-0.7258741133606952
0.682100477550649	-0.7487610346262639
0.6864509073713989	-0.7720369083751856
0.6908075809052685	-0.7957047834979676
0.6951703673686531	-0.8197677078093237
0.6995391395460803	-0.8442287280836374
0.7039137736715146	-0.8690908900890237
0.7082941493142719	-0.89435723862006
0.7126801492693404	-0.9200308175292338
0.7170716594519155	-0.9461146697571803
0.7214685687959667	-0.9726118373617536
0.7258707691566599	-0.9995253615459885
0.7302781552164732	-1.0268582826850003
0.7346906243948407	-1.05461364035187
0.7391080767611831	-1.0827944733425614
0.7435304149511708	-1.1114038196999072
0.7479575440860935	-1.1404447167367093
0.752389371695196	-1.1699202010579905
0.7568258076408635	-1.199833308582431
0.7612667640465323	-1.230187074563028
0.7657121552272158	-1.2609845336070082
0.770161897622538	-1.292228719695028
0.774615909732168	-1.3239226661996866
0.7790741120535629	-1.3560694059033844
0.7835364270219197	-1.3886719710155522
0.7880027789522501	-1.4217333931892775
0.7924730939834916	-1.455256703537351
0.7969473000245735	-1.4892449326477566
0.8014253267023581	-1.5237011105986336
0.8059071053113868	-1.558628266972721
0.8103925687653537	-1.5940294308713134
0.8148816515502447	-1.6299076309277476
0.8193742896790717	-1.6662658953204295
0.8238704206481446	-1.703107251785434
0.828369983394817	-1.740434727628677
0.8328729182566519	-1.7782513497376948
0.8373791669319504	-1.816560144593027
0.8418886724415946	-1.855364138279235
0.84640137909215	-1.8946663564955577
0.8509172324401841	-1.9344698245662266
0.8554361792577536	-1.9747775674504473
0.8599581674990142	-2.01559260975206
0.8644831462679156	-2.056917975728896
0.8690110657869372	-2.09875668930184
0.873541877366829	-2.141111774063603
0.8780755333773183	-2.1839862532872223
0.8826119872187477	-2.2273831499342984
0.8871511932946121	-2.271305486662977
0.8916931069849591	-2.315756285835684
0.8962376846206228	-2.3607385695266228
0.900784883458263	-2.406255359529047
0.9053346616561773	-2.4523096773623094
0.9098869782508615	-2.4989045442786995
0.91444179313429	-2.5460429812700758
0.9189990670318926	-2.5937280090743005
0.9235587614812	-2.641962648181482
0.9281208388111395	-2.6907499188400386
0.9326852621219517	-2.740092841062572
0.9372519952657146	-2.7899944346315833
0.941821002827446	-2.840457719105014
0.9463922501067705	-2.8914857138216257
0.9509657031001291	-2.943081437906233
0.9555413284835119	-2.995247910274777
0.9601190935956997	-3.047988149639259
0.9646989664219934	-3.1013051745125333
0.9692809155784172	-3.1552020032129713
0.9738649102963796	-3.2096816538689756
0.9784509204077744	-3.264747144423391
0.9830389163305124	-3.320401492637775
0.9876288690544627	-3.376647716096561
0.9922207501277969	-3.433488832211102
0.9968145316437171	-3.4909278582236016
1.0014101862275606	-3.5489678112109413
1.0060076870242634	-3.607611708088406
1.0106070076861764	-3.6668625656132945
1.01520812236122	-3.7267234003884577
1.0198110056813636	-3.787197228865714
1.024415632751429	-3.848287067349193
1.029021979138194	-3.9099959319985933
1.0336300208597988	-3.972326838832321
1.0382397343754395	-4.0352828037306
1.0428510965753373	-4.098866842438443
1.047464084770987	-4.163081970568594
1.0520786766856556	-4.227931203604356
1.0566948504451468	-4.293417556902381
1.0613125845688012	-4.359544045695345
1.0659318579607453	-4.426313685094608
1.0705526499013611	-4.493729490092746
1.0751749400389907	-4.561794475566081
1.0797987083818477	-4.630511656277089
1.0844239352901501	-4.699884046876796
1.0890506014684482	-4.769914661907072
1.0936786879581573	-4.840606515802907
1.09830817613028	-4.911962622894595
1.1029390476783163	-4.983985997409893
1.1075712846113537	-5.056679653476099
1.1122048692473343	-5.130046605122117
1.1168397842064932	-5.204089866280417
1.12147601240496	-5.278812450789016
1.1261135370485231	-5.354217372393332
1.1307523416265517	-5.430307644748077
1.1353924099060642	-5.50708628141902
1.1400337259259512	-5.584556295884798
1.1446762739913339	-5.662720701538586
1.1493200386680675	-5.741582511689812
1.1539650047773782	-5.821144739565794
1.158611157390627	-5.901410398313315
1.1632584818242087	-5.982382501000226
1.167906963634567	-6.06406406061693
1.1725565886133358	-6.146458090077918
1.1772073427825949	-6.229567602223188
1.1818592123902396	-6.313395609819699
1.1865121839054606	-6.397945125562729
1.1911662440143351	-6.483219162077276
1.195821379615515	-6.5692207319193425
1.2004775778160255	-6.655952847577266
1.2051348259271555	-6.743418521472966
1.2097931114604505	-6.831620765963201
1.2144524221237927	-6.920562593340762
1.2191127458175783	-7.01024701583568
1.2237740706309785	-7.100677045616353
1.2284363848382915	-7.191855694790717
1.233099676895373	-7.283785975407317
1.237763935436155	-7.3764708994564225
1.242429149269237	-7.469913478871054
1.2470953073745614	-7.564116725528055
1.25176239890016	-7.659083651249071
1.256430413158975	-7.75481726780157
1.2610993396257528	-7.851320586899784
1.265769167934006	-7.948596620205697
1.2704398878730438	-8.046648379329932
1.2751114893850681	-8.145478875832689
1.279783962562336	-8.245091121224624
1.2844572976443813	-8.345488126967712
1.2891314850153022	-8.446672904476122
1.2938065152011016	-8.548648465117028
1.2984823788670952	-8.651417820211444
1.3031590668153652	-8.754983981035002
1.3078365699822785	-8.859349958818761
1.3125148794360526	-8.964518764749952
1.3171939863743785	-9.07049340997275
1.3218738821220892	-9.17727690558898
1.326554558128885	-9.284872262658883
1.3312360059670998	-9.39328249220176
1.3359182173295225	-9.50251060519672
1.3406011840272587	-9.612559612583324
1.3452848979876408	-9.723432525262266
1.3499693512521789	-9.83513235409601
1.354654535974561	-9.94766210990943
1.3593404444186863	-10.061024803490445
1.3640270689567473	-10.17522344559062
1.368714402067347	-10.290261046925755
1.3734024363336572	-10.406140618176506
1.378091164441613	-10.522865169988922
1.382780579178147	-10.640437712975043
1.387470673429458	-10.758861257713434
1.392161440179314	-10.878138814749718
1.3968528725073937	-10.998273394597145
1.4015449635876551	-11.119268007737075
1.4062377066867455	-11.241125664619513
1.4109310951624352	-11.363849375663598
1.4156251224620893	-11.487442151258112
1.420319782121165	-11.611907001761928
1.4250150677617444	-11.737246937504537
1.4297109730910886	-11.863464968786456
1.4344074919002308	-11.990564105879725
1.439104618062586	-12.118547359028325
1.443802345532599	-12.247417738448647
1.448500668344409	-12.377178254329888
1.453199580610549	-12.507831916834503
1.457899076520662	-12.639381736098596
1.4625991503402531	-12.771830722232345
1.4672997964094523	-12.905181885320385
1.4720010091418139	-13.03943823542222
1.476702783023131	-13.174602782572578
1.481405112610276	-13.310678536781825
1.4861079925300618	-13.447668508036287
1.4908114174781264	-13.58557570629868
1.495515382217838	-13.72440314150839
1.5002198815792203	-13.864153823581896
1.504924910457898	-14.004830762413052
1.5096304638140634	-14.14643696787347
1.5143365366714634	-14.28897544981284
1.5190431241164002	-14.432449218059233
1.523750221296757	-14.57686128241946
1.528457823421039	-14.722214652679341
1.5331659257574324	-14.868512338604065
1.5378745236328792	-15.015757349938438
1.5425836124321723	-15.163952696407245
1.5472931875970657	-15.31310138771546
1.5520032446254008	-15.463206433548642
1.5567137790702474	-15.614270843573083
1.5614247865390642	-15.766297627436225
1.5661362626928705	-15.919289794766817
1.570848203245436	-16.073250355175272
1.5755606039624817	-16.228182318253857
1.5802734606608997	-16.38408869357701
1.5849867692079835	-16.540972490701545
1.589700525520674	-16.698836719166962
1.5944147255648167	-16.857684388495606
1.5991293653544352	-17.01751850819302
1.6038444409510162	-17.178342087748074
1.6085599484628061	-17.34015813663327
1.613275884044121	-17.50296966430494
1.6179922438946697	-17.666779680203483
1.6227090242588875	-17.831591193753578
1.6274262214252813	-17.99740721436442
1.6321438317257866	-18.16423075142991
1.6368618515351367	-18.33206481432887
1.6415802772702421	-18.50091241242529
1.6462991053895788	-18.670776555068457
1.651018332392591	-18.841660251593236
1.6557379548190996	-19.013566511320207
1.6604579692487265	-19.186498343555883
1.6651783723003213	-19.3604587575929
1.669899160631406	-19.535450762710237
1.6746203309376217	-19.7114773681733
1.6793418799521906	-19.888541583234247
1.6840638044453837	-20.06664641713202
1.688786101223997	-20.24579487909265
1.6935087671308404	-20.42598997832933
1.6982317990442308	-20.60723472404267
1.702955193877496	-20.789532125420763
1.7076789485784876	-20.972885191639477
1.7124030601290983	-21.157296931862483
1.7171275255447924	-21.342770355241527
1.7218523418741398	-21.52930847091651
1.7265775061983604	-21.716914288015705
1.7313030156308737	-21.905590815655835
1.736028867316859	-22.095341062942303
1.7407550584328173	-22.28616803896928
1.7454815861861483	-22.478074752819865
1.7502084478147273	-22.671064213566268
1.754935640586491	-22.86513943026987
1.7596631617990328	-23.06030341198145
1.7643910087792	-23.25655916774124
1.7691191788827028	-23.453909706579147
1.7738476694937229	-23.65235803751478
1.7785764780245363	-23.85190716955768
1.7833056019151343	-24.052560111707386
1.7880350386328572	-24.25431987295359
1.7927647856720288	-24.45718946227623
1.7974948405536002	-24.661171888645672
1.8022252008247963	-24.866270161022744
1.806955864058772	-25.072487288358943
1.8116868278542673	-25.27982627959649
1.8164180898352762	-25.48829014366848
1.8211496476507119	-25.69788188949896
1.8258814989740861	-25.908604526003103
1.8306136415031844	-26.12046106208722
1.835346072959755	-26.333454506648984
1.8400787910891958	-26.547587868577438
1.8448117936602506	-26.762864156753174
1.849545078464707	-26.97928638004838
1.8542786433171017	-27.196857547326967
1.8590124860544273	-27.41558066744468
1.8637466045358466	-27.63545874924918
1.8684809966424103	-27.856494801580162
1.8732156602767756	-28.078691833269406
1.8779505933629363	-28.30205285314094
1.8826857938459485	-28.526580870011056
1.8874212596916682	-28.752278892688484
1.8921569888864866	-28.979149929974405
1.8968929794370748	-29.20719699066261
1.901629229370127	-29.43642308353952
1.9063657367321118	-29.666831217384356
1.9111024995890258	-29.898424400969105
1.9158395160261494	-30.131205643058767
1.9205767841478083	-30.365177952411262
1.9253143020771384	-30.600344337777663
1.9300520679558513	-30.83670780790216
1.9347900799440092	-31.074271371522247
1.9395283362197955	-31.31303803736868
1.944266834979295	-31.553010814165688
1.9490055744362744	-31.794192710630956
1.953744552821966	-32.036586735475666
1.9584837683848564	-32.28019589740472
1.963223219390476	-32.52502320511668
1.9679629041211937	-32.77107166730393
1.972702820876011	-33.01834429265261
1.9774429679703642	-33.26684408984286
1.982183343735926	-33.5165740675488
1.9869239465204103	-33.76753723443856
1.99166477468738	-34.01973659917446
1.9964058266160583	-34.27317517041294
2.001147100701141	-34.52785595680475
2.005888595352617	-34.78378196699492
2.0106303089955797	-35.04095620962294
2.0153722400700538	-35.29938169332264
2.020114387030818	-35.55906142672242
2.02485674834723	-35.81999841844527
2.0295993225030577	-36.08219567710881
2.0343421079963067	-36.34565621132527
2.039085103339056	-36.61038302970173
2.043828307057297	-36.87637914084003
2.048571717690764	-37.143647553336905
2.053315333792781	-37.41219127578396
2.058059153930104	-37.68201331676782
2.0628031766827593	-37.953116684870146
2.067547400643901	-38.2255043886677
2.0722918244196493	-38.49917943673231
2.0770364466289495	-38.774144837631084
2.08178126590342	-39.050403599926334
2.0865262808872123	-39.327958732175695
2.091271490236863	-39.60681324293209
2.096016892621156	-39.88697014074392
2.1007624867209835	-40.168432434154994
2.105508271229209	-40.451203131704645
2.1102542448505277	-40.735285241927706
2.115000406301341	-41.020681773354625
2.1197467543096176	-41.307395734511516
2.1244932876147686	-41.595430133920146
2.129240004967516	-41.88478798009806
2.1339869051297677	-42.17547228155851
2.138733986874493	-42.46748604681063
2.1434812489856	-42.760832284359395
2.1482286902578127	-43.05551400270573
2.1529763094965513	-43.35153421034643
2.1577241055178162	-43.64889591577436
2.162472077148069	-43.947602127478405
2.1672202232241182	-44.24765585394355
2.1719685425930053	-44.549060103650824
2.1767170341118933	-44.851817885077494
2.181465696647956	-45.155932206696974
2.1862145290782693	-45.46140607697902
2.190963530289699	-45.76824250438951
2.195712699178802	-46.076444497390746
2.200462034651717	-46.38601506444137
2.205211535624059	-46.69695721399642
2.209961201020821	-47.0092739545073
2.2147110297762715	-47.32296829442195
2.2194610208338537	-47.63804324218479
2.2242111731460885	-47.95450180623683
2.2289614856744753	-48.27234699501552
2.2337119573894015	-48.59158181695502
2.2384625872700408	-48.91220928048614
2.2432133743042635	-49.23423239403628
2.247964317488546	-49.55765416602969
2.2527154158278746	-49.8824776048872
2.2574666683356597	-50.208705719026504
2.2622180740336457	-50.5363415168621
2.2669696319518233	-50.865388006805354
2.2717213411283432	-51.195848197264375
2.27647320060943	-51.52772509664433
2.2812252094492975	-51.86102171334722
2.2859773667100676	-52.19574105577208
2.290729671461685	-52.531886132314845
2.2954821227818374	-52.86945995136855
2.3002347197558755	-53.20846552132325
2.304987461476734	-53.548905850566115
2.309740347044849	-53.890783947481346
2.3144933755680888	-54.23410282045037
2.31924654616167	-54.57886547785171
2.3239998579480856	-54.92507492806118
2.328753310057031	-55.27273417945167
2.3335069016253263	-55.62184624039343
2.338260631796849	-55.972414119253955
2.34301449972246	-56.32444082439806
2.3477685045599292	-56.677929364187825
2.352522645473872	-57.03288274698271
2.3572769216356733	-57.389303981139584
2.3620313322234248	-57.74719607501272
2.3667858764218557	-58.1065620369538
2.371540553422261	-58.4674048753119
2.3762953624224434	-58.82972759843367
2.3810503026266447	-59.1935332146632
2.3858053732454785	-59.55882473234219
2.3905605734958715	-59.92560515980973
2.3953159026009962	-60.2938775054026
2.4000713597902137	-60.663644777455175
2.404826944299009	-61.034909984299425
2.4095826553689292	-61.40767613426491
2.414338492247526	-61.78194623567891
2.419094454188298	-62.157723296866386
2.423850540450627	-62.535010326150015
2.4286067502997257	-62.91381033185013
2.4333630830065758	-63.29412632228486
2.4381195378478755	-63.67596130577012
2.4428761141059825	-64.05931829061963
2.4476328110688557	-64.4442002851448
2.4523896280300046	-64.83061029765503
2.457146564288436	-65.21855133645744
2.4619036191485955	-65.60802640985713
2.4666607919203205	-65.99903852615698
2.471418081918785	-66.39159069365785
2.476175488464449	-66.7856859206585
2.4809330108830085	-67.18132721545568
2.4856906485053436	-67.57851758634409
2.4904484006674688	-67.9772600416163
2.495206266710487	-68.37755758956305
2.499964245980537	-68.77941323847304
2.504722337828748	-69.182829996633
2.509480541611191	-69.58781087232765
2.514238856688831	-69.99435887383986
2.518997282427485	-70.40247700945064
2.5237558181977704	-70.81216828743902
2.5285144633750622	-71.22343571608215
2.5332732173394503	-71.63628230365536
2.5380320794756916	-72.05071105843217
2.5427910491731684	-72.46672498868423
2.5475501258258437	-72.88432710268134
2.55230930883222	-73.30352040869158
2.557068597595295	-73.72430791498125
2.5618279915225224	-74.1466926298149
2.566587490025767	-74.5706775614552
2.571347092521267	-74.99626571816326
2.5761067984295907	-75.42346010819834
2.580866607175599	-75.85226373981821
2.5856265181884046	-76.28267962127866
2.5903865309013314	-76.71471076083402
2.5951466447518796	-77.14836016673694
2.599906859181683	-77.58363084723833
2.6046671736364737	-78.02052581058761
2.609427587566044	-78.45904806503245
2.6141881004242093	-78.899200618819
2.6189487116687715	-79.34098648019184
2.623709420761484	-79.78440865739394
2.628470227168012	-80.22947015866671
2.6332311303579004	-80.67617399225003
2.6379921298045406	-81.12452316638225
2.642753224985129	-81.57452068930024
2.64751441538064	-82.02616956923926
2.6522757004757858	-82.47947281443317
2.6570370797589877	-82.93443343311432
2.6617985527223422	-83.39105443351367
2.666560118861583	-83.84933882386049
2.671321777676055	-84.30928961238293
2.67608352866868	-84.77090980730748
2.6808453713459226	-85.23420241685933
2.6856073052177596	-85.69917044926216
2.6903693297976528	-86.16581691273834
2.6951314446025116	-86.6341448155088
2.699893649152669	-87.10415716579327
2.7046559429718444	-87.57585697180984
2.7094183255871203	-88.04924724177543
2.714180796528911	-88.52433098390563
2.71894335533093	-89.00111120641463
2.723706001530165	-89.47959091751544
2.7284687346668455	-89.95977312541952
2.7332315542844197	-90.44166083833728
2.737994459929522	-90.92525706447773
2.7427574511519466	-91.41056481204869
2.7475205275046206	-91.8975870892566
2.7522836885435757	-92.3863269043067
2.7570469338279233	-92.87678726540308
2.761810262919825	-93.36897118074853
2.7665736753844703	-93.86288165854455
2.7713371707900447	-94.35852170699152
2.77610074870771	-94.85589433428862
2.7808644087115755	-95.35500254863385
2.7856281503786726	-95.8558493582239
2.790391973288931	-96.35843777125447
2.795155877025154	-96.86277079592001
2.7999198611729925	-97.36885144041385
2.804683925320923	-97.8766827129281
2.8094480690602204	-98.38626762165377
2.8142122919849384	-98.89760917478085
2.818976593691883	-99.41071038049814
2.823740973780588	-99.92557424699324
2.828505431853297	-100.44220378245278
2.8332699675149358	-100.96060199506229
2.8380345803730918	-101.48077189300618
2.8427992700379927	-102.00271648446781
2.84756403612248	-102.52643877762945
2.8523288782419933	-103.05194178067235
2.8570937960145453	-103.57922850177671
2.861858789060698	-104.10830194912171
2.8666238570035465	-104.6391651308854
2.8713889994686936	-105.17182105524493
2.8761542160842324	-105.70627273037643
2.8809195064807245	-106.24252316445495
2.8856848702911755	-106.78057536565456
2.890450307151023	-107.3204323421484
2.8952158166981095	-107.86209710210856
2.8999813985726655	-108.40557265370626
2.9047470524172896	-108.95086200511159
2.9095127778769294	-109.49796816449383
2.914278574598861	-110.04689414002124
2.9190444422326722	-110.59764293986117
2.9238103804302393	-111.15021757218
2.928576388845714	-111.70462104514314
2.933342467135502	-112.26085636691519
2.938108614958244	-112.81892654565985
2.9428748319747977	-113.37883458953972
2.947641117848223	-113.94058350671665
2.9524074722437588	-114.50417630535159
2.9571738948288124	-115.06961599360463
2.9619403852729334	-115.6369055796348
2.9667069432478033	-116.2060480716005
2.9714735684272178	-116.77704647765911
2.9762402604870646	-117.34990380596719
2.9810070191053133	-117.92462306468055
2.985773843961994	-118.50120726195385
2.990540734739183	-119.07965940594126
2.9953076911209857	-119.65998250479593
3.000074712793522	-120.24217956667027
3.004841799444907	-120.82625359971571
3.0096089507652386	-121.41220761208307
3.01437616644658	-122.00004461192219
3.019143446182945	-122.58976760738229
3.023910789670282	-123.18137960661156
3.028678196606458	-123.77488361775755
3.033445666691245	-124.37028264896706
3.0382131996263064	-124.96757970838608
3.0429807951151755	-125.56677780415966
3.047748452863251	-126.16787994443231
3.052516172577772	-126.77088913734767
3.0572839539678127	-127.37580839104866
3.0620517967442615	-127.98264071367738
3.06681970061981	-128.5913891133753
3.071587665308938	-129.202056598283
3.0763556905279015	-129.81464617654058
3.0811237759947145	-130.429160856287
3.0858919214291403	-131.04560364566092
3.090660126552676	-131.66397755280005
3.0954283910885376	-132.2842855858414
3.1001967147616516	-132.9065307529214
3.104965097298633	-133.53071606217569
3.109733538427782	-134.15684452173912
3.114502037879067	-134.78491913974594
3.119270595384109	-135.41494292432986
3.1240392106761727	-136.04691888362362
3.1288078834901554	-136.68085002575947
3.133576613562568	-137.31673935886892
3.138345400631531	-137.9545898910829
3.1431142444367537	-138.59440463053156
3.1478831447195295	-139.2361865853444
3.152652101222721	-139.87993876365042
3.157421113690747	-140.52566417357787
3.1621901818695712	-141.17336582325422
3.1669593055066936	-141.8230467208065
3.171728484351133	-142.47470987436108
3.176497718153422	-143.12835829204369
3.1812670066655917	-143.7839949819793
3.1860363496411606	-144.44162295229233
3.1908057468351263	-145.10124521110677
3.1955751980039513	-145.7628647665458
3.200344702905552	-146.4264846267319
3.2051142612992916	-147.09210779978727
3.2098838729459653	-147.75973729383318
3.214653537607792	-148.42937611699048
3.219423255048402	-149.10102727737953
3.224193025032827	-149.77469378311977
3.228962847327493	-150.45037864233043
3.2337327217002043	-151.1280848631299
3.2385026479201384	-151.8078154536362
3.243272625757832	-152.48957342196647
3.248042654985173	-153.17336177623758
3.2528127353753926	-153.8591835245658
3.2575828667030495	-154.5470416750668
3.262353048744027	-155.23693923585552
3.267123281275519	-155.9288792150466
3.2718935640760205	-156.62286462075403
3.2766638969253217	-157.31889846109132
3.281434279604494	-158.01698374417128
3.286204711895883	-158.7171234781064
3.2909751935831	-159.41932067100848
3.295745724451013	-160.1235783309889
3.3005163042857317	-160.82989946615837
3.3052869328746093	-161.53828708462717
3.3100576100062233	-162.24874419450515
3.3148283354703727	-162.9612738039015
3.319599109058067	-163.67587892092493
3.3243699305615184	-164.39256255368372
3.3291407997741307	-165.11132771028556
3.333911716490497	-165.8321773988377
3.3386826805063814	-166.5551146274469
3.3434536916187207	-167.2801424042194
3.348224749625609	-168.00726373726084
3.3529958543262937	-168.73648163467658
3.3577670055211644	-169.46779910457147
3.362538203011745	-170.20121915504967
3.367309446600689	-170.93674479421503
3.372080736091768	-171.67437903017094
3.3768520712898638	-172.41412487102033
3.3816234520009636	-173.1559853248655
3.3863948780321493	-173.89996339980843
3.3911663491915895	-174.64606210395067
3.3959378652885364	-175.39428444539323
3.4007094261333104	-176.14463343223665
3.4054810315373003	-176.89711207258108
3.4102526813129534	-177.65172337452617
3.415024375273764	-178.40847034617127
3.419796113234271	-179.16735599561503
3.4245678950100498	-179.9283833309558
3.4293397204177034	-180.69155536029157
3.434111589274857	-181.45687509171987
3.4388835014001478	-182.22434553333758
3.443655456613222	-182.9939696932415
3.448427454734727	-183.76575057952772
3.453199495586301	-184.53969120029194
3.457971578990571	-185.31579456362977
3.4627437047711416	-186.0940636776359
3.4675158727525917	-186.87450155040494
3.472288082760466	-187.65711119003103
3.477060334621268	-188.44189560460788
3.481832628162455	-189.22885780222873
3.486604963212432	-190.01800079098652
3.491377339600541	-190.80932757897367
3.4961497571570597	-191.60284117428245
3.5009222157131923	-192.39854458500434
3.505694715101063	-193.1964408192308
3.510467255153713	-193.99653288505263
3.5152398357050902	-194.79882379056053
3.5200124565900444	-195.60331654384444
3.524785117644322	-196.41001415299425
3.529557818704559	-197.21891962609936
3.534330559608277	-198.0300359712487
3.5391033401938734	-198.84336619653092
3.543876160300619	-199.65891331003425
3.548649019768651	-200.47668031984662
3.553421918438967	-201.29667023405557
3.558194856153418	-202.11888606074814
3.562967832754705	-202.94333080801115
3.5677408480863724	-203.7700074839311
3.572513901992802	-204.59891909659396
3.577286994319208	-205.43006865408563
3.582060124911629	-206.26345916449117
3.586833293616927	-207.0990936358958
3.5916065002827793	-207.93697507638404
3.5963797447576713	-208.7771064940404
3.601153026890895	-209.61949089694855
3.60592634653254	-210.46413129319228
3.610699703533493	-211.31103069085486
3.6154730977454266	-212.16019209801928
3.6202465290207972	-213.01161852276798
3.6250199972128416	-213.86531297318325
3.6297935021755694	-214.72127845734715
3.6345670437637563	-215.5795179833412
3.639340621832943	-216.44003455924667
3.644114236239429	-217.3028311931445
3.648887886840266	-218.16791089311528
3.6536615734932547	-219.03527666723943
3.658435296056937	-219.90493152359684
3.663209054390596	-220.77687847026712
3.6679828483542494	-221.65112051532972
3.672756677808639	-222.52766066686365
3.6775305426152363	-223.40650193294755
3.68230444263623	-224.28764732165985
3.687078377734523	-225.17109984107867
3.6918523477737293	-226.05686249928178
3.696626352618169	-226.9449383043468
3.701400392132862	-227.8353302643507
3.7061744661835268	-228.72804138737044
3.710948574636572	-229.62307468148265
3.7157227173590948	-230.52043315476368
3.720496894218876	-231.42011981528933
3.725271105084374	-232.32213767113535
3.7300453498247235	-233.2264897303772
3.734819628309728	-234.1331790010901
3.739593940409857	-235.04220849134862
3.7443682859962433	-235.95358120922742
3.7491426649406736	-236.86730016280077
3.7539170771155925	-237.7833683601427
3.75869152239409	-238.70178880932679
3.7634660006499026	-239.62256451842643
3.768240511757408	-240.5456984955148
3.7730150555916206	-241.4711937486649
3.777789632028186	-242.39905328594904
3.7825642409433815	-243.3292801154397
3.7873388822141063	-244.26187724520878
3.7921135557178824	-245.19684768332826
3.796888261332849	-246.13419443786944
3.801662998937757	-247.07392051690363
3.8064377684119672	-248.01602892850175
3.811212569635447	-248.9605226807346
3.815987402488763	-249.90740478167248
3.820762266853082	-250.85667823938567
3.8255371626101637	-251.80834606194404
3.830312089642359	-252.76241125741726
3.835087047832606	-253.71887683387487
3.8398620370644236	-254.6777457993858
3.844637057221912	-255.6390211620191
3.8494121081897497	-256.60270592984324
3.854187189853181	-257.56880311092686
3.858962302098026	-258.53731571333805
3.863737444810667	-259.50824674514473
3.8685126178780456	-260.4815992144145
3.8732878211876662	-261.45737612921465
3.878063054627585	-262.4355804976124
3.882838318086412	-263.4162153276748
3.887613611453304	-264.3992836274686
3.892388934617961	-265.3847884050602
3.897164287470628	-266.37273266851565
3.901939669902086	-267.36311942590123
3.9067150818036485	-268.3559516852824
3.9114905230671644	-269.3512324547248
3.916265993585008	-270.3489647422937
3.9210414932500814	-271.34915155605415
3.925817021955807	-272.351795904071
3.9305925795961243	-273.3569007944089
3.9353681660654907	-274.36446923513216
3.9401437812588758	-275.3745042343049
3.944919425071758	-276.3870087999912
3.94969509740012	-277.40198594025446
3.9544707981404508	-278.41943866315836
3.959246527189737	-279.4393699767662
3.964022284445465	-280.461782889141
3.9687980698056124	-281.48668040834553
3.97357388316865	-282.5140655424423
3.978349724433535	-283.543941299494
3.983125593499713	-284.5763106875627
3.9879014902671077	-285.61117671471027
3.9926774146361246	-286.6485423889984
3.997453366507646	-287.6884107184888
4.002229345783028	-288.73078471124285
4.007005352364096	-289.7756673753215
4.011781386153145	-290.8230617187859
4.016557447052935	-291.87297074969655
4.02133353496669	-292.9253974761143
4.026109649798088	-293.98034490609916
4.030885791451274	-295.03781604771126
4.035661959830839	-296.0978139090106
4.040438154841827	-297.16034149805694
4.045214376389735	-298.22540182290976
4.049990624380502	-299.2929978916284
4.054766898720514	-300.3631327122719
4.059543199316598	-301.4358092928993
4.064319526076016	-302.51103064156945
4.069095878906468	-303.58879976634057
4.073872257716089	-304.6691196752712
4.078648662413443	-305.75199337641953
4.083425092907523	-306.83742387784343
4.088201549107748	-307.9254141876007
4.09297803092396	-309.0159673137491
4.097754538266421	-310.1090862643459
4.1025310710458145	-311.20477404744855
4.107307629173236	-312.30303367111367
4.112084212560197	-313.4038681433984
4.11686082111862	-314.50728047235935
4.121637454760835	-315.6132736660531
4.126414113399581	-316.72185073253587
4.1311907969479975	-317.83301467986377
4.135967505319629	-318.94676851609296
4.14074423842842	-320.0631152492791
4.145520996188706	-321.18205788747775
4.150297778515223	-322.3035994387443
4.1550745853231	-323.42774291113415
4.159851416527852	-324.5544913127022
4.1646282720453875	-325.68384765150364
4.169405151791995	-326.815814935593
4.17418205568435	-327.9503961730249
4.178958983639512	-329.087594371854
4.183735935574911	-330.22741254013386
4.188512911408364	-331.36985368591917
4.193289911058059	-332.51492081726354
4.198066934442554	-333.6626169422208
4.202843981480782	-334.8129450688445
4.207621052092041	-335.96590820518804
4.212398146196	-337.12150935930464
4.217175263712687	-338.27975153924734
4.221952404562498	-339.4406377530695
4.226729568666184	-340.60417100882313
4.231506755944856	-341.7703543145612
4.236283966319983	-342.9391906783362
4.24106119971339	-344.1106831082003
4.245838456047248	-345.28483461220566
4.250615735244081	-346.4616481984043
4.255393037226764	-347.64112687484794
4.260170361918516	-348.8232736495884
4.2649477092429	-350.00809153067695
4.269725079123823	-351.195583526165
4.2745024714855315	-352.38575264410395
4.27927988625261	-353.57860189254455
4.28405732334998	-354.7741342795379
4.288834782702902	-355.9723528131346
4.293612264236963	-357.1732605013854
4.298389767878087	-358.37686035234094
4.303167293552521	-359.583155374051
4.307944841186845	-360.792148574566
4.312722410707962	-362.00384296193596
4.317500002043102	-363.2182415442107
4.322277615119813	-364.43534732944
4.327055249865963	-365.6551633256734
4.331832906209745	-366.8776925409604
4.336610584079661	-368.1029379833501
4.341388283404536	-369.33090266089215
4.346166004113498	-370.5615895816349
4.350943746135996	-371.79500175362756
4.355721509401784	-373.0311421849188
4.360499293840926	-374.2700138835573
4.365277099383792	-375.51161985759137
4.370054925961059	-376.7559631150694
4.374832773503699	-378.00304666403963
4.379610641942999	-379.25287351255014
4.384388531210532	-380.5054466686487
4.389166441238179	-381.76076914038316
4.3939443719581135	-383.01884393580116
4.398722323302806	-384.2796740629501
4.403500295205017	-385.54326252987755
4.408278287597801	-386.80961234463064
4.413056300414504	-388.07872651525656
4.417834333588758	-389.35060804980253
4.422612387054486	-390.62525995631495
4.427390460745891	-391.9026852428407
4.432168554597462	-393.18288691742646
4.436946668543974	-394.46586798811865
4.441724802520481	-395.7516314629637
4.446502956462313	-397.0401803500078
4.451281130305082	-398.33151765729707
4.456059323984674	-399.62564639287746
4.460837537437255	-400.9225695647949
4.465615770599256	-402.2222901810949
4.470394023407388	-403.5248112498232
4.475172295798627	-404.83013577902534
4.479950587710221	-406.13826677674655
4.484728899079685	-407.44920725103213
4.489507229844801	-408.7629602099272
4.4942855799436146	-410.0795286614768
4.499063949314437	-411.398915613726
4.503842337895839	-412.72112407471917
4.508620745626652	-414.0461570525011
4.5133991724459674	-415.3740175551163
4.518177618293136	-416.7047085906093
4.522956083107764	-418.0382331670243
4.5277345668297135	-419.37459429240556
4.532513069399098	-420.713794974797
4.537291590756286	-422.055838222243
4.542070130841896	-423.4007270427867
4.546848689596797	-424.74846444447223
4.551627266962108	-426.09905343534325
4.55640586287919	-427.452497023443
4.561184477289657	-428.80879821681515
4.565963110135361	-430.1679600235028
4.570741761358403	-431.5299854515493
4.575520430901124	-432.89487750899747
4.580299118706104	-434.2626392038906
4.585077824716163	-435.63327354427105
4.589856548874363	-437.0067835381818
4.594635291123999	-438.3831721936655
4.599414051408604	-439.76244251876466
4.604192829671946	-441.1445975215217
4.6089716258580244	-442.52964020997877
4.613750439911072	-443.9175735921782
4.618529271775553	-445.3084006761624
4.6233081213961595	-446.7021244699727
4.628086988717816	-448.0987479816514
4.63286587368567	-449.4982742192402
4.637644776245099	-450.90070619078074
4.642423696341703	-452.30604690431466
4.647202633921309	-453.71429936788337
4.651981588929962	-455.12546658952823
4.656760561313935	-456.539551577291
4.6615395510197155	-457.95655733921194
4.666318557994013	-459.3764868833327
4.671097582183756	-460.7993432176942
4.675876623536089	-462.2251293503371
4.680655681998374	-463.6538482893024
4.685434757518186	-465.0855030426307
4.690213850043313	-466.5200966183626
4.69499295952176	-467.9576320245386
4.699772085901743	-469.3981122691994
4.704551229131682	-470.84154036038456
4.709330389160215	-472.28791930613465
4.714109565936183	-473.7372521144898
4.718888759408636	-475.18954179349004
4.723667969526833	-476.64479135117523
4.728447196240233	-478.10300379558515
4.733226439498505	-479.5641821347596
4.738005699251517	-481.0283293767383
4.742784975449341	-482.4954485295606
4.747564268042249	-483.96554260126584
4.752343576980715	-485.43861459989364
4.757122902215413	-486.91466753348317
4.76190224369721	-488.3937044100735
4.766681601377177	-489.8757282377038
4.771460975206576	-491.3607420244131
4.776240365136868	-492.8487487782406
4.781019771119705	-494.33975150722443
4.785799193106933	-495.8337532194038
4.790578631050593	-497.3307569228171
4.795358084902914	-498.83076562550303
4.8001375546163185	-500.3337823355
4.8049170401434145	-501.8398100608464
4.809696541437003	-503.34885180958054
4.8144760584500705	-504.8609105897406
4.8192555911357875	-506.375989409365
4.824035139447516	-507.8940912764911
4.828814703338796	-509.41521919915743
4.833594282763358	-510.9393761854015
4.838373877675113	-512.4665652432614
4.84315348802815	-513.9967893807743
4.847933113776746	-515.5300516059784
4.852712754875354	-517.0663549269111
4.857492411278607	-518.6057023516099
4.862272082941319	-520.1480968881117
4.867051769818476	-521.6935415444542
4.871831471865247	-523.2420393286744
4.876611189036974	-524.7935932488097
4.881390921289174	-526.3482063128968
4.88617066857754	-527.9058815289729
4.890950430857934	-529.4666219050748
4.8957302080863965	-531.0304304492395
4.900510000219135	-532.5973101695033
4.905289807212528	-534.1672640739031
4.910069629023128	-535.7402951704755
4.914849465607653	-537.3164064672568
4.919629316922989	-538.8956009722835
4.924409182926192	-540.477881693592
4.9291890635744835	-542.0632516392185
4.933968958825251	-543.6517138171995
4.93874886863605	-545.2432712355708
4.943528792964591	-546.8379269023683
4.948308731768758	-548.435683825628
4.953088685006594	-550.0365450133858
4.957868652636304	-551.6405134736776
4.9626486346162535	-553.2475922145392
4.967428630904969	-554.8577842440059
4.972208641461138	-556.4710925701139
4.976988666243605	-558.0875202008983
4.98176870521137	-559.7070701443946
4.986548758323597	-561.3297454086379
4.991328825539601	-562.9555490016637
4.996108906818855	-564.5844839315073
5.000889002120987	-566.2165532062039
5.005669111405779	-567.8517598337883
5.010449234633167	-569.4901068222957
5.015229371763239	-571.1315971797612
5.0200095227562365	-572.7762339142195
5.024789687572549	-574.424020033705
5.029569866172722	-576.0749585462529
5.034350058517448	-577.7290524598976
5.039130264567567	-579.3863047826738
5.043910484284072	-581.0467185226162
5.048690717628099	-582.710296687759
5.053470964560934	-584.3770422861367
5.058251225044011	-586.0469583257835
5.063031499038905	-587.7200478147339
5.067811786507342	-589.3963137610216
5.072592087411185	-591.075759172681
5.077372401712448	-592.7583870577462
5.082152729373283	-594.444200424251
5.086933070355988	-596.1332022802294
5.091713424622999	-597.8253956337153
5.096493792136899	-599.5207834927427
5.1012741728604025	-601.2193688653449
5.10605456675637	-602.9211547595555
5.110834973787801	-604.6261441834083
5.115615393917831	-606.3343401449368
5.120395827109736	-608.0457456521746
5.1251762733269235	-609.7603637131548
5.1299567325329445	-611.4781973359107
5.134737204691484	-613.1992495284762
5.139517689766357	-614.9235232988839
5.144298187721518	-616.6510216551667
5.149078698521057	-618.3817476053583
5.153859222129192	-620.1157041574913
5.158639758510278	-621.8528943195988
5.163420307628801	-623.593321099714
5.168200869449376	-625.3369875058693
5.172981443936753	-627.0838965460974
5.177762031055811	-628.8340512284317
5.182542630771555	-630.5874545609041
5.187323243049123	-632.3441095515474
5.192103867853781	-634.1040192083941
5.1968845051509245	-635.8671865394768
5.201665154906071	-637.633614552828
5.206445817084869	-639.4033062564796
5.2112264916530915	-641.1762646584644
5.21600717857664	-642.9524927668149
5.220787877821535	-644.7319935895623
5.225568589353928	-646.514770134739
5.23034931314009	-648.3008254103777
5.235130049146417	-650.0901624245098
5.239910797339427	-651.8827841851675
5.244691557685761	-653.6786937003825
5.249472330152182	-655.4778939781869
5.2542531147055715	-657.2803880266125
5.259033911312933	-659.0861788536905
5.263814719941392	-660.8952694674529
5.268595540558191	-662.7076628759314
5.27337637313069	-664.5233620871572
5.278157217626371	-666.3423701091624
5.282938074012831	-668.1646899499779
5.287718942257787	-669.9903246176352
5.29249982232907	-671.8192771201658
5.2972807141946285	-673.6515504656012
5.302061617822526	-675.487147661972
5.306842533180941	-677.3260717173094
5.311623460238168	-679.168325639645
5.316404398962614	-681.0139124370096
5.321185349322802	-682.8628351174343
5.325966311287365	-684.7150966889499
5.33074728482505	-686.5707001595875
5.335528269904718	-688.4296485373781
5.340309266495338	-690.291944830352
5.345090274565992	-692.15759204654
5.349871294085873	-694.0265931939731
5.354652325024285	-695.8989512806818
5.359433367350637	-697.7746693146968
5.364214421034452	-699.6537503040482
5.3689954860453595	-701.5361972567672
5.3737765623530995	-703.4220131808839
5.378557649927515	-705.3112010844287
5.38333874873856	-707.2037639754317
5.388119858756293	-709.0997048619233
5.392900979950881	-710.9990267519337
5.397682112292597	-712.9017326534934
5.402463255751817	-714.8078255746323
5.407244410299021	-716.7173085233803
5.412025575904795	-718.630184507768
5.4168067525398325	-720.5464565358251
5.421587940174924	-722.4661276155815
5.426369138780966	-724.3892007550668
5.43115034832896	-726.3156789623112
5.435931568790005	-728.2455652453441
5.440712800135304	-730.178862612196
5.44549404233616	-732.1155740708961
5.450275295363981	-734.0557026294738
5.455056559190271	-735.9992512959594
5.459837833786631	-737.9462230783821
5.464619119124769	-739.8966209847712
5.469400415176488	-741.8504480231562
5.474181721913689	-743.8077072015669
5.478963039308372	-745.7684015280324
5.483744367332637	-747.7325340105818
5.488525705958676	-749.700107657245
5.493307055158783	-751.671125476051
5.498088414905345	-753.6455904750285
5.502869785170846	-755.6235056622072
5.507651165927869	-757.6048740456159
5.512432557149085	-759.5896986332838
5.5172139588072655	-761.5779824332398
5.521995370875277	-763.569728453513
5.526776793326073	-765.5649397021323
5.531558226132711	-767.5636191871265
5.536339669268333	-769.5657699165247
5.541121122706176	-771.5713948983553
5.54590258641957	-773.580497140647
5.550684060381939	-775.5930796514288
5.555465544566794	-777.6091454387292
5.560247038947743	-779.628697510577
5.565028543498478	-781.6517388750003
5.569810058192786	-783.6782725400284
5.574591583004544	-785.7083015136895
5.579373117907717	-787.7418288040116
5.584154662876358	-789.7788574190232
5.588936217884613	-791.8193903667532
5.593717782906711	-793.8634306552293
5.598499357916974	-795.9109812924801
5.603280942889809	-797.9620452865337
5.608062537799712	-800.0166256454187
5.612844142621266	-802.074725377163
5.617625757329135	-804.1363474897945
5.6224073818980775	-806.2014949913412
5.6271890163029346	-808.2701708898313
5.631970660518629	-810.3423781932929
5.6367523145201766	-812.4181199097538
5.64153397828267	-814.4973990472421
5.64631565178129	-816.5802186137855
5.651097334991302	-818.6665816174121
5.655879027888056	-820.7564910661494
5.66066073044698	-822.849949968025
5.665442442643592	-824.946961331067
5.670224164453484	-827.0475281633029
5.6750058958523395	-829.1516534727601
5.67978763681592	-831.2593402674665
5.6845693873200664	-833.3705915554497
5.689351147340705	-835.485410344737
5.694132916853841	-837.6037996433564
5.698914695835558	-839.7257624593344
5.703696484262022	-841.8513018006988
5.708478282109481	-843.9804206754774
5.713260089354261	-846.1131220916967
5.718041905972762	-848.2494090573849
5.722823731941473	-850.3892845805685
5.727605567236952	-852.5327516692753
5.732387411835843	-854.6798133315324
5.737169265714862	-856.8304725753663
5.741951128850806	-858.9847324088048
5.746733001220546	-861.1425958398745
5.751514882801034	-863.3040658766026
5.7562967735692965	-865.469145527016
5.761078673502437	-867.6378377991422
5.765860582577635	-869.8101457010073
5.770642500772143	-871.9860722406393
5.7754244280632925	-874.1656204260636
5.780206364428489	-876.3487932653079
5.784988309845212	-878.5355937663986
5.789770264291016	-880.7260249373629
5.794552227743528	-882.9200897862271
5.7993342001804535	-885.1177913210181
5.804116181579565	-887.3191325497623
5.808898171918714	-889.5241164804867
5.813680171175822	-891.7327461212177
5.818462179328883	-893.9450244799814
5.823244196355963	-896.1609545648047
5.828026222235201	-898.3805393837141
5.832808256944809	-900.6037819447357
5.83759030046307	-902.8306852558961
5.842372352768336	-905.0612523252216
5.8471544138390295	-907.2954861607387
5.851936483653647	-909.5333897704741
5.856718562190753	-911.7749661624529
5.861500649428982	-914.0202183447019
5.866282745347038	-916.2691493252477
5.871064849923697	-918.5217621121158
5.875846963137801	-920.7780597133326
5.880629084968261	-923.0380451369243
5.8854112153940585	-925.3017213909168
5.890193354394244	-927.5690914833366
5.894975501947931	-929.840158422209
5.899757658034306	-932.11492521556
5.904539822632621	-934.3933948714159
5.909321995722194	-936.6755703978026
5.914104177282413	-938.9614548027457
5.91888636729273	-941.2510510942711
5.923668565732664	-943.5443622804048
5.928450772581802	-945.8413913691722
5.933232987819793	-948.1421413685998
5.938015211426354	-950.4466152867122
5.942797443381268	-952.7548161315359
5.947579683664381	-955.0667469110962
5.952361932255607	-957.3824106334185
5.95714418913492	-959.7018103065291
5.961926454282362	-962.0249489384528
5.9667087276780375	-964.3518295372155
5.971491009302115	-966.6824551108432
5.976273299134828	-969.0168286673604
5.98105559715647	-971.3549532147924
5.985837903347398	-973.6968317611655
5.990620217688035	-976.0424673145046
5.995402540158865	-978.3918628828352
6.000184870740433	-980.7450214741824
6.004967209413347	-983.1019460965715
6.009749556158276	-985.4626397580284
6.01453191095595	-987.8271054665773
6.019314273787163	-990.1953462302439
6.02409664463277	-992.5673650570533
6.028879023473681	-994.9431649550305
6.033661410290873	-997.3227489322006
6.03844380506538	-999.7061199965891
6.043226207778297	-1002.0932811562205
6.048008618410781	-1004.4842354191203
6.052791036944045	-1006.8789857933135
6.057573463359361	-1009.2775352868246
6.0623558976380645	-1011.6798869076783
6.067138339761545	-1014.0860436639002
6.071920789711254	-1016.4960085635149
6.076703247468702	-1018.9097846145473
6.081485713015452	-1021.3273748250219
6.086268186333132	-1023.7487822029641
6.091050667403425	-1026.1740097563982
6.095833156208069	-1028.603060493349
6.100615652728863	-1031.0359374218413
6.105398156947663	-1033.4726435498997
6.110180668846376	-1035.9131818855485
6.114963188406974	-1038.357555436813
6.119745715611479	-1040.805767211717
6.124528250441974	-1043.2578202182863
6.129310792880594	-1045.7137174645447
6.134093342909531	-1048.1734619585163
6.138875900511033	-1050.637056708226
6.143658465667403	-1053.1045047216983
6.148441038360999	-1055.5758090069576
6.153223618574236	-1058.050972572028
6.158006206289579	-1060.5299984249345
6.162788801489551	-1063.012889573701
6.167571404156728	-1065.4996490263518
6.1723540142737425	-1067.9902797909122
6.177136631823276	-1070.4847848754048
6.181919256788069	-1072.9831672878547
6.18670188915091	-1075.4854300362863
6.191484528894644	-1077.9915761287234
6.196267176002169	-1080.5016085731907
6.2010498304564345	-1083.015530377712
6.205832492240447	-1085.533344550311
6.210615161337257	-1088.055054099013
6.215397837729972	-1090.5806620318406
6.220180521401753	-1093.110171356819
6.224963212335811	-1095.6435850819714
6.229745910515408	-1098.180906215322
6.2345286159238595	-1100.7221377648953
6.239311328544529	-1103.267282738715
6.244094048360833	-1105.8163441448048
6.24887677535624	-1108.3693249911887
6.253659509514265	-1110.9262282858906
6.2584422508184785	-1113.4870570369342
6.263224999252496	-1116.0518142523438
6.268007754799988	-1118.6205029401426
6.272790517444672	-1121.1931261083544
6.277573287170314	-1123.7696867650031
6.2823560639607345	-1126.3501879181133
6.287138847799797	-1128.9346325757072
6.291921638671418	-1131.5230237458097
6.296704436559563	-1134.1153644364435
6.301487241448242	-1136.711657655633
6.306270053321519	-1139.3119064114012
6.311052872163505	-1141.9161137117721
6.315835697958355	-1144.5242825647688
6.320618530690276	-1147.1364159784157
6.325401370343522	-1149.7525169607356
6.330184216902397	-1152.3725885197528
6.334967070351246	-1154.996633663489
6.339749930674468	-1157.6246553999697
6.344532797856504	-1160.256656737217
6.349315671881844	-1162.8926406832545
6.354098552735027	-1165.5326102461058
6.358881440400634	-1168.1765684337947
6.363664334863297	-1170.824518254344
6.3684472361076905	-1173.4764627157772
6.373230144118536	-1176.1324048261172
6.378013058880602	-1178.7923475933876
6.3827959803787016	-1181.4562940256117
6.387578908597694	-1184.1242471308126
6.392361843522484	-1186.7962099170134
6.397144785138019	-1189.4721853922374
6.401927733429296	-1192.1521765645077
6.406710688381351	-1194.8361864418475
6.411493649979273	-1197.52421803228
6.416276618208187	-1200.216274343828
6.421059593053264	-1202.9123583845153
6.425842574499723	-1205.6124731623638
6.430625562532826	-1208.316621685397
6.435408557137876	-1211.0248069616387
6.4401915583002225	-1213.7370319991105
6.444974566005256	-1216.4532998058364
6.449757580238414	-1219.1736133898394
6.4545406009851725	-1221.8979757591417
6.459323628231054	-1224.6263899217665
6.4641066619616225	-1227.3588588857365
6.468889702162486	-1230.095385659075
6.473672748819292	-1232.835973249804
6.478455801917736	-1235.5806246659474
6.483238861443549	-1238.3293429155276
6.488021927382509	-1241.0821310065678
6.492804999720434	-1243.8389919470894
6.497588078443184	-1246.5999287451164
6.502371163536659	-1249.364944408671
6.507154254986804	-1252.1340419457758
6.511937352779603	-1254.9072243644534
6.516720456901082	-1257.684494672727
6.521503567337306	-1260.465855878619
6.5262866840743845	-1263.251310990152
6.531069807098465	-1266.0408630153486
6.5358529363957345	-1268.8345149622312
6.5406360719524255	-1271.6322698388224
6.545419213754803	-1274.4341306531446
6.5502023617891805	-1277.2401004132207
6.5549855160419055	-1280.0501821270727
6.559768676499368	-1282.864378802724
6.564551843147997	-1285.6826934481958
6.569335015974261	-1288.5051290715119
6.574118194964667	-1291.3316886806933
6.578901380105764	-1294.1623752837634
6.583684571384136	-1296.9971918887443
6.588467768786411	-1299.836141503658
6.593250972299251	-1302.679227136527
6.59803418190936	-1305.5264517953742
6.602817397603478	-1308.3778184882217
6.6076006193683865	-1311.2333302230913
6.612383847190902	-1314.0929900080055
6.617167081057881	-1316.9568008509864
6.621950320956218	-1319.8247657600566
6.626733566872844	-1322.6968877432382
6.63151681879473	-1325.5731698085528
6.636300076708882	-1328.453614964023
6.641083340602346	-1331.338226217672
6.645866610462205	-1334.22700657752
6.650649886275575	-1337.119959051591
6.655433168029614	-1340.0170866479054
6.660216455711515	-1342.9183923744863
6.664999749308507	-1345.8238792393554
6.669783048807859	-1348.733550250535
6.6745663541968705	-1351.6474084160466
6.679349665462885	-1354.565456743913
6.684132982593275	-1357.4876982421558
6.688916305575455	-1360.4141359187972
6.69369963439687	-1363.3447727818584
6.698482969045006	-1366.2796118393621
6.703266309507382	-1369.2186560993296
6.70804965577155	-1372.1619085697835
6.712833007825105	-1375.1093722587452
6.717616365655671	-1378.0610501742367
6.722399729250909	-1381.0169453242802
6.727183098598515	-1383.9770607168975
6.731966473686221	-1386.9413993601095
6.7367498545017925	-1389.9099642619385
6.74153324103303	-1392.882758430407
6.746316633267769	-1395.8597848735355
6.751100031193881	-1398.8410465993468
6.755883434799268	-1401.826546615862
6.76066684407187	-1404.8162879311033
6.765450258999658	-1407.8102735530924
6.77023367957064	-1410.808506489851
6.775017105772858	-1413.8109897493996
6.779800537594383	-1416.8177263397613
6.784583975023324	-1419.8287192689568
6.7893674180478225	-1422.8439715450081
6.794150866656055	-1425.8634861759372
6.798934320836228	-1428.887266169765
6.803717780576583	-1431.9153145345133
6.808501245865394	-1434.9476342782045
6.813284716690969	-1437.9842284088584
6.818068193041648	-1441.0250999344976
6.822851674905802	-1444.0702518631435
6.827635162271842	-1447.1196872028172
6.832418655128199	-1450.1734089615406
6.837202153463347	-1453.2314201473353
6.841985657265789	-1456.2937237682224
6.846769166524057	-1459.360322832224
6.851552681226721	-1462.43122034736
6.856336201362377	-1465.5064193216529
6.8611197269196555	-1468.585922763124
6.86590325788722	-1471.6697336797947
6.870686794253763	-1474.7578550796857
6.87547033600801	-1477.850289970819
6.880253883138719	-1480.947041361216
6.885037435634676	-1484.0481122588972
6.889820993484703	-1487.1535056718851
6.894604556677644	-1490.2632246081994
6.899388125202385	-1493.3772720758627
6.904171699047836	-1496.4956510828954
6.9089552782029395	-1499.618364637319
6.91373886265667	-1502.745415747155
6.918522452398028	-1505.8768074204243
6.923306047416049	-1509.0125426651477
6.9280896476997995	-1512.1526244893478
6.932873253238372	-1515.297055901044
6.93765686402089	-1518.445839908258
6.942440480036509	-1521.5989795190114
6.947224101274414	-1524.7564777413245
6.952007727723818	-1527.9183375832192
6.956791359373968	-1531.084562052716
6.961574996214132	-1534.255154157836
6.9663586382336184	-1537.4301169066011
6.971142285421756	-1540.6094533070311
6.975925937767907	-1543.7931663671475
6.980709595261462	-1546.9812590949716
6.985493257891842	-1550.1737344985238
6.990276925648495	-1553.3705955858254
6.9950605985209	-1556.5718453648976
6.9998442764985604	-1559.7774868437605
7.004627959571013	-1562.9875230304363
7.009411647727823	-1566.2019569329454
7.0141953409585795	-1569.4207915593079
7.018979039252906	-1572.6440299175454
7.023762742600447	-1575.8716750156786
7.028546450990885	-1579.1037298617287
7.033330164413921	-1582.3401974637159
7.03811388285929	-1585.5810808296617
7.042897606316751	-1588.8263829675864
7.0476813347760965	-1592.0761068855113
7.052465068227139	-1595.3302555914563
7.057248806659725	-1598.5888320934432
7.062032550063726	-1601.8518393994923
7.06681629842904	-1605.1192805176242
7.071600051745594	-1608.3911584558596
7.076383810003342	-1611.6674762222196
7.081167573192263	-1614.948236824725
7.085951341302369	-1618.2334432713963
7.09073511432369	-1621.5230985702533
7.09551889224629	-1624.817205729318
7.100302675060258	-1628.1157677566105
7.105086462755708	-1631.418787660151
7.109870255322785	-1634.7262684479606
7.114654052751653	-1638.03821312806
7.1194378550325075	-1641.3546247084698
7.1242216621555725	-1644.6755061972103
7.129005474111095	-1648.0008606023027
7.133789290889345	-1651.3306909317666
7.138573112480626	-1654.6650001936234
7.14335693887526	-1658.0037913958927
7.148140770063603	-1661.3470675465956
7.152924606036027	-1664.6948316537528
7.15770844678294	-1668.0470867253848
7.16249229229477	-1671.4038357695113
7.1672761425619695	-1674.7650817941542
7.172059997575017	-1678.1308278073325
7.176843857324421	-1681.5010768170673
7.18162772180071	-1684.875831831379
7.186411590994441	-1688.2550958582874
7.191195464896192	-1691.6388719058139
7.195979343496572	-1695.0271629819783
7.2007632267862105	-1698.4199720948016
7.205547114755765	-1701.817302252304
7.210331007395913	-1705.219156462505
7.215114904697363	-1708.6255377334253
7.219898806650841	-1712.0364490730858
7.2246827132471045	-1715.4518934895063
7.229466624476931	-1718.8718739907074
7.234250540331125	-1722.2963935847088
7.239034460800514	-1725.7254552795318
7.243818385875949	-1729.1590620831962
7.2486023155483075	-1732.5972170037223
7.253386249808488	-1736.0399230491296
7.258170188647414	-1739.4871832274393
7.262954132056036	-1742.9390005466712
7.2677380800253255	-1746.3953780148454
7.272522032546276	-1749.8563186399826
7.27730598960991	-1753.3218254301028
7.282089951207267	-1756.7919013932255
7.286873917329416	-1760.2665495373724
7.291657887967446	-1763.7457728705615
7.29644186311247	-1767.2295744008147
7.301225842755625	-1770.7179571361517
7.306009826888071	-1774.210924084592
7.31079381550099	-1777.708478254156
7.31557780858559	-1781.2106226528647
7.320361806133097	-1784.717360288737
7.325145808134767	-1788.2286941697937
7.329929814581871	-1791.7446273040543
7.334713825465708	-1795.2651626995391
7.339497840777598	-1798.790303364268
7.344281860508886	-1802.3200523062615
7.349065884650933	-1805.8544125335386
7.3538499131951305	-1809.3933870541205
7.358633946132888	-1812.9369788760268
7.363417983455638	-1816.4851910072769
7.368202025154835	-1820.0380264558923
7.372986071221956	-1823.5954882298906
7.3777701216485	-1827.157579337294
7.38255417642599	-1830.7243027861207
7.3873382355459665	-1834.2956615843916
7.392122298999996	-1837.8716587401268
7.3969063667796675	-1841.4522972613452
7.401690438876585	-1845.0375801560674
7.406474515282382	-1848.627510432314
7.411258595988711	-1852.2220910981032
7.416042680987243	-1855.8213251614561
7.420826770269675	-1859.4252156303917
7.425610863827722	-1863.0337655129306
7.430394961653123	-1866.6469778170922
7.435179063737636	-1870.2648555508963
7.4399631700730415	-1873.8874017223632
7.444747280651141	-1877.5146193395128
7.449531395463759	-1881.1465114103635
7.454315514502735	-1884.7830809429365
7.459099637759935	-1888.4243309452506
7.463883765227244	-1892.0702644253265
7.468667896896569	-1895.7208843911828
7.473452032759837	-1899.3761938508403
7.478236172808993	-1903.0361958123185
7.483020317036008	-1906.7008932836372
7.487804465432868	-1910.3702892728154
7.492588617991582	-1914.044386787873
7.497372774704182	-1917.7231888368303
7.5021569355627165	-1921.4066984277063
7.506941100559254	-1925.0949185685208
7.511725269685885	-1928.7878522672934
7.516509442934722	-1932.4855025320444
7.521293620297893	-1936.1878723707928
7.526077801767552	-1939.894964791559
7.530861987335865	-1943.6067828023608
7.535646176995025	-1947.32332941122
7.54043037073724	-1951.0446076261544
7.545214568554742	-1954.7706204551844
7.549998770439781	-1958.5013709063298
7.554782976384623	-1962.2368619876092
7.5595671863815594	-1965.9770967070438
7.564351400422898	-1969.722078072652
7.569135618500967	-1973.4718090924532
7.573919840608111	-1977.2262927744675
7.578704066736702	-1980.985532126714
7.583488296879119	-1984.7495301572121
7.58827253102777	-1988.5182898739815
7.593056769175081	-1992.2918142850417
7.597841011313492	-1996.0701063984125
7.602625257435468	-1999.8531692221134
7.607409507533488	-2003.6410057641629
7.612193761600052	-2007.433619032581
7.61697801962768	-2011.231012035387
7.621762281608909	-2015.0331877806009
7.626546547536297	-2018.8401492762414
7.631330817402416	-2022.651899530328
7.636115091199863	-2026.468441550881
7.640899368921249	-2030.2897783459184
7.645683650559206	-2034.115912923461
7.650467936106379	-2037.9468482915272
7.65525222555544	-2041.7825874581367
7.660036518899074	-2045.6231334313084
7.664820816129983	-2049.468489219062
7.669605117240892	-2053.318657829417
7.674389422224542	-2057.173642270394
7.679173731073687	-2061.0334455500083
7.683958043781109	-2064.8980706762827
7.688742360339599	-2068.7675206572358
7.6935266807419715	-2072.6417985008866
7.698311004981055	-2076.5209072152543
7.703095333049702	-2080.4048498083584
7.7078796649407755	-2084.2936292882187
7.712664000647157	-2088.1872486628517
7.717448340161752	-2092.0857109402805
7.722232683477477	-2095.9890191285226
7.7270170305872705	-2099.8971762355977
7.731801381484084	-2103.810185269523
7.736585736160892	-2107.7280492383193
7.74137009461068	-2111.6507711500058
7.746154456826456	-2115.578354012603
7.750938822801245	-2119.5108008341276
7.755723192528083	-2123.4481146225994
7.760507566000033	-2127.39029838604
7.765291943210165	-2131.337355132464
7.770076324151575	-2135.2892878698954
7.7748607088173705	-2139.2460996063487
7.779645097200678	-2143.207793349847
7.78442948929464	-2147.174372108408
7.789213885092414	-2151.1458388900496
7.79399828458718	-2155.1221967027927
7.7987826877721265	-2159.1034485546543
7.80356709464047	-2163.089597453656
7.808351505185432	-2167.0806464078155
7.813135919400259	-2171.076598425152
7.817920337278207	-2175.0774565136835
7.822704758812557	-2179.083223681432
7.827489183996597	-2183.093902936415
7.832273612823637	-2187.109497286649
7.837058045287006	-2191.1300097401563
7.84184248138004	-2195.1554433049546
7.846626921096102	-2199.1858009890643
7.851411364428563	-2203.2210858005014
7.8561958113708155	-2207.261300747289
7.860980261916264	-2211.3064488374416
7.865764716058332	-2215.3565330789825
7.870549173790458	-2219.411556479928
7.875333635106093	-2223.4715220482963
7.880118099998713	-2227.5364327921093
7.884902568461799	-2231.606291719383
7.889687040488857	-2235.68110183814
7.894471516073401	-2239.7608661563936
7.899255995208968	-2243.8455876821686
7.904040477889105	-2247.9352694234817
7.9088249641073745	-2252.0299143883494
7.913609453857362	-2256.1295255847945
7.918393947132658	-2260.2341060208314
7.923178443926877	-2264.3436587044853
7.927962944233642	-2268.458186643769
7.932747448046601	-2272.577692846705
7.937531955359406	-2276.7021803213092
7.942316466165733	-2280.8316520756043
7.947100980459268	-2284.9661111176065
7.951885498233712	-2289.1055604553335
7.956670019482789	-2293.2500030968076
7.961454544200225	-2297.399442050045
7.966239072379776	-2301.553880323066
7.9710236040152	-2305.7133209238873
7.975808139100278	-2309.8777668605308
7.980592677628801	-2314.047221141012
7.98537721959458	-2318.221686773353
7.990161764991436	-2322.4011667655705
7.994946313813205	-2326.585664125682
7.999730866053745	-2330.7751818617103
8.004515421706918	-2334.9697229816697
8.00929998076661	-2339.1692904935826
8.014084543226712	-2343.3738874054643
8.018869109081143	-2347.583516725337
8.023653678323818	-2351.798181461218
8.028438250948687	-2356.0178846211243
8.033222826949702	-2360.242629213077
8.038007406320826	-2364.4724182450936
8.04279198905605	-2368.7072547251937
8.047576575149366	-2372.947141661394
8.052361164594792	-2377.192082061716
8.057145757386346	-2381.4420789341757
8.061930353518076	-2385.697135286795
8.06671495298403	-2389.9572541275893
8.07149955577828	-2394.222438464578
8.07628416189491	-2398.4926913057807
8.081068771328011	-2402.768015659215
8.0858533840717	-2407.0484145329015
8.090638000120098	-2411.333890934856
8.095422619467344	-2415.6244478731
8.100207242107588	-2419.9200883556487
8.104991868035	-2424.220815390524
8.10977649724376	-2428.5266319857437
8.114561129728058	-2432.837541149324
8.1193457654821	-2437.153545889287
8.124130404500113	-2441.4746492136483
8.128915046776326	-2445.800854130428
8.133699692304988	-2450.132163647644
8.138484341080366	-2454.4685807733167
8.14326899309673	-2458.810108515463
8.148053648348368	-2463.1567498821
8.152838306829583	-2467.50850788125
8.157622968534689	-2471.865385520927
8.16240763345802	-2476.227385809153
8.167192301593909	-2480.594511753946
8.171976972936722	-2484.966766363323
8.176761647480816	-2489.344152645303
8.181546325220584	-2493.726673607907
8.186331006150414	-2498.11433225915
8.191115690264713	-2502.507131607051
8.195900377557905	-2506.905074659631
8.20068506802442	-2511.3081644249046
8.20546976165871	-2515.716403910895
8.210254458455232	-2520.129796125616
8.215039158408457	-2524.5483440770895
8.219823861512875	-2528.9720507733327
8.224608567762981	-2533.4009192223625
8.229393277153287	-2537.8349524321998
8.234177989678317	-2542.2741534108613
8.23896270533261	-2546.7185251663664
8.243747424110712	-2551.1680707067335
8.248532146007186	-2555.62279303998
8.253316871016608	-2560.0826951741246
8.258101599133564	-2564.547780117187
8.262886330352655	-2569.0180508771846
8.267671064668493	-2573.4935104621345
8.272455802075699	-2577.9741618800576
8.277240542568917	-2582.4600081389694
8.28202528614279	-2586.951052246892
8.286810032791985	-2591.4472972118397
8.291594782511176	-2595.948746041834
8.296379535295042	-2600.455401744891
8.301164291138292	-2604.967267329031
8.30594905003563	-2609.4843458022715
8.310733811981784	-2614.006640172629
8.315518576971488	-2618.534153448125
8.320303344999486	-2623.066888636775
8.325088116060542	-2627.6048487465996
8.329872890149424	-2632.148036785615
8.334657667260919	-2636.696455761841
8.33944244738982	-2641.2501086832967
8.344227230530933	-2645.8089985579973
8.349012016679087	-2650.373128393963
8.353796805829099	-2654.9425011992107
8.358581597975821	-2659.5171199817623
8.363366393114104	-2664.0969877496323
8.368151191238821	-2668.682107510841
8.372935992344845	-2673.272482273404
8.377720796427067	-2677.868115045343
8.382505603480391	-2682.4690088346747
8.387290413499723	-2687.075166649416
8.39207522648	-2691.686591497588
8.39686004241615	-2696.303286387205
8.401644861303124	-2700.9252543262896
8.40642968313588	-2705.5524983228556
8.41121450790939	-2710.185021384926
8.415999335618634	-2714.8228265205144
8.420784166258615	-2719.465916737642
8.425568999824328	-2724.114295044327
8.430353836310795	-2728.767964448584
8.435138675713041	-2733.426927958435
8.439923518026108	-2738.0911885818955
8.444708363245049	-2742.760749326987
8.449493211364917	-2747.4356132017238
8.454278062380792	-2752.115783214128
8.459062916287756	-2756.8012623722143
8.463847773080905	-2761.492053684001
8.468632632755345	-2766.188160157509
8.473417495306188	-2770.8895848007533
8.478202360728575	-2775.596330621754
8.482987229017631	-2780.308400628529
8.487772100168518	-2785.025797829096
8.492556974176388	-2789.7485252314723
8.49734185103642	-2794.4765858436776
8.502126730743795	-2799.2099826737294
8.506911613293703	-2803.948718729644
8.511696498681353	-2808.692797019443
8.516481386901956	-2813.4422205511405
8.521266277950748	-2818.196992332758
8.526051171822955	-2822.957115372311
8.530836068513828	-2827.72259267782
8.535620968018629	-2832.4934272573005
8.54040587033262	-2837.2696221187725
8.545190775451088	-2842.0511802702536
8.549975683369318	-2846.83810471976
8.554760594082612	-2851.630398475312
8.55954550758628	-2856.4280645449253
8.564330423875646	-2861.2311059366225
8.569115342946041	-2866.0395256584147
8.573900264792808	-2870.8533267183266
8.578685189411297	-2875.672512124373
8.583470116796873	-2880.4970848845705
8.58825504694491	-2885.32704800694
8.593039979850792	-2890.1624044994974
8.59782491550991	-2895.0031573702627
8.602609853917674	-2899.849309627251
8.607394795069494	-2904.7008642784836
8.612179738960796	-2909.557824331975
8.616964685587016	-2914.4201927957465
8.6217496349436	-2919.287972677814
8.626534587025997	-2924.161166986195
8.631319541829681	-2929.0397787289094
8.636104499350122	-2933.923810913973
8.640889459582805	-2938.8132665494063
8.645674422523227	-2943.7081486432235
8.650459388166896	-2948.608460203447
8.65524435650932	-2953.5142042380903
8.66002932754603	-2958.4253837551755
8.664814301272562	-2963.3420017627177
8.669599277684453	-2968.2640612687346
8.67438425677727	-2973.191565281246
8.679169238546566	-2978.124516808267
8.683954222987921	-2983.06291885782
8.688739210096918	-2988.0067744379176
8.69352419986915	-2992.9560865565822
8.698309192300224	-2997.910858221829
8.703094187385748	-3002.8710924416755
8.707879185121348	-3007.836792224142
8.712664185502655	-3012.8079605772427
8.717449188525311	-3017.7846005089996
8.72223419418497	-3022.766715027427
8.727019202477294	-3027.754307140546
8.731804213397947	-3032.7473798563715
8.736589226942614	-3037.7459361829233
8.741374243106986	-3042.7499791282194
8.746159261886756	-3047.759511700274
8.750944283277638	-3052.7745369071095
8.755729307275347	-3057.795057756741
8.760514333875614	-3062.8210772571874
8.765299363074169	-3067.8525984164667
8.770084394866764	-3072.889624242596
8.774869429249147	-3077.932157743592
8.77965446621709	-3082.9802019274753
8.784439505766366	-3088.0337598022625
8.789224547892752	-3093.092834375968
8.794009592592044	-3098.157428656616
8.79879463986004	-3103.2275456522175
8.803579689692556	-3108.3031883707963
8.808364742085406	-3113.3843598203657
8.813149797034418	-3118.4710630089457
8.817934854535435	-3123.563300944555
8.822719914584297	-3128.6610766352073
8.827504977176865	-3133.764393088924
8.832290042309001	-3138.8732533137213
8.837075109976578	-3143.987660317618
8.841860180175479	-3149.10761710863
8.846645252901594	-3154.2331266947776
8.851430328150824	-3159.364192084075
8.856215405919082	-3164.5008162845443
8.86100048620228	-3169.6430023042
8.865785568996348	-3174.790753151059
8.87057065429722	-3179.9440718331434
8.87535574210084	-3185.102961358465
8.880140832403162	-3190.2674247350474
8.884925925200148	-3195.437464970903
8.88971102048777	-3200.613085074054
8.894496118262	-3205.7942880525143
8.899281218518835	-3210.981076914305
8.904066321254266	-3216.1734546674415
8.908851426464299	-3221.3714243199406
8.913636534144949	-3226.574988879823
8.918421644292234	-3231.784151355103
8.92320675690219	-3236.9989147538017
8.92799187197085	-3242.219282083933
8.932776989494268	-3247.4452563535187
8.9375621094685	-3252.676840570574
8.9423472318896	-3257.914037743114
8.947132356753656	-3263.156850879162
8.951917484056736	-3268.4052829867305
8.956702613794942	-3273.6593370738406
8.961487745964362	-3278.9190161485076
8.966272880561108	-3284.1843232187516
8.971058017581292	-3289.455261292586
8.975843157021039	-3294.7318333780336
8.98062829887648	-3300.0140424831093
8.985413443143752	-3305.301891615829
8.990198589819006	-3310.595383784214
8.994983738898396	-3315.8945219962784
8.999768890378087	-3321.1993092600424
9.00455404425425	-3326.5097485835213
9.009339200523067	-3331.825842974735
9.014124359180725	-3337.147595441699
9.018909520223426	-3342.475008992433
9.023694683647365	-3347.8080866349537
9.028479849448761	-3353.1468313772757
9.033265017623835	-3358.491246227422
9.038050188168814	-3363.841334193405
9.042835361079936	-3369.1970982832463
9.047620536353442	-3374.55854150496
9.052405713985591	-3379.925666866567
9.057190893972637	-3385.298477376083
9.061976076310852	-3390.6769760415236
9.066761260996515	-3396.0611658709104
9.071546448025904	-3401.451049872256
9.076331637395315	-3406.846631053584
9.081116829101044	-3412.2479124229058
9.085902023139406	-3417.6548969882438
9.090687219506709	-3423.067587757612
9.09547241819928	-3428.48598773903
9.100257619213453	-3433.9100999405155
9.105042822545556	-3439.339927370083
9.109828028191947	-3444.7754730357533
9.114613236148973	-3450.216739945541
9.119398446412998	-3455.6637311074674
9.124183658980389	-3461.1164495295466
9.128968873847528	-3466.5748982197983
9.133754091010795	-3472.0390801862363
9.138539310466582	-3477.508998436883
9.143324532211293	-3482.984655979753
9.148109756241329	-3488.466055822863
9.15289498255311	-3493.953200974233
9.157680211143054	-3499.446094441877
9.162465442007596	-3504.9447392338175
9.167250675143167	-3510.449138358066
9.172035910546215	-3515.9592948226446
9.176821148213193	-3521.47521163557
9.181606388140557	-3526.9968918048553
9.186391630324774	-3532.524338338524
9.19117687476232	-3538.0575542445886
9.195962121449677	-3543.59654253107
9.20074737038333	-3549.1413062059833
9.205532621559781	-3554.691848277348
9.210317874975525	-3560.248171753179
9.215103130627082	-3565.8102796414964
9.219888388510967	-3571.378174950316
9.224673648623696	-3576.951860687654
9.229458910961815	-3582.5313398615303
9.234244175521853	-3588.11661547996
9.239029442300364	-3593.707690550963
9.243814711293897	-3599.3045680825535
9.248599982499014	-3604.9072510827523
9.253385255912283	-3610.515742559574
9.258170531530281	-3616.130045521038
9.26295580934959	-3621.750162975161
9.267741089366794	-3627.376097929958
9.272526371578497	-3633.00785339345
9.277311655981297	-3638.6454323736507
9.282096942571807	-3644.288837878583
9.286882231346642	-3649.9380729162567
9.291667522302426	-3655.593140494696
9.296452815435796	-3661.2540436219156
9.301238110743384	-3666.9207853059306
9.306023408221835	-3672.593368554761
9.310808707867807	-3678.2717963764226
9.315594009677952	-3683.9560717789354
9.320379313648939	-3689.646197770313
9.325164619777443	-3695.342177358576
9.329949928060136	-3701.044013551739
9.334735238493714	-3706.7517093578213
9.33952055107486	-3712.4652677848403
9.344305865800283	-3718.18469184081
9.349091182666685	-3723.909984533752
9.353876501670776	-3729.64114887168
9.358661822809282	-3735.378187862615
9.363447146078924	-3741.121104514571
9.368232471476443	-3746.8699018355674
9.373017798998571	-3752.6245828336187
9.37780312864206	-3758.3851505167454
9.382588460403664	-3764.151607892965
9.387373794280135	-3769.9239579702903
9.392159130268253	-3775.702203756743
9.396944468364776	-3781.4863482603373
9.401729808566495	-3787.276394489095
9.406515150870193	-3793.0723454510266
9.41130049527266	-3798.8742041541554
9.416085841770702	-3804.6819736064963
9.420871190361114	-3810.4956568160646
9.42565654104072	-3816.315256790882
9.430441893806332	-3822.1407765389604
9.435227248654778	-3827.972219068322
9.440012605582886	-3833.8095873869797
9.4447979645875	-3839.6528845029557
9.44958332566546	-3845.502113424261
9.45436868881362	-3851.3572771589193
9.459154054028835	-3857.2183787149434
9.463939421307968	-3863.0854211003507
9.46872479064789	-3868.958407323161
9.473510162045478	-3874.837340391388
9.478295535497615	-3880.7222233130524
9.483080911001188	-3886.6130590961693
9.487866288553095	-3892.509850748757
9.492651668150232	-3898.412601278831
9.497437049789514	-3904.321313694411
9.50222243346785	-3910.2359910035134
9.507007819182164	-3916.1566362141516
9.51179320692938	-3922.083252334349
9.516578596706426	-3928.0158423721177
9.521363988510249	-3933.9544093354793
9.526149382337787	-3939.8989562324446
9.530934778185998	-3945.8494860710384
9.535720176051834	-3951.8060018592732
9.540505575932256	-3957.768506605165
9.54529097782424	-3963.737003316736
9.550076381724756	-3969.7114950019973
9.55486178763079	-3975.6919846689725
9.559647195539327	-3981.6784753256725
9.564432605447358	-3987.6709699801195
9.569218017351886	-3993.669471640326
9.574003431249915	-3999.673983314314
9.57878884713846	-4005.6845080100984
[truncated: 8,000 more rows]
