# Supplementary material for: Critical Phenomena of Charged AdS Black Holes in Rastall Gravity
Source: Hindawi journal article supplement (doi:10.1155/2020/4065254), 2020-01-24
Supplement: f1 [file 4065254.f1.zip › Fig3(c)-GT.dat]

2716.6565743444135	-1.6683927864725618
213.31670440737093	-0.37269949488221044
43.483591687201	-0.07535953606838332
13.093589183792801	0.03467799569175578
4.913157098856189	0.08474324519732737
2.158811731159439	0.11021122750868174
1.0956250663907952	0.12403116292238676
0.6483082894798962	0.13180332563247693
0.45015561888885713	0.13623675613824185
0.3603394835091134	0.13875081181264426
0.31991190718555806	0.1401342268811742
0.30259258458277927	0.14084502459766657
0.29612459631095067	0.14115801955917268
0.2946198105583866	0.1412419855459004
0.29520938197220925	0.14120210648559486
0.29650149526566194	0.1411043189565699
0.29784185481346404	0.1409897639883161
0.2989476864565188	0.14088362195016244
0.2997222930447345	0.14080064950203197
0.3001596425604338	0.14074872371091046
0.3002949714446511	0.1407311515379115
0.3001793454023114	0.14074819760385937
0.2998668458866782	0.14079810749064178
0.29940844314659376	0.1408778000347849
0.29884939548583983	0.14098333924721743
0.2982284760104608	0.14111025765003626
0.2975781099211593	0.14125377833802583
0.29692492896054307	0.1414089673706934
0.2962904810913611	0.14157083787089508
0.2956919604621535	0.14173442044604084
0.29514289222574946	0.14189481002255505
0.2946537444311923	0.14204719611923594
0.2942324591453275	0.14218688148701886
0.29388490505213716	0.14230929259251007
0.2936152584446501	0.14240998441166863
0.29342632125375157	0.14248464128968397
0.29331978495034117	0.14252907512055532
0.29329644859495585	0.14253922174217912
0.29335639842404154	0.14251113618680808
0.2934991553866293	0.14244098724281717
0.29372379609822374	0.14232505165106094
0.2940290518158059	0.1421597081632063
0.29441338927975125	0.14194143161997336
0.2948750766174876	0.14166678715691386
0.2954122369530262	0.14133242460895065
0.29602289190531755	0.14093507315862527
0.29670499677479667	0.14047153625412112
0.2974564688999237	0.13993868680966548
0.2982752104034403	0.1393334626914119
0.2991591263322009	0.13865286248530595
0.3001061390168567	0.1378939415389633
0.30111419933167244	0.13705380826666327
0.30218129541474176	0.13612962070475798
0.30330545931020014	0.13511858330381082
0.30448477191288376	0.13401794394336788
0.30571736652910153	0.1328249911552657
0.3070014313121974	0.13153705154166556
0.30833521078626003	0.13015148737447507
0.30971700663396406	0.12866569436341777
0.3111451778936782	0.12707709958067842
0.3126181406854925	0.12538315953075918
0.3141343675647568	0.12358135835489752
0.3156923865842941	0.1216692061601076
0.3172907801320348	0.11964423746359891
0.3189281835988725	0.11750400974398596
0.3206032839216468	0.11524610209133833
0.32231481803796136	0.11286811394870998
0.3240615712827445	0.11036766393835065
0.32584237575082925	0.10774238876631816
0.32765610864516015	0.10498994219969926
0.3295016906263657	0.10210799411109417
0.3313780841762348	0.09909422958543736
0.3332842919849857	0.09594634808461094
0.33521935537002867	0.09266206266566156
0.3371823527321171	0.0892390992487593
0.33917239805329846	0.08567519593133664
0.34118863943985106	0.08196810234512308
0.34323025771239835	0.07811557905304453
0.3452964650445722	0.0741153969831913
0.34738650365093837	0.06996533689727258
0.3494996445243594	0.06566318889117274
0.3516351862225443	0.061206751925407005
0.353792453703191	0.056593833383439096
0.35597079720686264	0.051822248655979175
0.35816959118653013	0.04688982074951768
0.3603882332825566	0.041794379917484165
0.362626143341784	0.036533763312536244
0.3648827624793005	0.031105814658594827
0.3671575521814133	0.025508383941342
0.36944999344831925	0.019739327115992675
0.37175958597495506	0.013796505831232805
0.3740858473685083	0.00767778716830099
0.3764283124010872	0.001381043394257861
0.37878653229606707	-0.005095848271440412
0.3811600740466661	-0.01175500587789037
0.383548519765335	-0.018598542951977756
0.3859514660625906	-0.025628568696615034
0.3883685234539611	-0.03284718817864761
0.3907993157937627	-0.04025650250704596
0.39324347973446844	-0.047858609001964175
0.3957006642104827	-0.05565560135520302
0.39817052994517893	-0.06364956978258259
0.4006527489801068	-0.07184260116869329
0.40314700422532335	-0.08023677920446633
0.4056529890298461	-0.08883418451797441
0.40817040677127253	-0.09763689479884673
0.41069897046365395	-0.10664698491665862
0.41323840238275344	-0.11586652703363377
0.4157884337078588	-0.12529759071197233
0.418348804179361	-0.13494224301610455
0.420919261771346	-0.14480254861014358
0.423499562378484	-0.15488056985080179
0.4260894695165368	-0.16517836687601156
0.4286887540358335	-0.17569799768948252
0.4312971938471013	-0.1864415182414106
0.43391457365906455	-0.19741098250554018
0.4365406847272565	-0.2086084425527716
0.4391753246135149	-0.22003594862149428
0.4418182969556589	-0.2316955491848096
0.4444694112468697	-0.24358929101481008
0.4471284826243221	-0.25571921924405705
0.449795331666635	-0.26808737742440325
0.4524697841997311	-0.28069580758329143
0.45515167111071797	-0.29354655027765436
0.4578408281694188	-0.3066416446455347
0.46053709585720276	-0.3199831284555377
0.4632403192027801	-0.33357303815422135
0.4659503476246447	-0.34741340891152384
0.4686670347798624	-0.36150627466432245
0.4713902384189177	-0.3758536681582141
0.47411982024634647	-0.39045762098760056
0.47685564578689515	-0.4053201636341592
0.4795975842569588	-0.420443325503774
0.4823455084410649	-0.43582913496199854
0.48509929457317813	-0.4514796193681191
0.4878588222226145	-0.46739680510788234
0.49062397418436204	-0.4835827176249465
0.49339463637361614	-0.5000393814511173
0.4961706977243462	-0.516768820235419
0.49895205009171845	-0.5337730567720567
0.5017385881582106	-0.551054113027316
0.5045302093432573	-0.5686140101654482
0.5073268137162785	-0.5864547685735874
0.5101283039129453	-0.6045784078857367
0.5129345850545469	-0.6229869470058684
0.5157455646703285	-0.6416824041301753
0.518561152622675	-0.6606667967685084
0.5213812610350227	-0.6799421417650346
0.5242058042223853	-0.6995104553181517
0.5270346986243865	-0.7193737529996856
0.5298678627406954	-0.7395340497734063
0.5327052170687694	-0.7599933600128844
0.5355466840438052	-0.780753697518721
0.5383921879808146	-0.8018170755351743
0.5412416550187351	-0.8231855067662046
0.5440950130664958	-0.8448610033909669
0.5469521917509595	-0.8668455770787703
0.5498131223666671	-0.889141239003524
0.5526777378273131	-0.9117499998576934
0.555545972618883	-0.934673869865785
0.558417762754389	-0.957914858797376
0.5612930457301409	-0.9814749759797107
0.5641717604834924	-1.0053562303098758
0.5670538473520061	-1.0295606302665776
0.5699392480339837	-1.0540901839215262
0.5728279055503068	-1.0789468989504531
0.5757197642075412	-1.1041327826437681
0.5786147695622545	-1.1296498419168728
0.581512868386503	-1.1555000833201425
0.5844140086344425	-1.1816855130485877
0.5873181394100229	-1.2082081369512114
0.5902252109357234	-1.235069960540068
0.5931351745222943	-1.2622729889990376
0.5960479825394625	-1.289819227192329
0.5989635883875709	-1.317710679672713
0.6018819464701144	-1.3459493506895053
0.6048030121671403	-1.374537244196302
0.607726741809483	-1.403476363858477
0.6106530926538022	-1.4327687130604545
0.6135820228583955	-1.462416294912758
0.6165134914597586	-1.4924211122588456
0.6194474583498661	-1.5227851676817479
0.6223838842541477	-1.553510463510496
0.6253227307101341	-1.5845990018263703
0.6282639600467526	-1.6160527844689574
0.6312075353642438	-1.647873813042031
0.6341534205146856	-1.6800640889192628
0.637101580083096	-1.7126256132497624
0.6400519793690995	-1.7455603869634633
0.643004584369137	-1.7788704107763502
0.6459593617591989	-1.8125576851955343
0.6489162788780657	-1.8466242105241877
0.6518753037110384	-1.8810719868663353
0.6548364048741413	-1.9159030141315179
0.6577995515987826	-1.9511192920393083
0.6607647137168564	-1.9867228201237215
0.6637318616462734	-2.0227155977374873
0.6667009663769027	-2.0590996240562074
0.6696719994569158	-2.095876898082406
0.672644932979515	-2.1330494186494566
0.6756197395700374	-2.1706191844254117
0.6785963923734193	-2.2085881939167247
0.6815748650420114	-2.246958445471867
0.6845551317237338	-2.2857319372848584
0.6875371670505568	-2.3249106673986883
0.690520946127301	-2.364496633708657
0.6935064445207451	-2.4044918339656314
0.6964936382490289	-2.4448982657791904
0.6994825037713481	-2.4857179266207265
0.7024730179779254	-2.5269528138264232
0.7054651581802538	-2.5686049246001956
0.7084589021016015	-2.6106762560165175
0.7114542278677715	-2.653168805023207
0.7144511139981051	-2.696084568444117
0.717449539396728	-2.7394255429817704
0.7204494833440229	-2.783193725219921
0.7234509254883312	-2.8273911116260564
0.7264538458378675	-2.872019698553824
0.7294582247528489	-2.91708148224542
0.7324640429378259	-2.9625784588338853
0.7354712814342141	-3.008512624345381
0.7384799216130158	-3.0548859747013677
0.741489945167731	-3.1017005057207765
0.7445013341074472	-3.1489582131220755
0.7475140707501071	-3.1966610925253365
0.750528137715945	-3.244811139454203
0.7535435179210906	-3.2934103493378584
0.756560194571333	-3.342460717512896
0.7595781511560403	-3.391964239225192
0.7625973714422322	-3.4419229096316926
0.7656178394687978	-3.4923387238021997
0.7686395395408594	-3.5432136767210607
0.7716624562242722	-3.594549763288875
0.7746865743402619	-3.6463489783241294
0.7777118789601899	-3.6986133165647788
0.7807383554004503	-3.75134477266984
0.7837659892174875	-3.8045453412208925
0.7867947662029354	-3.8582170167235925
0.7898246723788734	-3.9123617936091106
0.7928556939931971	-3.9669816662355752
0.7958878175150974	-4.02207862888944
0.7989210296306507	-4.0776546757868655
0.8019553172385095	-4.133711801075028
0.8049906674456989	-4.190251998833435
0.808027067563508	-4.247277263075176
0.8110645051034819	-4.304789587748181
0.8141029677735032	-4.36279096673641
0.8171424434739677	-4.4212833938610645
0.820182920294047	-4.480268862881715
0.823224386508039	-4.539749367497465
0.8262668305717997	-4.59972690134803
0.8293102411192604	-4.660203458014853
0.8323546069590214	-4.721181031022121
0.8353999170710248	-4.78266161383785
0.8384461606033023	-4.844647199874855
0.8414933268687965	-4.907139782491773
0.8445414053422534	-4.97014135499401
0.8475903856571855	-5.033653910634716
0.8506402576029023	-5.097679442615688
0.8536910111216055	-5.162219944088295
0.8567426363055525	-5.22727740815436
0.8597951233942769	-5.292853827867034
0.8628484627718764	-5.358951196231654
0.865902644964355	-5.425571506206562
0.8689576606370274	-5.492716750703945
0.8720135005919764	-5.560388922590603
0.8750701557655687	-5.628590014688769
0.8781276172260221	-5.697322019776843
0.8811858761710267	-5.76658693059017
0.8842449239254168	-5.836386739821747
0.887304751938891	-5.906723440122977
0.890365351783785	-5.9775990241043395
0.8934267151528869	-6.049015484336113
0.896488833857302	-6.1209748133490285
0.8995516998243628	-6.19347900363495
0.9026153050955802	-6.266530047647506
0.905679641824641	-6.340129937802755
0.9087447022754455	-6.414280666479771
0.9118104788201856	-6.488984226021296
0.9148769639374643	-6.5642426087343
0.9179441502104534	-6.6400578068906135
0.921012030325088	-6.71643181272745
0.9240805970683011	-6.79336661844802
0.9271498433262911	-6.87086421622206
0.9302197620828263	-6.948926598186366
0.9332903464175848	-7.027555756445355
0.9363615895045253	-7.106753683071557
0.9394334846102946	-7.186522370106151
0.9425060250926635	-7.2668638095594424
0.9455792043989963	-7.347779993411385
0.9486530160647514	-7.429272913612024
0.9517274537120093	-7.511344562082016
0.9548025110480328	-7.593996930713053
0.9578781818638537	-7.677232011368343
0.9609544600328881	-7.7610517958830405
0.96403133950958	-7.845458276064702
0.9671088143280693	-7.930453443693695
0.9701868786008877	-8.01603929052365
0.9732655265176804	-8.102217808281836
0.9763447523439501	-8.188990988669605
0.9794245504198282	-8.276360823362763
0.9825049151588691	-8.364329304011978
0.9855858410468651	-8.452898422243155
0.988667322640689	-8.542070169657826
0.9917493545671535	-8.631846537833491
0.9948319315218974	-8.722229518324031
0.9979150482682879	-8.813221102660009
1.0009986996363491	-8.90482328234907
1.0040828805217057	-8.99703804887624
1.0071675858845506	-9.089867393704303
1.0102528107486293	-9.183313308274114
1.013338550200245	-9.277377784004917
1.0164247993872808	-9.372062812294693
1.0195115535182422	-9.467370384520436
1.0225988078613142	-9.563302492038499
1.02568655774344	-9.659861126184866
1.028774798549412	-9.757048278275482
1.0318635257209845	-9.854865939606503
1.0349527347559986	-9.953316101454647
1.038042421207524	-10.052400755077386
1.0411325806830198	-10.152121891713326
1.0442232088435053	-10.252481502582393
1.0473143014027497	-10.353481578886164
1.0504058541264742	-10.455124111808072
1.0534978628315714	-10.557411092513735
1.0565903233853344	-10.66034451215114
1.0596832317047036	-10.763926361850938
1.0627765837555254	-10.86815863272667
1.0658703755518228	-10.973043315875032
1.068964603155083	-11.078582402376068
1.0720592626735517	-11.184777883293453
1.0751543502615457	-11.291631749674686
1.0782498621187733	-11.39914599255134
1.0813457944896703	-11.507322602939265
1.084442143662743	-11.616163571838815
1.0875389059699272	-11.725670890235076
1.0906360777859565	-11.83584654909804
1.0937336555277408	-11.94669253938285
1.0968316356537564	-12.058210852029983
1.0999300146634476	-12.170403477965465
1.1030287890966353	-12.283272408101041
1.106127955532941	-12.396819633334408
1.1092275105912148	-12.511047144549371
1.1123274509289784	-12.625956932616058
1.1154277732418734	-12.74155098839107
1.1185284742631212	-12.857831302717722
1.1216295507629932	-12.974799866426135
1.1247309995482855	-13.092458670333507
1.127832817461808	-13.210809705244197
1.1309350013818773	-13.329854961949984
1.1340375482218215	-13.449596431230148
1.1371404549294921	-13.570036103851699
1.1402437184867817	-13.691175970569507
1.1433473359091548	-13.813018022126473
1.1464513042451812	-13.935564249253671
1.1495556205760808	-14.058816642670541
1.1526602820152732	-14.182777193084984
1.1557652857079372	-14.307447891193567
1.1588706288305746	-14.432830727681631
1.1619763085905848	-14.55892769322345
1.1650823222258426	-14.685740778482403
1.1681886670042854	-14.813271974111043
1.171295340223506	-14.94152327075131
1.1744023392103524	-15.07049665903462
1.177509661320534	-15.200194129582034
1.180617303938233	-15.330617673004348
1.1837252644757255	-15.461769279902263
1.1868335403730028	-15.593650940866494
1.1899421290974044	-15.726264646477896
1.1930510281432551	-15.859612387307584
1.1961602350315053	-15.993696153917096
1.1992697473093807	-16.128517936858422
1.202379562550035	-16.264079726674233
1.2054896783522095	-16.40038351389793
1.2086000923398972	-16.537431289053753
1.2117108021620122	-16.675225042656947
1.2148218054920652	-16.813766765213842
1.2179331000278428	-16.95305844722192
1.2210446834910922	-17.093102079170027
1.224156553627212	-17.23389965153838
1.2272687082049458	-17.37545315479873
1.230381145016081	-17.51776457941444
1.233493861875155	-17.6608359158406
1.2366068566191595	-17.804669154524113
1.2397201271072578	-17.94926628590382
1.2428336712205004	-18.094629300410578
1.2459474868615448	-18.240760188467345
1.2490615719543845	-18.38766094048931
1.2521759244440755	-18.535333546883948
1.2552905422964742	-18.683779998051147
1.2584054234979718	-18.833002284383266
1.2615205660552389	-18.98300239626526
1.26463596799497	-19.133782324074733
1.2677516273636338	-19.285344058182055
1.2708675422272269	-19.43768958895041
1.2739837106710294	-19.59082090673594
1.2771001307993672	-19.74474000188776
1.2802168007353762	-19.899448864748095
1.2833337186207683	-20.054949485652322
1.2864508826156054	-20.211243854929087
1.2895682908980703	-20.368333962900337
1.2926859416642489	-20.52622179988145
1.2958038331279074	-20.684909356181286
1.2989219635202778	-20.84439862210221
1.3020403310898472	-21.004691587940297
1.305158934102146	-21.165790243985267
1.3082777708395426	-21.327696580520662
1.3113968396010387	-21.49041258782382
1.314516138702071	-21.653940256166038
1.317635666474312	-21.8182815758126
1.3207554212654753	-21.983438537022813
1.3238754014391236	-22.149413130050167
1.326995605374481	-22.316207345142274
1.3301160314662435	-22.48382317254105
1.3332366781243978	-22.652262602482715
1.3363575437740394	-22.821527625197888
1.3394786268551924	-22.991620230911604
1.3425999258226358	-23.16254240984344
1.3457214391457268	-23.334296152207525
1.3488431653082333	-23.506883448212648
1.351965102808161	-23.680306288062248
1.3550872501575901	-23.85456666195454
1.3582096058825095	-24.029666560082553
1.3613321685226554	-24.205607972634187
1.364454936631352	-24.38239288979221
1.367577908775353	-24.56002330173443
1.3707010835346882	-24.73850119863368
1.3738244595025084	-24.917828570657868
1.3769480352849361	-25.098007407970016
1.3800718095009148	-25.279039700728394
1.3831957807820647	-25.460927439086483
1.3863199477725359	-25.643672613193086
1.3894443091288655	-25.827277213192318
1.3925688635198377	-26.011743229223725
1.3956936096263444	-26.197072651422292
1.3988185461412481	-26.383267469918522
1.4019436717692462	-26.57032967483842
1.4050689852267384	-26.758261256303616
1.4081944852416943	-26.947064204431374
1.411320170553524	-27.13674050933465
1.4144460399129508	-27.32729216112215
1.4175720920818813	-27.518721149898294
1.4206983258332857	-27.71102946576338
1.4238247399510715	-27.90421909881358
1.4269513332299633	-28.098292039140954
1.4300781044753808	-28.293250276833504
1.4332050525033246	-28.489095801975232
1.4363321761402563	-28.685830604646217
1.4394594742229845	-28.8834566749226
1.4425869455985505	-29.081976002876576
1.4457145891241177	-29.281390578576598
1.4488424036668597	-29.481702392087264
1.451970388103851	-29.682913433469455
1.4550985413219601	-29.885025692780246
1.4582268622177426	-30.088041160073125
1.4613553496973364	-30.291961825397873
1.4644840026763577	-30.49678967880071
1.4676128200797989	-30.702526710324225
1.470741800841928	-30.909174910007515
1.473870943906189	-31.11673626788618
1.4770002482251023	-31.32521277399237
1.480129712760169	-31.534606418354734
1.4832593364817739	-31.744919190998605
1.4863891183690918	-31.95615308194594
1.4895190574099941	-32.168310081215346
1.4926491526009553	-32.381392178822196
1.4957794029469629	-32.59540136477852
1.4989098074614269	-32.810339629093185
1.5020403651660919	-33.02620896177185
1.5051710750909486	-33.24301135281704
1.5083019362741474	-33.46074879222807
1.5114329477619128	-33.679423270001244
1.5145641086084596	-33.89903677612974
1.5176954178759088	-34.119591300603766
1.520826874634205	-34.34108883341043
1.5239584779610365	-34.56353136453394
1.5270902269417537	-34.78692088395551
1.5302221206692905	-35.01125938165349
1.5333541582440853	-35.23654884760325
1.5364863387740038	-35.462791271777384
1.539618661374264	-35.6899886441456
1.5427511251673593	-35.91814295467485
1.545883729282983	-36.14725619332922
1.5490164728579574	-36.37733035007014
1.5521493550361594	-36.60836741485625
1.5552823749684492	-36.84036937764353
1.5584155318125976	-37.07333822838525
1.5615488247332185	-37.307275957032054
1.5646822529016993	-37.54218455353196
1.5678158154961301	-37.7780660078304
1.5709495117012398	-38.01492230987024
1.5740833407083241	-38.25275544959174
1.577217301715186	-38.491567416932696
1.5803513939260658	-38.73136020182839
1.5834856165515787	-38.97213579421167
1.5866199688086502	-39.2138961840128
1.5897544499204543	-39.45664336115976
1.5928890591163514	-39.700379315578076
1.596023795631825	-39.94510603719087
1.5991586587084239	-40.190825515918895
1.6022936475937002	-40.437539741680595
1.6054287615411509	-40.685250704392104
1.608563999810159	-40.93396039396726
1.6116993616659365	-41.18367080031757
1.614834846379466	-41.43438391335235
1.6179704532274448	-41.68610172297866
1.6211061814922303	-41.938826219101394
1.6242420304617822	-42.192559391623156
1.627377999429611	-42.447303230444476
1.6305140876947204	-42.70305972546371
1.6336502945615594	-42.95983086657704
1.636786619339963	-43.2176186436786
1.6399230613451068	-43.47642504666037
1.6430596198974499	-43.7362520654123
1.6461962943226882	-43.9971016898223
1.649333083951702	-44.25897590977623
1.6524699881205067	-44.52187671515788
1.655607006170204	-44.7858060958491
1.658744137446933	-45.05076604172978
1.661881381301823	-45.316758542677825
1.6650187370909446	-45.58378558856912
1.6681562041752642	-45.85184916927775
1.6712937819205969	-46.120951274675825
1.674431469697561	-46.391093894633585
1.677569266881532	-46.662279019019344
1.6807071728525989	-46.93450863769961
1.6838451869955193	-47.20778474053904
1.686983308699675	-47.482109317400486
1.6901215373590293	-47.75748435814493
1.6932598723720844	-48.0339118526316
1.6963983131418385	-48.31139379071795
1.6995368590757451	-48.58993216225971
1.7026755095856687	-48.86952895711074
1.7058142640878473	-49.150186165123316
1.70895312200285	-49.4319057761479
1.712092082755538	-49.71468978003333
1.7152311457750222	-49.998540166626675
1.7183703104946284	-50.28345892577339
1.7215095763518553	-50.56944804731727
1.7246489427883376	-50.856509521100435
1.7277884092498073	-51.144645336963464
1.7309279751860565	-51.4338574847452
1.7340676400509007	-51.72414795428295
1.7372074033021423	-52.01551873541248
1.7403472644015334	-52.307971817967925
1.74348722281474	-52.60150919178185
1.7466272780113083	-52.89613284668534
1.7497674294646268	-53.191844772507885
1.7529076766518947	-53.48864695907753
1.756048019054084	-53.78654139622071
1.759188456155909	-54.08553007376246
1.7623289874457904	-54.3856149815263
1.7654696124158233	-54.68679810933433
1.7686103305617433	-54.98908144700708
1.771751141382895	-55.29246698436374
1.7748920443821985	-55.59695671122207
1.7780330390661196	-55.90255261739839
1.7811741249446362	-56.20925669270755
1.7843153015312083	-56.51707092696311
1.7874565683427461	-56.82599730997719
1.7905979248995818	-57.13603783156059
1.7937393707254365	-57.44719448152268
1.7968809053473922	-57.759469249671525
1.8000225282958617	-58.07286412581384
1.8031642391045595	-58.38738109975504
1.8063060373104731	-58.70302216129924
1.809447922453833	-59.019789300249144
1.812589894078086	-59.33768450640629
1.8157319517298671	-59.656709769570874
1.818874094958971	-59.97686707954187
1.822016323318324	-60.298158426116885
1.825158636363958	-60.62058579909238
1.8283010336549843	-60.944151188263554
1.831443514753566	-61.26885658342437
1.8345860792248894	-61.59470397436755
1.8377287266371427	-61.92169535088461
1.840871456561487	-62.2498327027659
1.8440142685720315	-62.57911801980058
1.8471571622458074	-62.90955329177656
1.850300137162745	-63.24114050848066
1.8534431929056467	-63.57388165969851
1.856586329060165	-63.9077787352146
1.8597295452147742	-64.24283372481223
1.8628728409607507	-64.5790486182736
1.8660162158921476	-64.91642540537984
1.8691596696057706	-65.2549660759109
1.872303201701155	-65.5946726196456
1.8754468117805427	-65.93554702636173
1.8785904994488607	-66.27759128583597
1.881734264313696	-66.6208073878439
1.8848781059852755	-66.96519732216005
1.8880220240764418	-67.31076307855788
1.8911660182026349	-67.6575066468098
1.894310087981865	-68.00543001668717
1.897454233034697	-68.35453517796036
1.9005984529842241	-68.70482412039858
1.9037427474560509	-69.05629883377014
1.9068871160782688	-69.40896130784235
1.910031558481439	-69.76281353238144
1.9131760742985697	-70.11785749715264
1.916320663165096	-70.47409519192027
1.9194653247188613	-70.83152860644759
1.9226100586000963	-71.19015973049694
1.9257548644513998	-71.54999055382966
1.9288997419177183	-71.91102306620616
1.932044690646329	-72.27325925738586
1.9351897102868185	-72.63670111712729
1.9383348004910652	-73.001350635188
1.941479960913219	-73.3672098013246
1.9446251912096857	-73.73428060529282
1.9477704910391063	-74.10256503684754
1.9509158600623395	-74.47206508574253
1.9540612979424434	-74.84278274173084
1.9572068043446589	-75.21471999456455
1.960352378936391	-75.58787883399492
1.9634980213871909	-75.9622612497722
1.9666437313687402	-76.33786923164591
1.969789508554833	-76.71470476936462
1.9729353526213593	-77.09276985267606
1.976081263246287	-77.47206647132718
1.9792272401096467	-77.85259661506389
1.9823732828935146	-78.23436227363145
1.9855193912819966	-78.61736543677421
1.9886655649612117	-79.00160809423573
1.9918118036192756	-79.38709223575866
1.9949581069462863	-79.77381985108494
1.9981044746343068	-80.16179292995561
2.0012509063773507	-80.55101346211103
2.0043974018713664	-80.9414834372906
2.007543960814221	-81.33320484523303
2.010690582905688	-81.72617967567626
2.013837267847428	-82.12040991835748
2.016984015342976	-82.5158975630129
2.02013082509773	-82.91264459937821
2.0232776968189303	-83.3106530171882
2.0264246302156503	-83.70992480617699
2.029571624998778	-84.11046195607781
2.0327186808810054	-84.51226645662334
2.0358657975768124	-84.91534029754534
2.039012974802455	-85.31968546857497
2.042160212275947	-85.72530395944253
2.0453075097170514	-86.13219775987773
2.0484548668472664	-86.54036885960949
2.0516022833898075	-86.949819248366
2.0547497590696	-87.36055091587485
2.0578972936132605	-87.77256585186281
2.0610448867490887	-88.18586604605592
2.064192538207052	-88.60045348817968
2.0673402477187732	-89.01633016795887
2.0704880150175162	-89.43349807511741
2.0736358398381776	-89.85195919937878
2.07678372191727	-90.27171553046566
2.079931660992911	-90.69276905810007
2.083079656804813	-91.11512177200336
2.086227709094268	-91.5387756618963
2.0893758176041386	-91.96373271749891
2.092523982078843	-92.3899949285307
2.0956722022643466	-92.8175642847103
2.0988204779081476	-93.24644277575592
2.1019688087592665	-93.67663239138506
2.105117194568234	-94.1081351213146
2.1082656350870828	-94.54095295526074
2.111414130069331	-94.9750878829391
2.1145626792699757	-95.41054189406475
2.1177112824454793	-95.84731697835204
2.120859939353759	-96.28541512551476
2.124008649754178	-96.7248383252661
2.127157413407531	-97.16558856731864
2.130306230076036	-97.60766784138437
2.133455099523325	-98.05107813717473
2.1366040215144295	-98.49582144440043
2.1397529958157744	-98.94189975277179
2.1429020221951647	-99.38931505199844
2.1460511004217775	-99.83806933178951
2.14920023026615	-100.28816458185338
2.1523494115001705	-100.73960279189808
2.1554986438970687	-101.192385951631
2.1586479272314048	-101.64651605075899
2.1617972612790615	-102.10199507898818
2.164946645817232	-102.55882502602438
2.1680960806244127	-103.01700788157278
2.171245565480393	-103.47654563533801
2.1743951001662443	-103.93744027702411
2.177544684464312	-104.39969379633462
2.1806943181582086	-104.8633081829726
2.1838440010328	-105.3282854266406
2.186993732874198	-105.79462751704048
2.190143513469754	-106.26233644387374
2.1932933426080474	-106.73141419684131
2.196443220078876	-107.20186276564364
2.199593145673249	-107.67368413998054
2.2027431191833795	-108.14688030955152
2.205893140402671	-108.6214532640554
2.2090432091257157	-109.09740499319062
2.2121933251482795	-109.57473748665512
2.2153434882672975	-110.05345273414623
2.2184936982808647	-110.53355272536088
2.2216439549882288	-111.01503944999553
2.224794258189778	-111.49791489774618
2.227944607687038	-111.9821810583082
2.231095003282661	-112.46783992137662
2.2342454447804188	-112.95489347664599
2.2373959319851937	-113.44334371381039
2.2405464647029727	-113.93319262256328
2.243697042740837	-114.42444219259791
2.2468476659069565	-114.91709441360686
2.249998334010582	-115.41115127528239
2.253149046862035	-115.90661476731621
2.2562998042727043	-116.40348687939961
2.259450606055036	-116.90176960122344
2.2626014520225257	-117.40146492247818
2.265752341989712	-117.90257483285369
2.2689032757721694	-118.40510132203951
2.2720542531865022	-118.90904637972477
2.2752052740503346	-119.41441199559812
2.2783563381823044	-119.92120015934769
2.281507445402058	-120.42941286066137
2.2846585955302414	-120.93905208922651
2.2878097883884947	-121.45011983472999
2.290961023799444	-121.96261808685847
2.294112301586693	-122.47654883529789
2.2972636215748223	-122.99191406973404
2.3004149835893752	-123.50871577985218
2.3035663874568564	-124.02695595533724
2.306717833004723	-124.54663658587361
2.3098693200613782	-125.0677596611454
2.3130208484561665	-125.59032717083622
2.3161724180193644	-126.11434110462946
2.3193240285821757	-126.63980345220781
2.3224756799767254	-127.16671620325387
2.3256273720360547	-127.6950813474497
2.3287791045941106	-128.22490087447704
2.331930877485744	-128.75617677401712
2.3350826905467	-129.2889110357509
2.3382345436136163	-129.823105649359
2.3413864365240133	-130.35876260452156
2.3445383691162887	-130.8958838909183
2.3476903412297134	-131.4344714982287
2.3508423527044244	-131.97452741613182
2.353994403381419	-132.5160536343064
2.357146493102549	-133.05905214243063
2.3602986217105153	-133.60352493018254
2.3634507890488616	-134.14947398723973
2.366602994961971	-134.6969013032794
2.369755239295055	-135.24580886797852
2.372907521894155	-135.79619867101349
2.376059842606133	-136.34807270206056
2.379212201278664	-136.90143295079554
2.3823645977602346	-137.45628140689394
2.385517031900137	-138.01262006003074
2.3886695035484617	-138.57045089988088
2.391822012556094	-139.12977591611877
2.3949745587747056	-139.69059709841855
2.3981271420567554	-140.2529164364539
2.4012797622554793	-140.81673591989824
2.404432419224886	-141.38205753842476
2.4075851128197514	-141.9488832817062
2.4107378428956174	-142.51721513941501
2.4138906093087824	-143.08705510122329
2.4170434119162985	-143.65840515680281
2.4201962505759655	-144.23126729582512
2.4233491251463275	-144.8056435079613
2.4265020354866658	-145.3815357828821
2.4296549814569977	-145.9589461102582
2.432807962918066	-146.53787647975977
2.435960979731343	-147.1183288810566
2.4391140317590154	-147.7003053038183
2.4422671188639873	-148.28380773771414
2.4454202409098724	-148.8688381724131
2.4485733977609914	-149.4553985975839
2.4517265892823636	-150.04349100289477
2.454879815339707	-150.63311737801376
2.458033075799431	-151.22427971260873
2.461186370528633	-151.81697999634716
2.4643396993950932	-152.41122021889606
2.46749306226727	-153.00700236992233
2.4706464590142985	-153.6043284390926
2.4737998895059823	-154.2032004160732
2.47695335361279	-154.80362029052998
2.4801068512058553	-155.40559005212873
2.4832603821569648	-156.00911169053487
2.486413946338563	-156.61418719541356
2.489567543623739	-157.22081855642963
2.4927211738862307	-157.82900776324763
2.4958748370004153	-158.4387568055319
2.4990285328413067	-159.05006767294654
2.5021822612845512	-159.66294235515514
2.5053360222064254	-160.2773828418213
2.5084898154838293	-160.8933911226081
2.5116436409942846	-161.51096918717866
2.51479749861593	-162.13011902519546
2.517951388227517	-162.750842626321
2.5211053097084064	-163.37314198021738
2.524259262938565	-163.99701907654656
2.52741324779856	-164.62247590497
2.530567264169558	-165.24951445514913
2.5337213119333186	-165.87813671674502
2.536875390972193	-166.50834467941854
2.5400295011691187	-167.14014033283033
2.5431836424076155	-167.77352566664052
2.546337814571783	-168.40850267050934
2.5494920175462994	-169.0450733340965
2.55264625121641	-169.68323964706167
2.5558005154679337	-170.32300359906412
2.5589548101872537	-170.96436717976306
2.5621091352613115	-171.60733237881712
2.565263490577611	-172.2519011858849
2.568417876024209	-172.89807559062479
2.571572291489715	-173.54585758269496
2.5747267368632856	-174.19524915175322
2.577881212034622	-174.84625228745722
2.5810357168939677	-175.49886897946428
2.5841902513321044	-176.15310121743178
2.587344815240346	-176.80895099101625
2.590499408510541	-177.46642028987466
2.5936540310350638	-178.12551110366337
2.596808682706816	-178.78622542203863
2.5999633634192203	-179.44856523465643
2.603118073066217	-180.11253253117255
2.606272811542263	-180.7781293012425
2.6094275787423267	-181.44535753452166
2.6125823745618875	-182.11421922066515
2.615737198896929	-182.78471634932768
2.6188920516439382	-183.45685091016404
2.6220469326999036	-184.13062489282865
2.62520184196231	-184.80604028697562
2.628356779329137	-185.48309908225914
2.631511744698854	-186.1618032683328
2.634666737970418	-186.84215483485028
2.6378217590432746	-187.524155771465
2.6409768078173483	-188.20780806782992
2.644131884193044	-188.89311371359796
2.6472869880712446	-189.580074698422
2.6504421193533045	-190.26869301195455
2.6535972779410524	-190.9589706438478
2.65675246373678	-191.65090958375393
2.6599076766432495	-192.3445118213248
2.6630629165636823	-193.03977934621227
2.6662181834017615	-193.73671414806756
2.669373477061625	-194.435318216542
2.6725287974478684	-195.13559354128677
2.6756841444655364	-195.83754211195279
2.678839518020123	-196.54116591819064
2.6819949180175695	-197.24646694965085
2.6851503443642613	-197.9534471959838
2.688305796967023	-198.66210864683953
2.6914612757331198	-199.37245329186803
2.6946167805702506	-200.08448312071883
2.697772311386551	-200.79820012304154
2.700927868090585	-201.5136062884855
2.7040834505913436	-202.23070360669988
2.707239058798247	-202.9494940673336
2.710394692621138	-203.66997966003552
2.713550351970279	-204.3921623744541
2.716706036756351	-205.11604420023795
2.719861746890451	-205.84162712703497
2.723017482284092	-206.56891314449337
2.7261732428491934	-207.29790424226096
2.729329028498088	-208.02860240998547
2.732484839143512	-208.7610096373143
2.7356406746986077	-209.4951279138948
2.7387965350769186	-210.23095922937415
2.741952420192387	-210.96850557339934
2.7451083299593524	-211.7077689356169
2.7482642642925494	-212.44875130567365
2.7514202231071048	-213.19145467321596
2.7545762063185366	-213.93588102789005
2.7577322138427505	-214.68203235934212
2.760888245596037	-215.4299106572179
2.7640443014950717	-216.17951791116323
2.7672003814569113	-216.93085611082392
2.770356485398991	-217.68392724584487
2.7735126132391232	-218.4387333058717
2.776668764895496	-219.1952762805493
2.7798249402866704	-219.95355815952263
2.782981139331577	-220.7135809324364
2.786137361949516	-221.47534658893528
2.7892936080601527	-222.23885711866353
2.792449877583519	-223.00411451126553
2.795606170440009	-223.77112075638547
2.7987624865503737	-224.53987784366694
2.8019188258357257	-225.31038776275386
2.8050751882175327	-226.08265250328995
2.808231573617617	-226.85667405491853
2.8113879819581533	-227.63245440728292
2.814544413161666	-228.40999555002628
2.8177008671510277	-229.18929947279165
2.8208573438494597	-229.97036816522186
2.8240138431805226	-230.7532036169594
2.8271703650681244	-231.5378078176469
2.830326909436511	-232.32418275692677
2.8334834762102687	-233.11233042444115
2.836640065314319	-233.90225280983213
2.8397966766739193	-234.69395190274162
2.8429533102146594	-235.48742969281147
2.846109965862462	-236.28268816968333
2.8492666435435745	-237.07972932299845
2.8524233431845776	-237.87855514239834
2.8555800647123744	-238.6791676175241
2.8587368080541924	-239.48156873801673
2.8618935731375816	-240.28576049351724
2.8650503598904122	-241.09174487366633
2.8682071682408727	-241.89952386810455
2.8713639981174692	-242.7090994664724
2.8745208494490213	-243.52047365841042
2.877677722164663	-244.33364843355835
2.8808346161938396	-245.1486257815565
2.8839915314663065	-245.9654076920447
2.887148467912128	-246.7839961546628
2.890305425461673	-247.60439315905032
2.893462404045617	-248.42660069484683
2.8966194035949386	-249.25062075169166
2.8997764240409163	-250.0764553192241
2.9029334653151286	-250.9041063870831
2.9060905273494555	-251.7335759449076
2.909247610076069	-252.56486598233653
2.91240471342744	-253.3979784890085
2.9155618373363295	-254.23291545456212
2.9187189817357932	-255.0696788686357
2.921876146559175	-255.90827072086762
2.925033331740109	-256.74869300089625
2.9281905372125148	-257.59094769835923
2.9313477629105975	-258.43503680289456
2.934505008768849	-259.2809623041402
2.9376622747220402	-260.12872619173356
2.940819560705225	-260.97833045531235
2.9439768666537365	-261.8297770845139
2.9471341925031846	-262.6830680689755
2.9502915381894566	-263.5382053983343
2.9534489036487157	-264.39519106222735
2.956606288817396	-265.2540270502913
2.959763693632206	-266.1147153521632
2.962921118030124	-266.97725795747965
2.9660785619483976	-267.8416568558771
2.9692360253245407	-268.707914036992
2.972393508096336	-269.57603149046065
2.975551010201829	-270.44601120591926
2.97870853157933	-271.3178551730039
2.98186607216741	-272.1915653813504
2.9850236319049013	-273.0671438205946
2.9881812107308967	-273.94459248037225
2.9913388085847448	-274.82391335031883
2.994496425406052	-275.7051084200699
2.99765406113468	-276.58817967926086
3.0008117157107432	-277.47312911752675
3.0039693890746104	-278.3599587245031
3.0071270811668995	-279.2486704898243
3.01028479192848	-280.1392664031257
3.013442521300469	-281.031748454042
3.016600269224231	-281.9261186322077
3.019758035641376	-282.82237892725755
3.0229158204937594	-283.7205313288259
3.0260736237234807	-284.6205778265472
3.0292314452728797	-285.52252041005556
3.0323892850845384	-286.4263610689853
3.0355471431012777	-287.33210179297004
3.0387050192661564	-288.23974457164394
3.041862913522472	-289.1492913946407
3.045020825813756	-290.0607442515942
3.0481787560837765	-290.9741051321378
3.051336704276533	-291.8893760259051
3.0544946703362594	-292.80655892252935
3.0576526542074203	-293.72565581164406
3.0608106558347057	-294.6466686828821
3.063968675163041	-295.56959952587664
3.0671267121375743	-296.49445033026063
3.0702847667036823	-297.42122308566695
3.0734428388069657	-298.3499197817283
3.07660092839325	-299.28054240807734
3.079759035408583	-300.21309295434656
3.082917159799235	-301.1475734101688
3.0860753015116935	-302.0839857651757
3.0892334604926703	-303.0223320089999
3.0923916366890922	-303.9626141312736
3.095549830048104	-304.90483412162865
3.0987080405170677	-305.8489939696972
3.101866268043558	-306.79509566511086
3.105024512575365	-307.7431411975016
3.108182774060492	-308.693132556501
3.1113410524471528	-309.6450717317407
3.1144993476837715	-310.598960712852
3.117657659718983	-311.5548014894662
3.12081598850163	-312.51259605121476
3.123974333980762	-313.47234638772875
3.1271326961056376	-314.43405448863933
3.130291074825718	-315.39772234357736
3.133449470090668	-316.36335194217395
3.136607881850359	-317.33094527405973
3.1397663100548616	-318.3005043288655
3.1429247546544494	-319.27203109622167
3.1460832155995946	-320.245527565759
3.1492416928409703	-321.2209957271078
3.1524001863294475	-322.19843756989843
3.155558696016093	-323.17785508376113
3.158717221852171	-324.15925025832615
3.161875763789142	-325.1426250832237
3.1650343217786574	-326.12798154808337
3.168192895772565	-327.1153216425353
3.1713514857229033	-328.1046473562092
3.174510091581904	-329.0959606787349
3.177668713301987	-330.08926359974197
3.180827350835763	-331.0845581088599
3.18398600413603	-332.08184619571824
3.1871446731557755	-333.08112984994636
3.190303357848173	-334.08241106117373
3.193462058166579	-335.0856918190291
3.1966207740645394	-336.0909741131419
3.1997795054957803	-337.09825993314104
3.2029382524142127	-338.1075512686556
3.2060970147739303	-339.1188501093143
3.209255792529205	-340.132158444746
3.2124145856344914	-341.1474782645794
3.215573394044424	-342.16481155844326
3.218732217713814	-343.1841603159658
3.2218910565976504	-344.2055265267757
3.2250499106511006	-345.22891218050125
3.2282087798295067	-346.25431926677084
3.231367664088386	-347.28174977521246
3.2345265633834304	-348.31120569545453
3.237685477670504	-349.34268901712494
3.2408444069056452	-350.37620172985174
3.244003351045062	-351.41174582326266
3.247162310045135	-352.4493232869856
3.250321283862413	-353.4889361106484
3.253480272453617	-354.5305862838785
3.2566392757756324	-355.5742757963037
3.2597982937855146	-356.6200066375514
3.262957326440486	-357.667780797249
3.2661163736979324	-358.71760026502403
3.269275435515408	-359.76946703050373
3.272434511850629	-360.823383083315
3.275593602661475	-361.87935041308515
3.278752707905991	-362.9373710094411
3.28191182754238	-363.9974468620102
3.285070961529008	-365.0595799604189
3.2882301098244033	-366.1237722942943
3.2913892723872507	-367.1900258532632
3.2945484491763954	-368.2583426269522
3.2977076401508407	-369.3287246049877
3.3008668452697463	-370.4011737769965
3.3040260644924295	-371.47569213260476
3.3071852977783625	-372.5522816614392
3.310344545087174	-373.630944353126
3.3135038063786446	-374.71168219729134
3.3166630816127114	-375.7944971835615
3.3198223707494625	-376.87939130156275
3.3229816737491387	-377.96636654092066
3.326140990572131	-379.05542489126145
3.329300321178983	-380.146568342211
3.3324596655303873	-381.23979888339517
3.3356190235871854	-382.33511850443966
3.338778395310369	-383.43252919497013
3.3419377806610746	-384.5320329446123
3.3450971796005895	-385.63363174299167
3.3482565920903453	-386.7373275797338
3.351416018091919	-387.8431224444639
3.3545754575670332	-388.9510183268075
3.357734910477556	-390.06101721638976
3.3608943767854975	-391.1731211028359
3.3640538564530122	-392.2873319757711
3.367213349442396	-393.40365182482043
3.370372855716087	-394.5220826396089
3.373532375236665	-395.6426264097617
3.3766919079668476	-396.7652851249033
3.379851453869495	-397.8900607746588
3.383011012907605	-399.0169553486527
3.386170585044314	-400.14597083651
3.3893301702428964	-401.27710922785514
3.392489768466764	-402.4103725123126
3.395649379679464	-403.54576267950705
3.3988090038446814	-404.6832817190632
3.4019686409262335	-405.8229316206047
3.405128290888075	-406.96471437375635
3.408287953694292	-408.10863196814233
3.411447629309106	-409.25468639338675
3.4146073176968716	-410.4028796391138
3.4177670188220723	-411.5532136949475
3.420926732649327	-412.7056905505119
3.424086459143383	-413.8603121954309
3.4272461982691196	-415.01708061932857
3.4304059499915427	-416.1759978118283
3.4335657142757903	-417.33706576255423
3.4367254910871283	-418.50028646112986
3.4398852803909494	-419.6656618971789
3.4430450821527745	-420.8331940603249
3.4462048963382514	-422.00288494019134
3.449364722913154	-423.17473652640183
3.4525245618433806	-424.3487508085799
3.4556844130949553	-425.5249297763484
3.458844276634027	-426.7032754193309
3.462004152426868	-427.88378972715077
3.465164040439874	-429.06647468943095
3.468323940639563	-430.25133229579467
3.4714838529925762	-431.438364535865
3.4746437774656753	-432.62757339926486
3.477803714025744	-433.8189608756174
3.480963662639785	-435.0125289545452
3.4841236232749226	-436.20827962567114
3.4872835958983996	-437.4062148786182
3.4904435804775784	-438.60633670300894
3.4936035769799387	-439.8086470884661
3.496763585373079	-441.0131480246122
3.4999236056247134	-442.21984150106994
3.5030836377026753	-443.4287295074617
3.5062436815749125	-444.6398140334102
3.509403737209489	-445.8530970685374
3.512563804574582	-447.0685806024658
3.5157238836384885	-448.2862666248177
3.518883974369614	-449.50615712521534
3.522044076736481	-450.7282540932809
3.525204190707723	-451.9525595186366
3.528364316252087	-453.17907539090436
3.531524453338434	-454.4078036997064
3.5346846019357328	-455.63874643466437
3.537844762013066	-456.8719055854004
3.5410049335396265	-458.1072831415363
3.5441651164847165	-459.34488109269387
3.547325310817748	-460.58470142849495
3.5504855165082416	-461.82674613856113
3.553645733525829	-463.0710172125141
3.5568059618402468	-464.3175166399758
3.5599662014213416	-465.5662464105672
3.563126452239065	-466.8172085139102
3.566286714263478	-468.070404939626
3.569446987464746	-469.3258376773362
3.57260727181314	-470.5835087166621
3.575767567279038	-471.843420047225
3.5789278738329204	-473.1055736586461
3.582088191445375	-474.3699715405468
3.5852485200870907	-475.6366156825483
3.5884088597288617	-476.9055080742714
3.5915692103415835	-478.1766507053372
3.5947295718962557	-479.4500455653668
3.5978899443639794	-480.7256946439812
3.6010503277159573	-482.0035999308014
3.6042107219234936	-483.2837634154481
3.6073711269579927	-484.5661870875422
3.61053154279096	-485.8508729367045
3.613691969394001	-487.1378229525557
3.616852406738818	-488.4270391247165
3.6200128547972152	-489.7185234428074
3.6231733135410957	-491.01227789644923
3.6263337829424582	-492.30830447526233
3.6294942629734015	-493.60660516886725
3.6326547536061193	-494.9071819668845
3.6358152548129055	-496.21003685893464
3.6389757665661464	-497.5151718346376
3.642136288838327	-498.8225888836139
3.6452968216020274	-500.132289995484
3.6484573648299228	-501.4442771598678
3.6516179184947832	-502.7585523663857
3.6547784825694722	-504.0751176046578
3.657939057026949	-505.3939748643042
3.661099641840265	-506.7151261349448
3.664260236982566	-508.03857340619993
3.6674208424270875	-509.3643186676892
3.670581458147162	-510.6923639090326
3.673742084116209	-512.02271111985
3.676902720307744	-513.3553622897614
3.6800633666953706	-514.6903194083865
3.6832240232527846	-516.0275844653447
3.686384689953772	-517.3671594502564
3.6895453667722102	-518.7090463527409
3.692706053682061	-520.0532471624175
3.6958667506573817	-521.399763868906
3.6990274576723143	-522.7485984618262
3.702188174701092	-524.0997529307973
3.7053489017180343	-525.4532292654387
3.7085096386975485	-526.80902945537
3.71167038561413	-528.1671554902106
3.714831142442362	-529.5276093595797
3.717991909156911	-530.8903930530965
3.721152685732533	-532.2555085603803
3.724313472144068	-533.6229578710503
3.727474268366443	-534.9927429747256
3.730635074374668	-536.3648658610255
3.733795890143841	-537.7393285195689
3.736956715649141	-539.1161329399749
3.740117550865832	-540.4952811118628
3.7432783957692646	-541.876775024851
3.746439250334867	-543.2606166685588
3.7496001145381563	-544.6468080326049
3.7527609883547286	-546.0353511066083
3.7559218717602634	-547.4262478801876
3.7590827647305227	-548.8195003429616
3.762243667241349	-550.2151104845492
3.7654045792686666	-551.6130802945692
3.7685655007884806	-553.01341176264
3.771726431776876	-554.41610687838
3.7748873722100207	-555.821167631408
3.7780483220641585	-557.2285960113427
3.7812092813156157	-558.6383940078022
3.784370249940798	-560.0505636104053
3.787531227916187	-561.4651068087702
3.7906922152183458	-562.8820255925157
3.793853211823915	-564.3013219512598
3.797014217709613	-565.7229978746205
3.8001752328522347	-567.1470553522167
3.803336257228654	-568.5734963736662
3.806497290815822	-570.0023229285873
3.809658333590764	-571.4335370065982
3.812819385530583	-572.8671405973172
3.815980446612459	-574.303135690362
3.8191415168136467	-575.7415242753513
3.8223025961114754	-577.1823083419023
3.8254636844833505	-578.6254898796334
3.8286247819067523	-580.0710708781623
3.8317858883592355	-581.5190533271075
3.8349470038184275	-582.9694392160862
3.838108128262031	-584.4222305347167
3.841269261667822	-585.8774292726165
3.8444304040136497	-587.3350374194036
3.8475915552774365	-588.7950569646957
3.850752715437176	-590.2574898981103
3.8539138844709355	-591.7223382092652
3.8570750623568535	-593.1896038877782
3.8602362490731412	-594.6592889232663
3.8633974445980805	-596.1313953053478
3.8665586489100243	-597.6059250236397
3.869719861987397	-599.0828800677598
3.872881083808694	-600.5622624273257
3.8760423143524783	-602.0440740919544
3.8792035535973866	-603.5283170512633
3.8823648015221224	-605.0149932948701
3.88552605810546	-606.5041048123919
3.8886873233262422	-607.9956535934461
3.891848597163382	-609.4896416276499
3.8950098795958583	-610.9860709046204
3.898171170602722	-612.4849434139754
3.9013324701630885	-613.9862611453314
3.904493778256142	-615.4900260883055
3.907655094861136	-616.9962402325151
3.9108164199573885	-618.5049055675773
3.913977753524287	-620.016024083109
3.917139095541283	-621.5295977687272
3.9203004459878965	-623.0456286140488
3.923461804843712	-624.5641186086909
3.926623172088383	-626.0850697422707
3.929784547701623	-627.6084840044043
3.932945931663215	-629.134363384709
3.936107323953008	-630.6627098728017
3.939268724550912	-632.1935254582988
3.9424301334369045	-633.7268121308175
3.945591550591025	-635.2625718799743
3.9487529759933797	-636.8008066953859
3.9519144096241376	-638.3415185666693
3.9550758514635285	-639.8847094834405
3.9582373014918484	-641.4303814353161
3.961398759689456	-642.9785364119133
3.9645602260367725	-644.5291764028482
3.9677217005142813	-646.0823033977373
3.970883183102528	-647.6379193861974
3.97404467378212	-649.1960263578445
3.977206172533729	-650.7566263022957
3.980367679338083	-652.3197212091666
3.983529194175975	-653.8853130680739
3.9866907170282593	-655.4534038686338
3.9898522478758496	-657.0239956004629
3.9930137866997204	-658.5970902531769
3.996175333480907	-660.1726898163929
3.999336888200504	-661.7507962797264
4.002498450839666	-663.3314116327939
4.005660021379609	-664.9145378652117
4.008821599801604	-666.5001769665957
4.011983186086987	-668.0883309265616
4.015144780217146	-669.6790017347262
4.0183063821735345	-671.2721913807051
4.02146799193766	-672.8679018541145
4.02462960949109	-674.4661351445701
4.0277912348154485	-676.0668932416884
4.030952867892421	-677.6701781350848
4.034114508703745	-679.2759918143756
4.037276157231218	-680.8843362691763
4.040437813456696	-682.495213489103
4.043599477362088	-684.1086254637713
4.046761148929365	-685.7245741827974
4.0499228281405495	-687.3430616357964
4.053084514977723	-688.9640898123848
4.056246209423022	-690.5876607021783
4.059407911458638	-692.2137762947916
4.062569621066819	-693.8424385798411
4.065731338229868	-695.4736495469424
4.068893062930143	-697.107411185711
4.072054795150058	-698.7437254857625
4.07521653487208	-700.3825944367127
4.078378282078732	-702.0240200281766
4.081540036752588	-703.66800424977
4.0847017988762815	-705.3145490911087
4.087863568432494	-706.9636565418076
4.091025345403965	-708.6153285914819
4.094187129773485	-710.269567229748
4.097348921523898	-711.9263744462204
4.100510720638103	-713.5857522305148
4.1036725270990475	-715.2477025722462
4.106834340889738	-716.9122274610304
4.1099961619932275	-718.5793288864826
4.113157990392621	-720.2490088382175
4.116319826071082	-721.9212693058506
4.119481669011819	-723.5961122789973
4.122643519198095	-725.2735397472726
4.125805376613225	-726.9535537002914
4.128967241240574	-728.6361561276696
4.132129113063557	-730.3213490190213
4.135290992065642	-732.0091343639625
4.138452878230347	-733.6995141521076
4.141614771541239	-735.3924903730716
4.144776671981935	-737.0880650164698
4.147938579536106	-738.7862400719172
4.151100494187469	-740.4870175290283
4.15426241591979	-742.1903993774185
4.1574243447168895	-743.8963876067024
4.160586280562632	-745.6049842064951
4.1637482234409315	-747.3161911664117
4.166910173335755	-749.0300104760664
4.170072130231113	-750.746444125074
4.17323409411107	-752.4654941030499
4.176396064959734	-754.1871623996084
4.179558042761263	-755.9114510043643
4.182720027499864	-757.6383619069322
4.18588201915979	-759.3678970969273
4.189044017725343	-761.100058563964
4.19220602318087	-762.8348482976567
4.1953680355107705	-764.5722682876199
4.198530054699486	-766.3123205234687
4.2016920807315055	-768.0550069948171
4.204854113591368	-769.8003296912801
4.208016153263654	-771.5482906024722
4.211178199732996	-773.2988917180077
4.2143402529840674	-775.0521350275015
4.217502313001592	-776.8080225205674
4.220664379770337	-778.5665561868204
4.223826453275116	-780.3277380158745
4.226988533500787	-782.0915699973443
4.230150620432257	-783.8580541208443
4.233312714054471	-785.6271923759884
4.236474814352427	-787.3989867523915
4.2396369213111615	-789.1734392396673
4.242799034915761	-790.9505518274309
4.245961155151353	-792.7303265052958
4.24912328200311	-794.5127652628765
4.252285415456249	-796.2978700897874
4.255447555496031	-798.085642975642
4.25860970210776	-799.8760859100556
4.261771855276785	-801.6692008826413
4.264934014988498	-803.4649898830139
4.268096181228334	-805.2634549007875
4.2712583539817714	-807.0645979255758
4.274420533234332	-808.8684209469931
4.27758271897158	-810.6749259546531
4.280744911179123	-812.4841149381701
4.283907109842608	-814.2959898871583
4.287069314947731	-816.1105527912315
4.290231526480223	-817.9278056400036
4.293393744425861	-819.7477504230893
4.296555968770464	-821.5703891301011
4.299718199499894	-823.395723750654
4.302880436600049	-825.2237562743612
4.306042680056873	-827.0544886908372
4.309204929856351	-828.8879229896952
4.312367185984508	-830.7240611605496
4.315529448427411	-832.5629051930139
4.318691717171169	-834.4044570767019
4.321853992201929	-836.2487188012277
4.325016273505877	-838.0956923562046
4.3281785610692465	-839.9453797312464
4.331340854878303	-841.7977829159669
4.33450315491936	-843.6529038999796
4.337665461178764	-845.5107446728985
4.340827773642905	-847.371307224337
4.343990092298213	-849.2345935439089
4.347152417131156	-851.1006056212278
4.350314748128241	-852.9693454459072
4.353477085276017	-854.8408150075603
4.356639428561069	-856.7150162958012
4.359801777970023	-858.5919513002432
4.362964133489541	-860.4716220104998
4.366126495106329	-862.3540304161845
4.369288862807126	-864.239178506911
4.372451236578714	-866.1270682722927
4.375613616407908	-868.0177017019427
4.378776002281566	-869.9110807854744
4.381938394186582	-871.8072075125015
4.3851007921098875	-873.7060838726375
4.388263196038452	-875.6077118554954
4.3914256059592836	-877.5120934506886
4.394588021859427	-879.4192306478305
4.397750443725964	-881.3291254365346
4.400912871546013	-883.2417798064142
4.404075305306731	-885.1571957470821
4.407237744995311	-887.0753752481517
4.410400190598982	-888.9963202992366
4.4135626421050125	-890.9200328899497
4.416725099500703	-892.846515009904
4.419887562773397	-894.7757686487132
4.423050031910466	-896.7077957959903
4.426212506899325	-898.6425984413485
4.429374987727419	-900.5801785744005
4.432537474382234	-902.5205381847595
4.435699966851288	-904.463679262039
4.438862465122136	-906.4096037958518
4.44202496918237	-908.358313775811
4.445187479019615	-910.3098111915297
4.448349994621531	-912.2640980326206
4.451512515975817	-914.2211762886977
4.454675043070202	-916.1810479493727
4.457837575892452	-918.1437150042591
4.4610001144303695	-920.1091794429699
4.464162658671787	-922.077443255118
4.467325208604578	-924.0485084303165
4.470487764216643	-926.022376958178
4.473650325495925	-927.9990508283153
4.476812892430392	-929.9785320303419
4.479975465008053	-931.9608225538702
4.483138043216949	-933.9459243885128
4.4863006270451535	-935.9338395238829
4.4894632164807735	-937.9245699495933
4.492625811511951	-939.9181176552563
4.4957884121268625	-941.9144846304854
4.498951018313714	-943.9136728648928
4.502113630060748	-945.9156843480914
4.505276247356239	-947.9205210696945
4.508438870188493	-949.9281850193137
4.511601498545851	-951.9386781865622
4.514764132416684	-953.9520025610528
4.517926771789402	-955.968160132398
4.521089416652439	-957.9871528902105
4.524252066994266	-960.0089828241029
4.527414722803386	-962.0336519236879
4.530577384068334	-964.0611621785783
4.533740050777676	-966.0915155783861
4.536902722920011	-968.1247141127241
4.540065400483969	-970.1607597712048
4.543228083458213	-972.199654543441
4.546390771831435	-974.2414004190449
4.549553465592361	-976.2859993876293
4.552716164729748	-978.3334534388064
4.555878869232385	-980.3837645621887
4.55904157908909	-982.436934747389
4.56220429428871	-984.4929659840192
4.565367014820131	-986.5518602616921
4.56852974067226	-988.6136195700199
4.571692471834043	-990.678245898615
4.574855208294452	-992.7457412370899
4.578017950042489	-994.8161075750569
4.5811806970671896	-996.8893469021284
4.584343449357619	-998.9654612079169
4.58750620690287	-1001.0444524820342
4.590668969692067	-1003.1263227140928
4.593831737714365	-1005.2110738937055
4.596994510958949	-1007.2987080104836
4.600157289415033	-1009.38922705404
4.603320073071861	-1011.4826330139871
4.606482861918704	-1013.5789278799364
4.6096456559448695	-1015.6781136415013
4.612808455139686	-1017.7801922882928
4.615971259492516	-1019.8851658099237
4.61913406899275	-1021.9930361960058
4.622296883629809	-1024.1038054361516
4.625459703393141	-1026.217475519973
4.628622528272225	-1028.3340484370824
4.631785358256565	-1030.4535261770914
4.634948193335696	-1032.5759107296128
4.638111033499185	-1034.7012040842587
4.64127387873662	-1036.82940823064
4.644436729037626	-1038.96052515837
4.6475995843918465	-1041.09455685706
4.650762444788963	-1043.2315053163225
4.6539253102186775	-1045.3713725257692
4.657088180670725	-1047.5141604750124
4.660251056134866	-1049.6598711536635
4.66341393660089	-1051.8085065513355
4.666576822058612	-1053.960068657639
4.6697397124978774	-1056.1145594621873
4.672902607908557	-1058.2719809545913
4.67606550828055	-1060.4323351244634
4.6792284136037825	-1062.5956239614152
4.6823913238682096	-1064.761849455059
4.68555423906381	-1066.9310135950066
4.6887171591805945	-1069.1031183708699
4.691880084208594	-1071.2781657722599
4.695043014137874	-1073.4561577887896
4.69820594895852	-1075.6370964100704
4.70136888866065	-1077.8209836257136
4.704531833234405	-1080.0078214253317
4.707694782669952	-1082.197611798536
4.710857736957486	-1084.390356734939
4.714020696087231	-1086.5860582241514
4.7171836600494315	-1088.784718255786
4.720346628834361	-1090.9863388194535
4.72350960243232	-1093.1909219047666
4.726672580833633	-1095.398469501336
4.729835564028655	-1097.608983598774
4.732998552007759	-1099.8224661866925
4.736161544761352	-1102.038919254703
4.73932454227986	-1104.2583447924164
4.742487544553738	-1106.480744789446
4.745650551573465	-1108.7061212354013
4.748813563329548	-1110.9344761198956
4.751976579812515	-1113.1658114325396
4.7551396010129245	-1115.400129162945
4.758302626921355	-1117.6374313007238
4.761465657528415	-1119.8777198354871
4.764628692824733	-1122.120996756847
4.767791732800966	-1124.367264054415
4.770954777447793	-1126.6165237178018
4.774117826755921	-1128.8687777366194
4.777280880716078	-1131.1240281004798
4.780443939319021	-1133.3822767989936
4.783607002555527	-1135.6435258217728
4.7867700704164005	-1137.9077771584286
4.789933142892468	-1140.175032798573
4.793096219974582	-1142.445294731817
4.796259301653619	-1144.7185649477724
4.799422387920478	-1146.9948454360497
4.802585478766083	-1149.2741381862613
4.805748574181385	-1151.556445188018
4.808911674157353	-1153.8417684309316
4.812074778684983	-1156.130109904613
4.815237887755296	-1158.4214715986743
4.818401001359332	-1160.7158555027258
4.821564119488159	-1163.01326360638
4.824727242132868	-1165.313697899247
4.827890369284571	-1167.617160370939
4.831053500934406	-1169.9236530110672
4.834216637073531	-1172.2331778092423
4.837379777693129	-1174.545736755076
4.840542922784407	-1176.8613318381801
4.843706072338594	-1179.1799650481648
4.846869226346942	-1181.5016383746424
4.850032384800725	-1183.8263538072233
4.853195547691242	-1186.1541133355188
4.8563587150098115	-1188.4849189491406
4.859521886747777	-1190.8187726376993
4.862685062896504	-1193.1556763908063
4.86584824344738	-1195.495632198073
4.869011428391817	-1197.8386420491106
4.872174617721246	-1200.1847079335298
4.87533781142712	-1202.5338318409426
4.878501009500922	-1204.8860157609588
4.881664211934145	-1207.2412616831907
4.884827418718314	-1209.5995715972485
4.887990629844969	-1211.9609474927443
4.891153845305678	-1214.3253913592882
4.894317065092028	-1216.6929051864918
4.897480289195625	-1219.0634909639662
4.900643517608101	-1221.4371506813225
4.903806750321109	-1223.8138863281713
4.9069699873263195	-1226.193699894124
4.91013322861543	-1228.5765933687912
4.913296474180156	-1230.9625687417845
4.9164597240122365	-1233.3516280027143
4.919622978103429	-1235.7437731411922
4.922786236445513	-1238.139006146829
4.925949499030292	-1240.5373290092357
4.929112765849588	-1242.9387437180224
4.932276036895243	-1245.3432522628013
4.935439312159122	-1247.7508566331826
4.938602591633111	-1250.1615588187774
4.941765875309115	-1252.5753608091964
4.944929163179061	-1254.9922645940508
4.948092455234896	-1257.4122721629515
4.95125575146859	-1259.8353855055097
4.954419051872129	-1262.2616066113355
4.9575823564375225	-1264.69093747004
4.960745665156801	-1267.1233800712344
4.9639089780220145	-1269.558936404529
4.967072295025231	-1271.997608459535
4.970235616158542	-1274.439398225863
4.973398941414057	-1276.8843076931244
4.976562270783908	-1279.3323388509295
4.979725604260245	-1281.7834936888896
4.982888941835237	-1284.237774196614
4.986052283501076	-1286.6951823637155
4.98921562924997	-1289.1557201798032
4.992378979074151	-1291.6193896344885
4.995542332965869	-1294.0861927173826
4.99870569091739	-1296.5561314180952
5.0018690529210055	-1299.0292077262384
5.005032418969023	-1301.5054236314218
5.008195789053771	-1303.9847811232564
5.011359163167595	-1306.467282191353
5.014522541302863	-1308.952928825322
5.0176859234519595	-1311.4417230147744
5.02084930960729	-1313.9336667493205
5.02401269976128	-1316.4287620185714
5.0271760939063705	-1318.9270108121375
5.030339492035025	-1321.42841511963
5.0335028941397235	-1323.9329769306585
5.036666300212967	-1326.4406982348337
5.039829710247274	-1328.9515810217672
5.042993124235182	-1331.4656272810687
5.046156542169248	-1333.982839002349
5.049319964042047	-1336.5032181752188
5.052483389846173	-1339.0267667892888
5.055646819574238	-1341.5534868341692
5.058810253218874	-1344.0833802994712
5.061973690772726	-1346.6164491748045
5.0651371322284655	-1349.1526954497804
5.068300577578778	-1351.6921211140084
5.071464026816367	-1354.2347281570997
5.074627479933955	-1356.7805185686652
5.077790936924283	-1359.3294943383153
5.080954397780108	-1361.881657455659
5.084117862494208	-1364.4370099103085
5.087281331059377	-1366.995553691873
5.090444803468429	-1369.5572907899643
5.093608279714192	-1372.122223194192
5.096771759789518	-1374.6903528941668
5.099935243687269	-1377.2616818794993
5.103098731400331	-1379.8362121397986
5.106262222921604	-1382.4139456646772
5.109425718244009	-1384.9948844437438
5.112589217360481	-1387.5790304666102
5.115752720263973	-1390.1663857228848
5.11891622694746	-1392.7569522021802
5.1220797374039275	-1395.350731894105
5.125243251626383	-1397.9477267882717
5.1284067696078495	-1400.5479388742883
5.131570291341368	-1403.1513701417662
5.134733816819996	-1405.7580225803163
5.137897346036807	-1408.367898179547
5.141060878984897	-1410.980998929071
5.144224415657371	-1413.5973268184966
5.147387956047358	-1416.216883837436
5.150551500147997	-1418.8396719754983
5.153715047952451	-1421.4656932222933
5.156878599453896	-1424.0949495674324
5.160042154645522	-1426.7274430005252
5.1632057135205445	-1429.3631755111828
5.166369276072185	-1432.0021490890138
5.169532842293691	-1434.6443657236302
5.172696412178318	-1437.289827404641
5.175859985719347	-1439.9385361216578
5.179023562910066	-1442.5904938642896
5.182187143743786	-1445.2457026221462
5.185350728213833	-1447.9041643848393
5.188514316313546	-1450.5658811419778
5.191677908036287	-1453.230854883173
5.194841503375427	-1455.8990875980332
5.198005102324359	-1458.5705812761714
5.201168704876486	-1461.2453379071947
5.204332311025233	-1463.923359480716
5.207495920764038	-1466.6046479863442
5.210659534086353	-1469.2892054136883
5.213823150985651	-1471.9770337523605
5.216986771455416	-1474.6681349919688
5.220150395489153	-1477.3625111221259
5.223314023080376	-1480.060164132439
5.226477654222622	-1482.7610960125207
5.229641288909439	-1485.4653087519803
5.232804927134387	-1488.1728043404264
5.235968568891052	-1490.8835847674711
5.239132214173027	-1493.597652022723
5.242295862973926	-1496.315008095794
5.24545951528737	-1499.0356549762914
5.248623171107008	-1501.7595946538277
5.251786830426491	-1504.4868291180114
5.254950493239497	-1507.2173603584538
5.258114159539712	-1509.9511903647642
5.261277829320835	-1512.6883211265517
5.264441502576591	-1515.4287546334283
5.267605179300706	-1518.1724928750023
5.270768859486935	-1520.9195378408845
5.273932543129039	-1523.669891520684
5.2770962302207955	-1526.4235559040128
5.280259920755998	-1529.180532980478
5.283423614728456	-1531.940824739692
5.28658731213199	-1534.704433171264
5.289751012960439	-1537.4713602648028
5.292914717207657	-1540.2416080099204
5.29607842486751	-1543.0151783962242
5.29924213593388	-1545.7920734133268
5.302405850400661	-1548.572295050836
5.305569568261769	-1551.3558452983627
5.308733289511128	-1554.1427261455174
5.311897014142674	-1556.932939581908
5.315060742150367	-1559.7264875971462
5.318224473528171	-1562.5233721808409
5.321388208270074	-1565.3235953226026
5.324551946370069	-1568.12715901204
5.327715687822172	-1570.9340652387648
5.3308794326204065	-1573.744315992385
5.3340431807588145	-1576.5579132625126
5.3372069322314495	-1579.3748590387554
5.340370687032378	-1582.195155310723
5.3435344451556865	-1585.0188040680275
5.346698206595468	-1587.8458073002764
5.349861971345835	-1590.6761669970808
5.353025739400911	-1593.5098851480495
5.356189510754836	-1596.3469637427943
5.3593532854017605	-1599.1874047709225
5.362517063335852	-1602.0312102220453
5.365680844551289	-1604.8783820857725
5.368844629042265	-1607.7289223517125
5.372008416802989	-1610.582833009477
5.375172207827678	-1613.4401160486736
5.378336002110571	-1616.300773458914
5.381499799645914	-1619.164807229807
5.384663600427969	-1622.0322193509626
5.387827404451012	-1624.9030118119906
5.390991211709328	-1627.7771866024996
5.394155022197223	-1630.654745712101
5.397318835909009	-1633.535691130403
5.400482652839018	-1636.420024847016
5.403646472981588	-1639.3077488515498
5.406810296331078	-1642.198865133614
5.409974122881854	-1645.0933756828176
5.413137952628299	-1647.991282488772
5.416301785564808	-1650.8925875410853
5.419465621685784	-1653.7972928293664
5.422629460985656	-1656.7054003432274
5.42579330345885	-1659.6169120722755
5.428957149099819	-1662.5318300061226
5.432120997903019	-1665.4501561343757
5.435284849862925	-1668.3718924466473
5.4384487049740216	-1671.2970409325453
5.441612563230805	-1674.2256035816783
5.4447764246277925	-1677.1575823836588
5.447940289159501	-1680.0929793280939
5.451104156820472	-1683.031796404594
5.454268027605254	-1685.9740356027685
5.457431901508407	-1688.9196989122277
5.460595778524508	-1691.8687883225798
5.463759658648143	-1694.8213058234362
5.466923541873912	-1697.777253404405
5.470087428196427	-1700.7366330550958
5.473251317610315	-1703.699446765119
5.47641521011021	-1706.6656965240832
5.479579105690764	-1709.6353843215988
5.482743004346637	-1712.608512147274
5.485906906072505	-1715.5850819907203
5.489070810863053	-1718.5650958415454
5.492234718712981	-1721.54855568936
5.495398629617	-1724.535463523773
5.4985625435698315	-1727.5258213343932
5.501726460566214	-1730.519631110832
5.504890380600891	-1733.5168948426963
5.508054303668625	-1736.517614519598
5.511218229764187	-1739.5217921311448
5.51438215888236	-1742.5294296669476
5.517546091017941	-1745.5405291166155
5.520710026165734	-1748.5550924697566
5.523873964320563	-1751.5731217159816
5.527037905477256	-1754.594618844899
5.530201849630657	-1757.6195858461203
5.533365796775622	-1760.648024709252
5.536529746907017	-1763.679937423906
5.539693700019719	-1766.71532597969
5.54285765610862	-1769.7541923662147
5.5460216151686215	-1772.796538573089
5.549185577194637	-1775.8423665899213
5.552349542181591	-1778.891678406323
5.555513510124419	-1781.9444760119009
5.55867748101807	-1785.000761396267
5.561841454857506	-1788.0605365490285
5.565005431637695	-1791.123803459797
5.5681694113536215	-1794.190564118179
5.571333394000279	-1797.260820513787
5.574497379572671	-1800.3345746362284
5.577661368065816	-1803.4118284751119
5.580825359474743	-1806.4925840200488
5.58398935379449	-1809.5768432606465
5.587153351020105	-1812.664608186516
5.590317351146654	-1815.755880787265
5.593481354169208	-1818.8506630525053
5.596645360082852	-1821.948956971844
5.5998093688826795	-1825.0507645348898
5.602973380563797	-1828.1560877312545
5.606137395121324	-1831.264928550545
5.609301412550385	-1834.3772889823722
5.612465432846123	-1837.4931710163441
5.615629456003687	-1840.6125766420716
5.618793482018237	-1843.7355078491626
5.621957510884948	-1846.861966627227
5.625121542599	-1849.991954965874
5.628285577155588	-1853.1254748547117
5.631449614549917	-1856.2625282833512
5.634613654777202	-1859.4031172414
5.637777697832669	-1862.547243718469
5.640941743711555	-1865.6949097041656
5.6441057924091105	-1868.846117188101
5.647269843920587	-1872.0008681598829
5.6504338982412605	-1875.1591646091213
5.653597955366406	-1878.321008525425
5.656762015291315	-1881.4864018984026
5.659926078011288	-1884.6553467176655
5.663090143521636	-1887.8278449728193
5.666254211817682	-1891.003898653477
5.669418282894753	-1894.1835097492444
5.672582356748199	-1897.3666802497341
5.675746433373367	-1900.553412144553
5.678910512765622	-1903.7437074233096
5.682074594920338	-1906.9375680756152
5.685238679832898	-1910.134996091077
5.688402767498698	-1913.335993459306
5.691566857913139	-1916.5405621699097
5.694730951071639	-1919.748704212498
5.69789504696962	-1922.96042157668
5.701059145602519	-1926.1757162520653
5.704223246965781	-1929.3945902282621
5.70738735105486	-1932.6170454948788
5.710551457865221	-1935.8430840415267
5.713715567392339	-1939.0727078578132
5.716879679631703	-1942.305918933349
5.720043794578803	-1945.5427192577404
5.72320791222915	-1948.7831108205996
5.726372032578254	-1952.0270956115335
5.729536155621645	-1955.274675620153
5.7327002813548535	-1958.525852836066
5.735864409773427	-1961.7806292488804
5.73902854087292	-1965.0390068482081
5.742192674648895	-1968.300987623655
5.745356811096929	-1971.566573564833
5.748520950212605	-1974.835766661349
5.751685091991517	-1978.108568902814
5.754849236429268	-1981.384982278836
5.758013383521472	-1984.6650087790226
5.761177533263751	-1987.9486503929854
5.764341685651738	-1991.2359091103315
5.767505840681075	-1994.5267869206714
5.770669998347411	-1997.821285813612
5.773834158646412	-2001.119407778765
5.776998321573744	-2004.4211548057372
5.780162487125091	-2007.7265288841393
5.7833266552961415	-2011.0355320035796
5.7864908260825905	-2014.3481661536655
5.7896549994801525	-2017.6644333240088
5.79281917548454	-2020.9843355042158
5.795983354091485	-2024.3078746838978
5.7991475352967194	-2027.6350528526616
5.802311719095993	-2030.9658720001182
5.805475905485057	-2034.300334115875
5.80864009445968	-2037.6384411895424
5.811804286015633	-2040.9801952107287
5.814968480148697	-2044.3255981690409
5.818132676854669	-2047.6746520540914
5.821296876129344	-2051.0273588554855
5.824461077968539	-2054.3837205628356
5.827625282368066	-2057.7437391657486
5.8307894893237595	-2061.1074166538338
5.833953698831455	-2064.4747550167012
5.837117910886996	-2067.845756243957
5.840282125486244	-2071.2204223252124
5.8434463426250565	-2074.5987552500756
5.846610562299313	-2077.9807570081557
5.849774784504892	-2081.366429589061
5.852939009237688	-2084.755774982402
5.856103236493597	-2088.148795177785
5.859267466268533	-2091.5454921648216
5.862431698558412	-2094.9458679331187
5.865595933359156	-2098.349924472285
5.868760170666708	-2101.757663771932
5.871924410477008	-2105.1690878216646
5.87508865278601	-2108.5841986110954
5.8782528975896735	-2112.0029981298303
5.881417144883973	-2115.425488367481
5.884581394664885	-2118.8516713136537
5.887745646928398	-2122.2815489579593
5.890909901670509	-2125.715123290005
5.89407415888722	-2129.1523962994
5.897238418574548	-2132.5933699757543
5.900402680728513	-2136.0380463086744
5.903566945345147	-2139.486427287772
5.906731212420487	-2142.9385149026534
5.909895481950585	-2146.3943111429294
5.913059753931493	-2149.853817998208
5.9162240283592755	-2153.317037458096
5.919388305230009	-2156.783971512206
5.92255258453977	-2160.2546221501434
5.925716866284652	-2163.728991361519
5.928881150460752	-2167.207081135941
5.932045437064176	-2170.6888934630188
5.935209726091039	-2174.1744303323585
5.938374017537466	-2177.6636937335725
5.941538311399586	-2181.156685656268
5.944702607673537	-2184.6534080900524
5.94786690635547	-2188.1538630245373
5.951031207441538	-2191.6580524493284
5.954195510927908	-2195.1659783540367
5.95735981681075	-2198.6776427282693
5.9605241250862475	-2202.193047561637
5.963688435750585	-2205.7121948437466
5.966852748799962	-2209.2350865642074
5.970017064230582	-2212.7617247126295
5.973181382038657	-2216.292111278618
5.97634570222041	-2219.826248251786
5.9795100247720665	-2223.3641376217392
5.9826743496898676	-2226.9057813780882
5.9858386769700545	-2230.4511815104393
5.989003006608881	-2234.0003400084042
5.9921673386026075	-2237.55325886159
5.9953316729475015	-2241.1099400596045
5.998496009639841	-2244.6703855920578
6.001660348675909	-2248.234597448557
6.004824690052	-2251.802577618714
6.007989033764408	-2255.3743280921335
6.011153379809449	-2258.9498508584275
6.014317728183433	-2262.5291479072016
6.017482078882682	-2266.1122212280675
6.020646431903531	-2269.6990728106325
6.023810787242315	-2273.2897046445037
6.026975144895384	-2276.884118719292
6.030139504859088	-2280.482317024604
6.033303867129793	-2284.084301550052
6.036468231703865	-2287.690074285241
6.039632598577681	-2291.2996372197813
6.042796967747627	-2294.9129923432793
6.045961339210095	-2298.530141645347
6.049125712961484	-2302.1510871155915
6.0522900889982	-2305.77583074362
6.055454467316659	-2309.4043745190443
6.058618847913284	-2313.036720431469
6.061783230784504	-2316.672870470507
6.064947615926753	-2320.312826625763
6.068112003336481	-2323.9565908868485
6.0712763930101366	-2327.604165243371
6.074440784944178	-2331.2555516849375
6.077605179135077	-2334.91075220116
6.080769575579302	-2338.5697687816432
6.083933974273337	-2342.2326034159987
6.08709837521367	-2345.899258093834
6.090262778396798	-2349.569734804758
6.093427183819224	-2353.2440355383783
6.096591591477458	-2356.9221622843047
6.0997560013680205	-2360.604117032145
6.102920413487432	-2364.289901771507
6.106084827832227	-2367.9795184920017
6.109249244398947	-2371.6729691832347
6.112413663184135	-2375.3702558348173
6.115578084184347	-2379.0713804363554
6.118742507396143	-2382.7763449774598
6.121906932816092	-2386.4851514477373
6.125071360440768	-2390.197801836798
6.128235790266755	-2393.9142981342497
6.13140022229064	-2397.6346423297
6.134564656509021	-2401.3588364127586
6.1377290929185	-2405.0868823730325
6.140893531515688	-2408.8187822001337
6.144057972297202	-2412.5545378836664
6.147222415259667	-2416.294151413242
6.150386860399714	-2420.0376247784684
6.153551307713982	-2423.784959968953
6.156715757199113	-2427.536158974305
6.159880208851763	-2431.291223784133
6.163044662668588	-2435.0501563880457
6.166209118646253	-2438.8129587756507
6.169373576781434	-2442.5796329365585
6.172538037070809	-2446.3501808603746
6.175702499511064	-2450.1246045367097
6.178866964098892	-2453.902905955172
6.182031430830992	-2457.6850871053684
6.185195899704071	-2461.471149976909
6.188360370714842	-2465.2610965594013
6.1915248438600266	-2469.0549288424554
6.19468931913635	-2472.852648815678
6.197853796540547	-2476.6542584686786
6.201018276069354	-2480.4597597910633
6.204182757719523	-2484.2691547724435
6.2073472414878035	-2488.0824454024278
6.210511727370958	-2491.899633670621
6.21367621536575	-2495.720721566636
6.216840705468956	-2499.5457110800767
6.220005197677353	-2503.3746042005564
6.223169691987728	-2507.207402917679
6.226334188396876	-2511.044109221056
6.229498686901594	-2514.8847251002953
6.232663187498689	-2518.729252545003
6.235827690184973	-2522.5776935447907
6.238992194957263	-2526.430050089264
6.242156701812387	-2530.286324168034
6.245321210747177	-2534.1465177707064
6.2484857217584695	-2538.0106328868924
6.2516502348431064	-2541.8786715061974
6.254814749997945	-2545.750635618233
6.257979267219838	-2549.626527212605
6.261143786505651	-2553.506348278922
6.264308307852252	-2557.3901008067937
6.267472831256519	-2561.277786785827
6.270637356715336	-2565.169408205632
6.273801884225587	-2569.064967055816
6.276966413784173	-2572.9644653259875
6.28013094538799	-2576.867905005754
6.283295479033951	-2580.775288084725
6.286460014718967	-2584.68661655251
6.289624552439958	-2588.6018923987135
6.2927890921938525	-2592.521117612948
6.295953633977578	-2596.444294184819
6.29911817778808	-2600.371424103937
6.302282723622298	-2604.3025093599067
6.3054472714771865	-2608.2375519423417
6.308611821349701	-2612.176553840847
6.311776373236804	-2616.11951704503
6.314940927135467	-2620.0664435445024
6.318105483042662	-2624.0173353288687
6.321270040955375	-2627.9721943877416
6.324434600870588	-2631.931022710725
6.3275991627853	-2635.89382228743
6.330763726696507	-2639.860595107463
6.333928292601216	-2643.8313431604347
6.33709286049644	-2647.8060684359525
[truncated: 8,000 more rows]
