# Supplementary material for: Critical Phenomena of Charged AdS Black Holes in Rastall Gravity
Source: Hindawi journal article supplement (doi:10.1155/2020/4065254), 2020-01-24
Supplement: f1 [file 4065254.f1.zip › Fig4-PT1.dat]

Graphics[{{}, {{{}, {}, {Hue[0.67, 0.6, 0.6], Directive[PointSize[7/360], AbsoluteThickness[1.6], RGBColor[1, 0, 0]], Line[{{0.2938362, 289.8545}, {0.29386, 290.}, {0.294465, 294.}, {0.29492, 297.}, {0.29537, 300.}, {0.29541, 300.265}}]}, {Hue[0.9060679774997897, 0.6, 0.6], Directive[PointSize[7/360], RGBColor[0.880722, 0.611041, 0.142051], AbsoluteThickness[1.6], Thickness[Large]], Line[{{0.2938362, 289.8545}, {0.2946, 292.}, {0.295316, 294.}, {0.29637, 297.}, {0.297419, 300.}, {0.29751, 300.265}, {0.298452, 303.}, {0.29948, 306.}, {0.30151, 312.}, {0.30284, 316.}, {0.304155, 320.}, {0.30546, 324.}, {0.30673, 328.}, {0.307685, 331.}, {0.30893, 335.}, {0.31048, 340.}, {0.312, 345.}, {0.313198, 349.}, {0.314381, 353.}, {0.3153, 356.}}]}}}, {}, {}, {}, {}}, {DisplayFunction -> Identity, PlotRangePadding -> {{0, 0}, {0, 0}}, AxesOrigin -> {0.29019999999999996, 280.45}, PlotRange -> {{0.29, 0.33}, {280, 370}}, PlotRangeClipping -> True, ImagePadding -> All, DisplayFunction -> Identity, AspectRatio -> GoldenRatio^(-1), Axes -> {True, True}, AxesLabel -> {T, P}, AxesOrigin -> {0.29019999999999996, 280.45}, DisplayFunction :> Identity, Frame -> {{False, False}, {False, False}}, FrameLabel -> {{None, None}, {None, None}}, FrameTicks -> {{Automatic, Automatic}, {Automatic, Automatic}}, GridLines -> {None, None}, GridLinesStyle -> Directive[GrayLevel[0.5, 0.4]], Method -> {"CoordinatesToolOptions" -> {"DisplayFunction" -> ({(Identity[#1] & )[#1[[1]]], (Identity[#1] & )[#1[[2]]]} & ), "CopiedValueFunction" -> ({(Identity[#1] & )[#1[[1]]], (Identity[#1] & )[#1[[2]]]} & )}}, PlotRange -> {{0.29, 0.33}, {280, 370}}, PlotRangeClipping -> True, PlotRangePadding -> {{0, 0}, {0, 0}}, Ticks -> {Automatic, Automatic}}]
