# Supplementary material for: Critical Phenomena of Charged AdS Black Holes in Rastall Gravity
Source: Hindawi journal article supplement (doi:10.1155/2020/4065254), 2020-01-24
Supplement: f1 [file 4065254.f1.zip › Fig5(b)-GT1.dat]

-3175.1395434216643	3.0024998396842473
-393.9054512367424	1.5049987741891973
-115.23553823562611	1.0074960020796246
-47.74070635235325	0.7599907922030529
-23.86616015463945	0.6124824668720668
-13.401928258664213	0.5149703929951933
-8.133766043298003	0.44602540491001047
-5.211481771412657	0.39493265742840966
-3.4702291936049647	0.35573924177493255
-2.3742048027548224	0.32487323074605534
-1.6538306230884179	0.3000614256217005
-1.163573439744441	0.2797882289490729
-0.820269027190002	0.2630042678266454
-0.5741128587403773	0.24895989250763811
-0.39408287352399135	0.23710527522482217
-0.2601994478802661	0.2270279716781291
-0.1592193952811892	0.21841251941217968
-0.08214254778736521	0.21101350320514256
-0.022716871860243515	0.20463712595675962
0.02348546889716617	0.1991283081656086
0.05965473675974748	0.19436147314458863
0.08812509925505405	0.19023384524969636
0.1106280794892838	0.186660496300261
0.12846422821870634	0.18357063030844095
0.14262145436561274	0.18090475979730564
0.15385789477710926	0.17861253366947255
0.16276079826735584	0.17665104771012893
0.16978892650287047	0.17498351706959692
0.17530346146711134	0.17357822335433704
0.1795907905502654	0.17240767225394454
0.1828794799728372	0.17144791416626312
0.18535304182674903	0.17067799216699275
0.18715962392399332	0.17007949031328767
0.18841942600917588	0.16963616162609252
0.18923042038178056	0.16933361981703077
0.189672796977027	0.16915908236646895
0.1898124410482745	0.169101155238927
0.1897036715206955	0.16914965156693135
0.18939141023837366	0.1692954382074368
0.1889129101570256	0.1695303052940472
0.18829913953049585	0.16984685485976894
0.18757589616043388	0.17023840535264717
0.18676470861773617	0.17069890945777416
0.18588356843570966	0.17122288310939354
0.1849475274982367	0.17180534395300953
0.18396918739337143	0.1724417578200024
0.1829591017862351	0.17312799202189855
0.18192610845444998	0.17386027447022534
0.18087760420721144	0.17463515779015282
0.17981977323968162	0.1754494877291868
0.17875777738148682	0.17630037527176592
0.1776959150491801	0.17718517196123065
0.1766377544073416	0.17810144800586794
0.17558624520525254	0.17904697280842832
0.17454381292745924	0.18001969761094963
0.17351243823218568	0.18101773999073198
0.17249372411679154	0.1820393699803711
0.17148895281740914	0.18308299761606892
0.17049913409952977	0.18414716174497636
0.16952504631121496	0.18523051994488068
0.16856727133783828	0.18633183942877765
0.16762622440661057	0.18744998882330793
0.16670217953249178	0.18858393072412766
0.16579529126800654	0.18973271494339095
0.16490561331279452	0.1908954723749578
0.16403311445031488	0.19207140941194917
0.16317769220565748	0.19325980285907307
0.1623391845572125	0.19445999528891417
0.16151737998383411	0.19567139079726362
0.1607120260863482	0.19689345111769835
0.15992283698634857	0.19812569206009514
0.159149499675037	0.19936768024168725
0.158391679459415	0.20061903008270654
0.1576490246316531	0.2018794010416734
0.15692117046927612	0.20314849506805382
0.15620774265839577	0.2044260542523446
0.15550836021912265	0.20571185865571762
0.1548226380011551	0.20700572430318226
0.1541501888080447	0.20830750132584955
0.1534906252005317	0.20961707223931797
0.15284356102241126	0.2109343503464833
0.15220861268645575	0.21225927825421181
0.15158540025282227	0.21359182649433384
0.15097354832800508	0.21493199224032045
0.15037268680862537	0.21627979811181758
0.14978245149111424	0.21763529105993856
0.14920248456554855	0.21899854132686655
0.14863243500948686	0.2203696414739039
0.14807195889556776	0.2217487054726297
0.1475207196248281	0.22313586785430267
0.14697838809613545	0.2245312829130685
0.1464446428207735	0.2259351239589208
0.14591916999004279	0.22734758261670762
0.14540166350271758	0.22876886816779285
0.14489182495830982	0.23019920693126494
0.14438936362131966	0.23163884168184407
0.1438939963609775	0.2330880311018729
0.14340544757039625	0.2345470492649866
0.14292344906854115	0.2360161851492558
0.14244773998797788	0.2374957421777666
0.14197806665097085	0.23898603778476582
0.14151418243616226	0.24048740300564397
0.1410558476377665	0.2420001820891634
0.14060282931895457	0.24352473213045903
0.14015490116087526	0.24506142272345155
0.13971184330856287	0.2466106356314165
0.13927344221480636	0.24817276447454292
0.1388394904829045	0.24974821443340306
0.13840978670909704	0.2513374019673338
0.1379841353253483	0.25294075454680065
0.1375623464430562	0.2545587103988839
0.13714423569817197	0.256191718265084
0.1367296240981389	0.2578402371707056
0.13631833787099062	0.2595047362051236
0.1359102083168894	0.2611856943122898
0.13550507166233622	0.26288360009087686
0.13510276891723694	0.2645989516035017
0.13470314573497233	0.26633225619450385
0.1343060522755843	0.26808403031579287
0.1339113430721625	0.269854799360308
0.13351887690049014	0.27164509750266513
0.13312851665198572	0.27345546754659283
0.1327401292099581	0.27528646077878427
0.1323535853291785	0.2771386368288174
0.13196875951875608	0.27901256353481546
0.13158552992829473	0.2809088168145419
0.13120377823729729	0.2828279805416437
0.1308233895477759	0.28477064642677097
0.13044425228002013	0.2867374139033224
0.1300662580714677	0.28872889001757696
0.1296893016786209	0.2907456893229897
0.12931328088194316	0.29278843377844016
0.12893809639367348	0.29485775265023717
0.12856365176848814	0.29695428241769295
0.128189853316942	0.2990786666820916
0.12781661002161762	0.3012315560788862
0.1274438334559121	0.30341360819297103
0.12707143770538887	0.30562548747687796
0.1266993392916242	0.3078678651717631
0.12632745709847606	0.31014141923104993
0.1259557123007059	0.31244683424660546
0.1255840282948826	0.31478480137733456
0.1252123306325011	0.317156018280081
0.12484054695524596	0.31956118904272857
0.1244686069323358	0.3220010241194089
0.12409644219988192	0.32447624026771676
0.12372398630219736	0.326987560487848
0.12335117463499495	0.32953571396357473
0.12297794439041318	0.33212143600497945
0.12260423450381028	0.3347454679928704
0.1222299856022694	0.3374085573248096
0.12185513995475827	0.34011145736268356
0.12147964142388948	0.34285492738175316
0.12110343541922752	0.34563973252112185
0.12072646885209193	0.3484666437355626
0.12034869009180624	0.35133643774865037
0.11997004892334498	0.3542498970071462
0.11959049650633063	0.35720780963658283
0.119209985335337	0.36021096939800595
0.11882846920145329	0.3632601756458234
0.1184459031550682	0.36635623328672207
0.11806224346983092	0.36949995273960873
0.11767744760775145	0.37269214989653715
0.11729147418539992	0.3759336460845847
0.11690428294116939	0.37922526802864137
0.11651583470356505	0.38256784781507946
0.11612609136048563	0.38596222285626824
0.11573501582946408	0.3894092358559058
0.11534257202883427	0.39290973477513924
0.11494872484979289	0.39646457279943903
0.11455344012932717	0.4000746083062103
0.11415668462397766	0.40374070483310487
0.11375842598440972	0.40746373104701855
0.11335863273076585	0.4112445607137434
0.11295727422877253	0.41508407266825675
0.11255432066657677	0.418983150785623
0.1121497430322877	0.42294268395248863
0.11174351309220018	0.42696356603915175
0.11133560336967716	0.4310466958721833
0.11092598712466928	0.43519297720758654
0.1105146383338505	0.43940331870447663
0.11010153167134994	0.4436786338992569
0.10968664249005863	0.44801984118028937
0.10926994680349478	0.4524278637630291
0.10885142126820702	0.45690362966561754
0.10843104316669881	0.46144807168491914
0.10800879039085753	0.46606212737298364
0.10758464142587087	0.4707467390139269
0.10715857533461504	0.4755028536012104
0.10673057174250017	0.4803314228153165
0.10630061082275671	0.4852334030017999
0.10586867328214994	0.4902097551497076
0.10543474034710801	0.49526144487035806
0.10499879375025073	0.5003894423764639
0.10456081571730585	0.5055947224615975
0.10412078895440126	0.5108782644799789
0.10367869663571921	0.5162410523265853
0.10323452239150434	0.5216840744175698
0.10278825029641087	0.5272083236709801
0.10233986485818064	0.532814797487774
0.10188935100664029	0.538504497733113
0.10143669408300839	0.5442784307179419
0.10098187982950252	0.5501376071808304
0.10052489437923624	0.5560830422700851
0.10006572424639887	0.5621157555261116
0.0996043563167065	0.5682367708640303
0.09914077783811873	0.5744471165565324
0.09867497641181089	0.5807478252169742
0.09820693998339486	0.5871399337827048
0.09773665683438071	0.593624483498614
0.09726411557387168	0.600202519900905
0.09678930513048521	0.6068750928010769
0.0963122147444939	0.6136432562701222
0.09583283396017908	0.6205080686229204
0.09535115261839067	0.6274705924028419
0.09486716084930699	0.6345318943665336
0.0943808490653894	0.6416930454689065
0.09389220795452494	0.6489551208482991
0.09340122847335158	0.6563191998118317
0.09290790184076095	0.6637863658209283
0.09241221953157334	0.6713577064770209
0.09191417327037986	0.6790343135074156
0.09141375502554584	0.68681728275133
0.0909109570033726	0.6947077141460893
0.09040577164241112	0.7027067117134821
0.08989819160792512	0.7108153835462715
0.08938820978649668	0.7190348417948582
0.08887581928077298	0.7273662026540906
0.08836101340434763	0.7358105863502239
0.08784378567677523	0.7443691171280152
0.08732412981871274	0.7530429232379656
0.08680203974718617	0.7618331369236945
0.08627750957097738	0.7707408944094499
0.08575053358612908	0.7797673358877462
0.08522110627156365	0.7889136055071352
0.08468922228481235	0.7981808513601026
0.08415487645785297	0.8075702254710819
0.08361806379305185	0.8170828837846009
0.08307877945920802	0.8267199861535345
0.0825370187876958	0.8364826963274822
0.08199277726870405	0.8463721819412581
0.0814460505475685	0.8563896145034965
0.08089683442119576	0.866536169385355
0.0803451248345749	0.8768130258093441
0.07979091787737563	0.8872213668382471
0.07923420978062984	0.8977623793641565
0.07867499691349486	0.9084372540976011
0.07811327578009515	0.9192471855567839
0.07754904301644189	0.9301933720569131
0.07698229538742676	0.9412770156996317
0.07641302978388903	0.9524993223625406
0.07584124321975334	0.9638615016888205
0.07526693282923673	0.975364767076939
0.07469009586412213	0.987010335670454
0.07411072969109876	0.9987994283479009
0.07352883178916444	1.0107332697127762
0.07294439974709091	1.0228130880835948
0.07235743126094908	1.0350401154840405
0.07176792413169308	1.0474155876332
0.0711758762628017	1.0599407439358735
0.07058128565797517	1.0726168274729728
0.06998415041888624	1.0854450849919886
0.06938446874298426	1.098426766897551
0.06878223892135045	1.1115631272420496
0.06817745933660362	1.124855423716344
0.06757012846085422	1.1383049176405389
0.06696024485370626	1.1519128739548405
0.06634780716030589	1.1656805612104766
0.06573281410943393	1.1796092515606942
0.065115264511644	1.1937002207518277
0.06449515725744215	1.2079547481144282
0.0638724913155091	1.2223741165544744
0.06324726573096309	1.236959612544636
0.06261947962366153	1.251712526115612
0.061989132186543026	1.266634150847533
0.06135622268400556	1.281725783861426
0.060720750450322	1.2969887258107464
0.060082714888092144	1.312424280872962
0.05944211546672805	1.3280337567412157
0.058798951720975684	1.3438184646160274
0.05815322324946759	1.3597797191970806
0.05750492971331002	1.3759188386750463
0.05685407083469948	1.3922371447234714
0.056200646395572595	1.4087359624907378
0.05554465623628409	1.425416620592058
0.054886100254314896	1.4422804511015401
0.05422497840300912	1.4593287895442972
0.05356129069033861	1.476562974888635
0.05289503717769428	1.4939843495382514
0.052226217978705886	1.5115942593245346
0.051554833258085395	1.5293940534988844
0.05088088323049697	1.5473850847250947
0.050204368159452215	1.5655687090717851
0.04952528835622781	1.5839462860048867
0.04884364417880884	1.602519178380168
0.04815943603085339	1.6212887524358333
0.04747266436068011	1.6402563777851293
0.046783329660278566	1.6594234274090465
0.04609143246433979	1.6787912776490272
0.04539697334930787	1.698361308199756
0.04469995293245328	1.7181349021019603
0.04400037187096404	1.7381134457352911
0.0432982308610584	1.7582983288112204
0.04259353063711492	1.7786909443660095
0.04188627197082259	1.7992926887536909
0.04117645567034685	1.820104961639125
0.04046408257951621	1.8411291659910796
0.03974915357702404	1.8623667080753616
0.039031669575648215	1.8838189974479778
0.038311631521486395	1.9054874469483605
0.037589040393208824	1.9273734726926088
0.036863897201326185	1.9494784940667893
0.03613620298747139	1.9718039337202677
0.03540595882370017	1.9943512175590836
0.03467316581180177	2.0171217747393633
0.03393782508262794	2.0401170376607687
0.033199937795433676	2.063338441959997
0.032459505137232225	2.086787426504301
0.031716528322164	2.1104654333850563
0.03097100859087879	2.134373907911371
0.030222947209928876	2.158514298603725
0.02947234547117794	2.1828880571876375
0.028719204691218896	2.2074966385873944
0.027963526210806118	2.2323415009197918
0.02720531139429858	2.2574241054879165
0.026444561629114065	2.282745916774969
0.025681278325194946	2.308308402438126
0.02491546291448536	2.334113033302411
0.024147116850418055	2.3601612833546293
0.023376241607413323	2.3864546297373277
0.02260283868038599	2.41299455274277
0.0218269095842651	2.439782535806974
0.02104845585352065	2.4668200655037555
0.020267479041702396	2.4941086315388175
0.019483980720986407	2.5216497267438833
0.018697962481730893	2.549444847070823
0.017909425932042828	2.5774954915858537
0.017118372697351204	2.6058031624637525
0.016324804419989233	2.63436936498209
0.015528722758786303	2.6631956075155148
0.01473012938866736	2.692283401530047
0.013929026000259706	2.7216342615774387
0.01312541429950928	2.7512497052894953
0.012319296007302246	2.781131253372518
0.011510672859097248	2.811280429601682
0.010699546604562727	2.8416987608155204
0.009885919007221987	2.8723877769103874
0.009069791844105782	2.903349010834973
0.0082511669054122	2.9345839985848365
0.007430045994171387	2.966094279196971
0.006606430925920035	2.9978813947443945
0.0057803235283795	3.0299468903307716
0.00495172564114171	3.0622923140850498
0.0041206391153614415	3.0949192171561517
0.003287065813454372	3.1278291537076504
0.002451007608800248	3.161023680912507
0.0016124663854540817	3.1945043589478246
0.0007714440378605442	3.2282727509896225
-0.00007205752942377949	3.2623304232076293
-0.0009180364020040591	3.296678944760128
-0.0017664906559150886	3.331319887788794
-0.00261741835788374	3.3662548274135875
-0.003470817565586218	3.4014853417276494
-0.0043266863279005155	3.4370130117922146
-0.005185022685153699	3.4728394216315985
-0.006045824669364236	3.5089661582281355
-0.006909090304479906	3.545394811517203
-0.007774817606610751	3.582126974382238
-0.008643004584257347	3.619164242649778
-0.009513649238534712	3.6565082150845463
-0.010386749563392552	3.694160493384522
-0.01126230354582974	3.7321226821760836
-0.012140309166105919	3.7703963890091305
-0.013020764397947793	3.8089832243522443
-0.01390366720875251	3.8478848015878873
-0.014789015559786782	3.8871027370075866
-0.015676807406381103	3.9266386498071855
-0.016567040698121555	3.9664941620820744
-0.017459713379037334	4.00667089882248
-0.018354823387783815	4.047170487908739
-0.019252368657824086	4.087994560106632
-0.020152347117604268	4.129144749062705
-0.021054756690727428	4.1706226912996325
-0.021959595296123516	4.212430026211586
-0.0228668608482158	4.254568396059661
-0.02377655125708434	4.2970394459672505
-0.02468866442862583	4.339844823915519
-0.02560319826471043	4.382986180738852
-0.026520150663336704	4.426465170120329
-0.027439519518781312	4.470283448587226
-0.02836130272174795	4.51444267550654
-0.02928549815951193	4.558944513080522
-0.03021210371606295	4.603790626342231
-0.0311411172722441	4.6489826831511145
-0.03207253670588923	4.694522354188613
-0.033006359891956306	4.740411312953762
-0.03394258470266008	4.786651235758828
-0.034881209007599834	4.833243801724973
-0.03582223067388668	4.880190692777909
-0.03676564756626706	4.927493593643602
-0.03771145754724484	4.975154191843969
-0.03865965847719985	5.023174177692607
-0.03961024821450525	5.071555244290552
-0.04056322461564171	5.12029908752201
-0.041518585535310217	5.169407406050164
-0.04247632882654201	5.218881901312963
-0.04343645234080634	5.2687242775189365
-0.04439895392811657	5.318936241643016
-0.045363831437134045	5.369519503422404
-0.04633108271527028	5.4204757753524335
-0.04730070560878523	5.47180677268245
-0.048272697962887495	5.523514213411703
-0.04924705762182736	5.57559981828528
-0.050223782428993474	5.628065310790026
-0.05120287022700375	5.680912417150505
-0.052184318857795536	5.734142866324974
-0.053168126162714574	5.787758390001327
-0.054154289982602195	5.841760722593152
-0.05514280815787964	5.896151601235703
-0.056133678528632505	5.950932765781959
-0.05712689893469087	6.006105958798626
-0.058122467215711716	6.0616729255622745
-0.05912038121125594	6.117635414055347
-0.060120638760865604	6.173995174962305
-0.06112323770414002	6.230753961665692
-0.062128175880808816	6.2879135302423
-0.06313545113080582	6.345475639459284
-0.06414506129433914	6.403442050770343
-0.06515700421196041	6.46181452831184
-0.0661712777246344	6.520594838899053
-0.06718787967380524	6.579784752022336
-0.06820680790146148	6.639386039843348
-0.06922806025020131	6.699400477191253
-0.07025163456329458	6.759829841559008
-0.07127752868474553	6.820675913099603
-0.07230574045935245	6.88194047462233
-0.07333626773276682	6.943625311589063
-0.07436910835155194	7.005732212110587
-0.07540426016323956	7.068262966942882
-0.07644172101638512	7.131219369483483
-0.07748148876062325	7.1946032157678035
-0.0785235612467195	7.25841630446547
-0.07956793632662518	7.322660436876762
-0.08061461185352659	7.3873374169289265
-0.08166358568189587	7.452449051172632
-0.08271485566754025	7.517997148778311
-0.08376841966765042	7.58398352153266
-0.08482427554084752	7.650409983835036
-0.08588242114722897	7.717278352693915
-0.08694285434841434	7.784590447723359
-0.08800557300758911	7.852348091139487
-0.08907057498954857	7.920553107756983
-0.09013785816073983	7.989207324985593
-0.09120742038930305	8.0583125728266
-0.09227925954511332	8.127870683869428
-0.09335337349981909	8.197883493288142
-0.09442976012688284	8.268352838837988
-0.09550841730161638	8.33928056085198
-0.09658934290122151	8.410668502237485
-0.0976725348048248	8.482518508472802
-0.09875799089351289	8.554832427603774
-0.09984570905036855	8.627612110240388
-0.10093568716050438	8.700859409553427
-0.10202792311109642	8.774576181271085
-0.10312241479141661	8.848764283675642
-0.10421916009286533	8.92342557760013
-0.10531815690900191	8.998561926424951
-0.10641940313557591	9.074175196074663
-0.10752289667055698	9.150267255014587
-0.10862863541416444	9.226839974247588
-0.1097366172688942	9.30389522731074
-0.11084684013954932	9.3814348902721
-0.11195930193326548	9.459460841727442
-0.11307400055953815	9.537974962797
-0.11419093393024868	9.616979137122252
-0.1153100999596906	9.696475250862695
-0.11643149656459287	9.776465192692642
-0.11755512166414633	9.856950853798006
-0.11868097318002514	9.937934127873111
-0.11980904903641203	10.019416911117553
-0.12093934716001993	10.101401102232986
-0.12207186548011446	10.183888602420009
-0.12320660192853464	10.266881315374972
-0.12434355443971554	10.350381147286898
-0.12548272095070753	10.434390006834326
-0.1266240994011975	10.518909805182206
-0.12776768773352654	10.603942455978787
-0.12891348389271154	10.689489875352567
-0.13006148582646196	10.775553981909148
-0.13121169148519846	10.86213669672822
-0.1323640988220708	10.949239943360476
-0.1335187057929754	11.036865647824557
-0.1346755103565711	11.125015738604038
-0.13583451047429657	11.213692146644373
-0.13699570411038628	11.30289680534988
-0.13815908923188414	11.392631650580736
-0.13932466380866204	11.48289862064999
-0.14049242581343108	11.573699656320546
-0.1416623732217585	11.665036700802208
-0.1428345040120798	11.756911699748688
-0.1440088161657131	11.849326601254662
-0.1451853076668733	11.942283355852805
-0.1463639765026823	12.0357839165109
-0.1475448206631839	12.129830238628795
-0.14872783814135462	12.22442428003561
-0.14991302693311592	12.319568000986736
-0.15110038503734596	12.415263364160987
-0.15228991045588922	12.51151233465765
-0.15348160119356813	12.608316879993652
-0.15467545525819473	12.705678970100656
-0.15587147066057866	12.803600577322225
-0.15706964541453733	12.902083676410895
-0.15826997753690664	13.001130244525438
-0.1594724650475489	13.10074226122792
-0.16067710596936263	13.200921708480912
-0.16188389832829003	13.301670570644712
-0.16309284015332584	13.40299083447444
-0.16430392947652583	13.504884489117323
-0.16551716433301344	13.607353526109836
-0.16673254276098898	13.710399939375007
-0.1679500628017337	13.814025725219489
-0.16916972249962034	13.918232882330964
-0.17039151990211793	14.02302341177526
-0.17161545305979792	14.12839931699366
-0.17284152002634043	14.234362603800145
-0.17406971885854128	14.340915280378656
-0.17530004761631707	14.448059357280359
-0.17653250436271045	14.555796847420998
-0.1777670871638946	14.664129766078046
-0.17900379408917974	14.773060130888162
-0.18024262321101706	14.882589961844417
-0.18148357260500328	14.992721281293589
-0.18272664034988514	15.103456113933566
-0.1839718245275633	15.214796486810599
-0.18521912322309703	15.326744429316694
-0.1864685345247064	15.439301973186991
-0.187720056523777	15.552471152496992
-0.1889736873148635	15.666254003660086
-0.1902294249956918	15.780652565424814
-0.19148726766716204	15.89566887887232
-0.19274721343335266	16.011304987413652
-0.19400926040152103	16.127562936787267
-0.19527340668210746	16.244444775056365
-0.1965396503887366	16.361952552606297
-0.19780798963821966	16.480088322142073
-0.19907842255055608	16.598854138685645
-0.20035094724893618	16.718252059573473
-0.2016255618597407	16.838284144453933
-0.20290226451254495	16.958952455284734
-0.20418105334011702	17.08025905633037
-0.2054619264784218	17.20220601415967
-0.20674488206661948	17.324795397643186
-0.208029918247068	17.448029277950724
-0.2093170331653222	17.57190972854877
-0.21060622497013592	17.696438825198072
-0.21189749181346076	17.8216186459511
-0.21319083185044796	17.947451271149554
-0.21448624323944704	18.073938783421845
-0.21578372414200586	18.20108326768072
-0.21708327272287176	18.32888681112069
-0.21838488714998996	18.45735150321567
-0.21968856559450275	18.5864794357164
-0.22099430623075061	18.7162727026481
-0.2223021072362706	18.846733400308032
-0.22361196679179446	18.977863627262987
-0.22492388308124986	19.109665484346937
-0.2262378542917574	19.24214107465858
-0.2275538786136314	19.375292503558914
-0.22887195424037615	19.509121878668903
-0.23019207936868702	19.64363130986702
-0.23151425219844757	19.77882290928681
-0.23283847093272808	19.914698791314652
-0.23416473377778468	20.05126107258722
-0.23549303894305662	20.18851187198925
-0.23682338464116445	20.326453310651047
-0.2381557690879094	20.465087511946244
-0.2394901905022695	20.604416601489383
-0.2408266471063986	20.74444270713361
-0.24216513712562313	20.885167958968275
-0.2435056587884416	21.02659448931667
-0.24484821032651982	21.168724432733672
-0.24619278997469057	21.31155992600347
-0.24753939597094873	21.45510310813715
-0.24888802655645112	21.599356120370484
-0.2502386799755123	21.744321106161603
-0.25159135447560144	21.890000211188756
-0.25294604830733997	22.036395583347865
-0.25430275972449934	22.183509372750446
-0.25566148698399627	22.3313437317212
-0.25702222834589145	22.479900814795798
-0.2583849820733844	22.62918277871867
-0.25974974643281207	22.779191782440563
-0.26111651969364474	22.929929987116545
-0.2624853001284821	23.08139955610357
-0.26385608601305044	23.233602654958375
-0.26522887562619896	23.38654145143512
-0.26660366724989604	23.540218115483253
-0.2679804591692256	23.69463481924531
-0.2693592496723849	23.84979373705462
-0.27074003705067695	24.00569704543315
-0.27212281959851065	24.162346923089316
-0.2735075956133955	24.319745550915755
-0.2748943633959369	24.47789511198717
-0.2762831212498327	24.6367977915581
-0.27767386748186984	24.796455777060793
-0.2790666004019193	24.956871258103025
-0.28046131832293225	25.118046426465956
-0.2818580195609357	25.279983476101858
-0.28325670243502904	25.442684603132093
-0.28465736526737884	25.60615200584495
-0.2860600063832154	25.770387884693452
-0.2874646241108261	25.935394442293177
-0.2888712167815548	26.101173883420284
-0.29027978272979393	26.267728415009238
-0.2916903202929824	26.4350602461508
-0.2931028278115985	26.60317158808976
-0.2945173036291578	26.77206465422301
-0.2959337460922075	26.94174166009737
-0.2973521535503215	27.11220482340744
-0.2987725243560959	27.283456363993565
-0.3001948568651439	27.455498503839713
-0.3016191494360925	27.628333467071446
-0.30304540043057554	27.80196347995379
-0.304473608213231	27.97639077088925
-0.30590377115169365	28.15161757041555
-0.3073358876165927	28.327646111203848
-0.30876995598154505	28.50447862805645
-0.3102059746231521	28.682117357904946
-0.3116439419209917	28.86056453980794
-0.31308385625761626	29.03982241494926
-0.3145257160185468	29.21989322663577
-0.3159695195922665	29.400779220295366
-0.31741526537021725	29.582482643474997
-0.3188629517467935	29.765005745838597
-0.32031257711933814	29.948350779165132
-0.3217641398881357	30.132519997346524
-0.32321763845640866	30.317515656385694
-0.3246730712303115	30.503340014394542
-0.3261304366189252	30.68999533159199
-0.32758973303425337	30.877483870301983
-0.3290509588912147	31.065807894951448
-0.330514112607639	31.254969672068384
-0.3319791926042623	31.444971470279874
-0.33344619730472075	31.635815560310153
-0.3349151251355451	31.827504214978546
-0.33638597452615515	32.0200397091976
-0.3378587439088555	32.21342431997111
-0.33933343171882907	32.407660326392175
-0.340810036394132	32.60275000964123
-0.34228855637568756	32.79869565298412
-0.3437689901072822	32.99549954177019
-0.3452513360355577	33.19316396343034
-0.34673559261000897	33.391691207475105
-0.34822175828297425	33.5910835654927
-0.3497098315096337	33.79134333114717
-0.3511998107480012	33.99247280017646
-0.3526916944589201	34.19447427039047
-0.3541854811060564	34.3973500416692
-0.35568116915589454	34.601102415960845
-0.35717875707773084	34.80573369727988
-0.3586782433436689	35.011246191705254
-0.3601796264286121	35.217642207378354
-0.3616829048102601	35.42492405450135
-0.3631880769691021	35.633094045335056
-0.36469514138841075	35.842154494197324
-0.36620409655423825	36.05210771746097
-0.3677149409554081	36.26295603355206
-0.369227673083512	36.474701762948015
-0.3707422914329022	36.6873472281757
-0.37225879450068766	36.90089475380967
-0.3737771807867256	37.11534666647026
-0.37529744879361926	37.33070529482176
-0.3768195970267095	37.546972969570675
-0.3783436239940705	37.764152023463744
-0.3798695282065026	37.98224479128624
-0.38139730817752865	38.20125360986006
-0.3829269624233872	38.42118081804202
-0.38445848946302535	38.64202875672194
-0.3859918878180959	38.86379976882089
-0.3875271560129492	39.086496199289385
-0.3890642925746287	39.310120395105585
-0.3906032960328651	39.53467470527351
-0.39214416492006965	39.76016148082117
-0.39368689777132937	39.98658307479895
-0.3952314931244008	40.21394184227768
-0.39677794951970535	40.44224014034695
-0.39832626550032135	40.6714803281132
-0.3998764396119803	40.901664766698154
-0.40142847040306	41.132795819236904
-0.40298235642458025	41.36487585087628
-0.4045380962301939	41.59790722877285
-0.4060956883761854	41.83189232209147
-0.40765513142146204	42.06683350200337
-0.4092164239275482	42.30273314168444
-0.41077956445858166	42.53959361631351
-0.41234455158130584	42.777417303070486
-0.4139113838650648	43.0162065811349
-0.41548005988179826	43.25596383168391
-0.4170505782060341	43.496691437890696
-0.41862293741488366	43.73839178492271
-0.42019713608803627	43.98106725994002
-0.4217731728077533	44.22472025209353
-0.42335104615886204	44.46935315252333
-0.42493075472874964	44.714968354356884
-0.4265122971073587	44.961568252707444
-0.4280956718871807	45.2091552446724
-0.42968087766324947	45.4577317293314
-0.43126791303313744	45.70730010774476
-0.4328567765969477	45.95786278295188
-0.4344474669573102	46.20942215996942
-0.43603998271937505	46.46198064578971
-0.4376343224908065	46.715540649378944
-0.43923048488177807	46.97010458167573
-0.4408284685049664	47.225674855589226
-0.4424282719755461	47.48225388599764
-0.44402989391118247	47.73984408974641
-0.44563333293202756	47.99844788564666
-0.44723858766071434	48.258067694473525
-0.4488456567223501	48.518705938964516
-0.45045453874451086	48.780365043817845
-0.45206523235723634	49.043047435690795
-0.4536777361930246	49.30675554319812
-0.45529204888682473	49.57149179691036
-0.4569081690760335	49.83725862935228
-0.4585260954004872	50.1040584750011
-0.46014582650245844	50.37189377028515
-0.4617673610266487	50.64076695358193
-0.46339069762018464	50.91068046521675
-0.4650158349326089	51.181636747460914
-0.4666427716158793	51.45363824453034
-0.4682715063243593	51.726687402583735
-0.46990203771481537	52.00078666972117
-0.4715343644464072	52.275938495982345
-0.4731684851806878	52.5521453333451
-0.4748043985815941	52.82940963572376
-0.4764421033154414	53.10773385896768
-0.47808159805091976	53.38712046085935
-0.4797228814590865	53.66757190111324
-0.48136595221336226	53.949090641373886
-0.48301080898952514	54.231679145214535
-0.4846574504657032	54.51533987813536
-0.4863058753223727	54.800075307562125
-0.4879560822423485	55.08588790284445
-0.4896080699107824	55.37278013525444
-0.49126183701515413	55.6607544779849
-0.49291738224526793	55.94981340614787
-0.49457470429324735	56.23995939677322
-0.49623380185352894	56.53119492880688
-0.49789467362285666	56.823522483109535
-0.4995573183002763	57.11694454245481
-0.5012217345871319	57.411463591528
-0.5028879211870572	57.70708211692433
-0.5045558768059737	58.00380260714761
-0.506225600152082	58.30162755260853
-0.5078970899358586	58.60055944562332
-0.50957034487005	58.90060078041206
-0.5112453636696676	59.20175405309735
-0.5129221450519801	59.50402176170254
-0.5146006877365112	59.80740640615046
-0.5162809904450335	60.11191048826188
-0.5179630519015621	60.417536511753895
-0.5196468708323488	60.724286982238425
-0.5213324459658798	61.032164407220904
-0.5230197760328663	61.3411712960986
-0.5247088597662435	61.65131016015922
-0.5263996959011606	61.96258351257931
-0.5280922831749804	62.274993868422946
-0.5297866203272704	62.58854374464016
-0.5314827060997988	62.903235660065384
-0.5331805392365299	63.21907213541618
-0.5348801184836175	63.53605569329146
-0.5365814425894009	63.85418885817037
-0.5382845103043989	64.17347415641065
-0.5399893203813061	64.4939141162471
-0.5416958715749844	64.81551126779017
-0.5434041626424613	65.13826814302467
-0.5451141923429228	65.46218727580812
-0.5468259594377092	65.78727120186937
-0.5485394626903097	66.11352245880704
-0.5502547008663559	66.44094358608831
-0.5519716727336196	66.7695371250474
-0.5536903770620045	67.09930561888389
-0.5554108126235432	67.4302516126616
-0.5571329781923913	67.76237765330708
-0.5588568725448223	68.09568628960798
-0.560582494459224	68.43018007221204
-0.5623098427160892	68.7658615536251
-0.5640389160980165	69.10273328821017
-0.5657697133897007	69.44079783218585
-0.5675022333779306	69.78005774362481
-0.569236474851581	70.12051558245244
-0.5709724366016113	70.46217391044559
-0.572710117421058	70.80503529123088
-0.5744495161050296	71.14910229028366
-0.576190631450704	71.49437747492622
-0.5779334622573196	71.84086341432666
-0.5796780073261754	72.18856267949742
-0.581424265460622	72.53747784329377
-0.5831722354660577	72.88761148041279
-0.5849219161499245	73.23896616739138
-0.5866733063217021	73.5915444826055
-0.5884264047929043	73.94534900626842
-0.5901812103770732	74.30038232042942
-0.5919377218897734	74.65664700897241
-0.5936959381485897	75.01414565761472
-0.5954558579731188	75.37288085390529
-0.5972174801849682	75.73285518722392
-0.598980803607749	76.09407124877941
-0.6007458270670717	76.45653163160841
-0.6025125493905409	76.82023893057404
-0.6042809694077513	77.1851957423645
-0.6060510859502827	77.55140466549176
-0.6078228978516953	77.91886830029024
-0.6095964039475239	78.28758924891525
-0.6113716030752747	78.6575701153419
-0.6131484940744197	79.02881350536369
-0.6149270757863924	79.40132202659105
-0.6167073470545822	79.77509828845027
-0.6184893067243309	80.15014490218168
-0.620272953642927	80.52646448083898
-0.6220582866596023	80.9040596392873
-0.6238453046255256	81.2829329942023
-0.6256340063937987	81.66308716406846
-0.6274243908194523	82.04452476917814
-0.6292164567594409	82.42724843163009
-0.6310102030726378	82.81126077532805
-0.6328056286198328	83.19656442597959
-0.6346027322637228	83.58316201109477
-0.6364015128689121	83.97105615998463
-0.6382019693019065	84.36024950376034
-0.6400041004311052	84.75074467533116
-0.6418079051268022	85.14254430940397
-0.6436133822611769	85.53565104248142
-0.6454205307082918	85.9300675128608
-0.6472293493440888	86.3257963606328
-0.6490398370463815	86.72284022768004
-0.6508519926948542	87.12120175767608
-0.6526658151710552	87.5208835960838
-0.654481303358392	87.92188839015432
-0.6562984561421307	88.32421878892565
-0.6581172724093852	88.72787744322143
-0.6599377510491189	89.13286700564973
-0.661759890952137	89.53919013060158
-0.6635836910110816	89.94684947424992
-0.6654091501204301	90.35584769454817
-0.6672362671764879	90.76618745122903
-0.6690650410773862	91.17787140580329
-0.6708954707230751	91.59090222155824
-0.6727275550153226	92.00528256355689
-0.6745612928577075	92.42101509863637
-0.676396683155616	92.83810249540691
-0.6782337248162382	93.2565474242503
-0.6800724167485623	93.67635255731876
-0.6819127578633712	94.09752056853402
-0.6837547470732382	94.5200541335855
-0.6855983832925214	94.94395592992944
-0.6874436654373627	95.36922863678755
-0.6892905924256789	95.79587493514582
-0.6911391631771622	96.2238975077533
-0.6929893766132723	96.65329903912078
-0.6948412316572345	97.08408221551959
-0.6966947272340335	97.51624972498031
-0.6985498622704117	97.9498042572919
-0.7004066356948624	98.3847485039997
-0.7022650464376268	98.82108515840515
-0.7041250934306907	99.25881691556388
-0.7059867756077796	99.69794647228481
-0.7078500919043534	100.1384765271288
-0.7097150412576038	100.58040978040758
-0.7115816226064506	101.02374893418236
-0.7134498348915352	101.46849669226285
-0.7153196770552184	101.9146557602056
-0.7171911480415764	102.36222884531337
-0.7190642467963957	102.81121865663363
-0.7209389722671704	103.26162790495738
-0.7228153234030961	103.71345930281792
-0.7246932991550683	104.16671556448978
-0.7265728984756755	104.6213994059874
-0.7284541203191983	105.07751354506397
-0.7303369636416034	105.53506070121027
-0.7322214274005394	105.99404359565348
-0.7341075105553347	106.45446495135596
-0.7359952120669908	106.91632749301411
-0.7378845308981806	107.37963394705724
-0.7397754660132444	107.8443870416462
-0.7416680163781846	108.31058950667246
-0.743562180960662	108.7782440737566
-0.7454579587299923	109.24735347624768
-0.7473553486571428	109.71792044922134
-0.7492543497147267	110.1899477294792
-0.7511549608770014	110.66343805554762
-0.7530571811198629	111.13839416767627
-0.7549610094208434	111.6148188078373
-0.756866444759106	112.09271471972382
-0.7587734861154416	112.57208464874905
-0.7606821324722646	113.05293134204517
-0.7625923828136083	113.53525754846162
-0.7645042361251262	114.01906601856487
-0.766417691394079	114.5043595046366
-0.7683327476093396	114.99114076067255
-0.7702494037613836	115.4794125423818
-0.772167658842289	115.9691776071853
-0.7740875118457311	116.46043871421476
-0.7760089617669764	116.9531986243117
-0.7779320076028845	117.447460100026
-0.7798566483518975	117.94322590561507
-0.7817828830140416	118.44049880704243
-0.783710710590922	118.93928157197696
-0.7856401300857181	119.43957696979143
-0.7875711405031797	119.94138777156145
-0.7895037408496248	120.44471675006444
-0.7914379301329348	120.9495666797785
-0.7933737073625531	121.45594033688133
-0.7953110715494754	121.96384049924858
-0.7972500217062541	122.47326994645371
-0.7991905568469885	122.98423145976602
-0.8011326759873246	123.49672782214999
-0.8030763781444501	124.01076181826394
-0.8050216623370907	124.52633623445924
-0.8069685275855066	125.0434538587787
-0.8089169729114905	125.56211748095605
-0.8108669973383597	126.08232989241412
-0.8128185998909586	126.6040938862645
-0.814771779595651	127.12741225730598
-0.8167265354803165	127.65228780202361
-0.8186828665743491	128.17872331858752
-0.820640771908653	128.70672160685177
-0.8226002505156377	129.23628546835354
-0.8245613014292162	129.7674177063117
-0.8265239236848003	130.30012112562616
-0.8284881163192976	130.83439853287598
-0.8304538783711074	131.37025273631912
-0.8324212088801209	131.90768654589118
-0.8343901068877104	132.44670277320395
-0.8363605714367337	132.9873042315447
-0.838332601571525	133.52949373587484
-0.8403061963378936	134.07327410282903
-0.8422813547831233	134.61864815071414
-0.8442580759559615	135.1656186995078
-0.846236358906624	135.71418857085806
-0.8482162026867869	136.26436058808153
-0.8501976063495844	136.81613757616276
-0.8521805689496053	137.369522361753
-0.8541650895428905	137.9245177731695
-0.856151167186929	138.48112664039385
-0.8581388009406519	139.03935179507144
-0.8601279898644347	139.59919607050992
-0.8621187330200892	140.1606623016788
-0.8641110294708629	140.7237533252078
-0.8661048782814338	141.28847197938603
-0.8681002785179083	141.854821104161
-0.8700972292478175	142.42280354113745
-0.8720957295401144	142.99242213357644
-0.87409577846517	143.56367972639404
-0.8760973750947704	144.13657916616071
-0.8781005185021125	144.71112330109978
-0.8801052077618026	145.28731498108684
-0.882111441949852	145.86515705764833
-0.8841192201436747	146.4446523839608
-0.8861285414220821	147.02580381484978
-0.8881394048652829	147.60861420678881
-0.8901518095548767	148.19308641789814
-0.8921657545738533	148.7792233079439
-0.8941812390065879	149.3670277383372
-0.8961982619388384	149.95650257213285
-0.8982168224577437	150.5476506740284
-0.9002369196518174	151.14047491036354
-0.9022585526109487	151.73497814911818
-0.9042817204263952	152.33116325991233
-0.9063064221907823	152.92903311400462
-0.9083326569981003	153.52859058429146
-0.9103604239436983	154.12983854530577
-0.9123897221242854	154.73277987321603
-0.9144205506379242	155.33741744582582
-0.9164529085840288	155.94375414257212
-0.9184867950633635	156.55179284452453
-0.9205222091780366	157.16153643438435
-0.9225591500314994	157.77298779648348
-0.9245976167285417	158.38614981678353
-0.9266376083752915	159.00102538287484
-0.9286791240792082	159.61761738397496
-0.930722162949083	160.23592871092853
-0.9327667240950336	160.85596225620577
-0.934812806628502	161.47772091390132
-0.9368604096622517	162.10120757973368
-0.9389095323103653	162.72642515104403
-0.9409601736882393	163.3533765267951
-0.9430123329125837	163.9820646075705
-0.9450660091014162	164.61249229557325
-0.9471212013740633	165.2446624946253
-0.9491779088511533	165.87857811016636
-0.9512361306546157	166.5142420492528
-0.9532958659076782	167.15165722055696
-0.9553571137348623	167.79082653436578
-0.9574198732619809	168.43175290258003
-0.9594841436161374	169.07443923871358
-0.9615499239257195	169.7188884578917
-0.9636172133203993	170.36510347685098
-0.9656860109311273	171.01308721393778
-0.9677563158901338	171.6628425891077
-0.9698281273309226	172.3143725239239
-0.9719014443882681	172.9676799415569
-0.9739762661982145	173.62276776678306
-0.9760525918980718	174.27963892598405
-0.9781304206264136	174.93829634714584
-0.9802097515230727	175.59874295985696
-0.9822905837291391	176.26098169530877
-0.9843729163869599	176.92501548629377
-0.9864567486401307	177.5908472672046
-0.9885420796334987	178.25847997403352
-0.9906289085131564	178.92791654437113
-0.9927172344264399	179.59915991740525
-0.9948070565219264	180.2722130339207
-0.9968983739494296	180.94707883629735
-0.9989911858600007	181.62376026851
-1.001085491405921	182.30226027612713
-1.0031812897407033	182.9825818063099
-1.005278580019087	183.66472780781115
-1.0073773613970352	184.34870123097488
-1.0094776330317328	185.03450502773472
-1.011579394081584	185.72214215161367
-1.0136826437062083	186.41161555772206
-1.0157873810664393	187.10292820275805
-1.0178936053243206	187.79608304500562
-1.0200013156431056	188.49108304433418
-1.0221105111872506	189.18793116219737
-1.0242211911224173	189.88663036163217
-1.0263333546154654	190.58718360725823
-1.028447000834453	191.28959386527646
-1.0305621289486333	191.99386410346878
-1.0326787381284503	192.69999729119627
-1.034796827545539	193.40799639939922
-1.0369163963727206	194.1178644005957
-1.0390374437840006	194.8296042688806
-1.0411599689545672	195.54321897992492
-1.0432839710607862	196.25871151097473
-1.0454094492802004	196.97608484085043
-1.0475364027915277	197.69534194994563
-1.049664830774655	198.416485820226
-1.0517947324106405	199.13951943522915
-1.053926106881707	199.86444578006308
-1.0560589533712417	200.59126784140517
-1.0581932710637927	201.31998860750204
-1.0603290591450667	202.05061106816783
-1.0624663168019266	202.78313821478355
-1.0646050432223888	203.51757304029664
-1.0667452375956201	204.25391853921914
-1.0688868991119362	204.99217770762766
-1.0710300269627997	205.73235354316216
-1.073174620340816	206.474449045025
-1.0753206784397304	207.21846721397998
-1.077468200454428	207.9644110523518
-1.07961718558093	208.71228356402463
-1.0817676330163912	209.4620877544417
-1.0839195419590966	210.21382663060447
-1.0860729116084609	210.96750320107088
-1.0882277411650239	211.72312047595554
-1.0903840298304495	212.48068146692833
-1.092541776807524	213.24018918721356
-1.0947009813001516	214.00164665158908
-1.0968616425133535	214.7650568763855
-1.0990237596532635	215.53042287948517
-1.1011873319271301	216.29774768032138
-1.1033523585433072	217.06703429987735
-1.105518838711258	217.83828576068552
-1.1076867716415497	218.61150508682707
-1.1098561565458527	219.38669530392986
-1.1120269926369342	220.163859439169
-1.1141992791286606	220.94300052126485
-1.1163730152359943	221.72412158048283
-1.118548200174989	222.5072256486322
-1.1207248331627873	223.29231575906516
-1.122902913417623	224.0793949466764
-1.1250824401588122	224.86846624790184
-1.127263412606756	225.65953270071793
-1.1294458299829373	226.45259734464082
-1.1316296915099155	227.24766322072526
-1.1338149964113275	228.04473337156404
-1.136001743911884	228.8438108412871
-1.1381899332373675	229.64489867556048
-1.1403795636146294	230.44799992158534
-1.1425706342715887	231.2531176280976
-1.1447631444372288	232.06025484536693
-1.146957093341597	232.86941462519556
-1.1491524802157989	233.6806000209178
-1.1513493042919989	234.49381408739904
-1.1535475648034188	235.30905988103484
-1.1557472609843316	236.12634045975028
-1.1579483920700622	236.9456588829987
-1.160150957296985	237.76701821176164
-1.162354955902521	238.59042150854702
-1.1645603871251367	239.41587183738923
-1.1667672502043391	240.2433722638475
-1.1689755443806775	241.07292585500576
-1.1711852688957372	241.90453567947108
-1.173396422992141	242.7382048073736
-1.1756090059135433	243.57393631036484
-1.1778230169046318	244.41173326161777
-1.180038455211122	245.25159873582527
-1.182255320079758	246.09353580919966
-1.184473610758307	246.93754755947177
-1.1866933264955597	247.78363706589033
-1.1889144665413278	248.63180740922056
-1.1911370301464401	249.48206167174385
-1.193361016562744	250.33440293725712
-1.1955864250430976	251.1888342910711
-1.1978132548413731	252.04535882001045
-1.200041505212453	252.90397961241268
-1.2022711754122266	253.76469975812688
-1.2045022646975883	254.62752234851357
-1.2067347723264368	255.49245047644334
-1.2089686975576726	256.3594872362964
-1.2112040396511943	257.2286357239616
-1.2134407978678983	258.0998990368353
-1.2156789714696756	258.9732802738215
-1.2179185597194109	259.8487825353297
-1.2201595618809804	260.72640892327547
-1.2224019772192471	261.6061625410787
-1.2246458050000626	262.48804649366286
-1.2268910444902623	263.3720638874547
-1.2291376949576653	264.25821783038333
-1.23138575567107	265.1465114318785
-1.2336352259002543	266.036947802871
-1.235886104915972	266.92953005579164
-1.2381383919899527	267.8242613045696
-1.2403920863948967	268.7211446646326
-1.242647187404476	269.62018325290575
-1.2449036942933311	270.5213801878106
-1.247161606337068	271.4247385892642
-1.2494209228122586	272.3302615786794
-1.2516816429964346	273.23795227896204
-1.2539437661680917	274.14781381451223
-1.2562072916066815	275.0598493112226
-1.2584722185926123	275.974061896477
-1.2607385464072483	276.89045469915095
-1.263006274332905	277.80903084960977
-1.2652754016528487	278.72979347970846
-1.2675459276512941	279.65274572279066
-1.2698178516134035	280.57789071368734
-1.2720911728252828	281.5052315887172
-1.2743658905739805	282.434771485685
-1.2766420041474869	283.366513543881
-1.278919512834731	284.3004609040801
-1.2811984159255776	285.2366167085413
-1.2834787127108283	286.17498410100666
-1.2857604024822158	287.1155662267008
-1.2880434845324056	288.0583662323295
-1.2903279581549911	289.0033872660798
-1.2926138226444943	289.9506324776186
-1.2949010772963623	290.9001050180923
-1.2971897214069645	291.8518080401256
-1.2994797542735943	292.805744697821
-1.3017711751944634	293.7619181467579
-1.3040639834687002	294.72033154399213
-1.3063581783963525	295.6809880480549
-1.308653759278379	296.6438908189517
-1.310950725416652	297.60904301816214
-1.3132490761139546	298.5764478086394
-1.315548810673978	299.5461083548084
-1.3178499284013199	300.5180278225659
-1.3201524286014836	301.4922093792796
-1.3224563105808753	302.46865619378724
-1.3247615736468017	303.4473714363958
-1.32706821710747	304.4283582788808
-1.3293762402719824	305.4116198944858
-1.3316856424503403	306.397159457921
-1.333996422953437	307.38498014536333
-1.3363085810930586	308.37508513445493
-1.338622116181881	309.36747760430296
-1.3409370275334684	310.36216073547837
-1.343253314462274	311.3591377100159
-1.3455709762836319	312.35841171141203
-1.3478900123137618	313.3599859246255
-1.350210421869765	314.36386353607617
-1.352532204269622	315.37004773364396
-1.3548553588321899	316.37854170666856
-1.3571798848772036	317.3893486459479
-1.3595057817252711	318.4024717437385
-1.3618330486978738	319.4179141937541
-1.364161685117363	320.43567919116526
-1.3664916903069584	321.4557699325975
-1.368823063590749	322.47818961613206
-1.3711558042936873	323.5029414413045
-1.3734899117415917	324.5300286091038
-1.3758253852611402	325.5594543219721
-1.3781622241798734	326.5912217838032
-1.3805004278261879	327.6253341999426
-1.3828399955293402	328.6617947771868
-1.385180926619439	329.70060672378116
-1.38752322042745	330.7417732494214
-1.3898668762851858	331.7852975652509
-1.3922118935253143	332.8311828838613
-1.3945582714813485	333.8794324192907
-1.3969060094876482	334.930049387024
-1.3992551068794192	335.9830370039914
-1.4016055629927113	337.03839848856813
-1.403957377164414	338.09613706057297
-1.4063105487322571	339.1562559412683
-1.4086650770348093	340.2187583533598
-1.4110209614114773	341.283647520994
-1.4133782012025	342.3509266697595
-1.4157367957489513	343.42059902668467
-1.4180967443927364	344.49266782023847
-1.4204580464765917	345.5671362803281
-1.422820701344078	346.64400763829946
-1.4251847083395877	347.72328512693576
-1.4275500668083347	348.8049719804578
-1.4299167760963605	349.88907143452167
-1.4322848355505222	350.9755867262196
-1.4346542445185038	352.0645210940781
-1.437025002348803	353.15587777805814
-1.439397108390737	354.2496600195535
-1.4417705619944379	355.3458710613913
-1.4441453625108505	356.44451414782935
-1.4465215092917332	357.54559252455806
-1.448899001689654	358.64910943869745
-1.451277839057991	359.75506813879747
-1.4536580207509284	360.86347187483756
-1.4560395461234572	361.97432389822484
-1.4584224145313718	363.0876274617945
-1.4608066253312704	364.20338581980883
-1.463192177880551	365.32160222795574
-1.4655790715374124	366.44227994334955
-1.467967305660849	367.56542222452885
-1.4703568796106559	368.6910323314569
-1.4727477927474184	369.81911352551947
-1.4751400444325178	370.9496690695261
-1.4775336340281264	372.082702227708
-1.4799285608972073	373.2182162657179
-1.4823248244035119	374.3562144506287
-1.4847224239115775	375.4967000509338
-1.4871213587867287	376.63967633654573
-1.4895216283950732	377.78514657879566
-1.491923232103502	378.9331140504327
-1.4943261692796872	380.0835820256229
-1.4967304392920784	381.2365537799493
-1.4991360415099075	382.3920325904102
-1.5015429753031773	383.55002173541976
-1.5039512400426702	384.7105244948062
-1.5063608350999391	385.87354414981104
-1.5087717598473107	387.03908398308965
-1.511184013657883	388.20714727870967
-1.51359759590552	389.3777373221504
-1.5160125059648546	390.55085740030194
-1.518428743211287	391.72651080146494
-1.5208463070209808	392.90470081535017
-1.5232651967708628	394.0854307330763
-1.525685411838622	395.2687038471715
-1.5281069516027066	396.45452345157076
-1.5305298154423237	397.6428928416165
-1.5329540027374384	398.8338153140574
-1.5353795128687713	400.0272941670476
-1.5378063452177964	401.223332700146
-1.5402344991667423	402.42193421431665
-1.5426639740985884	403.6231020119258
-1.5450947693970618	404.8268393967437
-1.5475268844466419	406.0331496739426
-1.5499603186325532	407.2420361500963
-1.5523950713407662	408.45350213317954
-1.5548311419579954	409.6675509325669
-1.5572685298716986	410.8841858590333
-1.5597072344700758	412.1034102247521
-1.5621472551420654	413.3252273432952
-1.5645885912773454	414.5496405296311
-1.56703124226633	415.77665310012657
-1.5694752075001706	417.0062683725441
-1.5719204863707528	418.23848966604163
-1.5743670782706936	419.47332030117195
-1.5768149825933442	420.7107635998825
-1.5792641987327842	421.9508228855141
-1.5817147260838227	423.1935014828008
-1.5841665640419955	424.43880271786793
-1.5866197120035652	425.6867299182339
-1.5890741693655195	426.9372864128072
-1.5915299355255679	428.1904755318871
-1.5939870098821436	429.44630060716173
-1.596445391834399	430.7047649717095
-1.5989050807822078	431.9658719599959
-1.6013660761261592	433.22962490787546
-1.6038283772675597	434.4960271525881
-1.6062919836084315	435.7650820327617
-1.6087568945515103	437.0367928884092
-1.6112231095002438	438.3111630609285
-1.6136906278587924	439.5881958931023
-1.6161594490320244	440.86789472909686
-1.6186295724255177	442.1502629144619
-1.6211009974455564	443.43530379612946
-1.6235737234991316	444.7230207224135
-1.6260477499939385	446.0134170430091
-1.6285230763383747	447.3064961089921
-1.630999701941541	448.602261272818
-1.6334776262132364	449.9007158883221
-1.6359568485639626	451.20186331071784
-1.638437368404916	452.50570689659685
-1.6409191851479916	453.8122500039282
-1.6434022982057788	455.1214959920583
-1.6458867069915604	456.4334482217081
-1.6483724109193132	457.74811005497554
-1.6508594094037055	459.06548485533256
-1.6533477018600946	460.3855759876256
-1.6558372877045269	461.70838681807453
-1.658328166353737	463.0339207142724
-1.6608203372251453	464.3621810451843
-1.663313799736858	465.6931711811472
-1.6658085533076632	467.0268944938685
-1.6683045973570334	468.36335435642667
-1.6708019313051214	469.7025541432697
-1.6733005545727595	471.04449723021474
-1.6758004665814594	472.3891869944473
-1.67830166675341	473.7366268145213
-1.6808041545114778	475.08682007035696
-1.6833079292792008	476.43977014324213
-1.6858129904807946	477.79548041583
-1.688319337541143	479.1539542721394
-1.6908269698858045	480.51519509755366
-1.6933358869410062	481.8792062788205
-1.6958460881336446	483.2459912040512
-1.698357572891282	484.61555326271963
-1.7008703406421493	485.9878958456623
-1.7033843908151391	487.3630223450769
-1.7058997228398114	488.74093615452273
-1.708416336146388	490.12164066891893
-1.7109342301657482	491.5051392845443
-1.7134534043294363	492.8914353990378
-1.7159738580696542	494.28053241139594
-1.7184955908192616	495.67243372197345
-1.7210186020117713	497.06714273248275
-1.7235428910813564	498.4646628459924
-1.7260684574628418	499.8649974669278
-1.7285953005917047	501.2681500010685
-1.7311234199040746	502.67412385555025
-1.7336528148367336	504.08292243886274
-1.7361834848271094	505.4945491608487
-1.7387154293132787	506.90900743270487
-1.7412486477339688	508.3263006669795
-1.7437831395285475	509.74643227757304
-1.746318904137033	511.16940567973745
-1.7488559410000817	512.5952242900751
-1.7513942495589945	514.0238915265375
-1.7539338292557134	515.4554108084268
-1.7564746795328205	516.8897855563932
-1.759016799833536	518.3270191924357
-1.7615601896017186	519.7671151399002
-1.764104848281863	521.2100768234801
-1.7666507753190979	522.6559076692149
-1.7691979701591902	524.1046111044899
-1.7717464322485355	525.5561905580354
-1.774296161034161	527.0106494599266
-1.7768471559637287	528.4679912415829
-1.779399416485528	529.9282193357661
-1.7819529420484754	531.3913371765817
-1.7845077321021172	532.8573481994771
-1.7870637860966245	534.3262558412413
-1.7896211034827916	535.7980635400044
-1.792179683712042	537.2727747352362
-1.794739526236416	538.7503928677475
-1.7973006305085792	540.2309213796871
-1.7998629959818178	541.7143637145432
-1.8024266221100353	543.2007233171421
-1.8049915083477548	544.6900036336468
-1.8075576541501184	546.1822081115578
-1.8101250589728795	547.6773401997115
-1.8126937222724127	549.1754033482803
-1.815263643505701	550.676401008771
-1.8178348221303433	552.1803366340258
-1.820407257604549	553.6872136782201
-1.8229809493871392	555.1970355968629
-1.825555896937544	556.7098058467959
-1.8281320997158008	558.2255278861928
-1.8307095571825556	559.7442051745592
-1.8332882687990633	561.2658411727315
-1.835868234027177	562.790439342876
-1.8384494523293606	564.3180031484893
-1.8410319231686774	565.8485360543973
-1.8436156460087942	567.3820415267548
-1.846200620313978	568.9185230330437
-1.8487868455490966	570.4579840420741
-1.8513743211796154	572.0004280239833
-1.853963046671598	573.5458584502339
-1.8565530214917036	575.094278793615
-1.8591442451071887	576.6456925282409
-1.861736716985904	578.2001031295501
-1.8643304365962936	579.7575140743056
-1.866925403407392	581.3179288405931
-1.8695216168888291	582.8813509078224
-1.8721190765108213	584.4477837567237
-1.8747177817441745	586.0172308693515
-1.877317732060286	587.5896957290788
-1.8799189269311374	589.165181820601
-1.8825213658292985	590.7436926299326
-1.8851250482279225	592.3252316444082
-1.8877299736007471	593.9098023526806
-1.890336141422094	595.4974082447218
-1.8929435511668653	597.0880528118201
-1.8955522023105476	598.6817395465823
-1.8981620943292024	600.2784719429316
-1.9007732266994737	601.8782534961066
-1.9033855988985826	603.4810877026614
-1.905999210404327	605.0869780604658
-1.908614060695082	606.6959280687031
-1.911230149249795	608.3079412278711
-1.9138474755479906	609.9230210397802
-1.9164660390697634	611.5411710075538
-1.9190858392957812	613.1623946356274
-1.9217068757072833	614.786695429747
-1.9243291477860789	616.4140768969718
-1.9269526550145428	618.0445425456692
-1.9295773968756231	619.6780958855175
-1.9322033728528316	621.3147404275036
-1.9348305824302467	622.9544796839244
-1.9374590250925123	624.5973171683838
-1.9400887003248342	626.2432563957938
-1.9427196076129842	627.8923008823734
-1.945351746443295	629.5444541456477
-1.947985116302658	631.1997197044483
-1.9506197166785286	632.8581010789119
-1.9532555470589192	634.5196017904804
-1.9558926069324005	636.1842253618994
-1.9585308957881007	637.8519753172186
-1.961170413115703	639.5228551817911
-1.963811158405449	641.1968684822723
-1.9664531311481306	642.8740187466193
-1.969096330835096	644.5543095040912
-1.9717407569582437	646.2377442852485
-1.9743864090100252	647.9243266219513
-1.9770332864834412	649.6140600473603
-1.979681388872045	651.3069480959347
-1.9823307156699324	653.0029943034333
-1.9849812663717536	654.702202206913
-1.9876330404727005	656.4045753447278
-1.9902860374685138	658.1101172565295
-1.9929402568554762	659.8188314832662
-1.9955956981304186	661.530721567182
-1.9982523607907094	663.245791051817
-2.0009102443342632	664.9640434820056
-2.0035693482595343	666.6854824038776
-2.006229672065517	668.410111364855
-2.008891215251745	670.1379339136557
-2.0115539773182887	671.8689536002877
-2.0142179577657595	673.6031739760526
-2.016883156095302	675.3405985935443
-2.019549571808598	677.0812310066469
-2.022217204407863	678.8250747705355
-2.024886053395846	680.5721334416753
-2.0275561182758315	682.3224105778211
-2.0302273985516326	684.0759097380171
-2.0328998937275946	685.8326344825956
-2.0355736033085927	687.5925883731765
-2.0382485268000305	689.3557749726676
-2.040924663707843	691.1221978452644
-2.0436020135384894	692.8918605564475
-2.0462805757989573	694.6647666729837
-2.0489603499967584	696.4409197629254
-2.0516413356399297	698.2203233956104
-2.054323532237033	700.0029811416583
-2.0570069392971484	701.7888965729757
-2.059691556329887	703.5780732627499
-2.062377382845373	705.3705147854522
-2.065064418354253	707.1662247168357
-2.0677526623676954	708.9652066339345
-2.0704421143973857	710.7674641150652
-2.0731327739555243	712.5730007398232
-2.0758246405548335	714.3818200890855
-2.0785177137085467	716.193925745007
-2.081211992930415	718.0093212910232
-2.0839074777347033	719.8280103118472
-2.0866041676361897	721.6499963934699
-2.089302062150164	723.4752831231601
-2.0920011607924303	725.3038740894632
-2.0947014630792977	727.1357728822012
-2.097402968527592	728.9709830924717
-2.100105676654642	730.809508312647
-2.1028095869782892	732.6513521363757
-2.1055146990168825	734.4965181585796
-2.1082210122892695	736.3450099754543
-2.1109285263148134	738.1968311844693
-2.1136372406133774	740.0519853843659
-2.1163471547053283	741.9104761751584
-2.119058268111537	743.772307158133
-2.1217705803533766	745.6374819358455
-2.124484090952721	747.5060041121242
-2.127198799431946	749.3778772920663
-2.1299147053139245	751.2531050820388
-2.1326318081220306	753.1316910896791
-2.135350107380136	755.0136389238917
-2.138069602612609	756.8989521948494
-2.140790293344316	758.7876345139933
-2.1435121791006146	760.6796894940312
-2.1462352594073626	762.575120748937
-2.1489595337909067	764.4739318939507
-2.151685001778093	766.3761265455793
-2.1544116628962517	768.2817083215925
-2.1571395166732117	770.1906808410264
-2.1598685626372887	772.1030477241801
-2.1625988003172902	774.0188125926169
-2.165330229242511	775.9379790691625
-2.1680628489427343	777.8605507779049
-2.1707966589482304	779.7865313441944
-2.173531658789759	781.7159243946434
-2.176267847998563	783.6487335571239
-2.179005226106371	785.5849624607697
-2.1817437926453938	787.5246147359742
-2.184483547148331	789.4676940143895
-2.187224489148358	791.4142039289275
-2.1899666181791364	793.3641481137576
-2.192709933774808	795.3175302043085
-2.195454435469994	797.2743538372652
-2.1982001227997974	799.2346226505704
-2.200946995299794	801.1983402834222
-2.2036950525060464	803.1655103762761
-2.206444293955084	805.1361365708418
-2.209194719183922	807.1102225100844
-2.211946327730046	809.0877718382243
-2.214699119131415	811.0687882007335
-2.217453092926466	813.05327524434
-2.220208248654107	815.0412366170233
-2.222964585853719	817.0326759680158
-2.225722104065154	819.027596947802
-2.228480802828735	821.0260032081175
-2.2312406816852555	823.0278984019488
-2.2340017401759793	825.0332861835336
-2.236763977842635	827.0421702083585
-2.239527394227424	829.0545541331609
-2.2422919888730104	831.0704416159257
-2.2450577613225278	833.0898363158874
-2.2478247111195735	835.1127418935284
-2.25059283780821	837.1391620105778
-2.253362140932965	839.1691003300133
-2.2561326200388256	841.2025605160578
-2.2589042746712464	843.2395462341798
-2.261677104376141	845.2800611510949
-2.2644511086998844	847.3241089347629
-2.2672262871893114	849.3716932543883
-2.2700026393917163	851.4228177804201
-2.2727801648548533	853.4774861845502
-2.2755588631269346	855.5357021397137
-2.278338733756628	857.5974693200893
-2.28111977629306	859.6627914010968
-2.2839019902858104	861.731672059398
-2.2866853752849163	863.8041149728951
-2.289469930840867	865.8801238207332
-2.2922556565046084	867.9597022832952
-2.2950425518275366	870.0428540422051
-2.297830616361501	872.1295827803261
-2.300619849658801	874.2198921817594
-2.303410251272191	876.3137859318456
-2.306201820754869	878.4112677171612
-2.308994557660486	880.5123412255222
-2.3117884615431423	882.6170101459804
-2.314583531957384	884.7252781688238
-2.3173797684582045	886.837148985577
-2.320177170601045	888.9526262889993
-2.3229757379417904	891.071713773085
-2.325775470036772	893.1944151330637
-2.3285763664427637	895.3207340653977
-2.3313784267169853	897.4506742677836
-2.334181650417098	899.5842394391507
-2.3369860371012057	901.7214332796611
-2.339791586327851	903.8622594907091
-2.342598297656022	906.0067217749202
-2.3454061706451417	908.154823836151
-2.3482152048550775	910.3065693794897
-2.3510253998461317	912.461962111253
-2.353836755179045	914.6210057389882
-2.356649270414995	916.7837039714723
-2.359462945115597	918.9500605187105
-2.3622777788429037	921.1200790919363
-2.3650937711593985	923.2937634036113
-2.367910921628003	925.4711171674239
-2.3707292298120715	927.6521440982899
-2.37354869527539	929.8368479123519
-2.376369317582177	932.0252323269771
-2.379191096297086	934.2173010607592
-2.382014030985195	936.4130578335167
-2.384838121212021	938.6125063662925
-2.3876633665435016	940.8156503813536
-2.390489766546011	943.0224936021912
-2.393317320786346	945.2330397535181
-2.3961460288317364	947.4472925612723
-2.3989758902498313	949.665255752611
-2.401806904608713	951.8869330559148
-2.404639071476888	954.1123282007861
-2.4074723904232838	956.3414449180475
-2.4103068610172564	958.5742869397409
-2.4131424828285852	960.8108579991299
-2.4159792554274695	963.0511618306963
-2.4188171783845323	965.2952021701418
-2.4216562512708193	967.5429827543853
-2.4244964736577956	969.7945073215647
-2.4273378451173486	972.0497796110353
-2.4301803652217826	974.3088033633697
-2.4330240335438207	976.5715823203567
-2.4358688496566074	978.8381202250018
-2.438714813133703	981.1084208215261
-2.441561923549084	983.3824878553656
-2.4444101804771465	985.6603250731721
-2.4472595834926962	987.94193622281
-2.4501101321709595	990.2273250533591
-2.4529618260875745	992.5164953151127
-2.4558146648185937	994.8094507595767
-2.458668647940483	997.1061951394694
-2.46152377503012	999.4067322087212
-2.464380045664793	1001.7110657224738
-2.4672374594222055	1004.019199437082
-2.4700960158804666	1006.3311371101078
-2.472955714618099	1008.6468825003282
-2.4758165552140325	1010.9664393677245
-2.478678537247607	1013.2898114734928
-2.4815416602985674	1015.6170025800345
-2.4844059239470693	1017.9480164509598
-2.4872713277736747	1020.28285685109
-2.4901378713593494	1022.6215275464484
-2.4930055542854666	1024.9640323042718
-2.495874376133802	1027.3103748929987
-2.4987443364865407	1029.660559082277
-2.5016154349262645	1032.0145886429573
-2.504487671035963	1034.3724673470988
-2.507361044399026	1036.7341989679649
-2.5102355545992454	1039.0997872800192
-2.5131112012208163	1041.4692360589363
-2.515987983848328	1043.8425490815885
-2.5188659020667794	1046.2197301260546
-2.521744955461559	1048.6007829716139
-2.5246251436184597	1050.9857113987505
-2.5275064661236706	1053.3745191891476
-2.530388922563778	1055.7672101256894
-2.5332725125257656	1058.163787992465
-2.5361572355970123	1060.564256574759
-2.5390430913652953	1062.9686196590596
-2.541930079418782	1065.3768810330525
-2.5448181993460386	1067.789044485624
-2.5477074507360213	1070.2051138068568
-2.5505978331780845	1072.6250927880353
-2.5534893462619714	1075.0489852216383
-2.5563819895778135	1077.4767949013426
-2.5592757627161435	1079.9085256220249
-2.5621706652678755	1082.344181179753
-2.56506669682432	1084.7837653717963
-2.567963856977171	1087.2272819966156
-2.5708621453185208	1089.67473485387
-2.5737615614408376	1092.1261277444105
-2.576662104936989	1094.5814644702846
-2.5795637754002216	1097.0407488347319
-2.5824665724241735	1099.5039846421867
-2.5853704956028665	1101.9711756982756
-2.5882755445307075	1104.442325809817
-2.591181718802492	1106.917438784824
-2.594089018013393	1109.3965184324982
-2.596997441758973	1111.8795685632351
-2.599906989635176	1114.3665929886188
-2.602817661238326	1116.857595521424
-2.6057294561651334	1119.3525799756178
-2.6086423740126836	1121.8515501663535
-2.6115564143784518	1124.3545099099754
-2.614471576860285	1126.861463024016
-2.617387861056413	1129.3724133271967
-2.6203052665654463	1131.8873646394243
-2.6232237929863707	1134.4063207817962
-2.6261434399185535	1136.9292855765948
-2.6290642069617327	1139.4562628472875
-2.631986093716032	1141.9872564185318
-2.634909099781945	1144.5222701161665
-2.637833224760343	1147.0613077672192
-2.6407584682524714	1149.6043731998996
-2.643684829859952	1152.1514702436036
-2.646612309184778	1154.7026027289087
-2.6495409058293196	1157.2577744875794
-2.6524706193963152	1159.8169893525599
-2.655401449488877	1162.3802511579781
-2.6583333957104913	1164.947563739145
-2.661266457665014	1167.518930932552
-2.6642006349566705	1170.0943565758732
-2.667135927190056	1172.6738445079627
-2.670072333970139	1175.257398568856
-2.6730098549022516	1177.8450225997672
-2.6759484895920975	1180.4367204430898
-2.6788882376457477	1183.032495942401
-2.6818290986696396	1185.6323529424499
-2.684771072270579	1188.23629528917
-2.6877141580557344	1190.8443268296685
-2.690658355632646	1193.4564514122337
-2.6936036646092116	1196.0726728863276
-2.6965500845937	1198.6929951025918
-2.6994976151947405	1201.3174219128427
-2.7024462560213243	1203.9459571700716
-2.705396006682811	1206.5786047284487
-2.7083468667889172	1209.2153684433144
-2.711298835949724	1211.8562521711892
-2.714251913775672	1214.5012597697623
-2.717206099877566	1217.1503950979009
-2.7201613938665665	1219.8036620156429
-2.723117795354198	1222.4610643842018
-2.7260753039523404	1225.1226060659606
-2.729033919273234	1227.788290924475
-2.7319936409294776	1230.4581228244747
-2.734954468534026	1233.132105631859
-2.737916401700193	1235.8102432136982
-2.7408794400416467	1238.4925394382324
-2.743843583172415	1241.1789981748739
-2.746808830706875	1243.8696232942018
-2.749775182259763	1246.5644186679656
-2.7527426374461705	1249.263388169085
-2.7557111958815397	1251.966535671645
-2.758680857181669	1254.673865050903
-2.7616516209627067	1257.3853801832784
-2.7646234868411574	1260.1010849463632
-2.767596454433873	1262.8209832189125
-2.7705705233580593	1265.5450788808494
-2.773545693231274	1268.2733758132626
-2.7765219636714193	1271.005877898404
-2.7794993342967556	1273.7425890196955
-2.782477804725886	1276.483513061719
-2.785457374577765	1279.2286539102242
-2.788438043471693	1281.9780154521209
-2.791419811027323	1284.7316015754873
-2.794402676864649	1287.48941616956
-2.797386640604015	1290.2514631247398
-2.800371701866112	1293.0177463325915
-2.8033578602719746	1295.7882696858383
-2.806345115442984	1298.56303707837
-2.809333467000863	1301.3420524052308
-2.8123229145676834	1304.1253195626314
-2.815313457765856	1306.912842447939
-2.81830509621814	1309.7046249596835
-2.8212978295476305	1312.5006709975519
-2.8242916573777705	1315.300984462389
-2.827286579332342	1318.1055692562036
-2.830282595035466	1320.9144292821557
-2.833279704111612	1323.7275684445694
-2.836277906185578	1326.544990648922
-2.839277200882514	1329.3666998018507
-2.8422775878278976	1332.192699811145
-2.845279066647555	1335.022994585757
-2.848281636967644	1337.8575880357894
-2.8512852984146617	1340.6964840725002
-2.8542900506154445	1343.539686608307
-2.8572958931971626	1346.3871995567767
-2.860302825787324	1349.2390268326349
-2.863310848013773	1352.095172351756
-2.866319959504688	1354.9556400311747
-2.869330159888582	1357.8204337890716
-2.872341448794303	1360.6895575447825
-2.8753538258510325	1363.5630152187987
-2.878367290688285	1366.4408107327579
-2.8813818429359084	1369.3229480094537
-2.884397482224082	1372.2094309728263
-2.8874142081833205	1375.1002635479726
-2.890432020444464	1377.9954496611324
-2.8934509186386874	1380.894993239702
-2.8964709023974975	1383.7988982122226
-2.899491971352726	1386.7071685083858
-2.9025141251365394	1389.6198080590334
-2.905537363381427	1392.5368207961528
-2.908561685720216	1395.4582106528815
-2.911587091786052	1398.3839815635022
-2.914613581212415	1401.314137463448
-2.917641153633107	1404.248682289295
-2.920669808682261	1407.187619978768
-2.9236995459943333	1410.1309544707376
-2.926730365204108	1413.0786897052174
-2.9297622659466924	1416.0308296233702
-2.9327952478575203	1418.987378167499
-2.935829310572349	1421.948339281056
-2.93886445372726	1424.9137169086316
-2.9419006769586584	1427.8835149959664
-2.944937979903271	1430.8577374899387
-2.947976362198148	1433.8363883385719
-2.9510158234806645	1436.8194714910314
-2.9540563633885095	1439.8069908976242
-2.9570979815597034	1442.798950509801
-2.960140677632577	1445.7953542801497
-2.963184451245789	1448.7962061624044
-2.9662293020383133	1451.8015101114331
-2.9692752296494462	1454.8112700832505
-2.9723222337188013	1457.8254900350078
-2.975370313886309	1460.8441739249924
-2.978419469792222	1463.8673257126377
-2.9814697010771045	1466.8949493585092
-2.984521007381844	1469.927048824315
-2.987573388347639	1472.9636280728964
-2.9906268436160106	1476.004691068238
-2.993681372828788	1479.0502417754553
-2.9967369756281212	1482.1002841608056
-2.999793651656474	1485.1548221916785
-3.0028514005566205	1488.2138598366002
-3.005910221971655	1491.2774010652356
-3.0089701155449813	1494.3454498483802
-3.012031080920319	1497.4180101579677
-3.015093117741694	1500.4950859670619
-3.0181562256534527	1503.5766812498666
-3.021220404300248	1506.6627999817144
-3.0242856533270457	1509.7534461390717
-3.027351972379122	1512.848623699539
-3.030419361102062	1515.9483366418485
-3.033487819141766	1519.0525889458663
-3.0365573461444364	1522.1613845925856
-3.039627941756592	1525.274727564136
-3.042699605625053	1528.3926218437748
-3.045772337396953	1531.5150714158913
-3.048846136719735	1534.642080266004
-3.0519210032411404	1537.773652380761
-3.054996936609229	1540.909791747942
-3.058073936472357	1544.0505023564513
-3.061152002479194	1547.1957881963285
-3.0642311342787116	1550.3456532587336
-3.0673113315201883	1553.5001015359617
-3.070392593853204	1556.6591370214294
-3.073474920927649	1559.8227637096863
-3.0765583123937117	1562.9909855964038
-3.079642767901886	1566.1638066783805
-3.08272828710297	1569.341230953545
-3.0858148696480643	1572.523262420946
-3.08890251518857	1575.7099050807612
-3.091991223376192	1578.9011629342913
-3.095080993862936	1582.0970399839648
-3.0981718263011078	1585.2975402333295
-3.1012637203433133	1588.502667687059
-3.1043566756424616	1591.712426350953
-3.107450691851759	1594.9268202319288
-3.110545768624711	1598.145853338033
-3.113641905615123	1601.369529678428
-3.116739102477101	1604.5978532634037
-3.1198373588650425	1607.8308281043658
-3.12293667443365	1611.0684582138467
-3.12603704883792	1614.310747605498
-3.1291384817331434	1617.5577002940875
-3.1322409727749125	1620.8093202955108
-3.1353445216191127	1624.065611626775
-3.1384491279219255	1627.3265783060142
-3.1415547913398263	1630.592224352475
-3.1446615115295886	1633.8625537865278
-3.147769288148277	1637.137570629656
-3.1508781208532524	1640.4172789044671
-3.153988009302168	1643.7016826346812
-3.157098953152969	1646.990785845136
-3.160210952063897	1650.2845925617887
-3.1633240056934824	1653.5831068117106
-3.16643811370055	1656.8863326230905
-3.1695532757442133	1660.1942740252307
-3.1726694914838807	1663.5069350485526
-3.175786760579249	1666.8243197245881
-3.178905082690305	1670.1464320859866
-3.1820244574773273	1673.4732761665118
-3.1851448846008816	1676.8048560010377
-3.1882663637218265	1680.1411756255588
-3.1913888945013045	1683.4822390771744
-3.194512476600752	1686.8280503941041
-3.1976371096818896	1690.1786136156734
-3.2007627934067244	1693.5339327823256
-3.203889527437555	1696.8940119356112
-3.2070173114369624	1700.2588551181939
-3.2101461450678186	1703.6284663738497
-3.2132760279932775	1707.0028497474625
-3.2164069598767804	1710.3820092850294
-3.2195389403820545	1713.765949033654
-3.2226719691731103	1717.154673041553
-3.2258060459142435	1720.5481853580486
-3.2289411702700366	1723.9464900335756
-3.2320773419053497	1727.3495911196749
-3.23521456048533	1730.757492668994
-3.2383528256754084	1734.1701987352938
-3.2414921371412984	1737.587713373436
-3.2446324945489926	1741.0100406393942
-3.2477738975647674	1744.4371845902447
-3.2509163458551824	1747.869149284174
-3.2540598390870747	1751.305938780473
-3.257204376927562	1754.7475571395357
-3.2603499590440475	1758.1940084228654
-3.263496585104208	1761.6452966930672
-3.2666442547760033	1765.1014260138545
-3.2697929677276716	1768.5624004500391
-3.2729427236277315	1772.0282240675429
-3.2760935221449734	1775.4989009333854
-3.2792453629484757	1778.9744351156953
-3.2823982457075864	1782.4548306836994
-3.285552170091933	1785.940091707727
-3.2887071357714226	1789.4302222592135
-3.291863142416234	1792.925226410691
-3.2950201896968276	1796.4251082357978
-3.2981782772839345	1799.929871809268
-3.3013374048485633	1803.4395212069426
-3.3044975720619987	1806.9540605057557
-3.307658778595799	1810.473493783748
-3.3108210241217964	1813.9978251200555
-3.3139843083120963	1817.5270585949143
-3.3171486308390796	1821.0611982896614
-3.320313991375399	1824.600248286729
-3.323480389593983	1828.1442126696525
-3.3266478251680245	1831.693095523058
-3.3298162977709995	1835.2469009326767
-3.3329858070766485	1838.8056329853318
-3.3361563527589824	1842.3692957689439
-3.339327934492288	1845.9378933725338
-3.3425005519511197	1849.5114298862125
-3.3456742048103036	1853.0899094011932
-3.348848892744934	1856.673336009778
-3.352024615430377	1860.2617138053708
-3.3552013725422642	1863.8550468824628
-3.3583791637565	1867.4533393366473
-3.361557988749257	1871.0565952646066
-3.3647378471969698	1874.6648187641158
-3.3679187387763503	1878.2780139340487
-3.3711006631643685	1881.8961848743656
-3.3742836200382715	1885.5193356861264
-3.3774676090755626	1889.1474704714767
-3.380652629954018	1892.7805933336585
-3.3838386823516777	1896.4187083770037
-3.387025765946849	1900.0618197069355
-3.3902138804181012	1903.7099314299683
-3.3934030254442713	1907.363047653706
-3.396593200704461	1911.0211724868466
-3.399784405878033	1914.684310039171
-3.4029766406446185	1918.3524644215581
-3.406169904684108	1922.0256397459677
-3.409364197676659	1925.7038401254563
-3.412559519302688	1929.3870696741633
-3.4157558692428753	1933.0753325073165
-3.4189532471781656	1936.7686327412362
-3.422151652789763	1940.4669744933253
-3.425351085759133	1944.170361882077
-3.4285515457680025	1947.8787990270687
-3.4317530324983596	1951.5922900489675
-3.4349555456324534	1955.310839069522
-3.4381590848527916	1959.0344502115731
-3.441363649842143	1962.7631275990418
-3.444569240283532	1966.4968753569337
-3.447775855860248	1970.235697611346
-3.450983496255835	1973.9795984894517
-3.454192161154098	1977.7285821195155
-3.457401850239096	1981.4826526308793
-3.4606125631951503	1985.2418141539747
-3.4638242997068356	1989.0060708203096
-3.467037059458986	1992.7754267624819
-3.470250842136692	1996.5498861141675
-3.473465647425298	2000.3294530101227
-3.4766814750104102	2004.1141315861923
-3.4798983245778814	2007.9039259792944
-3.4831161958138304	2011.6988403274358
-3.486335088404621	2015.498878769698
-3.4895550020368797	2019.3040454462466
-3.4927759363974817	2023.1143444983263
-3.495997891173557	2026.9297800682589
-3.4992208660524944	2030.7503562994518
-3.502444860721928	2034.5760773363847
-3.5056698748697515	2038.406947324621
-3.5088959081841073	2042.242970410799
-3.5121229603533948	2046.0841507426383
-3.515351031066257	2049.9304924689327
-3.518580120011597	2053.781999739559
-3.521810226878567	2057.638676705465
-3.525041351356565	2061.5005275186754
-3.528273493135249	2065.3675563323
-3.5315066519045173	2069.2397673005116
-3.534740827354527	2073.1171645785707
-3.537976019175679	2076.9997523228044
-3.5412122270586264	2080.8875346906216
-3.54444945069427	2084.780515840501
-3.5476876897737633	2088.6786999319993
-3.5509269439885003	2092.582091125745
-3.55416721303013	2096.49069358344
-3.5574084965905466	2100.404511467863
-3.5606507943618912	2104.323548942861
-3.563894106036556	2108.2478101733595
-3.5671384313071726	2112.177299325351
-3.5703837698666256	2116.1120205659054
-3.5736301214080455	2120.051978063159
-3.576877485624803	2123.997175986322
-3.5801258622105205	2127.947618505678
-3.583375250859063	2131.9033097925767
-3.5866256512645416	2135.864254019445
-3.5898770631213073	2139.830455359772
-3.5931294861239635	2143.801917988123
-3.596382919967351	2147.7786460801285
-3.599637364346557	2151.7606438124935
-3.6028928189569123	2155.747915362987
-3.6061492834939886	2159.7404649104456
-3.609406757653603	2163.738296634781
-3.6126652411318116	2167.7414147169648
-3.615924733624917	2171.7498233390434
-3.61918523482946	2175.7635266841226
-3.622446744442225	2179.7825289363836
-3.625709262160236	2183.8068342810675
-3.6289727876807585	2187.836446904487
-3.6322373207013	2191.871370994016
-3.635502860919605	2195.911610738095
-3.6387694080336606	2199.957170326234
-3.642036961741694	2204.0080539490023
-3.6453055217421686	2208.0642657980384
-3.6485750877337897	2212.1258100660416
-3.6518456594155007	2216.192690946779
-3.655117236486481	2220.264912635078
-3.658389818646151	2224.3424793268296
-3.661663405594169	2228.425395218992
-3.664937997030429	2232.513664509581
-3.668213592655063	2236.6072913976773
-3.6714901921684415	2240.7062800834233
-3.6747677952711673	2244.810634768025
-3.6780464016640835	2248.9203596537445
-3.6813260110482684	2253.035458943914
-3.6846066231250347	2257.1559368429175
[truncated: 8,000 more rows]
