# Supplementary material for: Critical Phenomena of Charged AdS Black Holes in Rastall Gravity
Source: Hindawi journal article supplement (doi:10.1155/2020/4065254), 2020-01-24
Supplement: f1 [file 4065254.f1.zip › Fig5(b)-GT2.dat]

-3175.139171744363	3.0024998007622914
-2384.2728421359134	2.730022463234989
-1835.4373286836105	2.5029996586179357
-1442.7149631887444	2.310941875361058
-1154.3346604776584	2.146356604920386
-937.8323696324748	2.0037493407586218
-772.1471016560372	1.8789992027203841
-643.2088507411171	1.7689549292749274
-541.3744585252081	1.6711655390112017
-459.8843458730876	1.5836960463975704
-393.9047078821397	1.5049984628135495
-339.9167004634572	1.4338196544295765
-295.31736860851385	1.3691343297558851
-258.153193539211	1.3100955087003352
-226.9386691640506	1.255997374361748
-200.53056078437544	1.20624704039281
-178.03933501662763	1.1603428335868975
-158.76584239936142	1.1178574025566916
-142.15543335283434	1.0784244459816401
-127.76428837291365	1.0417281867352348
-115.234423203722	1.0074949511868132
-104.27493348273848	0.9754863783159015
-94.6477799787544	0.9454939021176011
-86.15691432856339	0.9173342372069804
-78.63988749679768	0.8908456610815059
-71.96132108803	0.8658849337098973
-66.00778893267189	0.8423247305228329
-60.68377530836308	0.8200514916754202
-55.908461599888255	0.7989636108997935
-51.613155177450075	0.778969902995765
-47.73921964314777	0.75998830119787
-44.236399097109654	0.7419447451716168
-41.06145401577594	0.7247722278674079
-38.177045047201226	0.7084099753715833
-35.55081517102474	0.6928027385959482
-33.1546314347228	0.6779001794086945
-30.963955724708963	0.6636563368351953
-28.95732038942891	0.6500291614033719
-27.115889463846212	0.6369801076958866
-25.423090092657485	0.6244737767938998
-23.8643017681326	0.6124776016275689
-22.42659337889896	0.6009615693441339
-21.09849995265544	0.5898979757104493
-19.869832478359974	0.5792612073189995
-18.73151539563696	0.5690275479932424
-17.675447305318503	0.5591750063123655
-16.694381234831024	0.5496831616155303
-15.78182142410353	0.5405330262161936
-14.931934111859194	0.531706921870114
-14.1394702221021	0.5231883688059344
-13.399698194855995	0.514961985852701
-12.70834548839825	0.5070134003909039
-12.061547513985815	0.4993291670179294
-11.455802957656088	0.4918966939596589
-10.887934604516976	0.48470417638097646
-10.355054914971536	0.4777405358522277
-9.854535714351025	0.4709953653187271
-9.383981451338908	0.4644588789983647
-8.94120555950691	0.4581218667000123
-8.524209522819312	0.4519756521142393
-8.131164302188413	0.4460120546791083
-7.760393827801095	0.440223354668578
-7.410360302394825	0.4346022611902039
-7.079651095105651	0.42914188281316373
-6.766967034902731	0.4238357005777921
-6.47111193776156	0.41867754316435163
-6.190983223273971	0.4136615640221625
-5.925563494900181	0.4087822202808755
-5.673912973997789	0.4040342532839555
-5.435162691501699	0.3994126706006306
-5.208508353001698	0.3949127293869464
-4.993204803244166	0.3905299209793312
-4.788561025001424	0.38625995661546214
-4.593935615001287	0.382098754187355
-4.408732686355115	0.3780424259406624
-4.232398152805597	0.37408726704225387
-4.064416355254076	0.3702297449454078
-3.904306995523394	0.3664664894884348
-3.7516223462524665	0.36279428366839667
-3.6059447092772157	0.35921005503681863
-3.466884097892636	0.35571086766902094
-3.3340761210674037	0.35229391466294424
-3.207180050042111	0.34895651112718046
-3.0858770498258106	0.3456960876213884
-2.9698685599476518	0.34251018401540567
-2.858874810451324	0.3393964437362043
-2.7526334605659315	0.3363526083744121
-2.650898348770394	0.3333765126244497
-2.5534383441092685	0.3304660795344548
-2.4600362896331127	0.32761931604408817
-2.3704880297411237	0.32483430879007236
-2.2846015140106704	0.3221092201609037
-2.2021959708191634	0.3194422845836407
-2.123101144708056	0.31683180502699476
-2.0471565920156927	0.314276149706165
-1.9742110298226505	0.31177374897596855
-1.9041217337170186	0.3093230923998291
-1.8367539803035378	0.3069227259831222
-1.7719805307549614	0.3045712495602223
-1.7096811520409507	0.3022673143253814
-1.6497421727733497	0.30000962049828717
-1.5920560708803793	0.29779691511580547
-1.5365210905693072	0.2956279899420232
-1.4830408862603346	0.29350167948926065
-1.431524191376216	0.29141685914324134
-1.381884510054793	0.28937244338607804
-1.3340398300170526	0.2873673841111733
-1.2879123549733684	0.2854006690245347
-1.2434282550866718	0.28347132012737897
-1.2005174341349698	0.281578392275242
-1.159113312128003	0.2797209718091343
-1.1191526222350738	0.2778981752545718
-1.0805752209741655	0.2761091480845883
-1.0433239106972878	0.27435306354308897
-1.007344273484333	0.272629121525137
-0.9725845156283102	0.2709365475109874
-0.9389953219592839	0.269274591550879
-0.9065297193132653	0.2676425272977907
-0.875142948506178	0.26603965108553485
-0.8447923442223579	0.2644652810497314
-0.8154372222721941	0.26291875628935074
-0.7870387737149441	0.2613994360666599
-0.7595599653807089	0.2599066990435337
-0.73296544636042	0.258439942552218
-0.7072214600646877	0.25699858189874547
-0.6822957614817781	0.25558204969730913
-0.6581575392920352	0.25418979523400287
-0.6347773425209524	0.25282128385842617
-0.6121270114360124	0.2514759964017407
-0.5901796124135299	0.2501534286198462
-0.5689093765211996	0.2488530906604208
-0.548291641579985	0.2475745065526393
-0.5283027974855824	0.24631721371845267
-0.5089202345849669	0.24508076250437316
-0.4901222949176853	0.24386471573276802
-0.4718882261446206	0.24266864827172013
-0.454198137999054	0.2414921466225651
-0.43703296110602785	0.24033480852426373
-0.42037440802639164	0.2391962425738129
-0.4042049363914999	0.23807606786194166
-0.38850771400344375	0.23697391362337958
-0.37326658578394534	0.23588941890102094
-0.35846604246270913	0.23482223222334583
-0.3440911909031333	0.23377201129449093
-0.3301277259698943	0.2327384226963954
-0.31656190384905436	0.2317211416024761
-0.3033805167370516	0.2307198515023153
-0.2905708688202435	0.22973424393686992
-0.2781207534716146	0.2287640182437352
-0.2660184315958602	0.22780888131202148
-0.2542526110583486	0.22686854734642278
-0.24281242713745463	0.22594273764007727
-0.23168742394348207	0.2250311803558406
-0.22086753675086956	0.2241336103156102
-0.21034307519361378	0.2232497687973567
-0.20010470727687024	0.2223794033395364
-0.19014344416051984	0.22152226755257254
-0.18045062567313103	0.22067812093710956
-0.17101790651721271	0.21984672870875846
-0.16183724312896644	0.21902786162906362
-0.1529008811579019	0.21822129584243527
-0.14420134353370437	0.21742681271880426
-0.13573141908963066	0.21664419870176427
-0.1274841517134896	0.21587324516198142
-0.11945282999891454	0.21511374825565846
-0.11163097737120087	0.2143655087878511
-0.10401234266343465	0.21362833208044418
-0.09659089112001068	0.21290202784460294
-0.08936079580592306	0.21218641005752353
-0.08231642940141434	0.21148129684331465
-0.07545235636270808	0.2107865103578498
-0.06876332543060412	0.21010187667743607
-0.06224426246972577	0.20942722569115338
-0.055890263622139766	0.20876239099672336
-0.049696588759957916	0.2081072097997736
-0.04365865522235893	0.20746152281636884
-0.03777203182325226	0.20682517417868632
-0.03203243311653958	0.20619801134371737
-0.0264357139066276	0.20557988500488256
-0.020977863992492345	0.20497064900645273
-0.015655003134216534	0.20437016026067234
-0.010463376231497259	0.20377827866748616
-0.005399348704170807	0.2031948670367743
-0.00045940206531488656	0.20261979101300465
0.0043598703220235485	0.20205291900221578
0.009061767312968805	0.20149412210124618
0.013649483881884267	0.20094327402912973
0.01812611486401921	0.20040025106058076
0.022494658544998887	0.19986493196149477
0.0267580201050567	0.19933719792639307
0.03091901492456299	0.1988169325177447
0.03498037175707839	0.198304021607099
0.03894473577585151	0.19779835331796702
0.04281467149938795	0.1972998179703906
0.046592665601443574	0.19680830802714214
0.050281129610531036	0.1963237180414985
0.05388240250378451	0.19584594460653626
0.05739875319978996	0.1953748863058963
0.060832382954769434	0.19491044366596896
0.06418542766629533	0.1944525191094509
0.06745996008851414	0.1940010169102302
0.07065799196266684	0.1935558431495525
0.07378147606651805	0.19311690567342954
0.07683230818613346	0.1926841140512455
0.07981232901328522	0.19225737953552538
0.08272332597161183	0.1918366150228249
0.0855670349745151	0.19142173501570742
0.08834514211763711	0.19101265558577166
0.09105928530863139	0.19060929433769705
0.09371105583681755	0.19021157037427444
0.09630199988519055	0.18981940426238955
0.09883361998714334	0.1894327179999306
0.10130737643015698	0.18905143498359034
0.10372468860860885	0.18867547997753337
0.10608693632775426	0.18830477908290374
0.10839546106084552	0.18793925970814493
0.11065156716126517	0.18757885054010792
0.1128565230314665	0.18722348151592286
0.11501156225043692	0.18687308379561085
0.11711788466132371	0.18652758973541306
0.11917665742079012	0.186186932861816
0.12118901601160251	0.18585104784625076
0.12315606521988355	0.1855198704804471
0.1250788800784052	0.18519333765242166
0.126958506777236	0.184871387323082
0.1287959635430013	0.18455395850342804
0.1305922414879614	0.1842409912323326
0.1323483054300617	0.18393242655488498
0.13406509468506045	0.18362820650127978
0.13574352383179217	0.18332827406623642
0.13738448345158252	0.18303257318893215
0.13898884084278668	0.18274104873343555
0.14055744071138254	0.18245364646962436
0.1420911058385133	0.18217031305457468
0.14359063772583605	0.18189099601440784
0.14505681721949715	0.18161564372658162
0.14649040511352396	0.18134420540261342
0.14789214273338772	0.18107663107122282
0.14926275250046378	0.18081287156188228
0.15060293847808542	0.1805528784887639
0.15191338689985878	0.1802966042350715
0.15319476668088153	0.18004400193774692
0.15444772991247985	0.1797950254725408
0.1556729123410564	0.1795496294394372
0.1568709338316166	0.1793077691484221
0.15804239881651894	0.17906940060558732
0.15918789672997385	0.17883448049955963
0.16030800242879506	0.1786029661882466
0.16140327659988613	0.1783748156858911
0.1624742661549297	0.17814998765042514
0.1635215046127251	0.17792844137111558
0.16454551246960492	0.17771013675649408
0.1655467975583442	0.17749503432256306
0.16652585539595982	0.1772830951812708
0.16748316952078318	0.1770742810292487
0.1684192118191733	0.17686855413680277
0.16933444284222562	0.17666587733715425
0.17022931211281644	0.1764662140159213
0.1711042584233119	0.17626952810083638
0.17195971012425557	0.17607578405169305
0.17279608540434152	0.1758849468505158
0.17361379256196224	0.17569698199194797
0.17441323026861566	0.17551185547385076
0.17519478782444203	0.17532953378811006
0.17595884540615167	0.17514998391164333
0.17670577430759596	0.17497317329760353
0.17743593717322487	0.17479906986677365
0.17814968822466334	0.1746276419991479
0.17884737348063368	0.17445885852569443
0.1795293309704402	0.17429268872029519
0.180195890941226	0.17412910229185843
0.18084737605920373	0.17396806937659967
0.18148410160505477	0.17380956053048666
0.18210637566368565	0.17365354672184463
0.18271449930852135	0.1734999993241178
0.18330876678051192	0.17334889010878288
0.1838894656620193	0.1732001912384116
0.1844568770457485	0.17305387525987811
0.1850112756988791	0.1729099150977076
0.18555293022254904	0.17276828404756328
0.18608210320683674	0.17262895576986798
0.1865990513813828	0.17249190428355715
0.1871040257617878	0.17235710395996032
0.18759727179191693	0.17222452951680742
0.18807902948223984	0.17209415601235814
0.18854953354432719	0.17196595883964977
0.18900901352162333	0.1718399137208623
0.18945769391660922	0.17171599670179685
0.18989579431446596	0.17159418414646552
0.1903235295033469	0.1714744527317896
0.19074110959136062	0.1713567794424039
0.19114874012036404	0.17124114156556455
0.1915466221766649	0.17112751668615775
0.19193495249872344	0.17101588268180773
0.1923139235819458	0.17090621771808093
0.19268372378065585	0.1707985002437844
0.193044537407329	0.17069270898635666
0.1933965448291705	0.17058882294734848
0.19373992256211697	0.17048682139799137
0.19407484336233632	0.17038668387485265
0.19440147631530225	0.17028839017557398
0.1947199869225118	0.17019192035469255
0.19503053718591729	0.17009725471954235
0.19533328569013894	0.17000437382623398
0.19562838768252216	0.16991325847571134
0.19591599515110314	0.16982388970988327
0.1961962569005427	0.16973624880782884
0.19646931862608757	0.16965031728207397
0.1967353229856154	0.16956607687493896
0.19699440966981918	0.16948350955495406
0.19724671547058392	0.16940259751334227
0.1974923743476073	0.16932332316056853
0.19773151749331408	0.16924566912295222
0.1979642733961136	0.1691696182393432
0.1981907679020457	0.16909515355785923
0.19841112427486218	0.16902225833268328
0.19862546325458671	0.1689509160209205
0.1988339031145963	0.16888111027951175
0.19903655971726578	0.16881282496220468
0.199233546568215	0.1687460441165791
0.19942497486919805	0.16868075198112711
0.19961095356967196	0.16861693298238556
0.19979158941708114	0.1685545717321207
0.19996698700589383	0.16849365302456332
0.2001372488254236	0.16843416183369364
0.2003024753064703	0.16837608331057474
0.2004627648668124	0.1683194027807335
0.2006182139555819	0.16826410574158843
0.20076891709655226	0.16821017785992268
0.20091496693036875	0.16815760496940216
0.20105645425575047	0.16810637306813725
0.20119346806969046	0.16805646831628743
0.20132609560668213	0.1680078770337077
0.20145442237699762	0.16796058569763658
0.20157853220404315	0.16791458094042397
0.20169850726081634	0.16786984954729872
0.20181442810548972	0.16782637845417497
0.20192637371614255	0.16778415474549585
0.20203442152466464	0.16774316565211542
0.20213864744985333	0.16770339854921568
0.20223912592972498	0.16766484095426026
0.20233592995306174	0.16762748052498277
0.2024291310902137	0.16759130505740893
0.20251879952317542	0.16755630248391332
0.20260500407495574	0.16752246087130784
0.2026878122382605	0.16748976841896354
0.20276729020350365	0.1674582134569632
0.20284350288616634	0.16742778444428572
0.2029165139535194	0.16739846996702
0.20298638585072615	0.16737025873660988
0.20305317982634125	0.16734313958812677
0.20311695595722093	0.16731710147857248
0.20317777317286012	0.16729213348520902
0.20323568927917007	0.16726822480391665
0.2032907609817119	0.16724536474757867
0.20334304390839858	0.1672235427444929
0.20339259263168022	0.16720274833680895
0.20343946069022348	0.16718297117899125
0.2034837006101007	0.16716420103630691
0.2035253639254984	0.1671464277833386
0.2035645011989586	0.16712964140252082
0.2036011620411643	0.16711383198270013
0.20363539513028023	0.16709898971771905
0.20366724823086027	0.16708510490502199
0.20369676821233182	0.16707216794428387
0.20372400106706784	0.16706016933606066
0.2037489919280568	0.16704909968046133
0.20377178508618013	0.16703894967584113
0.20379242400710695	0.16702971011751533
0.20381095134781535	0.1670213718964933
0.20382740897274945	0.16701392599823295
0.20384183796962094	0.16700736350141424
0.20385427866486397	0.16700167557673218
0.20386477063875114	0.166996853485709
0.20387335274018	0.1669928885795242
0.20388006310113643	0.16698977229786333
0.20388493915084394	0.1669874961677846
0.2038880176296058	0.1669860518026028
0.20388933460234754	0.16698543090079065
0.20388892547186677	0.16698562524489713
0.20388682499179747	0.1669866267004821
0.20388306727929562	0.16698842721506765
0.20387768582745247	0.16699101881710524
0.20387071351744196	0.16699439361495877
0.20386218263040895	0.16699854379590276
0.2038521248591037	0.16700346162513618
0.20384057131926903	0.167009139444811
0.203827552560786	0.16701556967307524
0.20381309857858315	0.16702274480313078
0.20379723882331574	0.16703065740230486
0.20378000221181924	0.1670393001111361
0.20376141713734341	0.1670486656424735
0.20374151147957117	0.1670587467805895
0.2037203126144279	0.16706953638030558
0.20369784742368527	0.1670810273661315
0.20367414230436498	0.16709321273141683
0.20364922317794681	0.16710608553751505
0.20362311549938544	0.16711963891296014
0.2035958442659398	0.167133866052655
0.20356743402582075	0.16714876021707217
0.20353790888665932	0.1671643147314656
0.203507292523801	0.1671805229850946
0.20347560818842964	0.16719737843045848
0.2034428787155242	0.16721487458254294
0.20340912653165313	0.16723300501807653
0.20337437366260908	0.16725176337479858
0.20333864174088848	0.1672711433507373
0.20330195201301818	0.16729113870349852
0.20326432534673405	0.16731174324956408
0.20322578223801374	0.16733295086360092
0.2031863428179672	0.16735475547777973
0.20314602685958832	0.167377151081103
0.2031048537843704	0.16740013171874313
0.20306284266878855	0.16742369149138972
0.20302001225065247	0.16744782455460586
0.20297638093533138	0.1674725251181937
0.20293196680185516	0.16749778744556895
0.20288678760889353	0.1675236058531442
0.2028408608006159	0.16754997470972055
0.2027942035124356	0.1675768884358882
0.20274683257663934	0.16760434150343492
0.20269876452790583	0.16763232843476328
0.20265001560871526	0.16766084380231533
0.20260060177465192	0.16768988222800568
0.20255053869960293	0.16771943838266243
0.20249984178085434	0.1677495069854753
0.20244852614408781	0.16778008280345208
0.20239660664827908	0.16781116065088184
0.20234409789050128	0.1678427353888059
0.20229101421063433	0.1678748019244959
0.20223736969598266	0.16790735521093889
0.20218317818580334	0.16794039024632948
0.20212845327574655	0.16797390207356902
0.20207320832221007	0.16800788577977116
0.20201745644660957	0.16804233649577463
0.20196121053956687	0.16807724939566188
0.20190448326501712	0.16811261969628485
0.2018472870642378	0.16814844265679682
0.20178963415979978	0.16818471357819026
0.2017315365594433	0.16822142780284124
0.20167300605987953	0.16825858071405997
0.20161405425052006	0.1682961677356465
0.20155469251713493	0.16833418433145347
0.20149493204544155	0.16837262600495384
0.20143478382462546	0.16841148829881433
0.20137425865079409	0.16845076679447504
0.20131336713036596	0.16849045711173402
0.20125211968339518	0.16853055490833735
0.201190526546834	0.16857105587957505
0.20112859777773337	0.1686119557578817
0.2010663432563841	0.1686532503124425
0.2010037726893987	0.16869493534880445
0.2009408956127358	0.16873700670849245
0.20087772139466786	0.16877946026863072
0.20081425923869406	0.1688222919415685
0.2007505181863985	0.1688654976745111
0.20068650712025551	0.1689090734491554
0.20062223476638288	0.16895301528133017
0.2005577096972442	0.16899731922064096
0.20049294033430132	0.16904198135011939
0.20042793495061761	0.169086997785877
0.20036270167341352	0.16913236467676365
0.20029724848657499	0.16917807820402997
0.20023158323311602	0.16922413458099428
0.20016571361759558	0.16927053005271353
0.2000996472084913	0.16931726089565866
0.2000333914405284	0.16936432341739383
0.1999669536169676	0.16941171395625967
0.19990034091185008	0.16945942888106058
0.19983356037220268	0.1695074645907559
0.19976661892020234	0.16955581751415497
0.1996995233553016	0.169604484109616
0.19963228035631572	0.16965346086474833
0.1995648964834718	0.1697027442961191
0.19949737818042154	0.1697523309489628
0.1994297317762167	0.16980221739689483
0.19936196348725027	0.16985240024162845
0.19929407941916205	0.16990287611269528
0.19922608556870997	0.16995364166716903
0.19915798782560842	0.17000469358939305
0.19908979197433363	0.17005602859071053
0.19902150369589627	0.1701076434091986
0.1989531285695833	0.17015953480940546
0.1988846720746681	0.17021169958209045
0.1988161395920908	0.17026413454396774
0.1987475364061085	0.17031683653745264
0.1986788677059164	0.17036980243041128
0.19861013858723991	0.17042302911591328
0.19854135405389933	0.1704765135119872
0.19847251901934634	0.170530252561379
0.19840363830817365	0.1705842432313136
0.19833471665759828	0.170638482513259
0.1982657587189184	0.17069296742269333
0.19819676905894518	0.17074769499887463
0.19812775216140904	0.17080266230461338
0.19805871242834172	0.17085786642604794
0.197989654181434	0.170913304472422
0.19792058166336993	0.1709689735758656
0.1978514990391377	0.17102487089117782
0.19778241039731773	0.17108099359561263
0.1977133197513487	0.1711373388886669
0.197644231040771	0.17119390399187112
0.1975751481324495	0.17125068614858246
0.1975060748217746	0.1713076826237802
0.19743701483384263	0.17136489070386363
0.197367971824616	0.1714223076964522
0.1972989493820636	0.17147993093018812
0.1972299510272812	0.17153775775454105
0.19716098021559275	0.17159578553961524
0.19709204033763314	0.17165401167595876
0.1970231347204118	0.171712433574375
0.19695426662835874	0.17177104866573614
0.19688543926435242	0.1718298544007992
0.19681665577072993	0.17188884825002365
0.19674791923028045	0.1719480277033914
0.19667923266722145	0.17200739027022882
0.1966105990481584	0.17206693347903085
0.19654202128302817	0.17212665487728673
0.19647350222602666	0.17218655203130828
0.19640504467652048	0.1722466225260596
0.19633665137994316	0.17230686396498895
0.19626832502867686	0.1723672739698626
0.1962000682629182	0.1724278501806002
0.19613188367153067	0.17248859025511235
0.19606377379288153	0.17254949186913981
0.19599574111566587	0.17261055271609466
0.19592778807971573	0.1726717705069028
0.19585991707679654	0.1727331429698489
0.19579213045138966	0.1727946678504224
0.1957244305014622	0.17285634291116564
0.19565681947922392	0.17291816593152345
0.1955892995918712	0.17298013470769458
0.1955218730023191	0.17304224705248447
0.19545454182992114	0.1731045007951601
0.19538730815117675	0.17316689378130595
0.1953201740004274	0.1732294238726819
0.19525314137054112	0.17329208894708234
0.19518621221358562	0.17335488689819725
0.19511938844149018	0.17341781563547443
0.19505267192669673	0.1734808730839833
0.19498606450280048	0.1735440571842804
0.19491956796517934	0.17360736589227596
0.19485318407161356	0.1736707971791024
0.19478691454289496	0.17373434903098364
0.19472076106342617	0.17379801944910656
0.19465472528181016	0.1738618064494931
0.19458880881142954	0.17392570806287413
0.19452301323101776	0.17398972233456483
0.19445734008521898	0.17405384732434098
0.1943917908851409	0.1741180811063167
0.19432636710889678	0.17418242176882395
0.19426107020213979	0.1742468674142924
0.19419590157858826	0.17431141615913154
0.19413086262054235	0.17437606613361342
0.19406595467939244	0.17444081548175672
0.1940011790761192	0.1745056623612123
0.19393653710178552	0.17457060494314983
0.19387203001802064	0.1746356414121453
0.1938076590574963	0.17470076996607029
0.19374342542439532	0.17476598881598188
0.19367933029487247	0.17483129618601403
0.19361537481750796	0.17489669031327001
0.1935515601137537	0.1749621694477158
0.19348788727837238	0.1750277318520749
0.19342435737986924	0.17509337580172396
0.1933609714609174	0.17515909958458953
0.1932977305387758	0.1752249015010461
0.19323463560570092	0.17529077986381494
0.19317168762935139	0.17535673299786414
0.19310888755318692	0.17542275924030948
0.1930462362968599	0.17548885694031663
0.19298373475660144	0.17555502445900406
0.1929213838056011	0.1756212601693471
0.19285918429438015	0.17568756245608294
0.19279713705115972	0.17575392971561665
0.19273524288222213	0.17582036035592802
0.1926735025722673	0.1758868527964795
0.19261191688476292	0.17595340546812493
0.1925504865622893	0.1760200168130195
0.192489212326879	0.17608668528452998
0.19242809488035037	0.17615340934714674
0.1923671349046368	0.17622018747639592
0.1923063330621097	0.1762870181587527
0.1922456899958973	0.1763538998915557
0.19218520633019773	0.1764208311829219
0.19212488267058772	0.17648781055166257
0.1920647196043258	0.17655483652719997
0.19200471770065164	0.176621907649485
0.19194487751107947	0.17668902246891555
0.1918851995696881	0.17675617954625575
0.1918256843934054	0.17682337745255577
0.19176633248228903	0.176890614769073
0.19170714431980249	0.17695789008719326
0.19164812037308654	0.17702520200835328
0.19158926109322696	0.17709254914396405
0.19153056691551765	0.17715993011533424
0.19147203825971976	0.17722734355359523
0.19141367553031707	0.17729478809962626
0.1913554791167666	0.17736226240398054
0.1912974493937465	0.17742976512681213
0.19123958672139857	0.17749729493780356
0.19118189144556857	0.1775648505160937
0.1911243638980416	0.1776324305502071
0.19106700439677432	0.17770003373798343
0.19100981324612365	0.17776765878650772
0.1909527907370716	0.1778353044120415
0.19089593714744668	0.17790296933995425
0.19083925274214225	0.1779706523046559
0.1907827377733311	0.17803835204952967
0.19072639248067652	0.17810606732686562
0.1906702170915407	0.17817379689779492
0.19061421182118943	0.17824153953222494
0.1905583768729939	0.17830929400877427
0.19050271243862915	0.17837705911470927
0.19044721869826947	0.17844483364588057
0.1903918958207811	0.17851261640666027
0.1903367439639117	0.17858040620988014
0.19028176327447685	0.17864820187676986
0.19022695388854366	0.17871600223689627
0.19017231593161182	0.17878380612810282
0.19011784951879174	0.17885161239645003
0.19006355475497963	0.17891941989615617
0.19000943173503032	0.17898722748953844
0.1899554805439274	0.1790550340469552
0.18990170125695022	0.17912283844674806
0.18984809393983904	0.1791906395751851
0.18979465864895717	0.17925843632640426
0.18974139543145074	0.1793262276023574
0.1896883043254062	0.1793940123127548
0.18963538536000502	0.17946178937501042
0.18958263855567636	0.17952955771418713
0.18953006392424732	0.17959731626294326
0.18947766146909073	0.17966506396147863
0.18942543118527103	0.17973279975748221
0.18937337305968727	0.17980052260607907
0.18932148707121493	0.17986823146977907
0.18926977319084448	0.17993592531842484
0.1892182313818186	0.18000360312914104
0.18916686159976687	0.18007126388628375
0.18911566379283876	0.18013890658139045
0.1890646379018342	0.18020653021313035
0.18901378386033246	0.18027413378725524
0.18896310159481897	0.1803417163165507
0.18891259102481006	0.1804092768207879
0.1888622520629763	0.1804768143266758
0.188812084615263	0.18054432786781371
0.18876208858100996	0.1806118164846441
0.18871226385306877	0.18067927922440644
0.18866261031791834	0.18074671514109075
0.18861312785577897	0.18081412329539195
0.18856381634072433	0.1808815027546647
0.18851467564079208	0.18094885259287824
0.18846570561809248	0.18101617189057218
0.18841690612891554	0.1810834597348121
0.18836827702383674	0.18115071521914608
0.18831981814782048	0.18121793744356124
0.1882715293403227	0.1812851255144409
0.1882234104353917	0.18135227854452188
0.18817546126176696	0.18141939565285245
0.1881276816429773	0.18148647596475062
0.18808007139743682	0.18155351861176233
0.18803263033853979	0.18162052273162094
0.18798535827475385	0.1816874874682059
0.18793825500971229	0.18175441197150297
0.187891320342304	0.18182129539756384
0.18784455406676293	0.18188813690846664
0.18779795597275606	0.18195493567227666
0.18775152584546953	0.18202169086300735
0.1877052634656939	0.18208840166058174
0.18765916860990806	0.18215506725079406
0.18761324105036167	0.182221686825272
0.1875674805551567	0.1822882595814389
0.18752188688832735	0.1823547847224766
0.18747645980991898	0.1824212614572884
0.18743119907606576	0.18248768900046242
0.18738610443906734	0.18255406657223527
0.1873411756474639	0.18262039339845615
0.1872964124461106	0.18268666871055098
0.18725181457625056	0.18275289174548703
0.1872073817755868	0.182819061745738
0.18716311377835315	0.18288517795924897
0.18711901031538403	0.18295123963940213
0.1870750711141832	0.18301724604498243
0.18703129589899142	0.1830831964401437
0.18698768439085306	0.1831490900943752
0.1869442363076821	0.18321492628246788
0.18690095136432613	0.18328070428448184
0.18685782927263078	0.18334642338571316
0.18681486974150163	0.18341208287666166
0.1867720724769668	0.18347768205299847
0.18672943718223706	0.18354322021553424
0.18668696355776604	0.18360869667018742
0.1866446513013093	0.18367411072795284
0.18660250010798213	0.1837394617048705
0.18656050967031693	0.18380474892199478
0.18651867967831948	0.18386997170536384
0.18647700981952448	0.18393512938596912
0.18643549977905002	0.18400022129972526
0.18639414923965147	0.1840652467874403
0.18635295788177458	0.1841302051947861
0.18631192538360725	0.18419509587226873
0.1862710514211314	0.1842599181751996
0.1862303356681731	0.1843246714636665
0.18618977779645268	0.18438935510250476
0.18614937747563365	0.1844539684612692
0.18610913437337095	0.18451851091420568
0.18606904815535874	0.1845829818402232
0.18602911848537695	0.18464738062286631
0.1859893450253375	0.18471170665028738
0.18594972743532984	0.1847759593152196
0.1859102653736655	0.1848401380149498
0.18587095849692212	0.18490424215129164
0.1858318064599869	0.18496827113055905
0.18579280891609926	0.18503222436353978
0.18575396551689283	0.18509610126546944
0.18571527591243686	0.18515990125600512
0.18567673975127702	0.18522362375920012
0.18563835668047532	0.1852872682034781
0.18560012634564999	0.1853508340216079
0.18556204839101392	0.18541432065067837
0.1855241224594134	0.18547772753207337
0.18548634819236548	0.18554105411144728
0.18544872523009528	0.1856042998387002
0.18541125321157248	0.18566746416795377
0.18537393177454725	0.18573054655752697
0.1853367605555859	0.1857935464699124
0.18529973919010537	0.1858564633717521
0.18526286731240799	0.18591929673381452
0.18522614455571498	0.18598204603097074
0.1851895705521999	0.1860447107421715
0.1851531449330213	0.186107290350424
0.185116867328355	0.18616978434276943
0.18508073736742592	0.18623219221026
0.18504475467853937	0.18629451344793654
0.18500891888911145	0.18635674755480652
0.18497322962569984	0.1864188940338215
0.18493768651403325	0.18648095239185544
0.18490228917904106	0.18654292213968313
0.18486703724488188	0.1866048027919581
0.18483193033497214	0.18666659386719175
0.18479696807201418	0.18672829488773174
0.18476215007802363	0.186789905379741
0.18472747597435663	0.18685142487317685
0.18469294538173642	0.18691285290177032
0.18465855792027963	0.18697418900300536
0.1846243132095223	0.18703543271809858
0.18459021086844496	0.18709658359197884
0.184556250515498	0.18715764117326722
0.18452243176862615	0.1872186050142572
0.18448875424529276	0.1872794746708944
0.1844552175625037	0.18734024970275748
0.1844218213368306	0.18740092967303829
0.1843885651844345	0.18746151414852255
0.1843554487210879	0.18752200269957078
0.18432247156219767	0.18758239490009923
0.18428963332282675	0.1876426903275607
0.18425693361771603	0.18770288856292616
0.18422437206130554	0.18776298919066592
0.18419194826775534	0.1878229917987311
0.18415966185096633	0.1878828959785355
0.18412751242460038	0.1879427013249372
0.18409549960210048	0.18800240743622051
0.1840636229967102	0.18806201391407823
0.18403188222149314	0.1881215203635937
0.1840002768893519	0.18818092639322315
0.1839688066130467	0.1882402316147782
0.18393747100521396	0.18829943564340856
0.1839062696783842	0.18835853809758468
0.18387520224499995	0.1884175385990806
0.18384426831743322	0.18847643677295703
0.1838134675080027	0.18853523224754443
0.18378279942899073	0.18859392465442626
0.18375226369265985	0.18865251362842245
0.1837218599112695	0.1887109988075728
0.18369158769709154	0.18876937983312053
0.18366144666242673	0.1888276563494964
0.18363143641961976	0.18888582800430195
0.18360155658107485	0.18894389444829424
0.18357180675927093	0.18900185533536928
0.183542186566776	0.18905971032254684
0.18351269561626216	0.18911745906995425
0.1834833335205195	0.1891751012408113
0.18345409989247047	0.18923263650141453
0.1834249943451836	0.18929006452112201
0.18339601649188708	0.1893473849723383
0.18336716594598207	0.18940459753049904
0.18333844232105595	0.1894617018740562
0.1833098452308951	0.18951869768446328
0.1832813742894977	0.1895755846461602
0.18325302911108604	0.18963236244655907
0.18322480931011897	0.1896890307760293
0.18319671450130365	0.1897455893278835
0.18316874429960783	0.18980203779836272
0.18314089832027086	0.1898583758866227
0.18311317617881573	0.18991460329471926
0.18308557749105972	0.18997071972759477
0.18305810187312593	0.19002672489306383
0.18303074894145374	0.19008261850179953
0.1830035183128095	0.19013840026731996
0.18297640960429717	0.19019406990597426
0.18294942243336837	0.1902496271369294
0.18292255641783248	0.19030507168215646
0.18289581117586665	0.19036040326641757
0.18286918632602533	0.1904156216172524
0.18284268148725003	0.19047072646496527
0.18281629627887847	0.190525717542612
0.18279003032065388	0.1905805945859868
0.18276388323273401	0.1906353573336098
0.18273785463569997	0.19069000552671378
0.1827119441505649	0.19074453890923193
0.1826861513987827	0.19079895722778495
0.18266047600225593	0.19085326023166876
0.18263491758334463	0.19090744767284196
0.18260947576487396	0.19096151930591346
0.1825841501701423	0.19101547488813048
0.18255894042292878	0.19106931417936612
0.18253384614750126	0.1911230369421075
0.18250886696862345	0.1911766429414436
0.18248400251156255	0.19123013194505348
0.18245925240209604	0.19128350372319447
0.18243461626651905	0.19133675804869038
0.18241009373165126	0.19138989469691992
0.18238568442484338	0.19144291344580505
0.1823613879739841	0.19149581407579946
0.18233720400750641	0.19154859636987737
0.1823131321543941	0.19160126011352197
0.18228917204418785	0.19165380509471425
0.18226532330699147	0.19170623110392193
0.18224158557347797	0.19175853793408817
0.18221795847489516	0.19181072538062074
0.18219444164307172	0.1918627932413809
0.18217103471042265	0.19191474131667266
0.18214773730995482	0.19196656940923207
0.18212454907527245	0.19201827732421614
0.18210146964058221	0.1920698648691927
0.18207849864069867	0.19212133185412938
0.18205563571104916	0.19217267809138336
0.1820328804876788	0.19222390339569095
0.18201023260725535	0.19227500758415705
0.18198769170707396	0.19232599047624505
0.18196525742506184	0.1923768518937665
0.18194292939978268	0.19242759166087103
0.1819207072704413	0.19247820960403628
0.1818985906768878	0.1925287055520578
0.18187657925962175	0.19257907933603924
0.18185467265979677	0.19262933078938227
0.18183287051922395	0.1926794597477771
0.18181117248037632	0.1927294660491924
0.18178957818639238	0.19277934953386583
0.18176808728108013	0.19282911004429432
0.18174669940892058	0.1928787474252246
0.18172541421507132	0.19292826152364373
0.18170423134537028	0.19297765218876967
0.18168315044633887	0.19302691927204169
0.1816621711651854	0.19307606262711155
0.18164129314980842	0.19312508210983378
0.18162051604879975	0.19317397757825688
0.18159983951144787	0.1932227488926141
0.18157926318774037	0.1932713959153141
0.1815587867283675	0.1933199185109325
0.18153840978472469	0.1933683165462025
0.18151813200891537	0.19341658989000637
0.1814979530537537	0.19346473841336614
0.18147787257276715	0.1935127619894354
0.18145789022019926	0.1935606604934903
0.18143800565101176	0.19360843380292092
0.18141821852088744	0.19365608179722282
0.18139852848623206	0.19370360435798842
0.1813789352041769	0.1937510013688984
0.18135943833258095	0.1937982727157137
0.18134003753003286	0.19384541828626667
0.18132073245585328	0.19389243797045308
0.18130152277009673	0.1939393316602238
0.18128240813355354	0.1939860992495766
0.18126338820775179	0.19403274063454787
0.181244462654959	0.19407925571320478
0.18122563113818424	0.194125644385637
0.1812068933211794	0.19417190655394906
0.1811882488684411	0.1942180421222518
0.18116969744521222	0.19426405099665525
0.1811512387174836	0.1943099330852603
0.18113287235199502	0.1943556882981509
0.1811145980162371	0.19440131654738663
0.18109641537845267	0.19444681774699477
0.18107832410763758	0.1944921918129628
0.18106032387354268	0.19453743866323084
0.18104241434667434	0.19458255821768383
0.18102459519829603	0.19462755039814456
0.18100686610042938	0.19467241512836558
0.180989226725855	0.19471715233402248
0.18097167674811376	0.1947617619427061
0.18095421584150762	0.19480624388391526
0.18093684368110055	0.19485059808904975
0.18091955994271935	0.19489482449140294
0.18090236430295456	0.19493892302615473
0.18088525643916117	0.19498289363036414
0.18086823602945934	0.19502673624296255
0.18085130275273525	0.19507045080474683
0.18083445628864142	0.1951140372583719
0.1808176963175975	0.19515749554834405
0.180801022520791	0.19520082562101398
0.18078443458017732	0.19524402742456998
0.18076793217848078	0.19528710090903123
0.1807515149991947	0.19533004602624088
0.18073518272658193	0.1953728627298592
0.18071893504567504	0.19541555097535737
0.18070277164227688	0.1954581107200104
0.18068669220296077	0.19550054192289062
0.18067069641507064	0.19554284454486126
0.18065478396672136	0.1955850185485698
0.18063895454679882	0.19562706389844164
0.18062320784496022	0.1956689805606735
0.18060754355163394	0.19571076850322716
0.18059196135801986	0.1957524276958229
0.1805764609560892	0.19579395810993355
0.1805610420385846	0.1958353597187779
0.18054570429902012	0.19587663249731443
0.18053044743168112	0.19591777642223535
0.18051527113162413	0.19595879147196027
0.18050017509467686	0.19599967762663018
0.18048515901743795	0.1960404348681012
0.18047022259727685	0.19608106317993873
0.1804553655323335	0.19612156254741128
0.1804405875215181	0.19616193295748457
0.180425888264511	0.19620217439881554
0.1804112674617622	0.1962422868617466
0.1803967248144912	0.19628227033829948
0.18038226002468644	0.19632212482216949
0.18036787279510516	0.19636185030872008
0.18035356282927278	0.19640144679497662
0.1803393298314826	0.19644091427962063
0.1803251735067953	0.19648025276298464
0.18031109356103847	0.19651946224704603
0.18029708970080605	0.1965585427354215
0.18028316163345792	0.19659749423336156
0.18026930906711922	0.19663631674774504
0.18025553171067984	0.19667501028707335
0.18024182927379376	0.19671357486146523
0.18022820146687857	0.19675201048265106
0.18021464800111464	0.1967903171639676
0.1802011685884447	0.19682849492035256
0.18018776294157268	0.19686654376833918
0.18017443077396367	0.19690446372605086
0.18016117179984265	0.19694225481319616
0.18014798573419394	0.1969799170510632
0.18013487229276057	0.1970174504625145
0.18012183119204314	0.19705485507198178
0.18010886214929944	0.19709213090546096
0.1800959648825432	0.19712927799050675
0.18008313911054363	0.1971662963562278
0.18007038455282437	0.19720318603328124
0.18005770092966245	0.19723994705386824
0.18004508796208776	0.19727657945172822
0.18003254537188187	0.1973130832621346
0.18002007288157723	0.1973494585218891
0.18000767021445607	0.19738570526931754
0.17999533709454962	0.1974218235442643
0.17998307324663707	0.1974578133880881
0.17997087839624443	0.19749367484365632
0.17995875226964378	0.197529407955341
0.17994669459385204	0.1975650127690134
0.17993470509663	0.19760048933203966
0.1799227835064814	0.19763583769327592
0.17991092955265148	0.19767105790306358
0.17989914296512635	0.19770615001322447
0.17988742347463163	0.19774111407705675
0.17987577081263142	0.1977759501493294
0.17986418471132715	0.1978106582862785
0.17985266490365648	0.19784523854560207
0.1798412111232921	0.1978796909864558
0.17982982310464063	0.19791401566944833
0.17981850058284143	0.19794821265663679
0.1798072432937654	0.19798228201152268
0.17979605097401383	0.1980162237990469
0.1797849233609171	0.19805003808558563
0.1797738601925335	0.19808372493894574
0.17976286120764817	0.1981172844283608
0.1797519261457716	0.19815071662448625
0.17974105474713853	0.1981840215993953
0.17973024675270666	0.19821719942657479
0.17971950190415537	0.19825025018092074
0.17970881994388446	0.19828317393873385
0.17969820061501285	0.19831597077771604
0.17968764366137735	0.19834864077696512
0.1796771488275312	0.19838118401697183
0.17966671585874283	0.19841360057961469
0.17965634450099466	0.19844589054815656
0.1796460345009816	0.1984780540072401
0.1796357856061097	0.19851009104288375
0.17962559756449503	0.19854200174247802
0.17961547012496193	0.1985737861947809
0.17960540303704212	0.1986054444899142
0.17959539605097286	0.19863697671935965
0.17958544891769596	0.19866838297595443
0.1795755613888561	0.198699663353888
0.1795657332167997	0.19873081794869724
0.17955596415457314	0.19876184685726325
0.17954625395592191	0.1987927501778073
0.17953660237528857	0.19882352800988665
0.17952700916781178	0.19885418045439132
0.17951747408932478	0.19888470761353966
0.17950799689635374	0.19891510959087466
0.17949857734611663	0.19894538649126062
0.17948921519652156	0.19897553842087892
0.17947991020616544	0.19900556548722445
0.17947066213433238	0.199035467799102
0.1794614707409924	0.19906524546662208
0.17945233578679995	0.19909489860119803
0.17944325703309222	0.19912442731554164
0.17943423424188804	0.19915383172365997
0.17942526717588603	0.1991831119408517
0.17941635559846322	0.19921226808370296
0.17940749927367378	0.1992413002700847
0.17939869796624724	0.19927020861914826
0.17938995144158715	0.19929899325132247
0.17938125946576944	0.19932765428830962
0.17937262180554114	0.19935619185308237
0.17936403822831865	0.19938460606987995
0.1793555085021863	0.19941289706420506
0.1793470323958949	0.19944106496281994
0.1793386096788601	0.1994691098937434
0.179330240121161	0.19949703198624716
0.17932192349353843	0.1995248313708525
0.17931365956739365	0.19955250817932682
0.17930544811478671	0.19958006254468064
0.17929728890843477	0.19960749460116378
0.17928918172171088	0.19963480448426224
0.17928112632864213	0.199661992330695
0.17927312250390826	0.19968905827841074
0.1792651700228401	0.19971600246658436
0.179257268661418	0.19974282503561377
0.17924941819627033	0.19976952612711696
0.1792416184046718	0.19979610588392854
0.17923386906454206	0.19982256445009647
0.17922616995444401	0.19984890197087904
0.17921852085358225	0.1998751185927416
0.17921092154180182	0.1999012144633537
0.17920337179958606	0.19992718973158538
0.17919587140805557	0.19995304454750468
0.1791884201489664	0.19997877906237402
0.17918101780470858	0.2000043934286477
0.17917366415830438	0.20002988779996808
0.17916635899340694	0.20005526233116344
0.1791591020942987	0.20008051717824404
0.1791518932458896	0.20010565249839957
0.1791447322337158	0.2001306684499963
0.17913761884393778	0.20015556519257383
0.17913055286333918	0.200180342886842
0.17912353407932488	0.20020500169467834
0.1791165622799195	0.2002295417791247
0.179109637253766	0.20025396330438475
0.17910275879012383	0.20027826643582078
0.1790959266788676	0.20030245133995067
0.17908914071048534	0.20032651818444538
0.179082400676077	0.2003504671381258
0.1790757063673529	0.20037429837096052
0.179069057576632	0.20039801205406169
0.17906245409684057	0.20042160835968348
0.17905589572151037	0.20044508746121886
0.1790493822447772	0.20046844953319634
0.17904291346137935	0.20049169475127818
0.1790364891666559	0.20051482329225637
0.17903010915654524	0.20053783533405103
0.17902377322758353	0.20056073105570704
0.17901748117690303	0.20058351063739135
0.17901123280223047	0.20060617426039057
0.17900502790188572	0.20062872210710805
0.17899886627478	0.2006511543610611
0.17899274772041435	0.20067347120687876
0.1789866720388781	0.20069567283029852
0.1789806390308473	0.20071775941816417
0.17897464849758304	0.20073973115842295
0.1789687002409301	0.2007615882401232
0.1789627940633151	0.20078333085341127
0.17895692976774522	0.2008049591895294
0.17895110715780638	0.20082647344081278
0.1789453260376619	0.2008478738006875
0.17893958621205067	0.20086916046366735
0.1789338874862859	0.20089033362535166
0.17892822966625332	0.20091139348242287
0.1789226125584097	0.20093234023264378
0.17891703596978126	0.20095317407485497
0.17891149970796222	0.20097389520897274
0.17890600358111308	0.20099450383598633
0.17890054739795924	0.20101500015795531
0.17889513096778928	0.20103538437800747
0.1788897541004535	0.20105565670033626
0.17888441660636228	0.2010758173301982
0.1788791182964848	0.20109586647391076
0.1788738589823471	0.20111580433884974
0.1788686384760308	0.2011356311334467
0.17886345659017155	0.2011553470671874
0.1788583131379573	0.20117495235060812
0.17885320793312698	0.2011944471952947
0.1788481407899688	0.20121383181387914
0.1788431115233189	0.20123310642003767
0.17883811994855953	0.20125227122848852
0.17883316588161785	0.20127132645498957
0.17882824913896414	0.20129027231633587
0.17882336953761027	0.2013091090303574
0.17881852689510852	0.2013278368159172
0.17881372102954962	0.20134645589290823
0.1788089517595614	0.20136496648225216
0.17880421890430742	0.20138336880589636
0.17879952228348517	0.20140166308681196
0.17879486171732478	0.2014198495489916
0.17879023702658747	0.20143792841744712
0.17878564803256392	0.20145589991820773
0.1787810945570728	0.2014737642783172
0.17877657642245942	0.20149152172583218
0.17877209345159412	0.2015091724898199
0.17876764546787055	0.20152671680035586
0.17876323229520458	0.20154415488852187
0.17875885375803255	0.20156148698640394
0.17875450968130985	0.20157871332708985
0.17875019989050928	0.20159583414466728
0.17874592421161986	0.2016128496742218
0.17874168247114508	0.20162976015183443
0.17873747449610156	0.20164656581458001
0.1787333001140174	0.20166326690052447
0.17872915915293092	0.20167986364872342
0.17872505144138912	0.20169635629921986
0.17872097680844606	0.20171274509304202
0.1787169350836615	0.2017290302722011
0.17871292609709954	0.20174521207969004
0.17870894967932693	0.20176129075948068
0.1787050056614119	0.20177726655652203
0.17870109387492225	0.20179313971673843
0.17869721415192438	0.2018089104870274
0.17869336632498156	0.20182457911525767
0.1786895502271525	0.20184014585026705
0.17868576569199	0.20185561094186077
0.17868201255353938	0.20187097464080958
0.17867829064633722	0.2018862371988472
0.17867459980540973	0.20190139886866904
0.1786709398662713	0.20191645990393
0.17866731066492336	0.2019314205592425
0.17866371203785253	0.2019462810901748
0.17866014382202952	0.20196104175324858
0.1786566058549076	0.20197570280593796
0.1786530979744211	0.2019902645066664
0.17864962001898416	0.20200472711480594
0.178646171827489	0.20201909089067482
0.17864275323930495	0.20203335609553544
0.17863936409427678	0.20204752299159312
0.17863600423272308	0.20206159184199343
0.17863267349543543	0.20207556291082124
0.17862937172367643	0.20208943646309818
0.17862609875917868	0.20210321276478116
0.17862285444414305	0.20211689208276054
0.17861963862123775	0.20213047468485842
0.17861645113359642	0.20214396083982641
0.17861329182481722	0.20215735081734448
0.178610160538961	0.20217064488801864
0.17860705712055025	0.20218384332337955
0.17860398141456774	0.2021969463958806
0.1786009332664547	0.20220995437889588
0.17859791252211019	0.20222286754671912
0.178594919027889	0.2022356861745613
0.17859195263060074	0.20224841053854942
0.1785890131775083	0.20226104091572406
0.17858610051632656	0.20227357758403855
0.17858321449522102	0.20228602082235675
0.17858035496280641	0.2022983709104514
0.1785775217681454	0.20231062812900266
0.17857471476074727	0.2023227927595958
0.1785719337905664	0.20233486508472073
0.17856917870800126	0.20234684538776868
0.1785664493638926	0.20235873395303203
0.17856374560952268	0.202370531065702
0.17856106729661353	0.20238223701186686
0.17855841427732574	0.20239385207851082
0.17855578640425718	0.2024053765535116
0.17855318353044158	0.2024168107256396
0.17855060550934745	0.20242815488455607
0.17854805219487646	0.20243940932081117
0.17854552344136232	0.2024505743258424
0.17854301910356934	0.20246165019197387
0.1785405390366915	0.20247263721241326
0.1785380830963506	0.20248353568125155
0.17853565113859532	0.20249434589346066
0.17853324301989978	0.20250506814489216
0.1785308585971625	0.2025157027322757
0.17852849772770477	0.20252624995321744
0.1785261602692695	0.2025367101061985
0.17852384608002014	0.20254708349057343
0.178521555018539	0.2025573704065684
0.17851928694382643	0.20256757115528035
0.17851704171529925	0.20257768603867493
0.17851481919278953	0.2025877153595848
0.17851261923654338	0.20259765942170865
0.17851044170721964	0.20260751852960956
0.1785082864658888	0.2026172929887134
0.17850615337403147	0.20262698310530702
0.17850404229353728	0.2026365891865376
0.1785019530867037	0.2026461115404103
0.17849988561623453	0.20265555047578715
0.1784978397452392	0.20266490630238604
0.1784958153372308	0.20267417933077847
0.17849381225612554	0.20268336987238839
0.1784918303662409	0.202692478239491
0.178489869532295	0.2027015047452111
0.17848792961940504	0.2027104497035217
0.17848601049308602	0.20271931342924243
0.17848411201924969	0.20272809623803867
0.17848223406420322	0.20273679844641906
0.17848037649464835	0.20274542037173526
0.17847853917767953	0.20275396233218018
0.17847672198078324	0.20276242464678595
0.17847492477183666	0.20277080763542343
0.17847314741910625	0.2027791116188002
0.1784713897912471	0.20278733691845952
0.17846965175730112	0.20279548385677904
0.17846793318669613	0.2028035527569687
0.17846623394924485	0.2028115439430705
0.17846455391514332	0.20281945773995602
0.17846289295497014	0.2028272944733261
0.17846125093968504	0.20283505446970862
0.17845962774062768	0.20284273805645753
0.17845802322951676	0.2028503455617519
0.17845643727844848	0.20285787731459365
0.17845486975989572	0.20286533364480724
0.1784533205467067	0.2028727148830377
0.17845178951210383	0.20288002136074956
0.1784502765296826	0.2028872534102254
0.17844878147341053	0.20289441136456482
0.17844730421762578	0.20290149555768283
0.17844584463703628	0.20290850632430862
0.1784444026067184	0.20291544399998468
0.17844297800211584	0.20292230892106472
0.17844157069903874	0.20292910142471327
0.17844018057366212	0.2029358218489038
0.1784388075025252	0.20294247053241782
0.1784374513625299	0.2029490478148432
0.17843611203093995	0.2029555540365734
0.17843478938537985	0.2029619895388059
0.17843348330383355	0.20296835466354096
0.17843219366464333	0.2029746497535806
0.1784309203465089	0.20298087515252755
0.17842966322848614	0.20298703120478295
0.17842842218998617	0.2029931182555465
0.178427197110774	0.20299913665081432
0.1784259878709676	0.20300508673737827
0.17842479435103684	0.20301096886282444
0.17842361643180232	0.2030167833755318
0.17842245399443435	0.2030225306246713
0.17842130692045183	0.2030282109602048
0.17842017509172114	0.20303382473288362
0.17841905839045508	0.20303937229424707
0.1784179566992121	0.20304485399662192
0.17841686990089467	0.20305027019312089
0.17841579787874867	0.20305562123764131
0.17841474051636214	0.20306090748486433
0.17841369769766416	0.20306612929025342
0.17841266930692418	0.2030712870100535
0.17841165522875047	0.20307638100128939
0.1784106553480892	0.20308141162176507
0.17840966955022372	0.20308637923006256
0.17840869772077322	0.2030912841855403
0.1784077397456917	0.20309612684833245
0.17840679551126706	0.2031009075793475
0.17840586490411992	0.2031056267402674
0.1784049478112028	0.20311028469354636
0.17840404411979874	0.20311488180240955
0.17840315371752086	0.20311941843085202
0.17840227649231072	0.2031238949436378
0.17840141233243767	0.20312831170629886
0.17840056112649766	0.2031326690851335
0.17839972276341245	0.20313696744720589
0.1783988971324284	0.20314120716034417
0.17839808412311553	0.20314538859314052
0.1783972836253665	0.20314951211494903
0.17839649552939563	0.20315357809588508
0.17839571972573798	0.20315758690682395
0.17839495610524825	0.20316153891940064
0.1783942045590998	0.2031654345060075
0.1783934649787837	0.20316927403979412
0.17839273725610774	0.20317305789466583
0.1783920212831956	0.20317678644528298
0.17839131695248547	0.20318046006705975
0.1783906241567296	0.20318407913616282
0.17838994278899284	0.20318764402951056
0.17838927274265193	0.20319115512477215
0.1783886139113947	0.20319461280036638
0.1783879661892188	0.20319801743546045
0.17838732947043068	0.2032013694099694
0.178386703649645	0.20320466910455454
0.17838608862178357	0.2032079169006228
0.17838548428207407	0.20321111318032564
0.1783848905260495	0.20321425832655798
0.17838430724954704	0.20321735272295732
0.1783837343487072	0.20322039675390274
0.17838317171997278	0.20322339080451313
0.17838261926008805	0.2032263352606476
0.17838207686609775	0.20322923050890368
0.1783815444353461	0.20323207693661594
0.178381021865476	0.20323487493185588
0.17838050905442818	0.20323762488343045
0.17838000590043987	0.2032403271808811
0.17837951230204444	0.2032429822144829
0.17837902815807005	0.20324559037524337
0.1783785533676389	0.20324815205490204
0.17837808783016645	0.20325066764592892
0.17837763144536029	0.20325313754152347
0.1783771841132193	0.20325556213561446
0.17837674573403284	0.2032579418228581
0.17837631620837974	0.20326027699863758
0.1783758954371276	0.20326256805906195
0.17837548332143155	0.2032648154009652
0.17837507976273373	0.20326701942190567
0.17837468466276213	0.20326918052016446
0.17837429792352993	0.20327129909474495
0.1783739194473344	0.2032733755453719
0.17837354913675624	0.2032754102724902
0.1783731868946585	0.203277403677264
0.1783728326241858	0.20327935616157639
0.17837248622876353	0.20328126812802771
0.17837214761209694	0.2032831399799349
0.17837181667817015	0.20328497212133084
0.1783714933312454	0.20328676495696318
0.17837117747586229	0.2032885188922936
0.17837086901683674	0.20329023433349658
0.17837056785926014	0.20329191168745864
0.17837027390849877	0.20329355136177835
0.17836998707019253	0.2032951537647636
0.17836970725025456	0.20329671930543247
0.1783694343548699	0.2032982483935113
0.1783691682904951	0.2032997414394343
0.17836890896385715	0.2033011988543424
0.17836865628195256	0.20330262105008262
0.1783684101520468	0.20330400843920704
0.17836817048167336	0.20330536143497197
0.17836793717863272	0.2033066804513371
0.17836771015099182	0.2033079659029643
0.17836748930708304	0.20330921820521775
0.17836727455550355	0.2033104377741619
0.17836706580511436	0.2033116250265612
0.1783668629650395	0.2033127803798796
0.1783666659446653	0.20331390425227874
0.17836647465363945	0.2033149970626179
0.1783662890018705	0.2033160592304531
0.1783661088995266	0.2033170911760357
0.1783659342570351	0.20331809332031242
0.17836576498508144	0.20331906608492356
0.17836560099460863	0.20332000989220317
0.1783654421968164	0.20332092516517736
0.17836528850316014	0.20332181232756386
0.17836513982535043	0.20332267180377128
0.1783649960753521	0.20332350401889798
0.1783648571653836	0.20332430939873208
0.17836472300791598	0.20332508836974883
0.17836459351567224	0.20332584135911258
0.17836446860162672	0.20332656879467287
0.17836434817900387	0.20332727110496623
0.17836423216127814	0.20332794871921372
0.1783641204621725	0.20332860206732117
0.1783640129956583	0.20332923157987737
0.17836390967595395	0.20332983768815444
0.17836381041752467	0.20333042082410596
0.17836371513508142	0.20333098142036699
0.17836362374358028	0.20333151991025283
0.17836353615822145	0.20333203672775835
0.1783634522944489	0.20333253230755732
0.17836337206794936	0.20333300708500152
0.17836329539465157	0.20333346149612003
0.17836322219072565	0.20333389597761836
0.17836315237258224	0.20333431096687782
0.17836308585687194	0.20333470690195476
0.17836302256048428	0.20333508422157948
0.17836296240054741	0.20333544336515597
0.17836290529442692	0.2033357847727607
0.17836285115972542	0.20333610888514247
0.17836279991428153	0.2033364161437209
0.17836275147616967	0.20333670699058598
0.17836270576369875	0.2033369818684978
0.17836266269541173	0.20333724122088503
0.17836262219008497	0.2033374854918446
0.1783625841667273	0.20333771512614107
0.17836254854457956	0.20333793056920568
0.1783625152431137	0.20333813226713549
0.17836248418203207	0.203338320666693
0.17836245528126687	0.20333849621530525
0.17836242846097927	0.20333865936106293
0.17836240364155892	0.20333881055271985
0.17836238074362298	0.20333895023969234
0.17836235968801564	0.2033390788720581
0.17836234039580728	0.20333919690055613
0.17836232278829403	0.20333930477658507
0.17836230678699674	0.20333940295220382
0.17836229231366046	0.20333949188012945
0.1783622792902538	0.20333957201373715
0.1783622676389681	0.2033396438070597
0.17836225728221705	0.2033397077147865
0.17836224814263563	0.20333976419226285
0.17836224014307966	0.20333981369548948
0.17836223320662503	0.2033398566811213
0.17836222725656709	0.2033398936064676
0.17836222221642006	0.20333992492949055
0.1783622180099162	0.20333995110880465
0.17836221456100515	0.2033399726036767
0.17836221179385348	0.20333998987402424
0.17836220963284355	0.2033400033804152
0.17836220800257369	0.20334001358406772
0.17836220682785653	0.20334002094684844
0.17836220603371916	0.20334002593127298
0.1783622055454021	0.20334002900050407
0.1783622052883585	0.20334003061835187
0.1783622051882541	0.20334003124927325
0.17836220517096585	0.20334003135837014
0.17836220516258178	0.2033400314113895
0.1783622050894	0.20334003187472338
0.1783622048779285	0.20334003321540722
0.1783622044548841	0.20334003590111932
0.17836220374719197	0.2033400404001805
0.17836220268198505	0.20334004718155352
0.17836220118660323	0.20334005671484184
0.17836219918859306	0.20334006947028993
0.1783621966157068	0.2033400859187816
0.1783621933959019	0.20334010653184031
0.1783621894573404	0.2033401317816273
0.17836218472838827	0.2033401621409423
0.17836217913761498	0.20334019808322218
0.17836217261379253	0.20334024008253976
0.17836216508589509	0.2033402886136051
0.17836215648309828	0.20334034415176244
0.17836214673477865	0.20334040717299107
0.17836213577051313	0.20334047815390438
0.17836212352007808	0.20334055757174918
0.17836210991344906	0.20334064590440515
0.17836209488080007	0.20334074363038396
0.17836207835250298	0.20334085122882894
0.17836206025912685	0.20334096917951455
0.17836204053143748	0.20334109796284505
0.17836201910039665	0.20334123805985516
0.17836199589716167	0.2033413899522078
0.17836197085308464	0.2033415541221949
0.1783619438997121	0.20334173105273623
0.1783619149687842	0.20334192122737893
0.17836188399223415	0.20334212513029637
0.1783618509021877	0.20334234324628803
0.1783618156309627	0.2033425760607791
0.1783617781110682	0.20334282405981957
0.1783617382752041	0.2033430877300832
0.17836169605626054	0.20334336755886806
0.17836165138731713	0.20334366403409498
0.17836160420164288	0.20334397764430684
0.17836155443269497	0.2033443088786689
0.17836150201411866	0.20334465822696723
0.17836144687974653	0.20334502617960953
0.17836138896359796	0.20334541322762179
0.17836132819987865	0.2033458198626516
0.17836126452297985	0.20334624657696365
0.1783611978674779	0.20334669386344228
0.17836112816813374	0.20334716221558874
0.17836105535989244	0.20334765212752198
0.17836097937788226	0.20334816409397682
0.17836090015741454	0.2033486986103052
0.17836081763398287	0.2033492561724735
0.1783607317432626	0.20334983727706346
0.17836064242111055	0.20335044242127126
0.17836054960356393	0.20335107210290632
0.17836045322684027	0.2033517268203915
0.17836035322733668	0.2033524070727621
0.17836024954162932	0.20335311335966594
0.17836014210647302	0.20335384618136193
0.17836003085880045	0.2033546060387199
0.17835991573572177	0.2033553934332199
0.17835979667452415	0.20335620886695244
0.178359673612671	0.20335705284261651
0.17835954648780183	0.2033579258635202
0.17835941523773136	0.20335882843357955
0.17835927980044913	0.20335976105731834
0.17835914011411902	0.2033607242398674
0.17835899611707853	0.20336171848696416
0.17835884774783864	0.20336274430495155
0.178358694945083	0.20336380220077838
0.1783585376476673	0.20336489268199825
0.1783583757946191	0.20336601625676898
0.17835820932513713	0.2033671734338519
0.17835803817859072	0.2033683647226125
0.17835786229451947	0.20336959063301785
0.1783576816126325	0.20337085167563784
0.17835749607280807	0.20337214836164408
0.17835730561509333	0.20337348120280913
0.17835711017970327	0.20337485071150602
0.17835690970702067	0.20337625740070786
0.17835670413759538	0.20337770178398756
0.17835649341214385	0.20337918437551677
0.1783562774715488	0.2033807056900659
0.17835605625685855	0.20338226624300293
0.1783558297092864	0.20338386655029372
0.17835559777021048	0.20338550712850068
0.17835536038117306	0.20338718849478277
0.17835511748388008	0.20338891116689506
0.17835486902020056	0.20339067566318753
0.17835461493216634	0.2033924825026056
0.17835435516197135	0.20339433220468867
0.17835408965197147	0.20339622528956974
0.1783538183446836	0.20339816227797586
0.17835354118278557	0.2034001436912264
0.17835325810911534	0.203402170051233
0.1783529690666708	0.20340424188049927
0.1783526739986092	0.20340635970212034
0.17835237284824665	0.20340852403978182
0.1783520655590575	0.20341073541775984
0.17835175207467419	0.20341299436091997
0.17835143233888645	0.20341530139471797
0.17835110629564133	0.20341765704519726
0.178350773889042	0.20342006183899036
0.1783504350633479	0.20342251630331776
0.17835008976297412	0.20342502096598647
0.17834973793249054	0.20342757635539105
0.17834937951662222	0.20343018300051213
0.17834901446024803	0.20343284143091667
0.17834864270840073	0.20343555217675607
0.17834826420626632	0.20343831576876775
0.1783478788991839	0.20344113273827252
0.1783474867326446	0.20344400361717607
0.17834708765229174	0.2034469289379669
0.17834668160391998	0.20344990923371647
0.1783462685334751	0.2034529450380792
0.17834584838705356	0.20345603688529112
0.1783454211109018	0.2034591853101701
0.17834498665141607	0.20346239084811507
0.17834454495514185	0.20346565403510514
0.17834409596877346	0.20346897540769993
0.17834363963915364	0.20347235550303866
0.17834317591327306	0.20347579485883976
0.17834270473826982	0.2034792940134002
0.17834222606142913	0.20348285350559536
0.17834173983018298	0.20348647387487856
0.17834124599210938	0.20349015566127993
0.1783407444949322	0.20349389940540696
0.17834023528652065	0.20349770564844327
0.17833971831488893	0.20350157493214843
0.17833919352819552	0.20350550779885795
0.1783386608747432	0.20350950479148155
0.1783381203029783	0.20351356645350416
0.1783375717614904	0.20351769332898445
0.1783370151990118	0.2035218859625551
0.17833645056441721	0.20352614489942167
0.17833587780672341	0.2035304706853625
0.17833529687508853	0.20353486386672842
0.178334707718812	0.20353932499044203
0.1783341102873338	0.20354385460399693
0.1783335045302345	0.20354845325545873
0.17833289039723416	0.20355312149346239
0.17833226783819262	0.20355785986721336
0.17833163680310865	0.2035626689264869
0.17833099724211965	0.2035675492216274
0.1783303491055014	0.2035725013035477
0.1783296923436675	0.20357752572372934
0.1783290269071689	0.2035826230342212
0.17832835274669362	0.2035877937876402
0.17832766981306636	0.20359303853716976
0.1783269780572481	0.20359835783656022
0.17832627743033558	0.2036037522401275
0.17832556788356094	0.2036092223027537
0.17832484936829143	0.20361476857988603
0.17832412183602908	0.2036203916275368
0.17832338523841	0.20362609200228182
0.17832263952720417	0.20363187026126162
0.1783218846543151	0.2036377269621803
0.17832112057177935	0.2036436626633048
0.17832034723176626	0.2036496779234646
0.17831956458657747	0.20365577330205176
0.17831877258864637	0.20366194935902016
0.1783179711905381	0.20366820665488472
0.1783171603449488	0.20367454575072175
0.17831634000470545	0.20368096720816808
0.17831551012276547	0.20368747158942047
0.17831467065221626	0.20369405945723568
0.17831382154627473	0.2037007313749296
0.17831296275828712	0.2037074879063771
0.17831209424172872	0.20371432961601132
0.178311215950203	0.2037212570688237
0.17831032783744188	0.20372827083036366
0.1783094298573048	0.20373537146673737
0.17830852196377867	0.2037425595446079
0.17830760411097743	0.2037498356311948
0.17830667625314167	0.20375720029427397
0.1783057383446382	0.20376465410217637
0.17830479033995977	0.2037721976237885
0.17830383219372475	0.20377983142855183
0.1783028638606766	0.20378755608646199
0.17830188529568358	0.20379537216806848
0.17830089645373848	0.20380328024447458
0.17829989728995804	0.2038112808873368
0.17829888775958305	0.20381937466886424
0.1782978678179773	0.20382756216181874
0.17829683742062785	0.20383584393951398
0.17829579652314434	0.20384422057581508
0.17829474508125862	0.2038526926451385
0.17829368305082471	0.20386126072245164
0.17829261038781813	0.2038699253832721
0.17829152704833556	0.20387868720366764
0.17829043298859457	0.20388754676025522
0.17828932816493356	0.2038965046302018
0.17828821253381077	0.20390556139122296
0.17828708605180454	0.2039147176215823
0.1782859486756126	0.20392397390009154
0.1782848003620518	0.20393333080611092
0.17828364106805797	0.20394278891954687
0.1782824707506853	0.20395234882085356
0.17828128936710613	0.2039620110910314
0.17828009687461058	0.20397177631162672
0.17827889323060625	0.20398164506473193
0.17827767839261788	0.2039916179329846
0.17827645231828695	0.20400169549956737
0.17827521496537135	0.2040118783482081
0.17827396629174513	0.20402216706317738
0.17827270625539807	0.20403256222929134
0.17827143481443547	0.20404306443190867
0.17827015192707765	0.20405367425693127
0.17826885755165972	0.20406439229080436
0.17826755164663124	0.20407521912051446
0.17826623417055587	0.20408615533359065
0.17826490508211118	0.204097201518104
0.17826356434008803	0.20410835826266638
0.17826221190339053	0.2041196261564306
0.17826084773103545	0.20413100578908966
0.17825947178215235	0.20414249775087756
0.1782580840159827	0.2041541026325669
0.1782566843918798	0.20416582102547115
0.17825527286930865	0.20417765352144118
0.17825384940784525	0.20418960071286768
0.17825241396717675	0.20420166319267935
0.17825096650710054	0.20421384155434263
0.17824950698752462	0.20422613639186182
0.17824803536846656	0.2042385482997781
0.17824655161005382	0.20425107787316976
0.17824505567252302	0.20426372570765144
0.17824354751621996	0.2042764923993739
0.17824202710159884	0.20428937854502416
0.17824049438922238	0.204302384741824
0.1782389493397615	0.20431551158753042
0.1782373919139947	0.2043287596804354
0.178235822072808	0.20434212961936526
0.17823423977719438	0.20435562200367968
0.17823264498825397	0.2043692374332729
0.17823103766719312	0.20438297650857168
0.17822941777532472	0.20439683983053608
0.1782277852740673	0.20441082800065907
0.17822614012494517	0.20442494162096536
0.1782244822895879	0.20443918129401112
0.1782228117297301	0.20445354762288526
0.17822112840721116	0.20446804121120726
0.17821943228397474	0.20448266266312692
0.1782177233220688	0.2044974125833252
0.17821600148364497	0.20451229157701345
0.1782142667309586	0.20452730024993193
0.17821251902636814	0.20454243920835113
0.178210758332335	0.20455770905907023
0.17820898461142332	0.20457311040941767
0.17820719782629948	0.2045886438672495
0.17820539793973209	0.20460431004095087
0.17820358491459146	0.204620109539434
0.1782017587138494	0.20463604297213844
0.17819991930057888	0.20465211094903124
0.17819806663795387	0.20466831408060654
0.17819620068924902	0.20468465297788374
0.17819432141783914	0.20470112825240883
0.17819242878719932	0.20471774051625452
0.17819052276090416	0.20473449038201735
0.17818860330262815	0.20475137846281966
0.17818667037614463	0.20476840537230867
0.1781847239453261	0.20478557172465567
0.17818276397414368	0.20480287813455655
0.17818079042666668	0.20482032521723026
0.17817880326706273	0.20483791358841913
0.1781768024595973	0.20485564386438948
0.17817478796863329	0.2048735166619295
0.1781727597586309	0.20489153259834975
0.1781707177941472	0.20490969229148365
0.17816866203983633	0.20492799635968606
0.17816659246044864	0.20494644542183243
0.17816450902083053	0.20496504009732125
0.17816241168592462	0.20498378100606962
0.17816030042076889	0.20500266876851614
0.17815817519049693	0.20502170400562014
0.17815603596033733	0.20504088733886006
0.17815388269561339	0.20506021939023328
0.17815171536174312	0.20507970078225757
0.17814953392423868	0.205099332137969
0.1781473383487066	0.20511911408092204
0.1781451286008468	0.20513904723518955
0.17814290464645288	0.20515913222536253
0.1781406664514117	0.20517936967654893
0.17813841398170305	0.20519976021437447
0.17813614720339943	0.2052203044649818
0.17813386608266585	0.20524100305503035
0.17813157058575946	0.20526185661169527
0.1781292606790294	0.20528286576266852
0.17812693632891646	0.20530403113615686
0.178124597501953	0.20532535336088353
0.17812224416476236	0.2053468330660856
0.17811987628405873	0.20536847088151627
0.1781174938266472	0.20539026743744176
0.17811509675942325	0.20541222336464376
0.1781126850493724	0.20543433929441657
0.17811025866356994	0.2054566158585694
0.17810781756918106	0.20547905368942326
0.17810536173346037	0.20550165341981308
0.17810289112375136	0.2055244156830861
0.17810040570748664	0.20554734111310147
0.17809790545218745	0.20557043034423117
0.17809539032546334	0.20559368401135786
0.178092860295012	0.20561710274987638
0.17809031532861927	0.20564068719569267
0.17808775539415844	0.2056644379852225
0.17808518045959026	0.20568835575539324
0.17808259049296257	0.205712441143642
0.1780799854624104	0.20573669478791562
0.17807736533615526	0.2057611173266708
0.17807473008250518	0.20578570939887325
0.17807207966985436	0.20581047164399757
0.17806941406668295	0.20583540470202777
0.17806673324155706	0.20586050921345533
0.178064037163128	0.20588578581928063
0.1780613258001325	0.20591123516101112
0.17805859912139216	0.20593685788066168
0.1780558570958135	0.2059626546207558
0.17805309969238767	0.2059886260243221
0.17805032688018993	0.2060147727348965
0.17804753862837966	0.2060410953965221
0.17804473490620012	0.20606759465374658
0.17804191568297828	0.20609427115162404
0.17803908092812432	0.20612112553571404
0.17803623061113166	0.20614815845208184
0.1780333647015766	0.20617537054729596
0.17803048316911813	0.20620276246843106
0.17802758598349777	0.20623033486306613
0.17802467311453923	0.2062580883792826
0.17802174453214814	0.20628602366566706
0.178018800206312	0.20631414137130932
0.17801584010709978	0.20634244214580139
0.17801286420466195	0.20637092663923934
0.17800987246922992	0.20639959550222098
0.178006864871116	0.2064284493858471
0.17800384138071312	0.2064574889417196
0.17800080196849463	0.2064867148219427
0.17799774660501433	0.20651612767912209
0.17799467526090568	0.20654572816636474
0.17799158790688205	0.2065755169372775
0.1779884845137364	0.20660549464596878
0.17798536505234083	0.20663566194704708
0.17798222949364678	0.2066660194956209
0.17797907780868444	0.20669656794729835
0.17797590996856272	0.2067273079581874
0.17797272594446895	0.20675824018489408
0.17796952570766872	0.20678936528452518
0.1779663092295056	0.20682068391468444
0.17796307648140108	0.20685219673347494
0.1779598274348541	0.20688390439949722
0.17795656206144098	0.2069158075718503
0.17795328033281546	0.20694790691013004
0.1779499822207079	0.20698020307443027
0.1779466676969256	0.2070126967253405
0.17794333673335236	0.20704538852394894
0.1779399893019482	0.20707827913183863
0.17793662537474952	0.2071113692110889
0.1779332449238683	0.2071446594242759
0.17792984792149244	0.20717815043447085
0.17792643433988511	0.20721184290524008
0.17792300415138512	0.2072457375006454
0.17791955732840603	0.20727983488524288
0.17791609384343632	0.20731413572408414
0.17791261366903932	0.2073486406827138
0.1779091167778526	0.20738335042717143
0.17790560314258808	0.20741826562399024
0.17790207273603184	0.20745338694019622
0.1778985255310436	0.20748871504330924
0.17789496150055686	0.2075242506013421
0.1778913806175785	0.20755999428279986
0.17788778285518872	0.20759594675667997
0.1778841681865408	0.20763210869247267
0.17788053658486072	0.2076684807601596
0.17787688802344723	0.20770506363021352
0.1778732224756714	0.20774185797359956
0.17786953991497673	0.20777886446177352
0.17786584031487865	0.2078160837666821
0.17786212364896453	0.2078535165607615
0.17785838989089328	0.20789116351694015
0.17785463901439535	0.20792902530863533
0.1778508709932726	0.20796710260975393
0.1778470858013977	0.20800539609469293
0.17784328341271435	0.20804390643833814
0.17783946380123686	0.20808263431606483
0.17783562694105032	0.2081215804037369
0.1778317728063098	0.20816074537770635
0.1778279013712406	0.20820012991481407
0.17782401261013797	0.2082397346923881
0.1778201064973668	0.2082795603882452
0.17781618300736168	0.20831960768068836
0.17781224211462648	0.2083598772485089
0.17780828379373426	0.20840036977098486
0.17780430801932698	0.20844108592788024
0.1778003147661154	0.20848202639944646
0.17779630400887914	0.2085231918664206
0.17779227572246584	0.20856458301002578
0.17778822988179172	0.20860620051197093
0.17778416646184086	0.20864804505444984
0.17778008543766521	0.20869011732014253
0.1777759867843846	0.20873241799221343
0.17777187047718607	0.20877494775431082
0.17776773649132419	0.2088177072905692
0.17776358480212057	0.2088606972856054
0.1777594153849637	0.20890391842452205
0.17775522821530917	0.20894737139290354
0.17775102326867878	0.20899105687681935
0.177746800520661	0.2090349755628207
0.17774255994691024	0.20907912813794327
0.1777383015231473	0.2091235152897043
0.17773402522515866	0.2091681377061037
0.17772973102879658	0.209212996075624
0.1777254189099788	0.20925809108722948
0.1777210888446884	0.20930342343036618
0.1777167408089736	0.20934899379496108
0.17771237477894772	0.20939480287142387
0.1777079907307888	0.20944085135064316
0.1777035886407395	0.20948713992398926
0.17769916848510697	0.2095336692833139
0.17769473024026283	0.209580440120948
0.17769027388264258	0.20962745312970293
0.1776857993887458	0.2096747090028691
0.1776813067351357	0.2097222084342174
0.1776767958984393	0.20976995211799765
0.17767226685534687	0.20981794074893867
0.1776677195826122	0.20986617502224808
0.17766315405705185	0.2099146556336124
0.17765857025554543	0.20996338327919573
0.1776539681550356	0.2100123586556411
0.17764934773252697	0.21006158246006923
0.1776447089650873	0.21011105539007835
0.1776400518298459	0.21016077814374357
0.17763537630399473	0.2102107514196181
0.1776306823647874	0.21026097591673154
0.1776259699895394	0.2103114523345902
0.17762123915562755	0.21036218137317653
0.1776164898404904	0.21041316373295021
0.17761172202162756	0.21046440011484574
0.17760693567659985	0.2105158912202743
0.1776021307830289	0.21056763775112108
0.17759730731859727	0.21061964040974884
0.177592465261048	0.2106718998989937
0.17758760458818457	0.2107244169221672
0.1775827252778708	0.21077719218305496
0.17757782730803062	0.21083022638591764
0.17757291065664793	0.2108835202354895
0.17756797530176635	0.21093707443697884
0.1775630212214892	0.21099088969606766
0.17755804839397932	0.2110449667189115
0.1775530567974588	0.21109930621213896
0.17754804641020894	0.21115390888285163
0.17754301721056995	0.2112087754386236
0.17753796917694115	0.21126390658750188
0.17753290228778018	0.21131930303800567
0.17752781652160354	0.21137496549912627
0.17752271185698598	0.21143089468032633
0.1775175882725603	0.21148709129154092
0.17751244574701774	0.21154355604317548
0.1775072842591072	0.21160028964610816
0.17750210378763537	0.21165729281168588
0.17749690431146659	0.21171456625172813
0.17749168580952257	0.21177211067852403
0.17748644826078253	0.21182992680483337
0.17748119164428264	0.21188801534388496
0.17747591593911613	0.21194637700937902
0.177470621124433	0.21200501251548387
0.17746530717944017	0.21206392257683815
0.17745997408340092	0.2121231079085491
0.17745462181563484	0.2121825692261931
0.1774492503555181	0.212242307245816
0.1774438596824826	0.21230232268393007
0.1774384497760164	0.2123626162575179
0.1774330206156633	0.2124231886840291
0.17742757218102273	0.2124840406813815
0.17742210445174977	0.21254517296796
0.17741661740755446	0.21260658626261714
0.17741111102820273	0.21266828128467302
0.17740558529351497	0.21273025875391433
0.17740004018336664	0.21279251939059446
0.1773944756776882	0.21285506391543285
0.17738889175646433	0.21291789304961656
0.17738328839973475	0.21298100751479715
0.17737766558759296	0.213044408033093
0.1773720233001871	0.21310809532708785
0.17736636151771906	0.21317207011983103
0.17736068022044474	0.21323633313483648
0.17735497938867395	0.21330088509608414
0.17734925900276993	0.21336572672801746
0.1773435190431495	0.21343085875554563
0.17733775949028285	0.2134962819040419
0.17733198032469322	0.21356199689934274
0.17732618152695717	0.21362800446775
0.17732036307770405	0.2136943053360274
0.17731452495761596	0.21376090023140393
0.1773086671474276	0.21382778988157142
0.1773027896279264	0.21389497501468396
0.177296892379952	0.213962456359359
0.1772909753843963	0.21403023464467735
0.1772850386222033	0.2140983106001808
0.17727908207436893	0.2141666849558741
0.17727310572194094	0.2142353584422244
0.1772671095460189	0.21430433179016045
0.17726109352775382	0.21437360573107206
0.17725505764834798	0.21444318099681042
0.1772490018890553	0.2145130583196893
0.1772429262311806	0.2145832384324814
0.17723683065607967	0.21465372206842187
0.17723071514515937	0.2147245099612048
0.17722457967987712	0.21479560284498667
0.17721842424174103	0.2148670014543823
0.17721224881230974	0.2149387065244669
0.17720605337319223	0.21501071879077627
0.17719983790604762	0.2150830389893042
0.1771936023925851	0.21515566785650575
0.177187346814564	0.2152286061292928
0.17718107115379322	0.21530185454503792
0.17717477539213156	0.21537541384157122
0.17716845951148727	0.21544928475718272
0.177162123493818	0.21552346803061928
0.1771557673211308	0.21559796440108586
0.17714939097548194	0.21567277460824702
0.17714299443897658	0.21574789939222322
0.17713657769376892	0.21582333949359256
0.17713014072206185	0.21589909565339127
0.17712368350610708	0.21597516861311217
0.17711720602820477	0.21605155911470508
0.17711070827070335	0.2161282679005757
0.17710419021599982	0.21620529571358782
0.17709765184653903	0.21628264329706004
0.1770910931448142	0.2163603113947674
0.17708451409336617	0.21643830075094095
0.17707791467478373	0.21651661211026785
0.17707129487170314	0.21659524621788928
0.17706465466680865	0.21667420381940394
0.1770579940428313	0.21675348566086294
0.17705131298254986	0.21683309248877447
0.17704461146879008	0.21691302505010024
0.17703788948442484	0.2169932840922566
0.17703114701237385	0.2170738703631142
0.17702438403560378	0.2171547846109979
0.17701760053712778	0.21723602758468685
0.17701079650000573	0.2173176000334126
0.17700397190734377	0.2173995027068616
0.1769971267422945	0.21748173635517243
0.17699026098805676	0.21756430172893748
0.17698337462787522	0.2176471995792022
0.1769764676450408	0.21773043065746345
0.17696954002289	0.21781399571567273
0.17696259174480522	0.21789789550623162
0.1769556227942144	0.21798213078199502
0.17694863315459092	0.21806670229627
0.1769416228094537	0.2181516108028141
0.17693459174236656	0.21823685705583817
0.1769275399369388	0.2183224418100027
0.17692046737682462	0.21840836582042056
0.17691337404572305	0.2184946298426541
0.17690625992737788	0.2185812346327185
0.1768991250055778	0.21866818094707796
0.17689196926415576	0.21875546954264735
0.17688479268698937	0.21884310117679195
0.1768775952580003	0.21893107660732658
0.17687037696115465	0.21901939659251712
0.1768631377804626	0.21910806189107768
0.17685587769997826	0.21919707326217197
0.1768485967037996	0.21928643146541393
0.1768412947760683	0.2193761372608647
0.1768339719009697	0.21946619140903678
0.17682662806273275	0.2195565946708894
0.17681926324562983	0.2196473478078308
0.17681187743397642	0.21973845158171723
0.1768044706121314	0.21982990675485392
0.17679704276449662	0.21992171408999361
0.17678959387551701	0.2200138743503356
0.17678212392968015	0.220106388299529
0.1767746329115166	0.22019925670166807
0.17676712080559945	0.22029248032129545
0.17675958759654425	0.22038605992340055
0.17675203326900918	0.22047999627341897
0.1767444578076946	0.2205742901372344
0.176736861197343	0.2206689422811754
0.17672924342273905	0.22076395347201694
0.1767216044687095	0.22085932447698087
0.17671394432012272	0.2209550560637349
0.17670626296188924	0.2210511490003909
0.17669856037896076	0.22114760405550826
0.17669083655633105	0.22124442199809002
0.1766830914790349	0.2213416035975858
0.17667532513214879	0.22143914962388844
0.1766675375007902	0.22153706084733704
0.17665972857011786	0.22163533803871527
0.1766518983253314	0.22173398196924898
0.1766440467516716	0.22183299341061224
0.1766361738344199	0.22193237313491854
0.1766282795588984	0.22203212191472887
0.17662036391047004	0.22213224052304636
0.17661242687453804	0.2222327297333171
0.1766044684365461	0.22233359031943167
[truncated: 47,991 more rows]
