# Supplementary material for: Critical Phenomena of Charged AdS Black Holes in Rastall Gravity
Source: Hindawi journal article supplement (doi:10.1155/2020/4065254), 2020-01-24
Supplement: f1 [file 4065254.f1.zip › Fig5(b)-GT3.dat]

-3175.1389721747205	3.002499779863407
-2384.272622609307	2.730022435418574
-1835.4370892000397	2.502999622504664
-1442.7147037482093	2.3109418294462096
-1154.3343810801591	2.1463565475738484
-937.8320702780112	2.0037492702248882
-772.1467823446094	1.878999117118555
-643.208511472725	1.7689548265987098
-541.3740992998518	1.6711654171289099
-459.8839666907671	1.5836959030521245
-393.9043087428549	1.5049982956224768
-339.9162813672081	1.433819460885011
-295.31692955530053	1.3691341072245675
-258.15273452903347	1.3100952544236126
-226.93819019690883	1.2559970854555746
-200.53006186026943	1.2062467138477464
-178.0388161355574	1.1603424662681108
-158.76530356132696	1.1178569912039564
-142.15487455783563	1.0784239872093369
-127.7637096209507	1.0417276770323511
-115.23382449479482	1.007494386916943
-104.27431481684705	0.9754857557172458
-94.64714135589874	0.9454932173029674
-86.15625574874349	0.9173334861637832
-78.63920896001353	0.8908448396717659
-71.96062259428162	0.8658840376702424
-66.00707048195926	0.8423237554644972
-60.68303690068622	0.8200504330842449
-55.907703235247155	0.7989624641362262
-51.61237685584474	0.7789686632948601
-47.73842136457819	0.7599869636692888
-44.23558086157583	0.741943304799627
-41.06061582327788	0.7247706795108841
-38.17618689773892	0.7084083137640067
-35.5499370645982	0.6928009583454066
-33.153733371332024	0.6778982749978827
-30.963037704353948	0.6636543026214143
-28.956382412109654	0.65002699161853
-27.114931529562714	0.6369777964464983
-25.422112201409746	0.6244713180610866
-23.86330391992062	0.6124749892670588
-22.425575573722746	0.6009587970862617
-21.097462190514985	0.5898950371601566
-19.868774759255277	0.5792580959558342
-18.730437719568027	0.5690242571713595
-17.674349672285327	0.5591715292605265
-16.69326364483361	0.5496794914371036
-15.780683877141875	0.540529155889154
-14.9307766079333	0.5317028442470432
-14.138292761211966	0.5231840766140208
-13.398500777001622	0.5149574716937395
-12.707128113579637	0.5070086567412962
-12.060310182202963	0.4993241862286842
-11.454545668908997	0.49189146825639113
-10.886657358805646	0.4846986978639079
-10.353757712295966	0.47773479649618694
-9.853218554711216	0.47098935697314936
-9.382644334734858	0.46445259338729183
-8.93984848593862	0.45811529542209295
-8.522832492286783	0.4519687866427287
-8.129767314691646	0.4460048863618685
-7.758976883340087	0.44021587472807766
-7.408923400969577	0.4345944607235184
-7.078194236716164	0.4291337527919752
-6.7654902195490045	0.4238272318483892
-6.469615165443593	0.41866872644763
-6.189466493991766	0.41365238991362413
-5.9240268086537355	0.4087726792506294
-5.672356330787104	0.4040243356767171
-5.433586091326775	0.39940236663572226
-5.206911795862535	0.3949020291582969
-4.991588289140763	0.39051881445547637
-4.7869245539337815	0.3862484336395442
-4.592279186969406	0.382086804477123
-4.407056301358993	0.37803003908847205
-4.230701810845236	0.37407443251506767
-4.062700056329476	0.37021645208479476
-3.9025707396345535	0.3664527275105708
-3.7498661333993866	0.36278004166406425
-3.6041685394598963	0.35919532197140697
-3.465087971111077	0.35569563238252594
-3.3322600373216056	0.35227816586996846
-3.205344009332073	0.3489402374169332
-3.084021052151533	0.34567927745768573
-2.9679926053091346	0.34249282573667017
-2.856978898848567	0.3393785255554654
-2.7507175919989355	0.3363341183793059
-2.6489625232391583	0.33335743877721885
-2.5514825616137933	0.3304464096719489
-2.458060550173398	0.3275990378777633
-2.3684923333171697	0.3248134099059914
-2.2825858606224765	0.3220876880197362
-2.2001603604667297	0.31942010652066294
-2.1210455773913828	0.3168089682520896
-2.04508106773478	0.3142526413038222
-1.9721155485774984	0.3117495559052843
-1.902006295507627	0.30929820149450654
-1.8346185851299064	0.306897123951471
-1.7698251786170907	0.3045449229851589
-1.7075058429388406	0.3022402496644289
-1.6475469067069999	0.2999818040835754
-1.5898408478497899	0.2977683331540709
-1.5342859105744784	0.2955986285146091
-1.4807857493012662	0.2934715245521169
-1.4292490974529082	0.2913858965269245
-1.3795894591672453	0.2893406587957514
-1.3317248221652656	0.28733476312660683
-1.2855773901573417	0.28536719710010516
-1.2410733333064057	0.2834369825920697
-1.198142555390464	0.281543174332643
-1.1567184764192577	0.27968485853744235
-1.1167378295620891	0.2778611516065904
-1.0781404713369411	0.27607119888772763
-1.0408692040958238	0.2743141734993659
-1.0048696099186296	0.27258927521117504
-0.9700898950983672	0.2708957293780167
-0.9364807444651013	0.26923278592473665
-0.9039951848548433	0.26759971837892027
-0.8725884570835164	0.26599582294898666
-0.8422178958354568	0.2644204176451625
-0.8128428169210533	0.26287284144102485
-0.7844244113995639	0.2613524534734474
-0.7569256461010891	0.25985863227891176
-0.7303111701165607	0.25839077506427044
-0.7045472268565888	0.2569482970101627
-0.6796015713094397	0.2555306306053884
-0.6554433921554572	0.2541372250106481
-0.6320432384201349	0.25276754545014796
-0.6093729503709553	0.25142107262965624
-0.5874055943842332	0.25009730217967957
-0.5661154015276634	0.24879574412250263
-0.5454777096222093	0.24751592236190698
-0.5254689085635671	0.24625737419445023
-0.5060663886987121	0.2450196498412514
-0.4872484920671909	0.2438023119992844
-0.46899446632988673	0.24260493541123881
-0.4512844212200806	0.2414271064530569
-0.4340992873628149	0.2402684227383062
-0.4174207773189391	0.23912849273859027
-0.4012313487198078	0.23800693541924492
-0.38551416936751215	0.2369033798896063
-0.37025308418377423	0.2358174650671755
-0.35543258389829846	0.2347488393550392
-0.34103777537448304	0.23369716033194088
-0.3270543534770045	0.2326620944544263
-0.31346857439192505	0.23164331677051905
-0.3002672303156827	0.23064051064440816
-0.28743762543463514	0.22965336749165716
-0.27496755312176663	0.22868158652446802
-0.2628452742817727	0.2277248745065578
-0.2510594967800216	0.22678294551722714
-0.23959935589488804	0.22585552072422097
-0.22845439573667595	0.22494232816500162
-0.2176145515798239	0.22404310253607318
-0.20707013305832858	0.22315758499001306
-0.19681180817734545	0.22228552293988418
-0.18683058809675554	0.2214266698707165
-0.17711781264512716	0.22058078515776117
-0.16766513652496934	0.21974763389123586
-0.1584645161724835	0.21892698670729163
-0.1495081972371794	0.21811861962494547
-0.14078870264874233	0.21732231388873488
-0.13229882124042908	0.21653785581686022
-0.12403159690004849	0.21576503665459437
-0.11598031822123388	0.21500365243274672
-0.10813850862928068	0.21425350383097966
-0.1004999169572749	0.2135143960457848
-0.09305850844961139	0.21278613866293397
-0.08580845617128423	0.21206854553423013
-0.07874413280253596	0.21136143465838858
-0.07186010279959015	0.2106646280658896
-0.06515111490324665	0.2099779517076469
-0.058612094978128755	0.20930123534734715
-0.05223813916630321	0.20863431245731864
-0.046024507339881816	0.20797702011779567
-0.039966616838043284	0.20732919891944968
-0.034060036474697075	0.2066906928690646
-0.02830048080374485	0.20606134929823847
-0.022683804629593324	0.20544101877499849
-0.017205997751218526	0.20482955501822228
-0.011863179928703171	0.20422681481476096
-0.006651596061744355	0.20363265793916602
-0.0015676115701783594	0.20304694707592424
0.0033922920329171047	0.2024695477441102
0.008231521384495087	0.20190032822436915
0.012953375339679888	0.20133915948814632
0.0175610488728349	0.20078591512908225
0.02205763681920938	0.200240471296498
0.0264461374644286	0.19970270663089573
0.03072945598872596	0.19917250220140348
0.03491040777247179	0.19864974144509695
0.03899172156922674	0.19813431010813223
0.042976042552239406	0.19762609618862698
0.04686593524001539	0.19712498988122978
0.05066388630631055	0.19663088352331975
0.05437230727963756	0.19614367154278045
0.05799353713713058	0.1956632504072951
0.06152984479737557	0.19518951857511133
0.0649834315165946	0.19472237644722612
0.06835643319236002	0.19426172632094288
0.07165092257881839	0.19380747234475634
0.07486891141721064	0.19335952047451888
0.07801235248530139	0.1929177784308489
0.08108314156915633	0.1924821556577373
0.08408311936054763	0.19205256328231576
0.08701407328311381	0.1916289140757467
0.0898777392502566	0.19121112241520016
0.09267580335761816	0.1907991042468816
0.09540990351285197	0.19039277705007712
0.09808163100527768	0.18999205980218423
0.10069253201789023	0.18959687294469538
0.10324410908408256	0.18920713835010552
0.10573782249133576	0.18882277928971403
0.10817509163402717	0.18844372040229224
0.11055729631741212	0.18806988766359087
0.11288577801474292	0.18770120835666015
0.11516184107940211	0.1873376110429577
0.11738675391384298	0.1869790255342204
0.11956175009705294	0.18662538286507602
0.1216880294721793	0.18627661526637243
0.12376675919588526	0.18593265613920285
0.12579907475093718	0.18559344002960507
0.12778608092345778	0.1852589026039155
0.12972885274621898	0.18492898062475754
0.1316284364092893	0.18460361192764543
0.13348585013929415	0.18428273539818574
0.13530208504849378	0.18396629094985803
0.13707810595483366	0.18365421950235827
0.13881485217407194	0.1833464629604878
0.1405132382850432	0.18304296419357266
0.1421741548690731	0.18274366701539685
0.14379846922451678	0.18244851616463564
0.14538702605735218	0.18215745728577346
0.1469406481487225	0.18187043691049307
0.1484601370002848	0.18158740243952257
0.14994627345818543	0.18130830212492638
0.1513998183164518	0.1810330850528286
0.1528215129005551	0.18076170112655554
0.15421207963187067	0.18049410105018635
0.1555722225737319	0.18023023631249976
0.15690262795974477	0.17997005917130635
0.15820396470500708	0.17971352263815465
0.15947688490084494	0.17946058046340202
0.160722024293661	0.1792111871216391
0.16194000274846077	0.1789652977974587
0.16313142469760267	0.17872286837155926
0.16429687957529715	0.17848385540717426
0.16543694223835786	0.17824821613681796
0.1665521733736885	0.17801590844934
0.1676431198929716	0.17778689087727897
0.16871031531500655	0.17756112258450849
0.16975428013612592	0.1773385633541669
0.17077552218910474	0.1771191735768633
0.1717745369909599	0.17690291423915272
0.1727518080800228	0.17668974691227318
0.17370780734265245	0.17647963374113748
0.17464299532994432	0.1762725374335735
0.17555782156477473	0.17606842124980604
0.1764527248395097	0.17586724899217435
0.1773281335046929	0.17566898499507863
0.17818446574901842	0.17547359411515012
0.17902212987087868	0.17528104172163878
0.17984152454177163	0.17509129368701254
0.18064303906183754	0.17490431637776402
0.18142705360778674	0.17472007664541733
0.18219393947347057	0.17453854181773215
0.182944059303339	0.17435967969009816
0.18367776731901703	0.17418345851711622
0.1843954095392269	0.17400984700436126
0.18509732399327297	0.17383881430032186
0.18578384092829836	0.173670329988513
0.1864552830105156	0.1735043640797569
0.1871119655206062	0.17334088700462796
0.1877541965434766	0.17317986960605816
0.18838227715255185	0.17302128313209839
0.18899650158878195	0.17286509922883203
0.18959715743452887	0.17271128993343754
0.19018452578249762	0.17255982766739578
0.1907588813998678	0.17241068522983857
0.1913204928877773	0.17226383579103588
0.1918696228363045	0.17211925288601726
0.1924065279750901	0.17197691040832475
0.19293145931973466	0.17183678260389465
0.19344466231410334	0.17169884406506356
0.1939463769686658	0.17156306972469787
0.1944368379949927	0.17142943485044163
0.19491627493652836	0.17129791503908143
0.19538491229575378	0.1711684862110251
0.19584296965785009	0.17104112460489146
0.1962906618109706	0.17091580677220852
0.19672819886322382	0.17079250957221775
0.19715578635646677	0.17067121016678197
0.19757362537700718	0.1705518860153941
0.19798191266330528	0.17043451487028508
0.19838084071076717	0.170319074771628
0.1987705978737168	0.1702055440428366
0.19915136846462944	0.17009390128595617
0.19952333285071053	0.1699841253771441
0.19988666754789652	0.16987619546223862
0.20024154531235544	0.16977009095241374
0.20058813522956093	0.16966579151991784
0.20092660280101	0.1695632770938948
0.20125711002865504	0.16946252785628527
0.20157981549711623	0.1693635242378066
0.201894874453739	0.16926624691400932
0.20220243888655953	0.16917067680140904
0.2025026576002386	0.16907679505369144
0.20279567629002304	0.16898458305798922
0.2030816376137904	0.16889402243122933
0.20336068126223372	0.16880509501654872
0.20363294402723803	0.1687177828797771
0.20389855986850094	0.16863206830598607
0.20415765997844726	0.16854793379610175
0.20441037284548633	0.16846536206358068
0.20465682431565796	0.1683843360311473
0.204897137652714	0.16830483882759129
0.20513143359667807	0.16822685378462449
0.2053598304209272	0.16815036443379444
0.2055824439878362	0.16807535450345554
0.20579938780302495	0.16800180791579422
0.20601077306824758	0.16792970878390934
0.206216708732961	0.1678590414089444
0.20641730154460974	0.1677897902772724
0.206612656097662	0.16772194005773075
0.20680287488143131	0.16765547559890642
0.20698805832671754	0.16759038192646922
0.20716830485129917	0.16752664424055264
0.20734371090430825	0.16746424791318187
0.2075143710095181	0.16740317848574687
0.20768037780757415	0.16734342166652016
0.20784182209719543	0.16728496332821885
0.20799879287537498	0.1672277895056091
0.2081513773766062	0.1671718863931526
0.20829966111116122	0.16711724034269462
0.20844372790244625	0.1670638378611917
0.208583659923459	0.16701166560847938
0.20871953773237195	0.16696071039507848
0.20885144030726432	0.1669109591800389
0.20897944508002597	0.16686239906882133
0.2091036279694542	0.16681501731121448
0.2092240634135654	0.16676880129928873
0.20934082440114168	0.1667237385653843
0.2094539825025332	0.1666798167801337
0.20956360789973444	0.1666370237505181
0.20966976941575433	0.16659534741795615
0.20977253454329864	0.16655477585642559
0.2098719694727813	0.16651529727061593
0.20996813911968354	0.1664768999941127
0.21006110715127618	0.16643957248761157
0.21015093601272244	0.16640330333716297
0.2102376869525771	0.16636808125244512
0.21032142004769633	0.16633389506506646
0.21040219422757506	0.1663007337268957
0.21048006729812455	0.1662685863084198
0.2105550959649059	0.16623744199712878
0.21062733585583215	0.16620729009592713
0.21069684154335333	0.16617812002157117
0.21076366656613615	0.166149921303132
0.2108278634502529	0.1661226835804835
0.2108894837298901	0.16609639660281492
0.2109485779675899	0.1660710502271675
0.21100519577403512	0.16604663441699455
0.21105938582739062	0.16602313924074527
0.2111111958922102	0.1660005548704707
0.21116067283792128	0.1659788715804525
0.21120786265689684	0.1659580797458533
0.21125281048212532	0.16593816984138887
0.21129556060448823	0.16591913244002104
0.2113361564896546	0.16590095821167183
0.21137464079460255	0.1658836379219573
0.2114110553837762	0.16586716243094204
0.2114454413448872	0.1658515226919127
0.21147783900436978	0.16583670975017104
0.2115082879424965	0.16582271474184593
0.21153682700816492	0.16580952889272357
0.21156349433336089	0.16579714351709623
0.21158832734730793	0.16578555001662879
0.21161136279030932	0.16577473987924277
0.2116326367272906	0.16576470467801754
0.2116521845610494	0.1657554360701088
0.21167004104521964	0.16574692579568312
0.21168624029695732	0.16573916567686928
0.21170081580935374	0.16573214761672542
0.21171380046358276	0.1657258635982221
0.2117252265407893	0.16572030568324062
0.2117351257337236	0.1657154660115866
0.21174352915812847	0.1657113368000187
0.21175046736388498	0.16570791034129165
0.2117559703459217	0.165705179003214
0.2117600675548938	0.16570313522771973
0.21176278790763683	0.1657017715299541
0.21176415979740057	0.1657010804973729
0.21176421110386787	0.1657010547888551
0.21176296920296417	0.16570168713382905
0.21176046097646106	0.16570297033141113
0.2117567128213803	0.1657048972495576
0.2117517506592017	0.16570746082422863
0.21174559994487985	0.1657106540585649
0.21173828567567377	0.16571447002207604
0.21172983239979426	0.16571890184984123
0.2117202642248724	0.16572394274172117
0.21170960482625362	0.1657295859615818
0.21169787745512175	0.16573582483652924
0.21168510494645587	0.16574265275615577
0.21167130972682435	0.16575006317179666
0.21165651382201983	0.16575804959579796
0.2116407388645388	0.16576660560079462
0.21162400610090804	0.16577572481899905
0.21160633639886345	0.16578540094149988
0.2115877502543827	0.16579562771757073
0.21156826779857568	0.1658063989539889
0.21154790880443636	0.16581770851436373
0.21152669269345797	0.16582955031847418
0.21150463854211565	0.16584191834161663
0.21148176508821911	0.16585480661396082
0.2114580907371376	0.16586820921991557
0.2114336335679009	0.16588212029750338
0.21140841133917884	0.16589653403774343
0.21138244149514074	0.16591144468404362
0.21135574117119998	0.16592684653160075
0.21132832719964323	0.16594273392680936
0.21130021611514932	0.16595910126667865
0.21127142416019826	0.1659759429982574
0.21124196729037448	0.16599325361806694
0.21121186117956506	0.166011027671542
0.211181121225056	0.16602925975247904
0.21114976255252899	0.16604794450249255
0.2111178000209598	0.1660670766104783
0.21108524822742153	0.16608665081208424
0.21105212151179417	0.16610666188918877
0.21101843396138203	0.16612710466938566
0.21098419941544225	0.16614797402547618
0.210949431469625	0.1661692648749683
0.21091414348032808	0.1661909721795825
0.21087834856896712	0.16621309094476414
0.21084205962616395	0.16623561621920233
0.21080528931585374	0.16625854309435578
0.21076805007931396	0.16628186670398443
0.2107303541391155	0.1663055822236874
0.21069221350299855	0.16632968487044755
0.21065363996767433	0.1663541699021817
0.2106146451225544	0.16637903261729667
0.21057524035340885	0.16640426835425173
0.210535436845955	0.16642987249112656
0.21049524558937843	0.1664558404451946
0.2104546773797866	0.1664821676725026
0.210413742823598	0.16650884966745533
0.21037245234086682	0.1665358819624056
0.21033081616854515	0.16656326012725003
0.21028884436368409	0.16659097976903
0.21024654680657434	0.16661903653153734
0.2102039332038285	0.16664742609492578
0.2101610130914051	0.16667614417532692
0.21011779583757673	0.1667051865244716
0.2100742906458425	0.16673454892931586
0.2100305065577865	0.16676422721167164
0.20998645245588304	0.16679421722784255
0.20994213706624992	0.16682451486826402
0.2098975689613508	0.16685511605714834
0.20985275656264746	0.16688601675213377
0.2098077081432033	0.1669172129439386
0.20976243183023877	0.16694870065601936
0.20971693560763977	0.16698047594423335
0.2096712273184203	0.16701253489650564
0.20962531466713946	0.16704487363249987
0.2095792052222747	0.1670774883032936
0.20953290641855138	0.16711037509105778
0.20948642555923008	0.16714353020873968
0.2094397698183521	0.1671769498997504
0.20939294624294424	0.16721063043765602
0.20934596175518347	0.1672445681258725
0.20929882315452228	0.1672787592973648
0.20925153711977595	0.16731320031434893
0.20920411021117158	0.16734788756799876
0.20915654887236085	0.16738281747815545
0.20910885943239554	0.1674179864930411
0.20906104810766868	0.16745339108897567
0.20901312100381997	0.16748902777009744
0.20896508411760745	0.16752489306808688
0.20891694333874547	0.16756098354189397
0.20886870445171019	0.16759729577746865
0.2088203731375124	0.16763382638749472
0.20877195497543893	0.1676705720111271
0.20872345544476328	0.16770752931373176
0.20867487992642553	0.16774469498662964
0.2086262337046828	0.16778206574684268
0.20857752196873022	0.16781963833684377
0.2085287498142933	0.16785740952430916
0.20847992224519227	0.16789537610187416
0.2084310441748788	0.1679335348868914
0.20838212042794568	0.1679718827211925
0.20833315574160982	0.1680104164708522
0.2082841547671695	0.16804913302595526
0.20823512207143582	0.1680880293003664
0.20818606213813923	0.1681271022315029
0.20813697936931144	0.1681663487801097
0.20808787808664325	0.16820576593003725
0.20803876253281875	0.16824535068802224
0.20798963687282607	0.16828510008347053
0.20794050519524565	0.16832501116824267
0.20789137151351617	0.16836508101644232
0.207842239767178	0.16840530672420667
0.20779311382309604	0.16844568540949947
0.2077439974766607	0.16848621421190685
0.20769489445296824	0.16852689029243467
0.20764580840798116	0.16856771083330913
0.20759674292966832	0.16860867303777913
0.20754770153912544	0.16864977412992102
0.20749868769167656	0.16869101135444578
0.2074497047779565	0.16873238197650814
0.2074007561249747	0.16877388328151816
0.2073518449971612	0.16881551257495478
0.20730297459739438	0.1688572671821817
0.20725414806801143	0.168899144448265
0.20720536849180152	0.1689411417377934
0.20715663889298205	0.1689832564346999
0.20710796223815855	0.16902548594208616
0.20705934143726787	0.16906782768204814
0.20701077934450593	0.1691102790955043
0.20696227875923925	0.16915283764202546
0.2069138424269015	0.1691955007996666
0.20686547303987474	0.16923826606480064
0.2068171732383556	0.16928113095195396
0.20676894561120762	0.16932409299364382
0.20672079269679805	0.16936714974021772
0.2066727169838219	0.1694102987596944
0.20662472091211131	0.16945353763760648
0.2065768068734317	0.16949686397684532
0.20652897721226435	0.16954027539750707
0.20648123422657644	0.1695837695367407
0.2064335801685777	0.1696273440485978
0.20638601724546451	0.1696709966038838
0.20633854762015197	0.16971472489001085
0.20629117341199354	0.1697585266108526
0.2062438966974887	0.16980239948660025
0.2061967195109789	0.16984634125362033
0.20614964384533216	0.16989034966431396
0.2061026716526162	0.16993442248697782
0.2060558048447603	0.16997855750566637
0.20600904529420638	0.17002275252005578
0.20596239483454967	0.17006700534530925
0.2059158552611681	0.17011131381194372
0.20586942833184188	0.1701556757656983
0.2058231157673628	0.17020008906740358
0.2057769192521336	0.17024455159285318
0.20573084043475703	0.1702890612326757
0.205684880928616	0.17033361589220872
0.20563904231244376	0.17037821349137416
0.20559332613088455	0.1704228519645544
0.20554773389504605	0.17046752926047035
0.20550226708304142	0.17051224334206058
0.20545692714052394	0.1705569921863615
0.205411715481212	0.17060177378438932
0.20536663348740564	0.17064658614102274
0.20532168251049526	0.17069142727488715
0.20527686387146157	0.17073629521824013
0.20523217886136744	0.17078118801685802
0.20518762874184207	0.1708261037299235
0.2051432147455573	0.17087104042991486
0.20509893807669585	0.17091599620249587
0.20505479991141257	0.1709609691464072
0.20501080139828762	0.17100595737335883
0.2049669436587729	0.1710509590079234
0.20492322778763108	0.17109597218743106
0.2048796548533675	0.17114099506186523
0.20483622589865522	0.17118602579375913
0.2047929419407532	0.17123106255809398
0.20474980397191783	0.17127610354219772
0.20470681295980786	0.1713211469456451
0.20466396984788288	0.17136619098015862
0.20462127555579543	0.17141123386951068
0.20457873097977652	0.1714562738494264
0.2045363369930157	0.17150130916748785
0.20449409444603434	0.17154633808303887
0.20445200416705345	0.1715913588670913
0.20441006696235536	0.1716363698022315
0.2043682836166401	0.1716813691825287
0.20432665489337526	0.17172635531344344
0.2042851815351412	0.17177132651173754
0.20424386426397043	0.17181628110538455
0.20420270378168134	0.1718612174334815
0.20416170077020734	0.1719061338461612
0.20412085589191975	0.17195102870450557
0.20408016978994686	0.1719959003804599
0.20403964308848688	0.1720407472567479
0.2039992763931164	0.17208556772678746
0.20395907029109406	0.1721303601946076
0.2039190253516594	0.17217512307476587
0.2038791421263268	0.17221985479226692
0.20383942114917497	0.1722645537824815
0.2037998629371318	0.17230921849106656
0.203760467990255	0.1723538473738861
0.203721236792008	0.17239843889693268
0.20368216980953163	0.17244299153624976
0.20364326749391154	0.17248750377785493
0.20360453028044176	0.17253197411766363
0.20356595858888343	0.17257640106141395
0.2035275528237203	0.17262078312459173
0.20348931337440934	0.17266511883235697
0.2034512406156288	0.1727094067194704
0.2034133349075204	0.17275364533022122
0.20337559659592996	0.17279783321835504
0.20333802601264253	0.17284196894700307
0.20330062347561484	0.17288605108861166
0.20326338928920368	0.17293007822487258
0.2032263237443912	0.17297404894665405
0.20318942711900578	0.1730179618539322
0.20315269967794092	0.1730618155557237
0.2031161416733693	0.17310560867001842
0.20307975334495426	0.1731493398237132
0.203043534920058	0.17319300765254586
0.20300748661394627	0.1732366108010304
0.20297160862999028	0.1732801479223922
0.20293590115986504	0.1733236176785043
0.20290036438374492	0.17336701873982396
0.2028649984704961	0.17341034978533004
0.20282980357786623	0.173453609502461
0.20279477985267097	0.1734967965870532
0.20275992743097726	0.17353990974328015
0.20272524643828502	0.17358294768359206
0.20269073698970447	0.17362590912865608
0.2026563991901319	0.17366879280729722
0.20262223313442218	0.17371159745643935
0.20258823890755878	0.17375432182104752
0.2025544165848211	0.17379696465407007
0.20252076623194948	0.17383952471638175
0.20248728790530712	0.17388200077672725
0.20245398165204026	0.173924391611665
0.20242084751023529	0.1739666960055121
0.20238788550907366	0.17400891275028912
0.20235509566898452	0.1740510406456657
0.20232247800179504	0.17409307849890682
0.20229003251087802	0.17413502512481902
0.20225775919129782	0.17417687934569792
0.20222565802995363	0.17421863999127532
0.20219372900572086	0.17426030589866778
0.20216197208958991	0.1743018759123246
0.20213038724480353	0.17434334888397718
0.20209897442699143	0.17438472367258825
0.20206773358430283	0.174425999144302
0.2020366646575378	0.17446717417239435
0.2020057675802756	0.17450824763722378
0.20197504227900165	0.17454921842618254
0.20194448867323234	0.1745900854336485
0.20191410667563808	0.17463084756093739
0.20188389619216432	0.17467150371625512
0.20185385712215084	0.1747120528146509
0.2018239893584492	0.17475249377797086
0.2017942927875383	0.17479282553481176
0.20176476728963846	0.17483304702047522
0.2017354127388234	0.17487315717692256
0.20170622900313068	0.17491315495272972
0.2016772159446706	0.17495303930304304
0.20164837341973324	0.17499280918953475
0.20161970127889395	0.17503246358035965
0.20159119936711725	0.17507200145011154
0.201562867523859	0.17511142177978045
0.20153470558316755	0.1751507235567099
0.20150671337378237	0.17518990577455484
0.20147889071923225	0.17522896743323998
0.2014512374379313	0.17526790753891797
0.20142375334327378	0.17530672510392883
0.20139643824372744	0.1753454191467588
0.2013692919429254	0.1753839886920002
0.20134231423975663	0.1754224327703115
0.20131550492845512	0.1754607504183775
0.20128886379868782	0.17549894067887023
0.20126239063564083	0.17553700260040975
0.20123608522010475	0.17557493523752582
0.20120994732855846	0.1756127376506194
0.2011839767332516	0.17565040890592487
0.20115817320228618	0.17568794807547228
0.20113253649969637	0.17572535423705007
0.20110706638552753	0.17576262647416835
0.20108176261591387	0.17579976387602184
0.20105662494315496	0.17583676553745392
0.20103165311579108	0.17587363055892047
0.20100684687867734	0.17591035804645405
0.20098220597305683	0.1759469471116287
0.20095773013663262	0.17598339687152478
0.2009334191036385	0.17601970644869405
0.20090927260490898	0.17605587497112546
0.20088529036794767	0.17609190157221058
0.2008614721169954	0.17612778539070995
0.2008378175730966	0.17616352557071954
0.2008143264541652	0.17619912126163703
0.20079099847504878	0.17623457161812917
0.20076783334759296	0.17626987580009876
0.20074483078070338	0.17630503297265226
0.2007219904804081	0.1763400423060676
0.20069931214991785	0.17637490297576203
0.20067679548968642	0.17640961416226073
0.2006544401974692	0.17644417505116522
0.20063224596838158	0.17647858483312218
0.20061021249495592	0.17651284270379278
0.200588339467198	0.17654694786382175
0.20056662657264254	0.17658089951880726
0.20054507349640763	0.17661469687927067
0.20052367992124864	0.17664833916062678
0.20050244552761126	0.17668182558315398
0.20048136999368354	0.1767151553719652
0.2004604529954472	0.1767483277569784
0.2004396942067284	0.1767813419728882
0.20041909329924756	0.17681419725913655
0.20039864994266807	0.176846892859885
0.20037836380464494	0.1768794280239861
0.20035823455087226	0.1769118020049555
0.20033826184512998	0.17694401406094445
0.20031844534933013	0.17697606345471206
0.200298784723562	0.1770079494535982
0.20027927962613717	0.17703967132949644
0.20025992971363335	0.17707122835882705
0.20024073464093767	0.17710261982251074
0.2002216940612896	0.17713384500594187
0.2002028076263227	0.17716490319896278
0.20018407498610627	0.17719579369583727
0.20016549578918597	0.17722651579522533
0.20014706968262383	0.17725706880015732
0.200128796312038	0.17728745201800877
0.2001106753216415	0.1773176647604752
0.20009270635428056	0.17734770634354724
0.20007488905147214	0.17737757608748586
0.2000572230534415	0.17740727331679793
0.20003970799915824	0.17743679736021176
0.20002234352637258	0.1774661475506531
0.20000512927165076	0.17749532322522107
0.19998806487040977	0.17752432372516458
0.19997114995695192	0.1775531483958587
0.19995438416449846	0.1775817965867812
0.19993776712522293	0.17761026765148952
0.19992129847028386	0.1776385609475976
0.1999049778298571	0.17766667583675327
0.19988880483316762	0.17769461168461542
0.19987277910852055	0.17772236786083168
0.1998569002833322	0.17774994373901612
0.19984116798416013	0.17777733869672702
0.1998255818367331	0.17780455211544505
0.19981014146598047	0.17783158338055163
0.1997948464960608	0.1778584318813071
0.19977969655039057	0.1778850970108295
0.19976469125167218	0.17791157816607311
0.1997498302219212	0.1779378747478077
0.19973511308249373	0.17796398616059717
0.19972053945411306	0.1779899118127793
0.19970610895689583	0.1780156511164447
0.199691821210378	0.17804120348741673
0.19967767583354024	0.17806656834523088
0.1996636724448328	0.17809174511311499
0.19964981066220053	0.17811673321796917
0.19963609010310668	0.17814153209034583
0.19962251038455714	0.17816614116443025
0.1996090711231236	0.17819055987802093
0.19959577193496703	0.1782147876725104
0.19958261243585995	0.1782388239928658
0.1995695922412093	0.17826266828761012
0.19955671096607794	0.1782863200088028
0.19954396822520676	0.17830977861202155
0.1995313636330358	0.17833304355634338
0.19951889680372514	0.1783561143043261
0.19950656735117567	0.17837899032199014
0.19949437488904928	0.17840167107880037
0.1994823190307889	0.17842415604764778
0.19947039938963818	0.17844644470483179
0.19945861557866065	0.17846853653004252
0.19944696721075894	0.17849043100634282
0.19943545389869333	0.17851212762015112
0.19942407525510014	0.17853362586122368
0.1994128308925099	0.17855492522263777
0.1994017204233652	0.17857602520077404
0.199390743460038	0.17859692529529994
0.19937989961484703	0.17861762500915263
0.19936918850007457	0.17863812384852226
0.1993586097279833	0.1786584213228354
0.19934816291083246	0.17867851694473866
0.19933784766089407	0.17869841023008184
0.19932766359046877	0.1787181006979024
0.19931761031190132	0.1787375878704087
0.19930768743759603	0.17875687127296438
0.1992978945800316	0.1787759504340722
0.19928823135177626	0.17879482488535858
0.1992786973655019	0.1788134941615576
0.1992692922339988	0.17883195780049568
0.1992600155701893	0.1788502153430761
0.199250866987142	0.17886826633326364
0.19924184609808504	0.1788861103180695
0.19923295251641956	0.17890374684753607
0.19922418585573298	0.17892117547472203
0.19921554572981165	0.17893839575568748
0.1992070317526538	0.17895540724947911
0.1991986435384817	0.1789722095181157
0.19919038070175416	0.1789888021265734
0.19918224285717845	0.17900518464277143
0.19917422961972214	0.17902135663755764
0.1991663406046247	0.17903731768469439
0.1991585754274091	0.17905306736084425
0.19915093370389264	0.17906860524555618
0.19914341505019845	0.17908393092125158
0.19913601908276576	0.17909904397321025
0.1991287454183611	0.17911394398955688
0.19912159367408827	0.1791286305612474
0.19911456346739903	0.17914310328205535
0.19910765441610268	0.17915736174855867
0.19910086613837638	0.17917140556012606
0.19909419825277463	0.17918523431890393
0.1990876503782389	0.17919884762980332
0.19908122213410684	0.1792122451004867
0.19907491314012177	0.17922542634135497
0.19906872301644146	0.179238390965535
0.19906265138364698	0.17925113858886627
0.19905669786275149	0.17926366882988862
0.19905086207520878	0.17927598130982947
0.19904514364292153	0.17928807565259142
0.19903954218824982	0.17929995148473976
0.1990340573340187	0.17931160843549016
0.19902868870352658	0.17932304613669647
0.1990234359205526	0.1793342642228385
0.19901829860936462	0.17934526233101006
0.19901327639472638	0.17935604010090683
0.199008368901905	0.1793665971748146
0.199003575756678	0.17937693319759734
0.1989988965853406	0.17938704781668563
0.19899433101471234	0.17939694068206477
0.19898987867214402	0.17940661144626346
0.19898553918552428	0.17941605976434216
0.19898131218328613	0.1794252852938817
0.19897719729441332	0.17943428769497194
0.19897319414844664	0.17944306663020065
0.19896930237548982	0.17945162176464222
0.19896552160621583	0.1794599527658465
0.19896185147187262	0.17946805930382795
0.19895829160428868	0.17947594105105452
0.19895484163587915	0.1794835976824369
0.19895150119965088	0.17949102887531787
0.19894826992920805	0.17949823430946113
0.19894514745875738	0.1795052136670412
0.19894213342311337	0.1795119666326324
0.19893922745770337	0.17951849289319863
0.19893642919857257	0.17952479213808287
0.1989337382823887	0.17953086405899668
0.19893115434644687	0.17953670835001018
0.19892867702867426	0.17954232470754167
0.19892630596763466	0.17954771283034743
0.1989240408025328	0.17955287241951173
0.1989218811732188	0.17955780317843695
0.19891982672019237	0.1795625048128333
0.1989178770846069	0.17956697703070928
0.19891603190827364	0.1795712195423617
0.19891429083366552	0.1795752320603659
0.19891265350392112	0.17957901429956635
0.1989111195628484	0.17958256597706657
0.19890968865492842	0.17958588681222007
0.19890836042531873	0.1795889765266205
0.19890713451985725	0.17959183484409263
0.19890601058506535	0.17959446149068237
0.1989049882681514	0.17959685619464813
0.19890406721701398	0.17959901868645126
0.19890324708024487	0.17960094869874682
0.1989025275071325	0.17960264596637482
0.19890190814766456	0.17960411022635062
0.19890138865253126	0.17960534121785654
0.19890096867312798	0.17960633868223247
0.1989006478615582	0.17960710236296729
0.19890042587063608	0.1796076320056899
0.19890030235388906	0.17960792735816045
0.19890027696556073	0.17960798817026186
0.1989003493606128	0.1796078141939908
0.19890051919472798	0.17960740518344961
0.19890078612431214	0.17960676089483743
0.19890114980649654	0.17960588108644154
0.19890160989914013	0.1796047655186297
0.1989021660608316	0.17960341395384086
0.19890281795089157	0.17960182615657752
0.19890356522937455	0.17960000189339723
0.1989044075570709	0.17959794093290443
0.19890534459550868	0.17959564304574227
0.19890637600695546	0.17959310800458456
0.19890750145442024	0.17959033558412774
0.19890872060165493	0.17958732556108292
0.19891003311315614	0.1795840777141678
0.19891143865416688	0.1795805918240989
0.19891293689067777	0.17957686767358394
0.19891452748942873	0.17957290504731357
0.19891621011791039	0.179568703731954
0.19891798444436548	0.17956426351613927
0.19891985013778996	0.17955958419046353
0.19892180686793456	0.17955466554747357
0.19892385430530576	0.17954950738166106
0.19892599212116702	0.17954410948945543
0.1989282199875399	0.179538471669216
0.19893053757720508	0.17953259372122504
0.19893294456370336	0.17952647544768002
0.19893544062133678	0.17952011665268652
0.19893802542516925	0.17951351714225103
0.1989406986510276	0.17950667672427356
0.19894345997550236	0.17949959520854075
0.1989463090759485	0.17949227240671828
0.19894924563048622	0.1794847081323443
0.1989522693180017	0.17947690220082232
0.19895537981814737	0.17946885442941396
0.19895857681134302	0.1794605646372322
0.19896185997877602	0.1794520326452344
0.19896522900240193	0.17944325827621566
0.1989686835649449	0.17943424135480174
0.1989722233498984	0.17942498170744248
0.19897584804152516	0.17941547916240502
0.1989795573248578	0.17940573354976702
0.1989833508856992	0.1793957447014103
0.19898722841062264	0.17938551245101383
0.19899118958697207	0.17937503663404758
0.1989952341028623	0.17936431708776573
0.19899936164717932	0.17935335365120036
0.19900357190958023	0.1793421461651549
0.19900786458049352	0.1793306944721978
0.199012239351119	0.17931899841665605
0.1990166959134279	0.17930705784460915
0.19902123396016283	0.17929487260388258
0.1990258531848379	0.17928244254404155
0.1990305532817384	0.17926976751638496
0.199035333945921	0.17925684737393915
0.19904019487321326	0.17924368197145174
0.19904513576021393	0.17923027116538554
0.19905015630429232	0.17921661481391274
0.1990552562035885	0.17920271277690844
0.19906043515701266	0.17918856491594515
0.1990656928642451	0.1791741710942864
0.19907102902573587	0.17915953117688138
0.1990764433427044	0.17914464503035843
0.19908193551713918	0.17912951252301967
0.19908750525179744	0.17911413352483518
0.19909315225020463	0.17909850790743703
0.19909887621665398	0.17908263554411344
0.19910467685620623	0.17906651630980364
0.19911055387468896	0.17905015008109165
0.19911650697869604	0.17903353673620093
0.19912253587558748	0.1790166761549887
0.1991286402734883	0.17899956821894047
0.19913481988128848	0.17898221281116428
0.19914107440864195	0.17896460981638562
0.19914740356596633	0.17894675912094166
0.1991538070644419	0.17892866061277563
0.19916028461601148	0.17891031418143213
0.19916683593337906	0.178891719718051
0.19917346073000958	0.17887287711536237
0.1991801587201281	0.1788537862676815
0.19918692961871895	0.17883444707090324
0.1991937731415251	0.17881485942249667
0.19920068900504723	0.17879502322150034
0.19920767692654306	0.17877493836851682
0.1992147366240264	0.17875460476570754
0.19922186781626638	0.17873402231678776
0.19922907022278663	0.17871319092702143
0.19923634356386422	0.17869211050321632
0.1992436875605291	0.17867078095371863
0.19925110193456277	0.17864920218840835
0.19925858640849767	0.17862737411869398
0.19926614070561605	0.17860529665750802
0.19927376454994916	0.17858296971930165
0.1992814576662761	0.17856039322004008
0.19928921978012304	0.17853756707719756
0.19929705061776193	0.1785144912097527
0.19930494990620973	0.17849116553818356
0.19931291737322726	0.17846758998446294
0.1993209527473182	0.1784437644720536
0.1993290557577278	0.17841968892590374
0.1993372261344422	0.17839536327244185
0.19934546360818703	0.17837078743957274
0.1993537679104264	0.1783459613566722
0.19936213877336167	0.17832088495458287
0.19937057592993052	0.17829555816560955
0.1993790791138057	0.17826998092351462
0.19938764805939374	0.17824415316351336
0.1993962825018341	0.17821807482226965
0.19940498217699765	0.17819174583789169
0.1994137468214856	0.17816516614992703
0.1994225761726284	0.17813833569935858
0.19943146996848435	0.17811125442859987
0.19944042794783856	0.17808392228149122
0.19944944985020155	0.17805633920329472
0.19945853541580805	0.1780285051406903
0.19946768438561568	0.1780004200417715
0.19947689650130396	0.17797208385604102
0.19948617150527256	0.17794349653440625
0.19949550914064051	0.1779146580291758
0.19950490915124452	0.17788556829405422
0.19951437128163793	0.1778562272841389
0.19952389527708914	0.17782663495591508
0.19953348088358053	0.1777967912672523
0.19954312784780698	0.17776669617739996
0.19955283591717463	0.1777363496469831
0.19956260483979948	0.177705751637999
0.19957243436450595	0.17767490211381232
0.19958232424082567	0.17764380103915162
0.19959227421899597	0.1776124483801052
0.1996022840499586	0.17758084410411712
0.19961235348535833	0.17754898817998332
0.19962248227754142	0.17751688057784756
0.19963267017955444	0.17748452126919753
0.19964291694514275	0.17745191022686124
0.19965322232874894	0.17741904742500264
0.1996635860855117	0.17738593283911844
0.19967400797126422	0.17735256644603367
0.19968448774253275	0.17731894822389804
0.1996950251565352	0.17728507815218253
0.19970561997117967	0.17725095621167522
0.19971627194506308	0.17721658238447768
0.19972698083746954	0.1771819566540014
0.1997377464083691	0.17714707900496363
0.1997485684184162	0.17711194942338435
0.19975944662894804	0.17707656789658208
0.1997703808019834	0.17704093441317056
0.19978137070022092	0.1770050489630552
0.19979241608703766	0.17696891153742877
0.19980351672648777	0.17693252212876895
0.1998146723833008	0.17689588073083373
0.19982588282288022	0.17685898733865868
0.19983714781130207	0.1768218419485528
0.1998484671153133	0.17678444455809542
0.19985984050233033	0.1767467951661325
0.19987126774043756	0.17670889377277338
0.19988274859838567	0.17667074037938693
0.19989428284559044	0.17663233498859887
0.19990587025213086	0.17659367760428743
0.19991751058874785	0.17655476823158064
0.19992920362684263	0.1765156068768526
0.1999409491384752	0.17647619354772057
0.19995274689636283	0.17643652825304096
0.19996459667387845	0.17639661100290657
0.19997649824504923	0.17635644180864304
0.19998845138455495	0.1763160206828057
0.20000045586772633	0.17627534763917618
0.20001251147054377	0.17623442269275913
0.20002461796963567	0.17619324585977916
0.20003677514227666	0.17615181715767764
0.2000489827663865	0.17611013660510924
0.20006124062052794	0.17606820422193883
0.2000735484839058	0.1760260200292385
0.20008590613636484	0.17598358404928457
0.20009831335838862	0.17594089630555373
0.20011076993109772	0.1758979568227207
0.2001232756362481	0.1758547656266546
0.2001358302562298	0.1758113227444165
0.20014843357406514	0.17576762820425532
0.20016108537340727	0.17572368203560612
0.20017378543853853	0.1756794842690858
0.200186533554369	0.1756350349364908
0.2001993295064347	0.1755903340707942
0.20021217308089628	0.17554538170614203
0.20022506406453722	0.175500177877851
0.20023800224476246	0.17545472262240533
0.20025098740959663	0.17540901597745348
0.20026401934768262	0.17536305798180593
0.20027709784828002	0.17531684867543149
0.20029022270126334	0.17527038809945494
0.20030339369712064	0.17522367629615385
0.20031661062695183	0.17517671330895582
0.20032987328246726	0.17512949918243606
0.20034318145598595	0.17508203396231345
0.20035653494043404	0.17503431769544897
0.20036993352934337	0.17498635042984212
0.20038337701684977	0.17493813221462826
0.20039686519769145	0.17488966310007617
0.20041039786720755	0.17484094313758472
0.2004239748213364	0.17479197237968055
0.20043759585661425	0.1747427508800154
0.2004512607701733	0.1746932786933628
0.20046496935974029	0.17464355587561609
0.20047872142363507	0.1745935824837853
0.2004925167607689	0.17454335857599448
0.2005063551706428	0.17449288421147932
0.2005202364533461	0.17444215945058403
0.20053416040955485	0.1743911843547591
0.2005481268405301	0.17433995898655844
0.20056213554811675	0.1742884834096371
0.20057618633474128	0.17423675768874813
0.20059027900341095	0.17418478188974046
0.20060441335771162	0.17413255607955597
0.20061858920180664	0.1740800803262275
0.200632806340435	0.17402735469887545
0.2006470645789098	0.1739743792677059
0.20066136372311677	0.173921154104008
0.20067570357951267	0.17386767928015112
0.20069008395512383	0.17381395486958268
0.2007045046575443	0.17375998094682565
0.20071896549493468	0.17370575758747592
0.20073346627602046	0.1736512848681998
0.20074800681008997	0.17359656286673172
0.20076258690699375	0.17354159166187183
0.20077720637714208	0.17348637133348344
0.20079186503150412	0.1734309019624906
0.20080656268160596	0.1733751836308759
0.20082129913952923	0.17331921642167755
0.2008360742179095	0.173263000418988
0.2008508877299348	0.17320653570795014
0.20086573948934403	0.17314982237475665
0.20088062931042538	0.17309286050664624
0.20089555700801504	0.1730356501919017
0.20091052239749527	0.17297819151984808
0.20092552529479307	0.17292048458084985
0.2009405655163789	0.17286252946630878
0.2009556428792646	0.17280432626866168
0.20097075720100238	0.17274587508137806
0.20098590829968302	0.17268717599895778
0.20100109599393434	0.172628229116929
0.20101632010291992	0.17256903453184602
0.2010315804463372	0.1725095923412865
0.2010468768444164	0.17244990264384977
0.2010622091179186	0.17238996553915448
0.20107757708813456	0.17232978112783648
0.20109298057688305	0.1722693495115462
0.2011084194065092	0.17220867079294705
0.20112389339988346	0.17214774507571287
0.2011394023803994	0.17208657246452594
0.20115494617197294	0.17202515306507474
0.2011705245990405	0.17196348698405198
0.20118613748655728	0.17190157432915207
0.2012017846599963	0.17183941520906945
0.20121746594534642	0.17177700973349638
0.2012331811691112	0.17171435801312057
0.20124893015830722	0.17165146015962357
0.20126471274046256	0.17158831628567797
0.20128052874361568	0.1715249265049461
0.2012963779963134	0.17146129093207765
0.2013122603276099	0.17139740968270753
0.20132817556706487	0.1713332828734537
0.2013441235447424	0.17126891062191574
0.2013601040912094	0.17120429304667217
0.20137611703753389	0.1711394302672787
0.2013921622152838	0.17107432240426643
0.20140823945652547	0.1710089695791395
0.20142434859382222	0.17094337191437334
0.20144048946023269	0.1708775295334125
0.2014566618893097	0.17081144256066894
0.2014728657150987	0.17074511112152
0.20148910077213603	0.17067853534230618
0.20150536689544812	0.17061171535032948
0.2015216639205492	0.17054465127385168
0.20153799168344078	0.17047734324209174
0.20155435002060954	0.17040979138522458
0.20157073876902604	0.17034199583437876
0.20158715776614372	0.17027395672163492
0.20160360684989673	0.1702056741800233
0.20162008585869934	0.17013714834352267
0.2016365946314437	0.17006837934705787
0.2016531330074992	0.16999936732649804
0.2016697008267106	0.1699301124186552
0.2016862979293964	0.16986061476128164
0.20170292415634833	0.16979087449306884
0.20171957934882886	0.1697208917536453
0.2017362633485706	0.16965066668357437
0.2017529759977746	0.1695801994243534
0.2017697171391088	0.16950949011841085
0.20178648661570708	0.16943853890910535
0.20180328427116734	0.16936734594072334
0.20182010994955069	0.16929591135847769
0.2018369634953795	0.16922423530850564
0.2018538447536365	0.16915231793786722
0.20187075356976303	0.1690801593945434
0.20188768978965804	0.16900775982743446
0.20190465325967644	0.16893511938635822
0.2019216438266277	0.16886223822204816
0.20193866133777477	0.16878911648615175
0.20195570564083262	0.1687157543312289
0.2019727765839666	0.16864215191075022
0.20198987401579158	0.1685683093790952
0.20200699778537007	0.1684942268915505
0.2020241477422115	0.16841990460430833
0.20204132373627018	0.16834534267446508
0.20205852561794452	0.16827054126001886
0.20207575323807545	0.16819550051986862
0.20209300644794506	0.1681202206138123
0.20211028509927548	0.16804470170254493
0.20212758904422723	0.1679689439476573
0.20214491813539823	0.16789294751163392
0.20216227222582217	0.1678167125578519
0.20217965116896755	0.16774023925057913
0.20219705481873612	0.16766352775497245
0.2022144830294615	0.16758657823707612
0.20223193565590813	0.16750939086382083
0.2022494125532698	0.1674319658030211
0.20226691357716842	0.16735430322337452
0.2022844385836527	0.16727640329445975
0.20230198742919672	0.167198266186735
0.202319559970699	0.1671198920715367
0.20233715606548078	0.16704128112107763
0.2023547755712851	0.16696243350844558
0.20237241834627523	0.16688334940760186
0.20239008424903365	0.16680402899337937
0.20240777313856065	0.16672447244148164
0.20242548487427298	0.16664467992848114
0.20244321931600281	0.1665646516318171
0.20246097632399618	0.16648438772979496
0.202478755758912	0.16640388840158454
0.20249655748182072	0.1663231538272183
0.2025143813542029	0.16624218418758985
0.20253222723794828	0.1661609796644531
0.2025500949953542	0.16607954044041984
0.20256798448912466	0.16599786669895894
0.20258589558236884	0.16591595862439468
0.20260382813859995	0.1658338164019056
0.20262178202173425	0.16575144021752214
0.2026397570960891	0.16566883025812623
0.20265775322638285	0.16558598671144936
0.2026757702777324	0.1655029097660713
0.20269380811565288	0.1654195996114184
0.2027118666060561	0.1653360564377625
0.2027299456152492	0.1652522804362192
0.2027480450099339	0.16516827179874682
0.2027661646572046	0.16508403071814481
0.20278430442454787	0.16499955738805216
0.2028024641798408	0.16491485200294626
0.20282064379134995	0.16482991475814157
0.20283884312773037	0.16474474584978793
0.2028570620580239	0.1646593454748697
0.20287530045165847	0.16457371383120356
0.2028935581784467	0.1644878511174382
0.20291183510858474	0.1644017575330518
0.20293013111265112	0.16431543327835196
0.20294844606160553	0.16422887855447327
0.20296677982678774	0.1641420935633764
0.20298513227991638	0.16405507850784706
0.20300350329308767	0.16396783359149392
0.2030218927387744	0.16388035901874803
0.2030403004898249	0.1637926549948613
0.2030587264194616	0.16370472172590478
0.20307717040127993	0.16361655941876774
0.20309563230924743	0.16352816828115663
0.2031141120177022	0.16343954852159304
0.2031326094013522	0.1633507003494129
0.20315112433527388	0.1632616239747654
0.20316965669491088	0.1631723196086109
0.20318820635607335	0.16308278746272065
0.20320677319493624	0.16299302774967478
0.20322535708803888	0.1629030406828616
0.20324395791228309	0.16281282647647555
0.2032625755449327	0.16272238534551692
0.20328120986361217	0.16263171750578975
0.20329986074630538	0.16254082317390106
0.20331852807135473	0.1624497025672596
0.2033372117174598	0.1623583559040747
0.2033559115636766	0.16226678340335432
0.2033746274894162	0.16217498528490476
0.20339335937444356	0.16208296176932885
0.20341210709887672	0.16199071307802515
0.2034308705431855	0.16189823943318649
0.20344964958819056	0.16180554105779843
0.2034684441150621	0.16171261817563876
0.20348725400531908	0.16161947101127594
0.20350607914082797	0.16152609979006793
0.20352491940380146	0.1614325047381609
0.20354377467679804	0.1613386860824882
0.20356264484272013	0.16124464405076927
0.20358152978481364	0.16115037887150818
0.20360042938666667	0.16105589077399274
0.20361934353220826	0.160961179988293
0.20363827210570784	0.1608662467452608
0.20365721499177364	0.16077109127652744
0.20367617207535194	0.16067571381450374
0.20369514324172602	0.16058011459237836
0.20371412837651504	0.1604842938441165
0.2037331273656731	0.16038825180445887
0.20375214009548795	0.16029198870892086
0.20377116645258037	0.1601955047937909
0.20379020632390277	0.1600988002961301
0.20380925959673826	0.16000187545377015
0.20382832615869995	0.1599047305053129
0.20384740589772932	0.159807365690129
0.20386649870209583	0.15970978124835722
0.2038856044603954	0.1596119774209025
0.20390472306154975	0.1595139544494356
0.2039238543948052	0.1594157125763916
0.20394299834973184	0.15931725204496905
0.20396215481622237	0.15921857309912907
0.20398132368449107	0.15911967598359356
0.20400050484507298	0.15902056094384448
0.20401969818882276	0.15892122822612365
0.20403890360691382	0.15882167807742992
0.20405812099083728	0.15872191074551978
0.2040773502324009	0.158621926478905
0.2040965912237283	0.15852172552685295
0.2041158438572577	0.15842130813938432
0.2041351080257414	0.1583206745672725
0.20415438362224414	0.15821982506204257
0.2041736705401428	0.1581187598759703
0.20419296867312514	0.15801747926208143
0.20421227791518873	0.1579159834741496
0.20423159816064018	0.15781427276669668
0.20425092930409408	0.15771234739499057
0.2042702712404722	0.15761020761504496
0.2042896238650022	0.15750785368361814
0.20430898707321715	0.15740528585821145
0.20432836076095426	0.15730250439706933
0.20434774482435397	0.15719950955917744
0.20436713915985913	0.15709630160426136
0.2043865436642139	0.15699288079278706
0.20440595823446311	0.15688924738595844
0.20442538276795102	0.15678540164571708
0.2044448171623205	0.15668134383474092
0.20446426131551224	0.15657707421644385
0.20448371512576344	0.15647259305497374
0.20450317849160757	0.15636790061521266
0.2045226513118727	0.1562629971627747
0.2045421334856811	0.156157882964006
0.20456162491244823	0.1560525582859832
0.20458112549188157	0.15594702339651273
0.20460063512398013	0.15584127856413
0.2046201537090332	0.1557353240580977
0.20463968114761966	0.15562916014840578
0.20465921734060707	0.15552278710577017
0.20467876218915054	0.15541620520163146
0.2046983155946923	0.15530941470815446
0.20471787745896025	0.1552024158982273
0.20473744768396762	0.15509520904546004
0.2047570261720116	0.1549877944241837
0.20477661282567294	0.1548801723094504
0.20479620754781477	0.1547723429770308
0.20481581024158163	0.15466430670341452
0.20483542081039893	0.15455606376580877
0.20485503915797185	0.15444761444213723
0.20487466518828457	0.15433895901103928
0.2048942988055994	0.15423009775186935
0.20491393991445583	0.15412103094469598
0.20493358841966985	0.15401175887030005
0.20495324422633276	0.15390228181017507
0.20497290723981096	0.153792600046526
0.20499257736574428	0.15368271386226773
0.20501225451004582	0.15357262354102486
0.20503193857890073	0.15346232936713045
0.20505162947876543	0.15335183162562538
0.20507132711636705	0.1532411306022573
0.20509103139870197	0.15313022658348013
0.20511074223303577	0.15301911985645222
0.2051304595269019	0.15290781070903697
0.20515018318810077	0.1527962994298004
0.20516991312469943	0.15268458630801152
0.20518964924503022	0.15257267163364086
0.2052093914576903	0.15246055569735972
0.2052291396715406	0.15234823879053905
0.20524889379570527	0.1522357212052498
0.20526865373957062	0.15212300323426003
0.20528841941278433	0.15201008517103587
0.20530819072525494	0.15189696730974006
0.20532796758715055	0.15178364994523053
0.20534774990889856	0.15167013337306073
0.20536753760118448	0.1515564178894777
0.20538733057495123	0.15144250379142238
0.20540712874139858	0.15132839137652715
0.2054269320119818	0.1512140809431166
0.20544674029841167	0.15109957279020625
0.20546655351265292	0.15098486721750093
0.20548637156692393	0.15086996452539553
0.20550619437369586	0.15075486501497193
0.20552602184569163	0.15063956898800124
0.20554585389588567	0.15052407674693974
0.2055656904375024	0.1504083885949305
0.20558553138401617	0.15029250483580153
0.2056053766491501	0.1501764257740651
0.2056252261468754	0.15006015171491682
0.2056450797914106	0.1499436829642355
0.2056649374972209	0.14982701982858143
0.20568479917901722	0.14971016261519632
0.20570466475175558	0.149593111632002
0.20572453413063627	0.14947586718760042
0.20574440723110332	0.14935842959127177
0.2057642839688433	0.14924079915297456
0.20578416425978507	0.14912297618334464
0.20580404802009866	0.14900496099369426
0.20582393516619477	0.14888675389601114
0.20584382561472403	0.14876835520295872
0.20586371928257594	0.1486497652278737
0.20588361608687863	0.14853098428476696
0.20590351594499764	0.1484120126883215
0.2059234187745357	0.1482928507538928
0.2059433244933314	0.1481734987975074
0.20596323301945904	0.14805395713586184
0.20598314427122769	0.1479342260863229
0.20600305816718018	0.1478143059669259
0.20602297462609298	0.14769419709637455
0.20604289356697486	0.14757389979404023
0.20606281490906664	0.1474534143799605
0.20608273857184034	0.14733274117483952
0.20610266447499823	0.1472118805000463
0.2061225925384726	0.14709083267761452
0.20614252268242456	0.14696959803024162
0.20616245482724377	0.14684817688128815
0.20618238889354734	0.1467265695547771
0.2062023248021795	0.14660477637539276
0.20622226247421077	0.14648279766848105
0.20624220183093703	0.1463606337600472
0.2062621427938793	0.14623828497675678
0.20628208528478253	0.1461157516459335
0.20630202922561539	0.14599303409555936
0.2063219745385693	0.14587013265427384
0.20634192114605776	0.14574704765137292
0.2063618689707159	0.1456237794168087
0.20638181793539945	0.14550032828118853
0.20640176796318438	0.14537669457577407
0.206421718977366	0.14525287863248132
0.20644167090145848	0.14512888078387892
0.20646162365919418	0.14500470136318855
0.20648157717452265	0.1448803407042833
0.20650153137161054	0.14475579914168746
0.20652148617484017	0.14463107701057581
0.20654144150880982	0.14450617464677296
0.20656139729833223	0.14438109238675245
0.20658135346843437	0.14425583056763647
0.20660130994435688	0.1441303895271946
0.20662126665155284	0.1440047696038435
0.206641223515688	0.14387897113664683
0.20666118046263926	0.14375299446531326
0.2066811374184947	0.14362683993019648
0.2067010943095525	0.14350050787229507
0.20672105106232055	0.14337399863325123
0.20674100760351571	0.14324731255535
0.2067609638600631	0.14312044998151885
0.20678091975909574	0.14299341125532727
0.20680087522795348	0.14286619672098538
0.20682083019418282	0.1427388067233445
0.20684078458553612	0.14261124160789485
0.20686073832997073	0.14248350172076674
0.2068806913556488	0.14235558740872806
0.20690064359093624	0.14222749901918552
0.20692059496440246	0.14209923690018217
0.20694054540481957	0.14197080140039803
0.20696049484116164	0.14184219286914945
0.2069804432026044	0.14171341165638757
0.20700039041852433	0.14158445811269849
0.20702033641849837	0.14145533258930193
0.20704028113230283	0.14132603543805178
0.20706022448991332	0.14119656701143413
0.20708016642150395	0.14106692766256762
0.20710010685744637	0.14093711774520212
0.2071200457283098	0.1408071376137186
0.20713998296485994	0.1406769876231284
0.20715991849805862	0.14054666812907268
0.2071798522590632	0.1404161794878212
0.20719978417922574	0.14028552205627232
0.20721971419009277	0.14015469619195287
0.20723964222340438	0.1400237022530164
0.2072595682110939	0.13989254059824308
0.207279492085287	0.13976121158703908
0.20729941377830152	0.13962971557943626
0.2073193332226466	0.13949805293609135
0.207339250351022	0.13936622401828486
0.207359165096318	0.1392342291879215
0.20737907739161415	0.13910206880752873
0.2073989871701794	0.13896974324025607
0.20741889436547106	0.13883725284987575
0.20743879891113426	0.1387045980007804
0.2074587007410017	0.1385717790579843
0.2074785997890927	0.1384387963871202
0.20749849598961295	0.13830565035444237
0.20751838927695365	0.1381723413268222
0.2075382795856912	0.13803886967175094
0.20755816685058667	0.13790523575733632
0.20757805100658488	0.13777143995230384
0.20759793198881427	0.1376374826259954
0.20761780973258606	0.13750336414836922
0.2076376841733939	0.13736908488999872
0.20765755524691326	0.1372346452220723
0.2076774228890007	0.1371000455163925
0.20769728703569365	0.1369652861453758
0.2077171476232095	0.13683036748205157
0.20773700458794547	0.1366952899000619
0.20775685786647768	0.13656005377366126
0.2077767073955609	0.13642465947771537
0.20779655311212789	0.1362891073877005
0.2078163949532887	0.13615339787970354
0.20783623285633065	0.13601753133042177
0.20785606675871707	0.13588150811716082
0.20787589659808742	0.1357453286178354
0.2078957223122565	0.1356089932109683
0.2079155438392138	0.13547250227568997
0.20793536111712324	0.13533585619173805
0.20795517408432232	0.13519905533945664
0.207974982679322	0.1350621000997952
0.20799478684080586	0.13492499085430926
0.20801458650762966	0.1347877279851593
0.2080343816188211	0.13465031187510978
0.20805417211357863	0.13451274290752868
0.20807395793127179	0.13437502146638808
0.20809373901144004	0.13423714793626196
0.20811351529379257	0.1340991227023267
0.20813328671820777	0.1339609461503608
0.20815305322473254	0.13382261866674333
0.20817281475358204	0.13368414063845419
0.20819257124513896	0.133545512453073
0.20821232263995323	0.13340673449877954
0.20823206887874127	0.133267807164352
0.20825180990238573	0.1331287308391677
0.20827154565193504	0.13298950591320102
0.2082912760686024	0.13285013277702473
0.2083110010937661	0.132710611821808
0.20833072066896818	0.1325709434393163
0.20835043473591472	0.13243112802191126
0.20837014323647476	0.13229116596255003
0.20838984611268005	0.13215105765478435
0.20840954330672468	0.13201080349276034
0.2084292347609643	0.1318704038712179
0.20844892041791602	0.13172985918549068
0.20846860022025748	0.1315891698315046
0.20848827411082677	0.13144833620577817
0.20850794203262185	0.1313073587054217
0.20852760392879977	0.1311662377281368
0.20854725974267677	0.131024973672216
0.20856690941772713	0.13088356693654196
0.20858655289758332	0.13074201792058726
0.2086061901260352	0.13060032702441393
0.2086258210470296	0.13045849464867237
0.20864544560466983	0.13031652119460174
0.20866506374321525	0.13017440706402916
0.20868467540708102	0.1300321526593684
0.208704280540837	0.12988975838362055
0.2087238790892082	0.1297472246403733
0.20874347099707358	0.12960455183379993
0.20876305620946578	0.12946174036865882
0.208782634671571	0.12931879065029378
0.2088022063287281	0.12917570308463272
0.2088217711264283	0.12903247807818752
0.208841329010315	0.12888911603805386
0.20886087992618274	0.12874561737190965
0.20888042381997748	0.12860198248801602
0.20889996063779545	0.12845821179521577
0.20891949032588325	0.12831430570293328
0.20893901283063704	0.12817026462117437
0.20895852809860233	0.12802608896052475
0.20897803607647356	0.12788177913215082
0.20899753671109325	0.12773733554779854
0.20901702994945223	0.12759275861979275
0.2090365157386885	0.12744804876103738
0.20905599402608738	0.12730320638501447
0.2090754647590808	0.12715823190578396
0.2090949278852467	0.12701312573798262
0.20911438335230909	0.12686788829682494
0.20913383110813705	0.1267225199981008
0.2091532711007449	0.12657702125817688
0.20917270327829104	0.1264313924939951
0.20919212758907824	0.12628563412307203
0.2092115439815529	0.12613974656349913
0.2092309524043045	0.12599373023394195
0.20925035280606546	0.12584758555363978
0.20926974513571045	0.12570131294240483
0.2092891293422562	0.1255549128206222
0.20930850537486084	0.12540838560924944
0.2093278731828238	0.1252617317298158
0.20934723271558525	0.12511495160442165
0.20936658392272545	0.1249680456557391
0.20938592675396467	0.12482101430700987
0.20940526115916264	0.12467385798204639
0.20942458708831818	0.12452657710523019
0.2094439044915688	0.12437917210151278
0.20946321331919007	0.1242316433964133
0.20948251352159572	0.12408399141602022
0.20950180504933663	0.12393621658698911
0.20952108785310092	0.1237883193365435
0.20954036188371322	0.12364030009247345
0.20955962709213447	0.12349215928313617
0.20957888342946152	0.12334389733745421
0.20959813084692638	0.1231955146849163
0.2096173692958965	0.12304701175557642
0.20963659872787366	0.12289838898005351
0.20965581909449407	0.1227496467895301
0.20967503034752782	0.1226007856157535
0.20969423243887825	0.12245180589103433
0.20971342532058213	0.12230270804824639
0.20973260894480855	0.1221534925208258
0.20975178326385932	0.12200415974277135
0.20977094823016773	0.12185471014864346
0.20979010379629898	0.12170514417356393
0.2098092499149493	0.12155546225321567
0.20982838653894545	0.1214056648238423
0.20984751362124504	0.12125575232224717
0.20986663111493534	0.12110572518579371
0.20988573897323332	0.12095558385240468
0.20990483714948532	0.12080532876056155
0.20992392559716644	0.1206549603493039
0.20994300426988027	0.12050447905823036
0.20996207312135867	0.12035388532749663
0.20998113210546115	0.12020317959781579
0.21000018117617458	0.12005236231045763
0.21001922028761286	0.11990143390724822
0.21003824939401666	0.1197503948305702
0.2100572684497527	0.11959924552336143
0.2100762774093139	0.11944798642911492
0.21009527622731838	0.11929661799187885
0.21011426485850973	0.11914514065625553
0.21013324325775629	0.1189935548674011
0.2101522113800507	0.1188418610710259
0.21017116918050988	0.11869005971339264
0.2101901166143744	0.11853815124131739
0.2102090536370082	0.11838613610216853
0.21022798020389827	0.11823401474386669
0.21024689627065427	0.11808178761488353
0.21026580179300816	0.11792945516424214
0.21028469672681377	0.11777701784151667
0.21030358102804675	0.11762447609683147
0.2103224546528037	0.11747183038086095
0.21034131755730226	0.11731908114482881
0.21036016969788082	0.11716622884050854
0.21037901103099754	0.11701327392022265
0.21039784151323088	0.11686021683684134
0.21041666110127843	0.11670705804378279
0.2104354697519572	0.11655379799501436
0.21045426742220294	0.116400437145049
0.21047305406906977	0.1162469759489475
0.21049182964973018	0.11609341486231706
0.21051059412147413	0.1159397543413106
0.21052934744170942	0.1157859948426272
0.21054808956796056	0.11563213682351148
0.21056682045786915	0.11547818074175231
0.2105855400691931	0.11532412705568451
0.2106042483598064	0.11516997622418518
0.21062294528769895	0.11501572870667731
0.21064163081097587	0.11486138496312637
0.2106603048878576	0.11470694545404075
0.2106789674766792	0.11455241064047222
0.21069761853589022	0.11439778098401449
0.21071625802405447	0.11424305694680292
0.2107348858998493	0.1140882389915156
0.2107535021220657	0.11393332758137065
0.21077210664960772	0.1137783231801282
0.2107906994414922	0.11362322625208737
0.21080928045684866	0.11346803726208898
0.21082784965491852	0.11331275667551238
0.2108464069950552	0.11315738495827793
0.21086495243672354	0.11300192257684288
0.21088348593949977	0.11284636999820491
0.21090200746307078	0.11269072768989924
0.21092051696723407	0.11253499611999918
0.21093901441189772	0.11237917575711531
0.21095749975707917	0.11222326707039604
0.21097597296290604	0.11206727052952581
0.21099443398961476	0.1119111866047266
0.2110128827975512	0.11175501576675523
0.21103131934716965	0.1115987584869057
0.21104974359903275	0.11144241523700654
0.21106815551381145	0.1112859864894215
0.21108655505228416	0.11112947271704898
0.211104942175337	0.11097287439332237
0.2111233168439629	0.11081619199220755
0.211141679019262	0.11065942598820583
0.21116002866244077	0.11050257685635062
0.21117836573481188	0.11034564507220873
0.21119669019779402	0.11018863111187965
0.2112150020129114	0.11003153545199473
0.2112333011417937	0.10987435856971722
0.21125158754617546	0.10971710094274201
0.21126986118789604	0.10955976304929621
0.21128812202889918	0.1094023453681357
0.21130637003123276	0.1092448483785482
0.21132460515704854	0.109087272560352
0.2113428273686017	0.1089296183938937
0.21136103662825073	0.10877188636005075
0.21137923289845714	0.10861407694022907
0.21139741614178498	0.10845619061636341
0.21141558632090077	0.10829822787091681
0.21143374339857288	0.10814018918688134
0.2114518873376718	0.10798207504777535
0.21147001810116928	0.10782388593764558
0.2114881356521383	0.1076656223410658
0.21150623995375287	0.10750728474313648
0.21152433096928752	0.10734887362948353
0.2115424086621172	0.10719038948626036
0.2115604729957169	0.10703183280014578
0.2115785239336613	0.10687320405834327
0.21159656143962485	0.10671450374858193
0.21161458547738085	0.10655573235911553
0.2116325960108019	0.1063968903787223
0.21165059300385897	0.10623797829670445
0.21166857642062153	0.10607899660288789
0.21168654622525715	0.10591994578762148
0.21170450238203123	0.1057608263417783
0.21172244485530678	0.10560163875675327
0.2117403736095439	0.10544238352446372
0.21175828860929982	0.10528306113734959
0.21177618981922847	0.10512367208837248
0.21179407720408028	0.10496421687101481
0.21181195072870174	0.10480469597928116
0.21182981035803533	0.10464510990769604
0.21184765605711922	0.10448545915130414
0.21186548779108677	0.10432574420567198
0.21188330552516674	0.10416596556688429
0.2119011092246823	0.10400612373154522
0.21191889885505155	0.10384621919677972
0.21193667438178673	0.10368625246022994
0.21195443577049417	0.10352622402005712
0.21197218298687392	0.10336613437494108
0.2119899159967195	0.10320598402407954
0.21200763476591789	0.1030457734671868
0.2120253392604488	0.10288550320449574
0.2120430294463847	0.10272517373675533
0.21206070528989068	0.10256478556523174
0.2120783667572238	0.1024043391917071
0.21209601381473336	0.10224383511847968
0.21211364642885994	0.10208327384836297
0.21213126456613599	0.10192265588468719
0.2121488681931849	0.10176198173129614
0.2121664572767208	0.10160125189254937
0.2121840317835489	0.10144046687332003
0.21220159168056443	0.10127962717899658
0.21221913693475308	0.10111873331547983
0.2122366675131902	0.10095778578918552
0.2122541833830409	0.10079678510704165
0.21227168451155976	0.10063573177648988
0.21228917086609025	0.10047462630548376
0.2123066424140651	0.10031346920248962
0.21232409912300543	0.10015226097648577
0.21234154096052082	0.09999100213696205
0.2123589678943091	0.09982969319391938
0.21237637989215588	0.09966833465787067
0.21239377692193462	0.09950692703983866
0.21241115895160595	0.09934547085135703
0.21242852594921782	0.09918396660446943
0.21244587788290523	0.09902241481172985
0.21246321472088958	0.09886081598620178
0.21248053643147907	0.098699170641457
0.21249784298306776	0.09853747929157708
0.21251513434413596	0.09837574245115299
0.21253241048324958	0.09821396063528276
0.21254967136906003	0.09805213435957327
0.2125669169703041	0.09789026414013896
0.21258414725580327	0.09772835049360146
0.21260136219446424	0.09756639393709032
0.2126185617552779	0.0974043949882416
0.21263574590731968	0.0972423541651975
0.21265291461974897	0.0970802719866079
0.212670067861809	0.0969181489716272
0.21268720560282672	0.09675598563991628
0.21270432781221227	0.09659378251164141
0.21272143445945918	0.09643154010747418
0.21273852551414363	0.09626925894859006
0.21275560094592472	0.09610693955667071
0.21277266072454393	0.09594458245390142
0.2127897048198249	0.09578218816297013
0.21280673320167337	0.09561975720707083
0.21282374584007674	0.09545729010989945
0.21284074270510414	0.09529478739565472
0.21285772376690582	0.09513224958903971
0.2128746889957133	0.09496967721525873
0.21289163836183894	0.09480707080001932
0.21290857183567558	0.09464443086953017
0.2129254893876967	0.09448175795050173
0.2129423909884559	0.09431905257014694
0.21295927660858677	0.09415631525617907
0.2129761462188027	0.09399354653681213
0.21299299978989655	0.09383074694076088
0.21300983729274062	0.09366791699724031
0.21302665869828608	0.09350505723596636
0.2130434639775633	0.09334216818715296
0.21306025310168109	0.09317925038151531
0.21307702604182688	0.09301630435026598
0.21309378276926622	0.09285333062511869
0.2131105232553426	0.0926903297382835
0.21312724747147765	0.09252730222247046
0.2131439553891702	0.09236424861088643
0.21316064697999662	0.0922011694372376
0.21317732221561067	0.09203806523572616
0.21319398106774262	0.09187493654105289
0.2132106235081999	0.09171178388841406
0.21322724950886615	0.09154860781350416
0.21324385904170162	0.09138540885251323
0.21326045207874245	0.09122218754212735
0.21327702859210074	0.09105894441952916
0.21329358855396444	0.09089568002239667
0.21331013193659668	0.09073239488890295
0.21332665871233625	0.09056908955771653
0.21334316885359667	0.09040576456800004
0.21335966233286646	0.09024242045941205
0.21337613912270903	0.09007905777210329
0.21339259919576187	0.08991567704672071
0.2134090425247369	0.08975227882440384
0.2134254690824202	0.08958886364678542
0.2134418788416715	0.0894254320559923
0.21345827177542429	0.08926198459464357
0.2134746478566855	0.08909852180585104
0.21349100705853527	0.08893504423321913
0.21350734935412685	0.08877155242084461
0.21352367471668635	0.08860804691331564
0.21353998311951236	0.08844452825571197
0.2135562745359761	0.08828099699360548
0.213572548939521	0.08811745367305801
0.21358880630366242	0.08795389884062393
0.21360504660198787	0.08779033304334533
0.21362126980815613	0.08762675682875798
0.21363747589589782	0.08746317074488508
0.21365366483901457	0.08729957534024091
0.21366983661137917	0.08713597116382898
0.2136859911869354	0.08697235876514142
0.21370212853969747	0.08680873869416067
0.2137182486437505	0.08664511150135717
0.21373435147324948	0.08648147773768944
0.2137504370024198	0.08631783795460535
0.21376650520555673	0.08615419270403946
0.21378255605702512	0.08599054253841526
0.21379858953125958	0.08582688801064231
0.21381460560276389	0.0856632296741191
0.21383060424611122	0.08549956808272974
0.21384658543594345	0.08533590379084521
0.21386254914697145	0.08517223735332369
0.21387849535397474	0.08500856932550876
0.21389442403180095	0.08484490026323033
0.2139103351553664	0.08468123072280426
0.21392622869965505	0.08451756126103066
0.21394210463971897	0.08435389243519653
0.21395796295067793	0.08419022480307281
0.2139738036077189	0.08402655892291477
0.21398962658609658	0.08386289535346297
0.21400543186113247	0.08369923465394169
0.21402121940821522	0.08353557738405981
0.2140369892028002	0.08337192410400851
0.21405274122040932	0.08320827537446401
0.2140684754366311	0.08304463175658405
0.21408419182711985	0.0828809938120113
0.21409989036759652	0.08271736210286951
0.2141155710338474	0.08255373719176534
0.21413123380172483	0.08239011964178805
0.21414687864714663	0.08222651001650849
0.21416250554609578	0.08206290887997919
0.21417811447462054	0.08189931679673457
0.21419370540883417	0.08173573433179016
0.21420927832491482	0.08157216205064177
0.21422483319910504	0.08140860051926646
0.21424037000771207	0.08124505030412249
0.2142558887271075	0.0810815119721473
0.21427138933372675	0.08091798609075879
0.21428687180406952	0.08075447322785478
0.21430233611469895	0.0805909739518127
0.21431778224224216	0.08042748883148843
0.21433321016338924	0.080264018436218
0.2143486198548941	0.08010056333581578
0.2143640112935733	0.07993712410057457
0.21437938445630644	0.07977370130126571
0.21439473932003617	0.0796102955091385
0.21441007586176705	0.07944690729592041
0.2144253940585669	0.07928353723381665
0.21444069388756506	0.07912018589550862
0.21445597532595345	0.07895685385415652
0.2144712383509857	0.07879354168339647
0.21448648293997719	0.07863024995734175
0.2145017090703049	0.0784669792505811
0.21451691671940726	0.0783037301381812
0.214532105864784	0.07814050319568305
0.21454727648399585	0.07797729899910483
0.2145624285546644	0.07781411812493799
0.21457756205447234	0.07765096115015252
0.21459267696116258	0.07748782865219062
0.2146077732525387	0.07732472120897121
0.21462285090646452	0.07716163939888604
0.21463790990086384	0.07699858380080249
0.21465295021372072	0.07683555499406203
0.21466797182307865	0.07667255355847902
0.21468297470704112	0.07650958007434244
0.21469795884377074	0.07634663512241457
0.21471292421148974	0.07618371928393103
0.21472787078847944	0.07602083314059943
0.21474279855308	0.07585797727460086
0.21475770748369077	0.07569515226858908
0.21477259755876932	0.07553235870569003
0.2147874687568322	0.07536959716950153
0.2148023210564542	0.07520686824409323
0.2148171544362681	0.07504417251400647
0.21483196887496508	0.07488151056425368
0.21484676435129405	0.07471888298031931
0.21486154084406178	0.0745562903481577
0.2148762983321325	0.07439373325419463
0.21489103679442806	0.07423121228532553
0.21490575620992758	0.0740687280289174
0.2149204565576672	0.07390628107280578
0.21493513781674026	0.0737438720052972
0.21494979996629668	0.07358150141516717
0.21496444298554337	0.07341916989166064
0.21497906685374368	0.0732568780244916
0.21499367155021712	0.07309462640384318
0.21500825705433993	0.07293241562036795
0.21502282334554396	0.07277024626518475
0.21503737040331736	0.07260811892988289
0.21505189820720377	0.07244603420651896
0.21506640673680272	0.0722839926876171
0.21508089597176933	0.07212199496616917
0.21509536589181358	0.07196004163563424
0.2151098164767014	0.07179813328993939
0.21512424770625316	0.07163627052347782
0.21513865956034434	0.07147445393110924
0.21515305201890547	0.07131268410816027
0.21516742506192116	0.07115096165042473
0.21518177866943114	0.07098928715416047
0.21519611282152887	0.07082766121609285
0.21521042749836256	0.07066608443341238
0.21522472268013404	0.07050455740377465
0.21523899834709928	0.07034308072530082
0.21525325447956806	0.07018165499657714
0.21526749105790355	0.07002028081665401
0.21528170806252267	0.06985895878504716
0.2152959054738956	0.0696976895017366
0.21531008327254547	0.06953647356716552
0.215324241439049	0.06937531158224208
0.21533837995403537	0.06921420414833745
0.21535249879818685	0.06905315186728689
0.21536659795223806	0.06889215534138854
0.21538067739697642	0.06873121517340414
0.21539473711324153	0.06857033196655699
0.21540877708192535	0.06840950632453463
0.2154227972839719	0.06824873885148608
0.2154367977003771	0.06808803015202258
0.21545077831218867	0.06792738083121785
0.21546473910050615	0.06776679149460735
0.21547868004648063	0.06760626274818765
0.21549260113131435	0.0674457951984167
0.21550650233626117	0.0672853894522148
0.21552038364262605	0.06712504611696113
0.21553424503176463	0.0669647658004981
0.2155480864850839	0.06680454911112627
0.21556190798404115	0.06664439665760868
0.21557570951014463	0.06648430904916691
0.2155894910449529	0.06632428689548309
0.2156032525700749	0.06616433080669937
0.21561699406716986	0.06600444139341627
0.2156307155179469	0.06584461926669583
0.21564441690416536	0.06568486503805643
0.2156580982076341	0.06552517931947699
0.21567175941021194	0.06536556272339522
0.21568540049380722	0.06520601586270702
0.2156990214403775	0.06504653935076621
0.21571262223192988	0.06488713380138472
0.21572620285052052	0.06472779982883342
0.21573976327825467	0.0645685380478393
0.21575330349728658	0.06440934907358764
0.21576682348981907	0.06425023352172121
0.21578032323810387	0.06409119200833935
0.21579380272444107	0.06393222514999886
0.21580726193117922	0.06377333356371195
0.2158207008407152	0.06361451786694916
0.21583411943549397	0.06345577867763563
0.2158475176980087	0.0632971166141536
0.21586089561080019	0.06313853229534017
0.2158742531564573	0.06298002634048927
0.21588759031761628	0.06282159936934928
0.2159009070769613	0.06266325200212519
0.2159142034172235	0.06250498485947487
0.2159274793211816	0.06234679856251346
0.21594073477166137	0.062188693732809
0.21595396975153563	0.06203067099238457
0.21596718424372427	0.06187273096371804
0.2159803782311937	0.061714874269740316
0.21599355169695722	0.06155710153383731
0.21600670462407473	0.061399413379847556
0.21601983699565233	0.061241810432064225
0.21603294879484264	0.06108429331523224
0.2160460400048444	0.06092686265455094
0.21605911060890237	0.06076951907567274
0.2160721605903075	0.06061226320470059
0.21608518993239628	0.06045509566819296
0.21609819861855106	0.060298017093158185
0.21611118663219975	0.0601410281070579
0.21612415395681583	0.059984129337805725
0.21613710057591812	0.05982732141376612
0.21615002647307055	0.05967060496375631
0.21616293163188235	0.059513980617043716
0.2161758160360077	0.05935744900334772
0.21618867966914568	0.05920101075283768
0.21620152251504007	0.059044666496135045
0.2162143445574795	0.05888841686431101
0.21622714578029703	0.058732262488886966
0.21623992616737014	0.058576204001835386
0.21625268570262063	0.05842024203557694
0.21626542437001456	0.05826437722298494
0.21627814215356206	0.058108610197379784
0.21629083903731725	0.05795294159253195
0.2163035150053781	0.05779737204266211
0.21631617004188636	0.057641902182438365
0.2163288041310273	0.05748653264697934
0.21634141725702993	0.05733126407185163
0.21635400940416652	0.05717609709306959
0.21636658055675262	0.057021032347096434
0.21637913069914722	0.05686607047084413
0.21639165981575195	0.05671121210167174
0.2164041678910119	0.056556457877385724
0.21641665490941456	0.05640180843624176
0.21642912085549057	0.056247264416940834
0.21644156571381293	0.05609282645863212
0.2164539894689973	0.05593849520091154
0.2164663921057018	0.05578427128382213
0.21647877360862672	0.05563015534785365
0.21649113396251468	0.05547614803394141
0.2165034731521503	0.05532224998346713
0.21651579116236025	0.05516846183825963
0.21652808797801304	0.055014784240592696
0.21654036358401907	0.05486121783318565
0.21655261796533015	0.0547077632592039
0.21656485110694002	0.05455442116225795
0.21657706299388343	0.05440119218640327
0.21658925361123682	0.05424807697613987
0.21660142294411774	0.054095076176413404
0.21661357097768497	0.0539421904326145
0.21662569769713808	0.05378942039057533
0.21663780308771785	0.05363676669657669
0.21664988713470565	0.05348422999733926
0.2166619498234237	0.053331810940030366
0.2166739911392349	0.053179510172259414
0.21668601106754243	0.05302732834207968
0.21669800959379004	0.05287526609798876
[truncated: 47,991 more rows]
