# Supplementary material for: Critical Phenomena of Charged AdS Black Holes in Rastall Gravity
Source: Hindawi journal article supplement (doi:10.1155/2020/4065254), 2020-01-24
Supplement: f1 [file 4065254.f1.zip › Fig5(b)-GT4.dat]

-3175.1384808362614	3.002499728410564
-393.9033260659364	1.5049978839997318
-115.23235047941711	1.0074929976901785
-47.73645601074124	0.7599836706873283
-23.86084722762444	0.6124685576616672
-13.395552746246205	0.5149463578796231
-8.12632794547699	0.4459872380366742
-5.202981088188644	0.3948756853026133
-3.46066592497795	0.3556581232598826
-2.363578948724806	0.32476195706285926
-1.6421421836553998	0.2999133203493666
-1.1508224149084212	0.2795959480245101
-0.8064554169509806	0.2627597995446636
-0.5592366630983542	0.24865455752094814
-0.3781440924789665	0.23672972654403546
-0.24319808143223964	0.22657219467175804
-0.1411554434301611	0.21786583180663746
-0.06301601053333547	0.21036455508474317
-0.0025277492032121165	0.20387389976371786
0.04473717695719922	0.19823811870004013
0.08196903022278218	0.19333096756450993
0.1115019781210904	0.18904900307102473
0.1350675437583218	0.18530662939681455
0.153966277890746	0.18203238291193866
0.16918608944065405	0.17916610849736722
0.1814851152551522	0.17665678741361862
0.19145060414840043	0.17446084780378093
0.19954131778691675	0.17254083717607707
0.20611843815415928	0.17086436949486836
0.21146835264031497	0.16940328280765096
0.21581962746588843	0.16813295987016935
0.2193557747228019	0.16703177611602432
0.22222494222304784	0.16608064796027092
0.22454732971123206	0.16526266078175464
0.2264209094868384	0.1645627606499998
0.22792587148508647	0.16396749740327368
0.22912810095933564	0.16346480936399704
0.2300819168347583	0.16304384202259725
0.2308322409554381	0.16269479459392985
0.2314163262770917	0.16240878956949947
0.23186514105356362	0.16217776134021344
0.2322044830865033	0.16199436071201762
0.23245588094680722	0.16185187272790516
0.23263732616778238	0.16174414568002055
0.23276387063331105	0.16166552957176875
0.23284811593144744	0.16161082259243087
0.23290061572731274	0.16157522441143418
0.2329302077985293	0.1615542952982069
0.23294428895429242	0.16154392023581976
0.23294904338976424	0.16154027732967954
0.2329496329345711	0.16153980992212563
0.232950356005266	0.1615392019143993
0.23295478076642917	0.16153535587268839
0.23296585696734176	0.16152537355764424
0.2329860100925501	0.1615065385692055
0.23301722080027823	0.16147630084257303
0.23306109208788575	0.16143226276824352
0.233118906191505	0.16137216674031962
0.23319167287662726	0.16129388396385316
0.23328017049131408	0.16119540437453217
0.23338498092093907	0.1610748275432532
0.23350651939271302	0.16093035445455783
0.23364505992159587	0.16076028006200294
0.2338007570601123	0.1605629865356435
0.23397366450790194	0.16033693712724034
0.2341637510484239	0.16008067058781525
0.2343709142067682	0.15979279607997704
0.23459499196132486	0.15947198853421124
0.23483577279094814	0.15911698440420977
0.2350930042964639	0.15872657778145044
0.2353664005994659	0.1582996168337108
0.23565564869115596	0.15783500053612498
0.23596041387853564	0.1573316756668256
0.23628034445377538	0.15678863404223398
0.23661507569440005	0.1562049099697168
0.23696423328652136	0.15557957789767185
0.23732743625024988	0.15491175024517165
0.237704299435284	0.15420057539512652
0.23809443564517524	0.1534452358365483
0.2384974574406639	0.15264494644293625
0.23891297866554512	0.151798952875087
0.23934061573259127	0.1509065300977677
0.23977998870195943	0.14996698100070938
0.2402307221801439	0.14897963511528406
0.24069244606376583	0.14794384741903843
0.24116479614925634	0.14685899722098666
0.24164741462669231	0.14572448712121275
0.2421399504736323	0.14453974203891984
0.2426420597627148	0.14330420830358787
0.2431534058949768	0.14201735280437633
0.24367365976928584	0.1406786621933318
0.2442024998969255	0.13928764213834877
0.24473961246919643	0.13784381662217593
0.24528469138487288	0.13634672728407815
0.24583743824346677	0.13479593280104465
0.24639756230947824	0.13319100830569647
0.24696478045213777	0.131531544838277
0.24753881706455816	0.12981714883032233
0.24811940396570473	0.1280474416178039
0.24870628028814312	0.12622205898170855
0.24929919235413772	0.12434065071418401
0.24989789354233077	0.12240288020852164
0.2505021441469367	0.12040842407138452
0.2511117112311264	0.1183569717558084
0.2517263684760488	0.11624822521361486
0.252345896026738	0.1140818985659802
0.25297008033598317	0.11185771779099438
0.25359871400708295	0.10957542042713037
0.2542315956362772	0.1072347552916259
0.2548685296555301	0.10483548221284741
0.2555093261762396	0.10237737177577583
0.25615380083435707	0.09986020507981255
0.2568017746373257	0.09728377350816292
0.25745307381317906	0.09464787850810297
0.2581075296620795	0.09195233138148495
0.2587649784105279	0.0891969530848826
0.2594252610684303	0.08638157403881364
0.2600882232891673	0.0835060339455182
0.2607537152327809	0.08057018161480695
0.26142159143236077	0.07757387479751965
0.2620917106636901	0.0745169800261733
0.2627639358181873	0.07139937246239725
0.26343813377916137	0.06822093575078536
0.26411417530138337	0.06498156187881649
0.26479193489396263	0.06168115104251459
0.26547129070650294	0.058319611517544
0.2661521244185071	0.05489685953545276
0.2668343211319874	0.051412819164791346
0.26751776926723325	0.0478674221968598
0.26820236046168255	0.04426060803583737
0.26888798947183734	0.04059232359308029
0.2695745540781613	0.03686252318536892
0.27026195499289324	0.03307116843691282
0.27095009577070955	0.02921822818492481
0.2716388827221651	0.02530367838859021
0.2723282248298423	0.021327502041262658
0.2730180336671385	0.017289689085737525
0.2737082233196169	0.013190236332447203
0.27439871030885393	0.009029147380448799
0.2750894135187074	0.004806432541066663
0.2757802541239389	0.0005221087640683297
0.2764711555211173	-0.0038238004337400877
0.2771620432617374	-0.008231265037614288
0.2778528449874839	-0.01270024860176966
0.2785434903675754	-0.017230708314173615
0.2792339110381232	-0.02182259505933054
0.2799240405434403	-0.026475853479143885
0.2806138142792395	-0.031190422031940557
0.28130316943765943	-0.03596623304973756
0.28199204495405816	-0.04080321279382548
0.2826803814555189	-0.04570128150874159
0.28336812121100946	-0.05066035347469866
0.2840552080831423	-0.05568033705853481
0.284741587481482	-0.060761134763245905
0.285427206317348	-0.06590264327615813
0.286112012960064	-0.07110475351579554
0.2867959571946044	-0.07636735067749639
0.2874789901805917	-0.08169031427782736
0.2881610644125997	-0.08707351819784165
0.2888421336817177	-0.09251683072523048
0.28952215303833423	-0.09802011459540627
0.29020107875609863	-0.1035832270315617
0.2908788682970208	-0.10920601978374184
0.291555480277671	-0.11488833916696839
0.2922308744364421	-0.12063002609845114
0.29290501160183935	-0.1264309161339161
0.2935778536617616	-0.13229083950309384
0.2942493635337417	-0.13820962114438518
0.2949195051361135	-0.14418708073874242
0.29558824336007383	-0.15022303274279414
0.29625554404260973	-0.15631728642123427
0.29692137394026186	-0.1624696458785102
0.29758570070369555	-0.16867991008982558
0.2982484928530533	-0.17494787293148706
0.29890971975406166	-0.18127332321061673
0.29956935159486753	-0.18765604469424946
0.30022735936358014	-0.19409581613783783
0.3008837148264943	-0.20059241131318317
0.30153839050697295	-0.20714559903581303
0.30219135966496663	-0.21375514319182398
0.3028425962771496	-0.22042080276419979
0.3034920750176507	-0.22714233185863653
0.304139771239361	-0.23391947972887084
0.3047856609557988	-0.2407519908015473
0.3054297208235127	-0.24763960470062346
0.30607192812500617	-0.2545820562713344
0.3067122607521665	-0.2615790756037289
0.3073506971901815	-0.2686303880557907
0.30798721650192734	-0.27573571427615723
0.3086217983128141	-0.2828947702264458
0.3092544227960723	-0.2901072672032002
0.30988507065846715	-0.2973729118594734
0.31051372312642694	-0.3046914062260453
0.3111403619325713	-0.3120624477323033
0.3117649693026281	-0.3194857292267732
0.3123875279427251	-0.32696093899733525
0.3130080210270447	-0.3344877607911104
0.31362643218583147	-0.3420658738340453
0.3142427454937397	-0.3496949528501916
0.3148569454585111	-0.3573746680806903
0.3154690170099723	-0.36510468530247886
0.3160789454893422	-0.37288466584671254
0.31668671663883796	-0.38071426661691965
0.3172923165915733	-0.3885931401068936
0.31789573186173764	-0.39652093441832803
0.31849694933504685	-0.4044972932782005
0.3190959562594608	-0.4125218560559212
0.3196927402361545	-0.4205942577802304
0.32028728921074023	-0.42871412915588025
0.32087959146472766	-0.4368810965800791
0.3214696356072203	-0.4450947821587238
0.32205741056683546	-0.45335480372241244
0.3226429055838459	-0.46166077484225454
0.32322611020253267	-0.4700123048454671
0.3238070142637459	-0.47840899883078136
0.32438560789766385	-0.4868504576836471
0.324961881516748	-0.49533627809125513
0.32553582580888507	-0.5038660525573635
0.32610743173071344	-0.5124393694169526
0.32667669050112436	-0.5210558128506974
0.32724359359493854	-0.5297149628992652
0.32780813273674664	-0.5384163954774487
0.3283702998949143	-0.5471596823881296
0.32893008727574263	-0.5559443913360818
0.3294874873177829	-0.5647700859416166
0.3300424926862985	-0.5736363257540685
0.3305950962678718	-0.5825426662651376
0.33114529116514974	-0.591488658922074
0.331693070691726	-0.6004738511407223
0.33223842836715534	-0.6094977863184224
0.33278135791209446	-0.6185600038467756
0.33332185324356955	-0.6276600391242589
0.3338599084703623	-0.6367974235687243
0.33439551788851574	-0.6459716846297585
0.3349286759769519	-0.655182345800906
0.3354593773932023	-0.6644289266317825
0.3359876169692445	-0.6737109427400516
0.33651338970744515	-0.6830279058232864
0.3370366907766029	-0.6923793236707106
0.3375575155080924	-0.7017647001748245
0.3380758593921022	-0.7111835353429111
0.3385917180739684	-0.7206353253084382
0.33910508735059725	-0.7301195623423444
0.33961596316697806	-0.7396357348642206
0.3401243416127804	-0.7491833274533812
0.34063021891903633	-0.7587618208598348
0.34113359145490296	-0.7683706920151494
0.3416344557245049	-0.7780094140432234
0.34213280836385324	-0.7876774562709465
0.34262864613783983	-0.7973742842387752
0.3431219659373037	-0.807099359711207
0.34361276477616975	-0.8168521406871626
0.3441010397886548	-0.8266320814102694
0.3445867882265418	-0.8364386323790736
0.34507000745652017	-0.846271240357136
0.3455506949575875	-0.8561293483830609
0.34602884831851555	-0.8660123957804294
0.3465044652353753	-0.8759198181676601
0.3469775435091211	-0.8858510474677648
0.34744808104323127	-0.8958055119180424
0.34791607584140644	-0.9057826360796799
0.3483815260053191	-0.9157818408472851
0.34884442973241886	-0.9258025434583297
0.3493047853137866	-0.9358441575025195
0.3497625911320415	-0.9459060929310973
0.35021784565929365	-0.9559877560660553
0.3506705474551475	-0.9660885496092895
0.35112069516474864	-0.9762078726516668
0.3515682875168784	-0.9863451206820439
0.35201332332209007	-0.9964996855961815
0.35245580147088995	-1.0066709557056321
0.3528957209319585	-1.016858315746512
0.3533330807504142	-1.0270611468882533
0.3537678800461142	-1.0372788267422548
0.3542001180119974	-1.0475107293704866
0.3546297939124616	-1.0577562252940191
0.3550569070817797	-1.0680146815014968
0.3554814569225515	-1.0782854614575512
0.35590344290418907	-1.0885679251111389
0.35632286456143836	-1.0988614289038379
0.3567397214929319	-1.1091653257780663
0.357154013359776	-1.11947896518525
0.35756573988416707	-1.1298016930939407
0.3579749008480419	-1.1401328519978593
0.35838149609175496	-1.1504717809238887
0.3587855255127875	-1.1608178154400222
0.3591869890644833	-1.171170287663244
0.35958588675481445	-1.1815285262673507
0.35998221864517177	-1.1918918564907393
0.3603759848491851	-1.2022596001441255
0.36076718553156617	-1.2126310756182033
0.3611558209069795	-1.2230055978912837
0.36154189123893626	-1.233382478536842
0.3619253968387136	-1.2437610257310483
0.36230633806429624	-1.2541405442602316
0.36268471531934243	-1.264520335528289
0.3630605290521708	-1.2748996975640718
0.36343377975477104	-1.2852779250286896
0.36380446796183374	-1.295654309222798
0.3641725942498036	-1.3060281380938112
0.3645381592359505	-1.3163986962431018
0.36490116357746305	-1.3267652649331185
0.3652616079705591	-1.3371271220944876
0.3656194931496173	-1.3474835423330482
0.3659748198863266	-1.3578337969368652
0.3663275889888525	-1.3681771538831788
0.3666778013010235	-1.3785128778453193
0.36702545770153294	-1.3888402301995804
0.36737055910315874	-1.3991584690320527
0.36771310645199856	-1.4094668491454043
0.36805310072672276	-1.4197646220656344
0.3683905429378416	-1.430051036048777
0.3687254341269886	-1.4403253360875645
0.3690577753662189	-1.4505867639180563
0.3693875677573223	-1.4608345580262259
0.36971481243115006	-1.4710679536545102
0.37003951054695744	-1.4812861828083146
0.3703616632917576	-1.4914884742624763
0.37068127187969113	-1.5016740535677302
0.3709983375514075	-1.5118421430570577
0.3713128615734593	-1.5219919618520859
0.3716248452377099	-1.5321227258693875
0.3719342898607526	-1.5422336478267822
0.37224119678334144	-1.5523239372495699
0.3725455673698357	-1.562392800476763
0.3728474030076527	-1.57243944066726
0.3731467051067353	-1.582463057805986
0.37344347509902737	-1.5924628487100128
0.37373771443796167	-1.6024380070346362
0.37402942459795857	-1.6123877232794097
0.3743186070739329	-1.6223111847941682
0.37460526338081374	-1.6322075757849894
0.37488939505307095	-1.6420760773201621
0.3751710036442543	-1.6519158673360783
0.37545009072653984	-1.6617261206431162
0.3757266578902861	-1.6715060089315048
0.37600070674359964	-1.6812547007771252
0.3762722389119097	-1.6909713616473008
0.37654125603754934	-1.7006551539065584
0.37680775977934816	-1.7103052368223506
0.37707175181223074	-1.7199207665707537
0.3773332338268248	-1.7295008962421174
0.37759220752907596	-1.739044775846733
0.37784867463987065	-1.7485515523204027
0.3781026368946673	-1.7580203695300463
0.3783540960431344	-1.7674503682792326
0.3786030538487953	-1.7768406863137027
0.37884951208868084	-1.7861904583268706
0.3790934725529888	-1.795498815965273
0.37933493704474974	-1.804764887834017
0.3795739073794999	-1.813987799502184
0.3798103853849611	-1.823166673508208
0.38004437290072507	-1.8323006293652417
0.3802758717779464	-1.8413887835664602
0.380504883879041	-1.850430249590391
0.3807314110773885	-1.8594241379061724
0.3809554552570439	-1.8683695559787967
0.3811770183124521	-1.8772656082743482
0.38139610214816927	-1.8861113962651963
0.3816127086785909	-1.8949060184351545
0.38182683982768134	-1.903648570284652
0.38203849752871444	-1.912338144335822
0.3822476837240135	-1.9209738301376285
0.38245440036470096	-1.9295547142709293
0.3826586494104493	-1.9380798803535138
0.38286043282924065	-1.9465484090451444
0.3830597525971264	-1.9549593780525432
0.3832566106979974	-1.9633118621343715
0.3834510091233523	-1.9716049331061933
0.3836429498720767	-1.9798376598453817
0.3838324349502204	-1.988009108296059
0.38401946637078493	-1.9961183414739412
0.3842040461535103	-2.004164419471234
0.38438617632467026	-2.0121463994614524
0.38456585891686695	-2.0200633357042355
0.38474309596883455	-2.0279142795501524
0.384917889525242	-2.0356982794454597
0.3850902416365031	-2.043414380936865
0.385260154358589	-2.051061626676245
0.38542762975284406	-2.058639056425358
0.38559266988580554	-2.066145707060525
0.385755276829027	-2.0735806125772953
0.3859154526589056	-2.080942804095099
0.38607319945651103	-2.0882313098618583
0.38622851930742025	-2.095445155258584
0.3863814143015535	-2.1025833628039763
0.3865318865330136	-2.1096449521589693
0.3866799380999307	-2.116628940131285
0.38682557110430604	-2.123534340679934
0.38696878765186316	-2.1303601649197392
0.38710958985189803	-2.1371054211258103
0.3872479798171358	-2.143769114737991
0.3873839596635863	-2.1503502483653185
0.3875175315104069	-2.156847821790451
0.38764869747976344	-2.1632608319740436
0.38777745969669797	-2.169588273059159
0.38790382028899584	-2.1758291363756337
0.38802778138705785	-2.1819824104444008
0.3881493451237725	-2.1880470809818493
0.3882685136343939	-2.194022130904113
0.38838528905641767	-2.199906540331372
0.38849967352946424	-2.205699286592128
0.3886116691951607	-2.211399344227452
0.3887212781970259	-2.2170056849952253
0.3888285026803589	-2.2225172778743723
0.3889333447921289	-2.2279330890690376
0.3890358066808663	-2.2332520820127972
0.3891358904965576	-2.238473217372814
0.38923359839054167	-2.243595453053987
0.3893289325154073	-2.2486177442030835
0.3894218950248938	-2.2535390432128484
0.38951248807379335	-2.2583582997261455
0.389600713817855	-2.263074460639976
0.38968657441369065	-2.2676864701096022
0.38977007201868197	-2.272193269552547
0.38985120879089186	-2.2765937976526667
0.3899299868889743	-2.280886990364157
0.39000640847208856	-2.285071780915528
0.39008047569981263	-2.2891470998136327
0.39015219073206153	-2.2931118748475896
0.3902215557290047	-2.2969650310927854
0.39028857285098556	-2.3007054909147557
0.390353244258443	-2.3043321739731484
0.390415572111835	-2.3078439972256186
0.3904755585715624	-2.311239874931702
0.39053320579789513	-2.3145187186567133
0.39058851595089966	-2.3176794372756007
0.39064149119036806	-2.3207209369767643
0.39069213367574857	-2.323642121265931
0.3907404455660761	-2.3264418909699325
0.3907864290199069	-2.329119144240508
0.3908300861952523	-2.3316727765581042
0.3908714192495143	-2.334101680735647
0.3909104303394226	-2.336404746922285
0.39094712162097317	-2.3385808626071203
0.390981495249368	-2.3406289126229742
0.3910135533789554	-2.3425477791500566
0.39104329816317174	-2.344336341719688
0.3910707317544858	-2.3459934772179913
0.39109585630434174	-2.3475180598895227
0.3911186739631056	-2.348908961340979
0.39113918688001087	-2.350165050544819
0.3911573972031067	-2.3512851938428705
0.39117330707920694	-2.352268254949988
0.39118691865383953	-2.3531130949575996
0.39119823407119664	-2.3538185723373664
0.39120725547408813	-2.3543835429446984
0.39121398500389254	-2.354806860022332
0.39121842480051305	-2.355087374203899
0.3912205770023292	-2.35522393351743
0.391220443746156	-2.3552153833889014
0.39121802716719817	-2.3550605666457374
0.39121332939900877	-2.35475832352029
0.39120635257344716	-2.354307491653367
0.3911970988206384	-2.353706906097652
0.3911855702689344	-2.352955399321176
0.3911717690448724	-2.352051801210796
0.39115569727314037	-2.350994939075589
0.3911373570765368	-2.3497836376502876
0.39111675057593537	-2.348416719098699
0.3910938798902489	-2.3468930030170863
0.3910687471363949	-2.345211306437541
0.3910413544292606	-2.343370443831394
0.3910117038816703	-2.3413692271125424
0.39097979760435175	-2.3392064656408094
0.3909456377059046	-2.3368809662252747
0.3909092262927696	-2.3343915331276115
0.39087056546919746	-2.3317369680653757
0.3908296573372179	-2.328916070215338
0.3907865039966122	-2.3259276362167483
0.39074110754488395	-2.3227704601746093
0.3906934700772306	-2.3194433336629823
0.3906435936865161	-2.315945045728175
0.39059148046324504	-2.3122743828920718
0.390537132495536	-2.3084301291552807
0.39048055186909597	-2.304411066000404
0.3904217406671952	-2.300215972395235
0.3903607009706435	-2.2958436247959586
0.39029743485776647	-2.2912927971503434
0.3902319444043811	-2.2865622609009018
0.39016423168377484	-2.2816507849880616
0.39009429876668195	-2.276557135853352
0.3900221477212636	-2.2712800774424955
0.38994778061308427	-2.2658183712085798
0.38987119950509375	-2.2601707761151553
0.38979240645760554	-2.2543360486393924
0.38971140352827827	-2.2483129427751205
0.38962819277209476	-2.242100210035951
0.38954277624134603	-2.235696599458379
0.38945515598561103	-2.229100857604808
0.3893653340517406	-2.2223117285666607
0.3892733124838376	-2.215327953967373
0.3891790933232434	-2.208148272965489
0.3890826786085196	-2.200771422257631
0.3889840703754317	-2.193196136081609
0.3888832706569354	-2.1854211462193227
0.38878028148315913	-2.177445181999829
0.3886751048813916	-2.1692669703023313
0.38856774287606616	-2.160885235559117
0.3884581974887464	-2.1522986997585676
0.3883464707381146	-2.143506082448114
0.3882325646399561	-2.1345061007371764
0.3881164812071489	-2.1252974693000817
0.387998222449649	-2.1158789003790694
0.3878777903744798	-2.106249103787114
0.3877551869857202	-2.0964067869109306
0.3876304142844919	-2.086350654713824
0.3875034742689502	-2.07607940973857
0.3873743689342728	-2.06559175211036
0.387243100272648	-2.054886379539639
0.38710967027326576	-2.04396198732493
0.3869740809223087	-2.0328172683558003
0.38683633420294095	-2.0214509131155642
0.3866964320953004	-2.0098616096842736
0.38655437657648833	-1.9980480437414476
0.38641016962056257	-1.9860088985688953
0.38626381319852826	-1.9737428550535874
0.38611530927833015	-1.9612485916903948
0.38596465982484407	-1.948524784584951
0.3858118667998703	-1.935570107456327
0.3856569321621271	-1.9223832316399505
0.38549985786724217	-1.9089628260902587
0.38534064586774625	-1.89530755738351
0.3851792981130679	-1.8814160897205436
0.3850158165495272	-1.8672870849294418
0.3848502031203279	-1.8529192024683883
0.38468245976555365	-1.8383110994283076
0.384512588422162	-1.8234614305355614
0.3843405910239796	-1.8083688481547653
0.384166469501696	-1.7930320022913695
0.38399022578286035	-1.7774495405943975
0.38381186179187576	-1.761620108359169
0.38363137944999576	-1.7455423485299035
0.38344878067531907	-1.729214901702442
0.3832640673827869	-1.7126364061268644
0.38307724148417927	-1.6958054977101693
0.38288830488811043	-1.678720810018912
0.3826972595000255	-1.6613809742818186
0.3825041072221988	-1.6437846193924466
0.3823088499537301	-1.6259303719117557
0.3821114895905414	-1.6078168560708026
0.3819120280253746	-1.5894426937732145
0.38171046714778967	-1.5708065045978945
0.38150680884416216	-1.551906905801596
0.38130105499768097	-1.5327425123214078
0.3810932074883461	-1.51331193677747
0.38088326819296764	-1.4936137894754296
0.3806712389851646	-1.4736466784090005
0.38045712173536234	-1.453409209262597
0.38024091831079176	-1.4328999854137856
0.3800226305754886	-1.4121176079358622
0.37980226039029247	-1.391060675600374
0.3795798096128458	-1.3697277848796123
0.37935528009759323	-1.348117529949176
0.37912867369578107	-1.326228502690429
0.378899992255458	-1.304059292693005
0.37866923762147253	-1.2816084872573017
0.378436411635475	-1.2588746713969936
0.3782015161359177	-1.2358564278414452
0.37796455295805365	-1.2125523370382314
0.3777255239339371	-1.1889609771555654
0.3774844308924259	-1.1650809240847766
0.3772412756591796	-1.1409107514427508
0.37699606005666136	-1.1164490305743373
0.3767487859041391	-1.0916943305548257
0.37649945501768534	-1.066645218192373
0.37624806921017934	-1.041300258030345
0.3759946302913072	-1.0156580123498644
0.375739140067564	-0.989717041172052
0.37548160034225486	-0.9634759022605537
0.37522201291549584	-0.9369331511239172
0.3749603795842171	-0.9100873410178472
0.3746967021421621	-0.8829370229477811
0.3744309823798918	-0.855480745671088
0.3741632220847855	-0.8277170556995526
0.37389342304104234	-0.7996444973016426
0.37362158702968395	-0.7712616125049077
0.3733477158285564	-0.7425669410983269
0.3730718112123338	-0.713559020634621
0.37279387495251687	-0.6842363864326129
0.3725139088174402	-0.6545975715795049
0.37223191457227117	-0.6246411069332467
0.37194789397901473	-0.594365521124812
0.3716618487965139	-0.5637693405605446
0.37137378078045424	-0.532851089424407
0.37108369168336686	-0.5016092896802686
0.3707915832546301	-0.4700424610742835
0.3704974572404722	-0.4381491211370352
0.3702013153839768	-0.4059277851859351
0.3699031594250834	-0.37337696632739714
0.3696029911005922	-0.340495175459121
0.36930081214416605	-0.3072809212724166
0.3689966242863351	-0.2737327102543514
0.3686904292544993	-0.2398490466900396
0.3683822287729329	-0.2056284326648743
0.3680720245627859	-0.17106936806676787
0.36775981834209037	-0.1361703505883829
0.36744561182576235	-0.1009298757292929
0.367129406725605	-0.0653464367982517
0.3668112047503145	-0.02941852491538821
0.3664910076054823	0.006855370985604292
0.366168816993599	0.0434767641552567
0.3658446346140595	0.08044717002617907
0.3655184621631653	0.11776810621082001
0.36519030133412966	0.1554410924993226
0.3648601538170822	0.1934676508573625
0.36452802129907075	0.23184930542399562
0.36419390546406905	0.2705875825093973
0.36385780799297723	0.30968401059284556
0.3635197305636292	0.3491401203205027
0.3631796748507944	0.38895744450330705
0.3628376425261852	0.4291375181147463
0.362493635258458	0.46968187828886365
0.36214765471322063	0.5105920643180468
0.3617997025530339	0.5518696176509184
0.3614497804374193	0.5935160818902252
0.3610978900228616	0.6355330027907156
0.3607440329628136	0.6779219282571278
0.36038821090770135	0.7206844083419532
0.3600304255049285	0.76382199524344
0.359670678398882	0.8073362433034823
0.35930897123093536	0.8512287090054989
0.35894530563945387	0.8955009509724494
0.35857968325980016	0.940154529964712
0.35821210572433926	0.9851910088779445
0.35784257466244174	1.0306119527411892
0.3574710917004909	1.0764189287146493
0.3570976584618856	1.1226135060878215
0.35672227656704775	1.1691972562772015
0.3563449476334247	1.2161717528245457
0.3559656732754957	1.2635385713945761
0.35558445510477776	1.3112992897731137
0.35520129472982875	1.3594554878650256
0.354816193756254	1.408008747692103
0.35442915378671114	1.4569606533912642
0.3540401764209151	1.506312791212276
0.3536492632556441	1.5560667495160267
0.35325641588474277	1.6062241187722504
0.3528616358991306	1.6567864915578268
0.3524649248868042	1.7077554625545333
0.3520662844328446	1.7591326285472615
0.3516657161194218	1.810919588421896
0.3512632215258001	1.8631179431634177
0.35085880222834315	1.9157292958539527
0.35045245980052075	1.9687552516707212
0.35004419581291224	2.0221974178841826
0.3496340118332134	2.076057403856045
0.3492219094262416	2.130336821037281
0.3488078901539404	2.1850372829662357
0.3483919555753866	2.240160405266686
0.3479741072467935	2.2957078056458213
0.3475543467215195	2.3516811038925023
0.3471326755500702	2.4080819218751124
0.34670909528010646	2.4649118835398034
0.34628360745644854	2.522172614908516
0.34585621362108276	2.579865744077072
0.3454269153131656	2.637992901213278
0.34499571406903085	2.696555718555074
0.34456261142219424	2.755555830408513
0.3441276089033597	2.8149948731459755
0.3436907080404234	2.874874485204324
0.3432519103584817	2.935196307082846
0.3428112173798352	2.995961981341634
0.3423686306239952	3.0571731525993484
0.3419241516076881	3.1188314675317774
0.3414777818448623	3.1809385748696313
0.341029522846694	3.2434961253968746
0.34057937612159184	3.3065057719488484
0.34012734317520316	3.369969169410287
0.33967342551041946	3.4338879747136692
0.33921762462738303	3.4982638468372214
0.33875994202349113	3.56309844680314
0.33830037919340245	3.6283934376758245
0.33783893762904316	3.6941504845598976
0.3373756188196126	3.7603712545985806
0.3369104242515883	3.8270574169716323
0.3364433554087315	3.8942106428937784
0.33597441377209486	3.9618326056127473
0.3355036008200263	4.0299249804074915
0.33503091802817453	4.0984894445864635
0.3345563668694965	4.167527677485694
0.3340799488142619	4.237041360467094
0.3336016653300591	4.307032176916597
0.3331215178818009	4.377501812242499
0.33263950793173097	4.44845195387351
0.3321556369394282	4.519884291257095
0.3316699063618139	4.591800515857654
0.3311823176531565	4.664202321154791
0.3306928722650783	4.737091402641468
0.33020157164655983	4.810469457822442
0.32970841724394795	4.884338186212193
0.3292134105009579	4.958699289333445
0.32871655285868306	5.033554470715367
0.3282178457555984	5.108905435891724
0.32771729062756694	5.184753892399226
0.3272148889078443	5.261101549775735
0.32671064202708683	5.337950119558653
0.3262045514133549	5.415301315283031
0.32569661849212106	5.493156852479961
0.325186844686273	5.571518448674809
0.3246752314161219	5.650387823385518
0.32416178009940644	5.729766698120907
0.32364649215129965	5.809656796378944
0.3231293689844136	5.890059843645046
0.322610412008806	5.970977567390316
0.32208962263198604	6.052411697070069
0.32156700225891877	6.134363964121833
0.32104255229203255	6.216836101963862
0.3205162741312238	6.299829845993417
0.3199881691738631	6.383346933585089
0.31945823881479996	6.467389104089079
0.31892648444637	6.551958098829508
0.3183929074584002	6.63705566110289
0.3178575092382132	6.722683536176254
0.31732029117063526	6.8088434712857335
0.3167812546380006	6.895537215634651
0.31624040102015727	6.982766520392026
0.3156977316944718	7.070533138690923
0.315153248035838	7.158838825626733
0.31460695141667877	7.247685338255572
0.31405884320695504	7.337074435592623
0.3135089247741683	7.42700787861055
0.3129571974833699	7.517487430237785
0.3124036626971629	7.608514855356989
0.3118483217757109	7.700091920803307
0.311291176076741	7.792220395362927
0.31073222695555247	7.8849020497712985
0.3101714757650183	7.978138656711574
0.3096089238555958	8.071931990813024
0.3090445725753267	8.16628382864944
0.3084784232698484	8.26119594873741
0.3079104772823941	8.35667013153492
0.30734073595380407	8.45270815943958
0.3067692006225247	8.549311816787128
0.3061958726246204	8.646482889849779
0.30562075329377464	8.744223166834788
0.30504384396129824	8.842534437882566
0.30446514595613283	8.941418495065468
0.3038846606048588	9.040877132385944
0.30330238923169767	9.140912145775111
0.30271833315852137	9.241525333091072
0.3021324937048532	9.342718494117474
0.3015448721878791	9.44449343056186
0.300955469922447	9.546851946054236
0.30036428822107697	9.649795846145256
0.2997713283939645	9.75332693830495
0.2991765917489868	9.857447031921003
0.2985800795917072	9.962157938297308
0.297981793225381	10.067461470652383
0.2973817339509627	10.17335944411783
0.29677990306710905	10.279853675736796
0.2961763018701855	10.386945984462422
0.29557093165427073	10.494638191156401
0.29496379371116427	10.60293211858737
0.2943548893303889	10.71182959142942
0.2937442197991991	10.821332436260548
0.2931317864025834	10.931442481561216
0.2925175904232727	11.042161557712742
0.2919016331417428	11.15349149699581
0.29128391583622226	11.265434133589105
0.2906644397826954	11.37799130356763
0.2900432062549104	11.491164844901164
0.2894202165243808	11.604956597453112
0.2887954718603962	11.719368402978596
0.28816897353002063	11.834402105123198
0.2875407227981054	11.95005954942146
0.286910720927287	12.066342583295288
0.28627896917799867	12.183253056052605
0.2856454688084717	12.300792818885746
0.28501022107474266	12.418963724870192
0.2843732272306564	12.537767628962813
0.2837344885278748	12.657206388000557
0.283094006215878	12.777281860699109
0.28245178154197303	12.897995907651163
0.281807815751296	13.01935039132508
0.28116211008682096	13.141347176063576
0.2805146657893609	13.26398812808208
0.2798654840975765	13.387275115467272
0.27921456624797747	13.511210008175757
0.2785619134749331	13.635794678032578
0.2779075270106712	13.76103099872988
0.277251408085288	13.886920845825088
0.2765935579267506	14.013466096739975
0.2759339777609043	14.140668630758974
0.2752726688114749	14.268530329027673
0.274609632300075	14.397053074551625
0.2739448694462111	14.526238752194661
0.27327838146728556	14.656089248677647
0.272610169578603	14.786606452577107
0.27194023499337494	14.917792254323532
0.27126857892272577	15.049648546200334
0.27059520257569725	15.182177222342219
0.26992010715925246	15.315380178733662
0.26924329387828255	15.449259313207946
0.2685647639356096	15.58381652544529
0.26788451853199574	15.719053716971668
0.26720255886614175	15.854972791157403
0.2665188861346965	15.991575653215698
0.2658335015322625	16.128864210201517
0.2651464062513974	16.266840371009668
0.26445760148262154	16.405506046374004
0.26376708841442065	16.544863148865694
0.2630748682332537	16.68491359289194
0.2623809421235548	16.825659294694532
0.26168531126774053	16.967102172348667
0.26098797684621305	17.10924414576126
0.2602889400373651	17.25208713666998
0.25958820201758626	17.395633068641526
0.25888576396126534	17.53988386707045
0.25818162704079745	17.684841459177754
0.25747579242658863	17.830507774009572
0.25676826128705904	17.97688474243576
0.256059034788648	18.12397429714858
0.2553481140958213	18.27177837266139
0.2546355003710718	18.42029890530705
0.2539211947749286	18.569537833237046
0.2532051984659576	18.719497096419694
0.2524875126007692	18.87017863663914
0.2517681383340225	19.021584397493665
0.251047076818428	19.173716324394853
0.25032432920475417	19.32657636456573
0.2495998966418328	19.480166467039858
0.24887378027656137	19.634488582659646
0.24814598125390933	19.789544664075347
0.2474165007169224	19.945336665743557
0.24668533980672694	20.101866543926
0.24595249966253369	20.259136256688066
0.24521798142164544	20.417147763897752
0.2444817862194576	20.575903027224005
0.2437439151894651	20.735404010135884
0.24300436946326823	20.895652677900557
0.2422631501705725	21.056650997582846
0.24152025843919958	21.218400938043217
0.24077569539508606	21.38090446993692
0.24002946216229096	21.54416356571253
0.239281559863	21.7081801996106
0.23853198961752858	21.872956347662534
0.23778075254432962	22.03849398768907
0.2370278497599944	22.204795099299343
0.2362732823792574	22.371861663889263
0.2355170515150046	22.539695664640305
0.23475915827827218	22.70829908651843
0.23399960377825585	22.877673916272606
0.233238389122313	23.047822142433674
0.232475515415966	23.218745755312952
0.23171098376291	23.39044674700106
0.23094479526501363	23.56292711136658
0.23017695102232608	23.73618884405485
0.22940745213308034	23.91023394248673
0.2286362996936974	24.085064405857228
0.2278634947987902	24.26068223513449
0.2270890385411697	24.437089433058183
0.22631293201184685	24.61428800413847
0.2255351763000397	24.792279954654944
0.2247557724931747	24.971067292654915
0.223974721676893	25.150652027952592
0.22319202493505347	25.331036172127504
0.22240768334973907	25.51222173852365
0.22162169800125714	25.694210742247858
0.22083406996814864	25.877005200168895
0.22004480032718798	26.06060713091595
0.21925389015339083	26.24501855487756
0.21846134052001454	26.430241494200487
0.21766715249856514	26.61627797278808
0.21687132715880253	26.803130016299626
0.21607386556874053	26.99079965214868
0.21527476879465302	27.179288909502038
0.21447403790108088	27.368599819278465
0.21367167395083184	27.55873441414762
0.2128676780049868	27.74969472852858
0.21206205112290408	27.941482798588886
0.21125479436222247	28.13410066224317
0.21044590877886624	28.327550359151942
0.20963539542704865	28.521833930720682
0.20882325535927523	28.71695342009818
0.20800948962635135	28.912910872175726
0.2071940992773806	29.109708333585665
0.20637708535977517	29.307347852700413
0.20555844891925412	29.505831479631038
0.20473819099985063	29.7051612662262
0.20391631264391627	29.905339266071003
0.2030928148921229	30.106367534485702
0.20226769878346817	30.308248128524596
0.20144096535528014	30.51098310697494
0.20061261564321806	30.714574530355407
0.19978265068127915	30.9190244609154
0.1989510715018038	31.12433496263339
0.1981178791354749	31.33050810121633
0.19728307461132616	31.53754594409782
0.19644665895674412	31.745450560437355
0.19560863319747065	31.95422402111914
0.19476899835761094	32.16386839875086
0.19392775545963237	32.374385767662446
0.19308490552437108	32.58577820390496
0.19224044957103723	32.79804778524952
0.19139438861721628	33.01119659118616
0.19054672367887376	33.22522670292235
0.18969745577035796	33.440140203382356
0.18884658590440634	33.65593917720574
0.18799411509214756	33.872625710746235
0.18714004434310524	34.09020189207075
0.18628437466520117	34.308669810958186
0.18542710706476104	34.528031558898086
0.1845682425465171	34.74828922908993
0.18370778211361094	34.96944491644143
0.18284572676759966	35.191500717568005
0.18198207750845688	35.414458730791
0.18111683533457848	35.63832105613722
0.1802500012427841	35.86308979533728
0.1793815762283238	36.0887670518248
0.1785115612848805	36.31535493073504
0.1776399574045721	36.54285553890397
0.17676676557795548	36.77127098486719
0.1758919867940351	37.00060337885832
0.1750156220402577	37.23085483280865
0.1741376723025251	37.46202746034546
0.17325813856519062	37.6941233767911
0.1723770218110665	37.92714469916177
0.17149432302142786	38.1610935461667
0.17061004317601366	38.395972038206686
0.1697241832530314	38.63178229737325
0.16883674422916398	38.86852644744724
0.1679477270795668	39.106206613898095
0.16705713277787593	39.344824923882534
0.16616496229621214	39.584383506243476
0.1652712166051808	39.82488449150896
0.16437589667387864	40.066330011890955
0.1634790034698957	40.308722201284525
0.16258053795931865	40.55206319526645
0.16168050110673657	40.79635513109447
0.16077889387524108	41.041600147705694
0.15987571722643254	41.28780038571587
0.1589709721204208	41.534957987418586
0.15806465951583254	41.78307509678345
0.15715678036981132	42.03215385945566
0.15624733563802176	42.282196422754524
0.1553363262746545	42.53320493567264
0.1544237532324268	42.78518154887467
0.1535096174625903	43.03812841469631
0.15259391991492932	43.292047687143366
0.15167666153776818	43.546941521890425
0.15075784327797193	43.802812076279956
0.14983746608095283	44.05966150932108
0.14891553089066933	44.31749198168885
0.14799203864963242	44.57630565572291
0.1470669902989115	44.83610469542644
0.14614038677813038	45.09689126646511
0.1452122290254771	45.35866753616622
0.14428251797770522	45.62143567351741
0.1433512545701356	45.88519784916578
0.14241843973666318	46.14995623541664
0.14148407440975563	46.41571300623266
0.14054815952046007	46.68247033723278
0.13961069599840623	46.95023040569103
0.13867168477180786	47.21899539053567
0.13773112676746724	47.488767472348066
0.13678902291077882	47.75954883336156
0.13584537412573114	48.031341657460686
0.13490018133490983	48.30414813017974
0.1339534454595042	48.57797043870217
0.13300516741930496	48.852810771859474
0.13205534813271283	49.128671320129754
0.13110398851673824	49.40555427563702
0.13015108948700496	49.683461832150314
0.12919665195775612	49.96239618508238
0.12824067684185286	50.24235953148866
0.1272831650507804	50.523354070066716
0.1263241174946509	50.80538200115436
0.12536353508220566	51.088445526729544
0.12440141872082038	51.37254685040879
0.12343776931650433	51.65768817744626
0.12247258777390777	51.94387171473297
0.12150587499632244	52.23109967079527
0.12053763188568545	52.51937425579457
0.11956785934258209	52.808697681525736
0.1185965582662492	53.099072161416395
0.11762372955457755	53.390499910525634
0.11664937410411659	53.68298314554326
0.11567349281007601	53.976524084788835
0.11469608656632771	54.271124948210534
0.11371715626541277	54.56678795738395
0.11273670279853992	54.86351533551144
0.11175472705559067	55.16130930742125
0.11077122992512405	55.460172099565874
0.10978621229437599	55.76010594002171
0.10879967504926363	56.06111305848783
0.10781161907439178	56.363195686284946
0.10682204525304881	56.66635605635436
0.10583095446721805	56.97059640325726
0.10483834759757277	57.27591896317339
0.10384422552348406	57.58232597390025
0.10284858912302337	57.88981967485235
0.10185143927296283	58.19840230705968
0.10085277684878004	58.50807611316722
0.09985260272466324	58.81884333743357
0.09885091777350866	59.13070622573053
0.09784772286692789	59.443667025541274
0.09684301887525001	59.757727985960386
0.09583680666752341	60.072891357692
0.09482908711151862	60.38915939304964
0.09381986107373155	60.706534345954424
0.0928091294193873	61.02501847193468
0.09179689301244284	61.34461402812475
0.0907831527155869	61.66532327326419
0.08976790939024708	61.98714846769681
0.08875116389658978	62.31009187336912
0.08773291709352463	62.63415575383035
0.08671316983870578	62.959342374230864
0.08569192298853676	63.28565400132133
0.08466917739817001	63.61309290345174
0.08364493392151404	63.94166135057068
0.0826191934112324	64.2713616142239
0.08159195671874739	64.60219596755395
0.08056322469424618	64.93416668529886
0.07953299818667636	65.26727604379118
0.07850127804375762	65.60152632095738
0.0774680651119772	65.93691979631637
0.07643336023659483	66.27345875097903
0.07539716426164864	66.6111454676472
0.0743594780299528	66.94998223061235
0.07332030238310304	67.2899713257555
0.07227963816148057	67.63111504054483
0.07123748620425137	67.9734156640364
0.07019384734937144	68.31687548687205
0.06914872243358829	68.66149680127927
0.0681021122924445	69.00728190106933
0.06705401776027961	69.35423308163728
0.06600443967023328	69.70235263996068
0.06495337885424711	70.05164287459827
0.0639008361430688	70.40210608568984
0.06284681236625347	70.75374457495445
0.0617913083521661	71.10656064569035
0.06073432492798637	71.46055660277342
0.05967586291970752	71.81573475265637
0.05861592315214313	72.17209740336827
0.057554506448925825	72.529646864513
0.05649161363251277	72.88838544726886
0.05542724552418755	73.2483154643873
0.05436140294406209	73.609439230192
0.05329408671107808	73.97175906057846
0.05222529764301338	74.33527727301264
0.05115503655647987	74.69999618652966
0.05008330426693074	75.06591812173413
0.0490101015886584	75.43304540079805
0.04793542933479998	75.8013803474604
0.046859288317339674	76.1709252870264
0.045781679347110256	76.54168254636615
0.04470260323379544	76.91365445391402
0.04362206078593363	77.286843339668
0.04254005281091939	77.6612515351883
0.041456580115006296	78.03688137359656
0.04037164350331024	78.41373518957546
0.039285243779809596	78.79181531936705
0.038197381747350295	79.17112410077239
0.037108058207646885	79.55166387315087
0.03601727396128412	79.9334369774184
0.03492502980772284	80.31644575604746
0.03383132654529893	80.70069255306583
0.032736164971225695	81.08617971405569
0.031639545881599854	81.47290958615284
0.03054147007139954	81.86088451804574
0.02944193833449118	82.25010685997466
0.028340951463626588	82.64057896373075
0.027238510250450782	83.03230318265527
0.02613461548550173	83.42528187163838
0.025029267958211927	83.8195173871193
0.02392246845691042	84.21501208708376
0.022814217768830584	84.61176833106467
0.021704516680105482	85.00978848014046
0.020593365975773454	85.40907489693437
0.019480766439781014	85.80962994561338
0.01836671885498401	86.21145599188789
0.017251224003150094	86.61455540301039
0.016134282664962533	87.0189305477746
0.015015895620020049	87.42458379651504
0.01389606364684061	87.83151752110557
0.012774787522863955	88.23973409495898
0.011652068024453618	88.64923589302593
0.010527905926899003	89.06002529179423
0.009402302004416989	89.47210466928777
0.008275257030156661	89.88547640506572
0.0071467717761995965	90.30014288022198
0.0060168470135606045	90.7161064773839
0.004885483512194232	91.1333695807117
0.003752682040994184	91.55193457589759
0.0026184433677953972	91.97180385016499
0.001482768259377449	92.39297979226714
0.00034565748146621073	92.81546479248702
-0.0007928882012627411	93.23926124263619
-0.0019328680251838063	93.66437153605376
-0.003074281227718384	94.0907980676057
-0.004217127047332324	94.51854323368431
-0.005361404723532939	94.9476094322066
-0.006507113496870012	95.37799906261455
-0.007654252608927916	95.80971452587303
-0.00880282130232972	96.24275822447004
-0.009952818820730635	96.67713256241517
-0.011104244408817226	97.11283994523913
-0.0122570973123062	97.54988277999286
-0.013411376777940479	97.98826347524641
-0.014567082053487546	98.42798444108858
-0.01572421238773907	98.86904808912607
-0.016882767030505248	99.31145683248191
-0.018042745232616196	99.75521308579538
-0.019204146245918062	100.20031926522131
-0.02036696932326998	100.6467777884284
-0.02153121371854416	101.09459107459922
-0.022696878686621964	101.5437615444291
-0.023863963483393966	101.99429162012508
-0.02503246736575427	102.44618372540555
-0.02620238959160101	102.89944028549898
-0.02737372941983508	103.35406372714354
-0.02854648611035531	103.81005647858588
-0.0297206589240572	104.2674209695805
-0.030896247122833415	104.72615963138892
-0.03207324996956674	105.18627489677901
-0.03325166672813455	105.64776920002386
-0.034431496663400014	106.11064497690134
-0.03561273904121344	106.57490466469302
-0.036795393128411444	107.04055070218337
-0.03797945819281298	107.50758552965927
-0.03916493350321585	107.97601158890859
-0.04035181832939849	108.44583132321999
-0.041540111942114696	108.91704717738222
-0.04272981361309364	109.38966159768225
-0.043920922615036335	109.8636770319058
-0.04511343822161392	110.33909592933577
-0.04630735970746719	110.81592074075165
-0.047502686348202657	111.29415391842848
-0.048699417420391224	111.77379791613687
-0.04989755220156553	112.2548551891406
-0.05109708997022131	112.73732819419774
-0.052298030005809376	113.22121938955885
-0.053500371588738785	113.70653123496561
-0.05470411400037281	114.19326619165143
-0.055909256523027626	114.68142672233954
-0.057115798439970084	115.17101529124292
-0.058323739035413706	115.66203436406293
-0.05953307759452138	116.15448640798866
-0.060743813403399086	116.64837389169664
-0.06195594574909504	117.14369928534938
-0.06316947391960012	117.6404650605952
-0.06438439720384248	118.1386736905669
-0.06560071489168717	118.63832764988133
-0.06681842627393651	119.13942941463846
-0.06803753064232208	119.6419814624208
-0.06925802728951001	120.14598627229195
-0.07047991550909437	120.65144632479713
-0.07170319459559571	121.1583641019609
-0.07292786384446244	121.66674208728752
-0.07415392255206277	122.17658276575983
-0.07538137001569092	122.6878886238379
-0.07661020553355817	123.20066214945935
-0.07784042840479329	123.71490583203781
-0.07907203792944383	124.23062216246228
-0.08030503340846894	124.74781363309621
-0.0815394141437403	125.26648273777722
-0.08277517943804065	125.78663197181625
-0.08401232859506289	126.30826383199614
-0.08525086091940295	126.83138081657165
-0.08649077571656548	127.35598542526836
-0.08773207229295536	127.88208015928183
-0.08897474995587988	128.4096675212769
-0.09021880801354643	128.9387500153871
-0.09146424577505717	129.46933014721387
-0.09271106255041336	130.00141042382532
-0.09395925765050865	130.53499335375622
-0.09520883038712856	131.07008144700674
-0.09645978007294956	131.60667721504174
-0.09771210602153539	132.1447831707903
-0.09896580754733884	132.68440182864478
-0.10022088396569538	133.22553570445987
-0.10147733459282357	133.768187315552
-0.102735158745825	134.31235918069896
-0.10399435574268064	134.85805382013876
-0.10525492490224671	135.4052737555687
-0.10651686554425915	135.9540215101448
-0.10778017698932503	136.50429960848138
-0.10904485855892553	137.05611057665016
-0.11031090957541329	137.60945694217966
-0.11157832936200691	138.16434123405307
-0.11284711724279578	138.72076598270974
-0.11411727254273288	139.27873372004305
-0.11538879458763554	139.83824697939997
-0.11666168270418185	140.39930829558037
-0.1179359362199136	140.961920204836
-0.1192115544632265	141.52608524487044
-0.1204885367633775	142.0918059548378
-0.12176688245047458	142.65908487534168
-0.1230465908554833	143.2279245484354
-0.12432766131021775	143.79832751762038
-0.12561009314734445	144.37029632784615
-0.126893885700377	144.94383352550872
-0.12817903830367536	145.5189416584509
-0.12946555029244455	146.09562327596078
-0.13075342100273452	146.67388092877135
-0.1320426497714359	147.2537171690594
-0.13333323593627738	147.83513455044533
-0.13462517883582822	148.41813562799263
-0.13591847780949445	149.0027229582057
-0.13721313219751535	149.58889909903098
-0.13850914134096548	150.17666660985495
-0.13980650458174873	150.7660280515043
-0.1411052212626019	151.35698598624407
-0.14240529072708677	151.94954297777815
-0.1437067123195947	152.54370159124784
-0.14500948538534048	153.1394643932317
-0.14631360927036455	153.73683395174345
-0.14761908332152443	154.33581283623352
-0.14892590688650467	154.93640361758634
-0.15023407931380178	155.5386088681207
-0.1515435999527342	156.1424311615882
-0.15285446815343368	156.74787307317388
-0.15416668326684438	157.3549371794937
-0.15548024464472576	157.9636260585955
-0.15679515163964444	158.57394228995778
-0.15811140360497977	159.18588845448798
-0.15942899989491582	159.7994671345236
-0.1607479398644429	160.4146809138295
-0.16206822286935568	161.0315323775989
-0.16338984826625294	161.65002411245194
-0.16471281541253138	162.27015870643456
-0.16603712366639106	162.89193874901892
-0.16736277238682645	163.5153668311014
-0.16868976093363164	164.14044554500325
-0.17001808866739287	164.7671774844681
-0.17134775494949042	165.39556524466363
-0.1726787591420974	166.02561142217849
-0.17401110060817646	166.6573186150236
-0.17534477871147924	167.29068942262967
-0.17667979281654309	167.92572644584823
-0.17801614228869309	168.56243228694944
-0.17935382649403567	169.20080954962242
-0.18069284479946338	169.84086083897435
-0.1820331965726466	170.48258876152903
-0.1833748811820362	171.12599592522736
-0.1847178979968636	171.77108493942563
-0.18606224638713148	172.4178584148958
-0.18740792572362275	173.0663189638242
-0.1887549353778903	173.71646919981
-0.19010327472226027	174.3683117378667
-0.191452943129831	175.0218491944198
-0.1928039399744658	175.67708418730618
-0.1941562646307989	176.33401933577437
-0.19550991647423002	176.9926572604825
-0.19686489488092188	177.65300058349936
-0.19822119922780224	178.31505192830153
-0.19957882889255982	178.97881391977515
-0.20093778325364262	179.6442891842131
-0.20229806169025785	180.31148034931564
-0.20365966358237128	180.98039004418936
-0.2050225883107025	181.65102089934635
-0.20638683525672616	182.32337554670323
-0.20775240380267002	182.9974566195822
-0.20911929333151413	183.6732667527073
-0.21048750322698648	184.3508085822067
-0.2118570328735647	185.03008474561048
-0.21322788165647433	185.71109788185038
-0.21460004896168586	186.39385063125917
-0.21597353417591356	187.07834563556918
-0.21734833668661546	187.7645855379133
-0.21872445588199071	188.45257298282257
-0.22010189115097822	189.14231061622695
-0.22148064188325683	189.83380108545308
-0.2228607074692397	190.52704703922544
-0.2242420873000786	191.22205112766434
-0.2256247807676594	191.9188160022856
-0.22700878726459842	192.61734431600001
-0.2283941061842474	193.31763872311305
-0.22978073692068562	194.01970187932315
-0.23116867886872233	194.72353644172233
-0.23255793142389394	195.42914506879393
-0.23394849398246187	196.1365304204143
-0.23534036594141391	196.84569515784992
-0.2367335466984611	197.55664194375743
-0.238128035652035	198.2693734421834
-0.23952383220128912	198.98389231856405
-0.24092093574609613	199.70020123972262
-0.24231934568704586	200.4183028738713
-0.24371906142544456	201.13819989060852
-0.2451200823633147	201.85989496091983
-0.24652240790339167	202.5833907571757
-0.24792603744912395	203.30868995313247
-0.24933097040467067	204.0357952239304
-0.25073720617490103	204.76470924609373
-0.2521447441653929	205.49543469753027
-0.2535535837824299	206.22797425752967
-0.2549637244330035	206.9623306067638
-0.25637516552480843	207.69850642728574
-0.25778790646624294	208.43650440252952
-0.25920194666640806	209.17632721730806
-0.2606172855351016	209.91797755781482
-0.26203392248282603	210.661458111621
-0.2634518569207782	211.40677156767634
-0.26487108826085165	212.15392061630766
-0.266291615915637	212.9029079492191
-0.2677134392984173	213.65373625948985
-0.26913655782316837	214.4064082415756
-0.2705609709045594	215.16092659130632
-0.27198667795794634	215.9172940058861
-0.27341367839937675	216.67551318389292
-0.27484197164558577	217.43558682527748
-0.27627155711399215	218.19751763136313
-0.2777024342227031	218.96130830484438
-0.279134602390507	219.72696154978678
-0.2805680610368751	220.49448007162673
-0.2820028095819618	221.2638665771699
-0.283438847446598	222.03512377459157
-0.28487617405229615	222.80825437343492
-0.2863147888212456	223.58326108461205
-0.28775469117631164	224.36014662040068
-0.2891958805410329	225.138913694447
-0.2906383563396249	225.91956502176183
-0.2920821179969714	226.70210331872187
-0.2935271649386318	227.48653130306852
-0.29497349659083166	228.2728516939075
-0.29642111238046825	229.06106721170758
-0.29787001173510463	229.85118057830093
-0.2993201940829699	230.64319451688178
-0.30077165885295803	231.4371117520057
-0.30222440547462864	232.23293500958985
-0.30367843337820344	233.03066701691145
-0.305133741994562	233.83031050260718
-0.30659033075524866	234.63186819667374
-0.30804819909246484	235.4353428304657
-0.30950734643907096	236.24073713669574
-0.31096777222857835	237.04805384943376
-0.3124294758951618	237.8572957041067
-0.3138924568736459	238.66846543749756
-0.3153567145995072	239.4815657877441
-0.31682224850887525	240.29659949433963
-0.3182890580385325	241.113569298132
-0.3197571426259065	241.9324779413217
-0.32122650170907463	242.75332816746337
-0.3226971347267628	243.5761227214633
-0.3241690411183398	244.4008643495797
-0.32564222032382406	245.2275557994225
-0.32711667178387055	246.05619981995176
-0.32859239493978154	246.8867991614772
-0.3300693892334992	247.7193565756587
-0.3315476541076047	248.55387481550449
-0.3330271890053187	249.3903566353714
-0.3345079933704995	250.22880479096304
-0.3359900666476424	251.0692220393312
-0.33747340828187583	251.91161113887267
-0.33895801771896605	252.75597484933104
-0.3404438944053094	253.60231593179438
-0.3419310377879337	254.450637148696
-0.34341944731449964	255.30094126381277
-0.34490912243329763	256.15323104226474
-0.3464000625932433	257.00750925051534
-0.34789226724388345	257.8637786563697
-0.34938573583538884	258.7220420289747
-0.3508804678185542	259.58230213881836
-0.3523764626448028	260.4445617577287
-0.35387371976617565	261.3088236588738
-0.3553722386353372	262.17509061676094
-0.3568720187055734	263.043365407236
-0.3583730594307898	263.91365080748324
-0.3598753602655073	264.7859495960234
-0.36137892066486954	265.660264552715
-0.3628837400846291	266.53659845875234
-0.3643898179811604	267.41495409666567
-0.36589715381144705	268.29533425031974
-0.36740574703308765	269.17774170491464
-0.36891559710429145	270.06217924698365
-0.3704267034838804	270.9486496643935
-0.3719390656312835	271.8371557463443
-0.37345268300653894	272.72770028336714
-0.374967555070292	273.62028606732594
-0.3764836812837975	274.51491589141426
-0.37800106110890985	275.4115925501572
-0.3795196940080917	276.31031883940886
-0.38103957944440686	277.2110975563531
-0.3825607168815224	278.1139314995024
-0.38408310578370436	279.01882346869684
-0.3856067456158217	279.9257762651043
-0.38713163584333876	280.8347926912198
-0.38865777593231904	281.7458755508642
-0.3901851653494234	282.6590276491843
-0.39171380356190677	283.5742517926525
-0.3932436900376203	284.491550789065
-0.39477482424500865	285.4109274475425
-0.3963072056531054	286.33238457852894
-0.3978408337315401	287.2559249937918
-0.3993757079505311	288.1815515064197
-0.40091182778088247	289.1092669308243
-0.40244919269399276	290.039074082737
-0.4039878021618423	290.9709757792107
-0.40552765565700144	291.9049748386184
-0.407068752652624	292.84107408065205
-0.40861109262244677	293.77927632632264
-0.41015467504079206	294.7195843979599
-0.4116994993825621	295.6620011192101
-0.41324556512324245	296.60652931503813
-0.41479287173889523	297.5531718117245
-0.4163414187061652	298.5019314368663
-0.4178912055022722	299.45281101937553
-0.4194422316050155	300.40581338947953
-0.42099449649276877	301.3609413787199
-0.42254799964447987	302.3181978199519
-0.4241027405396741	303.27758554734413
-0.42565871865844523	304.2391073963779
-0.4272159334814608	305.20276620384624
-0.4287743844899616	306.1685648078538
-0.43033407116575545	307.1365060478167
-0.4318949929912182	308.1065927644609
-0.4334571494492967	309.0788277998227
-0.4350205400235033	310.05321399724653
-0.43658516419791726	311.0297542013874
-0.43815102145718066	312.0084512582069
-0.4397181112865006	312.98930801497505
-0.4412864331716494	313.97232732026885
-0.4428559865989585	314.9575120239712
-0.44442677105532014	315.94486497727166
-0.4459987860281887	316.9343890326647
-0.4475720310055776	317.92608704395025
-0.4491465054760575	318.9199618662317
-0.450722208928756	319.91601635591684
-0.4522991408533566	320.9142533707164
-0.453877300740101	321.9146757696439
-0.45545668807978057	322.91728641301427
-0.45703730236374424	323.9220881624446
-0.45861914308389057	324.92908388085294
-0.46020220973267034	325.9382764324579
-0.4617865018030847	326.9496686827777
-0.46337201878868717	327.9632634986292
-0.4649587601835733	328.97906374812953
-0.46654672548239234	329.99707230069316
-0.46813591418033795	331.01729202703257
-0.46972632577314904	332.03972579915666
-0.4713179597571101	333.06437649037207
-0.47291081562905113	334.0912469752804
-0.47450489288633985	335.12034012977995
-0.47610019102689244	336.15165883106295
-0.4776967095491621	337.18520595761674
-0.4792944479521419	338.2209843892217
-0.4808934057353691	339.25899700695334
-0.48249358239891055	340.2992466931779
-0.4840949774433802	341.34173633155444
-0.48569759036992155	342.38646880703504
-0.4873014206802149	343.4334470058615
-0.4889064678764785	344.4826738155671
-0.4905127314614603	345.5341521249748
-0.4921202109384436	346.58788482419715
-0.49372890581124285	347.64387480463637
-0.49533881558420334	348.7021249589829
-0.4969499397622001	349.7626381812141
-0.49856227785063656	350.8254173665961
-0.5001758293554468	351.8904654116821
-0.5017905937830919	352.9577852143103
-0.5034065706405583	354.0273796736058
-0.5050237594353573	355.0992516899791
-0.5066421596755264	356.17340416512513
-0.5082617708696281	357.2498400020222
-0.5098825925267426	358.3285621049343
-0.5115046241564797	359.40957337940677
-0.5131278652689635	360.4928767322691
-0.5147523153748425	361.57847507163183
-0.5163779739852834	362.66637130688736
-0.5180048406119713	363.7565683487097
-0.5196329147671086	364.84906910905266
-0.5212621959634156	365.94387650115067
-0.5228926837141276	367.0409934395171
-0.5245243775329946	368.14042283994473
-0.5261572769342808	369.242167619505
-0.5277913814327662	370.34623069654657
-0.529426690543739	371.4526149906964
-0.5310632037830024	372.5613234228572
-0.5327009206668689	373.6723589152093
-0.5343398407121612	374.78572439120813
-0.5359799634362101	375.90142277558385
-0.5376212883568551	377.019456994343
-0.5392638149924462	378.13982997476535
-0.5409075428618322	379.2625446454042
-0.5425524714843748	380.38760393608703
-0.5441986003799364	381.51501077791323
-0.5458459290688861	382.6447681032548
-0.5474944570720931	383.77687884575573
-0.5491441839109311	384.9113459403301
-0.5507951091072734	386.0481723231637
-0.5524472321834967	387.18736093171196
-0.554100552662474	388.3289147046996
-0.5557550700675787	389.4728365821219
-0.5574107839226823	390.61912950524135
-0.5590676937521539	391.76779641658874
-0.5607257990808593	392.9188402599629
-0.5623850994341559	394.07226398042945
-0.5640455943379018	395.2280705243204
-0.5657072833184446	396.3862628392336
-0.5673701659026291	397.54684387403387
-0.569034241617787	398.70981657884914
-0.5706995099917445	399.87518390507284
-0.5723659705528202	401.04294880536236
-0.5740336228298204	402.2131142336389
-0.5757024663520393	403.38568314508564
-0.57737250064926	404.5606584961491
-0.5790437252517551	405.73804324453715
-0.5807161396902824	406.9178403492201
-0.5823897434960851	408.10005277042814
-0.5840645362008906	409.2846834696524
-0.5857405173369121	410.47173540964457
-0.5874176864368476	411.66121155441454
-0.5890960430338729	412.853114869232
-0.5907755866616495	414.04744832062465
-0.5924563168543189	415.2442148763788
-0.594138233146504	416.44341750553747
-0.595821335073305	417.645059178401
-0.5975056221703005	418.84914286652594
-0.5991910939735512	420.05567154272495
-0.600877750019588	421.26464818106604
-0.6025655898454235	422.4760757568724
-0.6042546129885451	423.68995724672163
-0.6059448189869129	424.9062956284444
-0.6076362073789628	426.1250938811266
-0.6093287777036017	427.3463549851049
-0.6110225295002123	428.57008192197037
-0.612717462308646	429.79627767456475
-0.6144135756692256	431.024945226982
-0.6161108691227438	432.2560875645666
-0.6178093422104657	433.48970767391364
-0.61950899447412	434.7258085428684
-0.6212098254559074	435.9643931605254
-0.622911834698492	437.2054645172276
-0.6246150217450078	438.44902560456785
-0.6263193861390521	439.6950794153861
-0.628024927424687	440.9436289437694
-0.6297316451464396	442.1946771850532
-0.6314395388492987	443.44822713581874
-0.6331486080787183	444.70428179389154
-0.6348588523806112	445.9628441583463
-0.6365702713013522	447.2239172295001
-0.6382828643877779	448.4875040089151
-0.6399966311871816	449.75360749939887
-0.6417115712473165	451.02223070500037
-0.6434276841163966	452.29337663101325
-0.6451449693430885	453.56704828397375
-0.6468634264765183	454.84324867165964
-0.6485830550662672	456.1219808030907
-0.650303854662371	457.40324768852724
-0.6520258248153207	458.68705233947196
-0.6537489650760605	459.973397768666
-0.6554732749959866	461.26228699009073
-0.65719875412695	462.55372301896756
-0.6589254020212484	463.8477088717555
-0.6606532182316365	465.144247566153
-0.662382202311313	466.44334212109493
-0.6641123538139277	467.74499555675476
-0.6658436722935827	469.04921089454234
-0.6675761573048233	470.35599115710306
-0.6693098084026414	471.6653393683203
-0.6710446251424805	472.9772585533105
-0.672780607080224	474.2917517384263
-0.6745177537722041	475.60882195125515
-0.6762560647751944	476.92847222061704
-0.677995539646414	478.2507055765669
-0.6797361779435254	479.5755250503913
-0.6814779792246313	480.9029336746109
-0.6832209430482744	482.2329344829774
-0.6849650689734441	483.5655305104744
-0.6867103565595627	484.90072479331633
-0.6884568053664964	486.2385203689494
-0.6902044149545494	487.5789202760479
-0.69195318488446	488.92192755451777
-0.6937031147174086	490.2675452454931
-0.6954542040150096	491.61577639133753
-0.697206452339314	492.9666240356421
-0.6989598592528077	494.3200912232264
-0.7007144243184109	495.6761810001369
-0.7024701470994769	497.0348964136474
-0.7042270271597945	498.39624051225786
-0.7059850640635791	499.76021634569366
-0.7077442573754867	501.1268269649067
-0.7095046066605946	502.49607542207315
-0.7112661114844184	503.8679647705937
-0.7130287714128977	505.24249806509334
-0.7147925860124059	506.6196783614212
-0.7165575548497384	507.99950871664817
-0.7183236774921274	509.38199218906936
-0.7200909535072203	510.7671318382007
-0.7218593824631004	512.1549307247807
-0.723628963928274	513.5453919107692
-0.7253996974716681	514.938518459347
-0.7271715826626393	516.334313434914
-0.7289446190709661	517.7327799030911
-0.7307188062668482	519.1339209307185
-0.7324941438209103	520.5377395858558
-0.7342706313041952	521.9442389377796
-0.7360482682881699	523.3534220569859
-0.7378270543447215	524.7652920151878
-0.7396069890461532	526.179851885316
-0.7413880719651901	527.5971047415168
-0.7431703026749755	529.0170536591538
-0.7449536807490689	530.439701714806
-0.7467382057614482	531.8650519862675
-0.7485238772865088	533.2931075525473
-0.7503106948990572	534.7238714938687
-0.7520986581743193	536.1573468916689
-0.7538877666879318	537.593536828599
-0.75567802001595	539.032444388523
-0.7574694177348372	540.4740726565168
-0.7592619594214722	541.9184247188689
-0.7610556446531447	543.3655036630794
-0.7628504730075549	544.81531257786
-0.7646464440628146	546.2678545531314
-0.7664435573974451	547.7231326800281
-0.7682418125903767	549.1811500508895
-0.7700412092209489	550.6419097592695
-0.7718417468689086	552.1054148999274
-0.773643425114409	553.5716685688315
-0.7754462435380127	555.0406738631604
-0.7772502017206856	556.5124338812961
-0.7790552992438007	557.9869517228328
-0.7808615356891353	559.4642304885672
-0.7826689106388722	560.9442732805047
-0.7844774236755939	562.4270832018543
-0.7862870743822906	563.9126633570326
-0.7880978623423521	565.4010168516608
-0.7899097871395697	566.8921467925616
-0.7917228483581393	568.3860562877659
-0.7935370455826498	569.8827484465049
-0.7953523783980989	571.3822263792149
-0.7971688463898772	572.8844931975337
-0.7989864491437758	574.3895520143021
-0.8008051862459858	575.897405943562
-0.8026250572830914	577.4080581005559
-0.8044460618420767	578.9215116017305
-0.8062681995103219	580.4377695647279
-0.8080914698756029	581.9568351083943
-0.8099158725260888	583.4787113527738
-0.8117414070503438	585.0034014191097
-0.8135680730373248	586.5309084298437
-0.8153958700763859	588.0612355086172
-0.817224797757271	589.5943857802667
-0.8190548556701113	591.1303623708285
-0.8208860434054404	592.6691684075355
-0.8227183605541704	594.2108070188142
-0.8245518067076132	595.7552813342918
-0.826386381457463	597.3025944847873
-0.8282220843958101	598.8527496023169
-0.8300589151151265	600.40574982009
-0.831896873208276	601.9615982725119
-0.8337359582685067	603.5202980951801
-0.8355761698894568	605.0818524248871
-0.8374175076651481	606.6462643996169
-0.8392599711899874	608.2135371585466
-0.8411035600587704	609.783673842046
-0.8429482738666697	611.3566775916759
-0.8447941122092482	612.9325515501884
-0.8466410746824489	614.5112988615263
-0.8484891608825974	616.0929226708224
-0.8503383704064035	617.6774261244008
-0.8521887028509526	619.2648123697738
-0.8540401578137186	620.8550845556429
-0.85589273489255	622.4482458318987
-0.8577464336856766	624.0442993496204
-0.8596012537917086	625.6432482610728
-0.8614571948096312	627.2450957197111
-0.863314256338812	628.8498448801756
-0.8651724379789895	630.4574988982918
-0.8670317393302873	632.0680609310748
-0.8688921599931979	633.6815341367217
-0.8707536995685954	635.2979216746177
-0.872616357657722	636.9172267053306
-0.8744801338622006	638.5394523906135
-0.8763450277840252	640.1646018934032
-0.8782110390255642	641.7926783778207
-0.8800781671895582	643.4236850091688
-0.8819464118791196	645.0576249539331
-0.8838157726977319	646.6945013797828
-0.8856862492492527	648.3343174555669
-0.887557841137907	649.9770763513175
-0.8894305479682914	651.6227812382466
-0.8913043693453726	653.271435288747
-0.8931793048744837	654.9230416763917
-0.8950553541613281	656.5776035759321
-0.8969325168119762	658.2351241633023
-0.8988107924328665	659.89560661561
-0.9006901806308045	661.5590541111467
-0.9025706810129586	663.2254698293773
-0.9044522931868682	664.8948569509477
-0.9063350167604319	666.5672186576785
-0.9082188513419186	668.2425581325681
-0.9101037965399568	669.920878559792
-0.9119898519635402	671.602183124699
-0.9138770172220251	673.2864750138167
-0.9157652919251293	674.9737574148443
-0.9176546756829342	676.6640335166591
-0.9195451681058805	678.3573065093091
-0.9214367688047737	680.053579584019
-0.9233294773907728	681.752855933185
-0.9252232934754019	683.4551387503775
-0.9271182166705426	685.1604312303385
-0.9290142465884343	686.8687365689811
-0.9309113828416763	688.5800579633933
-0.9328096250432238	690.2943986118319
-0.9347089728063889	692.011761713725
-0.9366094257448411	693.7321504696711
-0.9385109834726069	695.4555680814398
-0.9404136456040654	697.1820177519683
-0.9423174117539521	698.9115026853643
-0.9442222815373583	700.644026086905
-0.9461282545697257	702.3795911630341
-0.948035330466853	704.118201121366
-0.9499435088448889	705.859859170678
-0.9518527893203385	707.6045685209207
-0.9537631715100522	709.3523323832063
-0.955674655031237	711.1031539698165
-0.9575872395014499	712.8570364941971
-0.9595009245385934	714.6139831709592
-0.9614157097609275	716.3739972158816
-0.9633315947870572	718.137081845904
-0.9652485792359341	719.9032402791345
-0.9671666627268608	721.6724757348408
-0.9690858448794888	723.4447914334584
-0.9710061253138126	725.2201905965821
-0.9729275036501783	726.9986764469713
-0.9748499795092733	728.7802522085476
-0.9767735525121338	730.5649211063931
-0.9786982222801414	732.3526863667546
-0.9806239884350189	734.1435512170348
-0.9825508505988375	735.9375188858022
-0.9844788083940093	737.734592602782
-0.9864078614432913	739.5347755988613
-0.98833800936978	741.3380711060854
-0.9902692517969182	743.1444823576577
-0.9922015883484878	744.9540125879437
-0.9941350186486111	746.7666650324628
-0.9960695423217547	748.5824429278955
-0.9980051589927195	750.4013495120779
-0.9999418682866528	752.2233880240044
-1.001879669829035	754.0485617038235
-1.0038185632456915	755.8768737928441
-1.005758548162779	757.7083275335268
-1.0076996242067948	759.5429261694886
-1.0096417910045754	761.3806729455042
-1.011585048183292	763.2215711074988
-1.0135293953704516	765.0656239025546
-1.0154748321938993	766.9128345789059
-1.0174213582818126	768.7632063859438
-1.0193689732627054	770.6167425742076
-1.0213176767654246	772.4734463953909
-1.0232674684191514	774.3333211023423
-1.025218347853403	776.1963699490583
-1.0271703146980247	778.0625961906898
-1.0291233685831966	779.9320030835349
-1.0310775091394337	781.8045938850485
-1.033032735997575	783.6803718538288
-1.0349890487887972	785.5593402496289
-1.0369464471446057	787.4415023333488
-1.0389049306968325	789.3268613670378
-1.0408644990776443	791.2154206138954
-1.0428251519195302	793.1071833382672
-1.0447868888553171	795.0021528056482
-1.0467497095181524	796.9003322826798
-1.0487136135415134	798.8017250371521
-1.0506786005592037	800.7063343379992
-1.0526446702053553	802.6141634553045
-1.0546118221144263	804.5252156602957
-1.0565800559212	806.4394942253448
-1.0585493712607827	808.3570024239721
-1.0605197677686087	810.2777435308391
-1.0624912450804354	812.2017208217552
-1.0644638028323445	814.1289375736696
-1.0664374406607413	816.0593970646796
-1.0684121582023527	817.9931025740225
-1.0703879550942286	819.930057382079
-1.0723648309737428	821.8702647703727
-1.074342785478586	823.813728021568
-1.0763218182467778	825.7604504194741
-1.0783019289166509	827.710435249037
-1.0802831171268612	829.6636857963474
-1.0822653825163835	831.6202053486327
-1.0842487247245147	833.5799971942646
-1.0862331433908676	835.5430646227521
-1.0882186381553745	837.5094109247416
-1.090205208658286	839.4790393920233
-1.0921928545401662	841.451953317521
-1.0941815754419042	843.4281559953006
-1.0961713710046976	845.4076507205616
-1.0981622408700673	847.3904407896459
-1.100154184679844	849.3765295000276
-1.1021472020761751	851.3659201503212
-1.104141292701526	853.3586160402747
-1.1061364561986708	855.3546204707725
-1.1081326922107035	857.3539367438364
-1.1101300003810288	859.3565681626209
-1.1121283803533641	861.3625180314162
-1.1141278317717378	863.3717896556459
-1.1161283542804947	865.38438634187
-1.118129947524288	867.4003113977799
-1.120132611148084	869.4195681321996
-1.1221363447971593	871.4421598550878
-1.1241411481170978	873.4680898775345
-1.1261470207537996	875.4973615117628
-1.1281539623534682	877.5299780711255
-1.1301619725626222	879.5659428701084
-1.1321710510280822	881.6052592243279
-1.1341811973969806	883.6479304505305
-1.1361924113167599	885.693959866593
-1.1382046924351643	887.7433507915216
-1.1402180404002507	889.7961065454533
-1.142232454860378	891.8522304496508
-1.1442479354642132	893.911725826511
-1.146264481860729	895.9745959995529
-1.1482820936992042	898.0408442934279
-1.1503007706292179	900.1104740339123
-1.1523205123006606	902.1834885479117
-1.1543413183637223	904.2598911634568
-1.156363188468895	906.339685209704
-1.1583861222669776	908.4228740169389
-1.1604101194090697	910.5094609165694
-1.1624351795465742	912.5994492411297
-1.1644613023311952	914.6928423242799
-1.1664884874149366	916.7896435008047
-1.1685167344501068	918.889856106611
-1.1705460430893104	920.9934834787305
-1.1725764129854575	923.1005289553196
-1.1746078437917526	925.2109958756548
-1.1766403351617036	927.3248875801397
-1.1786738867491142	929.4422074102949
-1.1807084982080898	931.5629587087681
-1.1827441691930298	933.6871448193232
-1.1847808993586355	935.8147690868503
-1.1868186883599048	937.9458348573581
-1.188857535852126	940.0803454779744
-1.1908974414908933	942.2183042969506
-1.1929384049320917	944.3597146636531
-1.1949804258319028	946.5045799285726
-1.1970235038468027	948.6529034433145
-1.1990676386335635	950.804688560607
-1.20111282984925	952.9599386342917
-1.2031590771512235	955.1186570193328
-1.205206380197137	957.2808470718095
-1.2072547386449362	959.4465121489177
-1.2093041521528634	961.6156556089705
-1.2113546203794467	963.7882808113998
-1.213406142983513	965.9643911167498
-1.2154587196241742	968.1439898866822
-1.2175123499608398	970.3270804839759
-1.2195670336532063	972.5136662725207
-1.2216227703612614	974.7037506173243
-1.223679559745282	976.8973368845074
-1.2257374014658344	979.0944284413026
-1.2277962951837773	981.2950286560622
-1.229856240560254	983.4991408982432
-1.2319172372567004	985.706768538423
-1.2339792849348357	987.9179149482859
-1.2360423832566692	990.1325835006319
-1.2381065318844982	992.3507775693698
-1.2401717304809037	994.572500529522
-1.2422379787087583	996.7977557572209
-1.2443052762312157	999.02654662971
-1.2463736227117166	1001.2588765253424
-1.2484430178139887	1003.4947488235813
-1.250513461202043	1005.7341669050004
-1.2525849525401755	1007.9771341512803
-1.2546574914929665	1010.223653945213
-1.2567310777252776	1012.4737296706979
-1.2588057109022561	1014.7273647127405
-1.260881390689333	1016.9845624574588
-1.262958116752221	1019.2453262920737
-1.2650358887569142	1021.5096596049154
-1.2671147063696873	1023.7775657854188
-1.2691945692571007	1026.049048224128
-1.2712754770859909	1028.3241103126918
-1.2733574295234762	1030.6027554438629
-1.2754404262369599	1032.8849870115012
-1.2775244668941197	1035.1708084105705
-1.2796095511629133	1037.4602230371418
-1.28169567871158	1039.7532342883853
-1.2837828492086378	1042.04984556258
-1.285871062322878	1044.3500602591043
-1.2879603177233792	1046.6538817784437
-1.2900506150794884	1048.9613135221834
-1.292141954060833	1051.2723588930114
-1.294234334337321	1053.5870212947195
-1.2963277555791304	1055.905304132199
-1.2984222174567226	1058.227210811445
-1.3005177196408277	1060.5527447395505
-1.302614261802455	1062.8819093247137
-1.3047118436128886	1065.214707976227
-1.306810464743687	1067.5511441044885
-1.3089101248666823	1069.8912211209927
-1.311010823653982	1072.2349424383335
-1.313112560777963	1074.5823114702055
-1.3152153359112808	1076.9333316313991
-1.3173191487268625	1079.2880063378072
-1.3194239988979026	1081.646339006414
-1.3215298860978768	1084.0083330553089
-1.3236368100005236	1086.3739919036723
-1.3257447702798555	1088.7433189717838
-1.3278537666101595	1091.1163176810212
-1.3299637986659898	1093.4929914538538
-1.3320748661221717	1095.8733437138521
-1.3341869686538013	1098.2573778856774
-1.3363001059362427	1100.6450973950898
-1.338414277645128	1103.0365056689398
-1.340529483456362	1105.4316061351778
-1.3426457230461166	1107.8304022228442
-1.3447629960908287	1110.2328973620722
-1.3468813022672077	1112.6390949840932
-1.3490006412522242	1115.0489985212262
-1.3511210127231246	1117.4626114068876
-1.3532424163574144	1119.8799370755821
-1.3553648518328685	1122.3009789629086
-1.3574883188275266	1124.7257405055582
-1.3596128170196962	1127.154225141311
-1.3617383460879469	1129.5864363090393
-1.3638649057111152	1132.0223774487056
-1.3659924955683025	1134.462052001365
-1.3681211153388735	1136.9054634091572
-1.370250764702457	1139.352615115318
-1.372381443338945	1141.8035105641657
-1.3745131509284942	1144.2581532011145
-1.376645887151521	1146.7165464726618
-1.378779651688708	1149.1786938263933
-1.3809144442209964	1151.6445987109873
-1.383050264429592	1154.1142645762047
-1.3851871119959605	1156.5876948728958
-1.3873249866018278	1159.064893052997
-1.3894638879291834	1161.5458625695323
-1.391603815660276	1164.0306068766092
-1.393744769477612	1166.5191294294254
-1.3958867490639617	1169.0114336842605
-1.398029754102349	1171.5075230984787
-1.4001737842760633	1174.0074011305333
-1.4023188392686496	1176.5110712399567
-1.4044649187639107	1179.0185368873704
-1.4066120224459067	1181.5298015344756
-1.4087601499989588	1184.044868644061
-1.4109093011076426	1186.5637416799916
-1.4130594754567922	1189.0864241072243
-1.4152106727314964	1191.6129193917925
-1.4173628926171007	1194.143231000811
-1.4195161347992107	1196.6773624024815
-1.4216703989636805	1199.2153170660813
-1.4238256847966273	1201.757098461973
-1.4259819919844168	1204.3027100615982
-1.428139320213674	1206.8521553374796
-1.4302976691712743	1209.405437763219
-1.4324570385443482	1211.9625608134972
-1.434617428020283	1214.523527964079
-1.436778837286716	1217.0883426918024
-1.4389412660315375	1219.6570084745879
-1.4411047139428916	1222.2295287914328
-1.4432691807091773	1224.8059071224136
-1.445434666019038	1227.3861469486828
-1.447601169561376	1229.9702517524736
-1.4497686910253444	1232.5582250170937
-1.451937230100341	1235.1500702269252
-1.454106786476023	1237.745790867434
-1.45627735984229	1240.3453904251542
-1.4584489498892979	1242.9488723877002
-1.4606215563074485	1245.5562402437604
-1.4627951787873943	1248.1674974830999
-1.4649698170200365	1250.782647596555
-1.4671454706965275	1253.4016940760416
-1.4693221395082627	1256.0246404145453
-1.4714998231468914	1258.6514901061253
-1.4736785213043064	1261.2822466459197
-1.4758582336726496	1263.916913530133
-1.4780389599443116	1266.5554942560477
-1.4802206998119267	1269.1979923220144
-1.4824034529683783	1271.8444112274613
-1.484587219106797	1274.4947544728825
-1.4867719979205531	1277.149025559846
-1.4889577891032681	1279.8072279909936
-1.4911445923488094	1282.4693652700337
-1.4933324073512855	1285.1354409017488
-1.4955212338050508	1287.8054583919877
-1.4977110714047048	1290.4794212476725
-1.499901919845091	1293.1573329767934
-1.502093778821295	1295.8391970884115
-1.5042866480286479	1298.5250170926545
-1.5064805271627237	1301.2147965007166
-1.508675415919336	1303.908538824867
-1.510871313994543	1306.6062475784363
-1.5130682210846464	1309.307926275828
-1.5152661368861882	1312.0135784325075
-1.5174650610959508	1314.7232075650109
-1.5196649934109612	1317.4368171909387
-1.5218659335284819	1320.1544108289618
-1.5240678811460215	1322.8759919988115
-1.5262708359613248	1325.6015642212872
-1.5284747976723787	1328.3311310182548
-1.530679765977411	1331.0646959126436
-1.5328857405748835	1333.802262428449
-1.5350927211635033	1336.5438340907285
-1.5373007074422118	1339.2894144256068
-1.5395096991101904	1342.0390069602688
-1.541719695866859	1344.7926152229654
-1.5439306974118756	1347.5502427430097
-1.546142703445134	1350.3118930507776
-1.5483557136667663	1353.077569677707
-1.5505697277771429	1355.8472761562984
-1.5527847454768668	1358.6210160201153
-1.5550007664667822	1361.3987928037784
-1.5572177904479656	1364.1806100429767
-1.5594358171217293	1366.9664712744527
[truncated: 8,000 more rows]
