# Supplementary material for: Critical Phenomena of Charged AdS Black Holes in Rastall Gravity
Source: Hindawi journal article supplement (doi:10.1155/2020/4065254), 2020-01-24
Supplement: f1 [file 4065254.f1.zip › Fig5(b)-GT5.dat]

-3175.138187920442	3.002499697736491
-393.9027402342974	1.5049976386071486
-115.23147173195864	1.0074921694902104
-47.73528434746328	0.7599817075466635
-23.85938264852698	0.6124647234025562
-13.393795251329252	0.5149397322798792
-8.124277534740546	0.4459767168296737
-5.200637761632706	0.3948599801772947
-3.4580296826025196	0.35563576186074736
-2.3606497905298833	0.32473128298997134
-1.6389201096409851	0.2998724931583528
-1.1473074250745146	0.2795429432265598
-0.8026475112975815	0.2626924086065289
-0.5551358416254629	0.24857038786494373
-0.373750355186583	0.2366262015480388
-0.2385114283203639	0.22644655366920918
-0.1361758744987931	0.2177151300865392
-0.05774352578247524	0.2101856638916609
0.0030376513671403482	0.20366350629777974
0.05059549334704392	0.1979927261169369
0.08812026243211912	0.19304689497549507
0.11794612614991958	0.18872238554291437
0.1418046076066432	0.18493341795198745
0.16099625755855965	0.1816083445283363
0.17650898492795994	0.17868682610849376
0.18910092656195032	0.17611765990854086
0.1993593312746908	0.17385709002712835
0.20774296073269932	0.17186747992804186
0.21461299691943408	0.17011625953120535
0.220255827225082	0.16857508283967762
0.2249000178701477	0.16721914856476588
0.22872908094655342	0.16602664809563358
0.2318911642662916	0.1649783138028984
0.23450646757396806	0.16405704702096857
0.2366729631690666	0.16324760977493102
0.23847084098680693	0.16253636785861575
0.23996598628054833	0.1619110755500062
0.24121271797546323	0.1613606942950923
0.24225595791563528	0.16087523926429242
0.2431329590567811	0.16044564890467378
0.24387468965274522	0.1600636735627064
0.24450694750517718	0.15972177999989878
0.2450512611849733	0.1594130692148068
0.24552562222544072	0.15913120545513754
0.24594508251046163	0.15887035467985874
0.24632224362809024	0.15862513103381412
0.2466676592434478	0.1583905501419936
0.24699016713415659	0.1581619882293881
0.24729716410941194	0.15793514623463106
0.247594834364376	0.15770601821869187
0.24788833972867508	0.15747086347947264
0.24818197861886224	0.1572261818737773
0.24847931919951763	0.1569686919233563
0.24878331121992245	0.15669531134442374
0.24909638016462304	0.1564031396924809
0.24942050669184337	0.15608944285829135
0.24975729379894313	0.1557516391879144
0.25010802372205465	0.15538728703101545
0.2504737062266691	0.15499407354820888
0.25085511966084817	0.1545698046307455
0.2512528459099654	0.15411239580508446
0.2516673002012316	0.1536198640113301
0.2520987565496067	0.15309032015860186
0.25254736950761536	0.1525219623725175
0.2530131927748972	0.15191306986040046
0.2534961951349114	0.1512619973288352
0.25399627411274794	0.1505671698959932
0.25451326768679683	0.14982707844792265
0.25504696433591234	0.1490402753938782
0.2555971116609203	0.14820537078090026
0.25616342378341456	0.14732102873232916
0.2567455876945969	0.1463859641788616
0.25734326870146884	0.14539893985419292
0.25795611509620076	0.14435876353030708
0.2585837621563177	0.14326428547013345
0.2592258355679312	0.1421143960776325
0.25988195435115197	0.1409080237274394
0.26055173335567827	0.13964413275802717
0.26123478538506184	0.13832172161397027
0.2619307230000427	0.13693982112433079
0.2626391600444162	0.13549749290546786
0.2633597129309545	0.1339938278777113
0.26409200171981495	0.13242794488635495
0.2648356510174916	0.1307989894183334
0.2655902907206058	0.12910613240675606
0.2663555566255885	0.1273485691161997
0.26713109092251675	0.12552551810231105
0.267916542588949	0.12363622023985596
0.2687115676975237	0.12167993781387698
0.26951582964927795	0.11965595366909632
0.27032899934307925	0.11756357041312315
0.2711507552902111	0.11540210966941467
0.2719807836819743	0.11317091137628232
0.27281877841714297	0.11086933312855352
0.2736644410952291	0.10849674955878028
0.2745174809807328	0.10605255175514622
0.27537761494288454	0.10353614671345746
0.2762445673747972	0.10094695682081276
0.277118070095436	0.09828441936874616
0.2779978622373666	0.09554798609380724
0.27888369012285347	0.09273712274370641
0.2797753071305387	0.08985130866729768
0.28067247355463687	0.08689003642680676
0.28157495645831887	0.08385281143083217
0.28248252952273345	0.08073915158675807
0.28339497289291493	0.07754858697132352
0.28431207302165235	0.07428065951818111
0.2852336225122443	0.07093492272136642
0.28615941996093075	0.06751094135367997
0.287089269799676	0.06400829119905074
0.2880229821398777	0.060426558798022445
0.28896037261748736	0.056765341205559094
0.2899012622399482	0.0530242457604288
0.2908454772352938	0.04920288986547011
0.2917928489036865	0.04530090077809806
0.2927432134716272	0.041317915410449046
0.29369641194902174	0.03725358013860336
0.294652289989251	0.03310755062036391
0.2956106977523568	0.028879491621104092
0.29657148977142894	0.0245690768472262
0.2975345248222505	0.020175988786809984
0.29849966579623993	0.015699918557047443
0.2994667795767062	0.011140565758095078
0.3004357369184205	0.006497638332994493
0.301406412330492	0.001770852433332415
0.30237868396252454	-0.003040067709664418
0.30335243349402097	-0.007935389908885204
0.30432754602699347	-0.012915374140216596
0.30530390998173157	-0.017980272656796248
0.30628141699567313	-0.023130330098881824
0.3072599618253201	-0.02836578359955466
0.3082394422511363	-0.03368686288647166
0.30921975898536047	-0.039093790379860716
0.31020081558266904	-0.04458678128694604
0.3111825183536168	-0.05016604369298
0.31216477628078637	-0.05583177864904598
0.31314750093757465	-0.06158418025678619
0.3141306064095453	-0.06742343575020537
0.31511400921827454	-0.07334972557468378
0.31609762824762033	-0.07936322346333463
0.317081384672344	-0.08546409651082731
0.3180652018890146	-0.09165250524479318
0.31904900544912695	-0.09792860369492551
0.32003272299436575	-0.10429253945987671
0.32101628419394945	-0.11074445377205167
0.32199962068398946	-0.11728448156039212
0.32298266600879877	-0.12391275151123876
0.3239653555640902	-0.13062938612735597
0.32494762654200243	-0.13743450178519778
0.3259294178778934	-0.14432820879049246
0.32691067019884634	-0.1513106114322142
0.3278913257738292	-0.15838180803501356
0.32887132846545425	-0.1655418910101658
0.32985062368328616	-0.17279094690510383
0.33082915833864446	-0.18012905645159172
0.3318068808008527	-0.18755629461259032
0.3327837408548853	-0.1950727306278754
0.33375968966036484	-0.20267842805845127
0.33473467971186505	-0.21037344482980774
0.3357086648004753	-0.21815783327407418
0.3366815999765841	-0.2260316401711
0.3376534415138407	-0.23399490678851492
0.3386241468742551	-0.2420476689208017
0.33959367467439744	-0.2501899569274195
0.34056198465266085	-0.25842179577001473
0.3415290376375503	-0.2667432050487515
0.34249479551696477	-0.27515419903779736
0.34345922120843714	-0.28365478671999045
0.3444222786303011	-0.2922449718207203
0.3453839326737538	-0.30092475284105313
0.3463441491757819	-0.30969412309011995
0.3473028948929262	-0.31855307071680583
0.3482601374758522	-0.3275015787407512
0.3492158454447022	-0.33653962508270063
0.35016998816520273	-0.3456671825942128
0.3511225358255009	-0.3548842190867605
0.3520734594137057	-0.3641906973602335
0.35302273069611206	-0.37358657523087024
0.35397032219608304	-0.3830718055586359
0.3549162071735689	-0.3926463362740643
0.3558603596052441	-0.4023101104045767
0.3568027541652375	-0.41206306610030596
0.35774336620644	-0.4219051366594264
0.35868217174237	-0.4318362505530199
0.35961914742957624	-0.4418563314494816
0.3605542705505619	-0.45196529823848325
0.36148751899721443	-0.46216306505451193
0.3624188712547217	-0.4724495412999878
0.3633483063859598	-0.4828246316679861
0.36427580401633874	-0.49328823616456086
0.36520134431908924	-0.503840250130694
0.3661249080009763	-0.5144805642638755
0.3670464762884283	-0.5252090646393226
0.3679660309140648	-0.5360256327308597
0.36888355410361384	-0.5469301454314504
0.3697990285632032	-0.5579224750734119
0.370712437467015	-0.5690024894483031
0.37162376444529394	-0.5801700518265073
0.3725329935726945	-0.591425020976514
0.3734401093569581	-0.6027672511839007
0.3743450967279116	-0.614196592270043
0.37524794102677367	-0.6257128896105334
0.37614862799576154	-0.6373159841533369
0.3770471437679892	-0.6490057124366853
0.37794347485764573	-0.6607819066067087
0.37883760815044726	-0.6726443944348222
0.3797295308943534	-0.6845929993348734
0.3806192306905393	-0.6966275403800397
0.38150669548461724	-0.7087478323195116
0.382391913558097	-0.720953685594933
0.3832748735200818	-0.7332449063566392
0.3841555642991893	-0.7456212964796658
0.38503397513569193	-0.7580826535795588
0.3859100955738709	-0.7706287710279732
0.38678391545457635	-0.7832594379680773
0.3876554249079866	-0.7959744393297586
0.38852461434656294	-0.8087735558446447
0.38939147445819233	-0.8216565640609306
0.3902559961995129	-0.8346232363580358
0.391118170789416	-0.8476733409610703
0.3919779897027224	-0.8608066419551406
0.3928354446640228	-0.8740228992994753
0.39369052764168266	-0.8873218688413947
0.3945432308420033	-0.9007033023301092
0.39539354670353577	-0.9141669474303676
0.3962414678915436	-0.9277125477359415
0.3970869872926091	-0.9413398427829691
0.39793009800937923	-0.9550485680631369
0.3987707933554478	-0.9688384550367272
0.39960906685036934	-0.9827092311455176
0.4004449122148008	-0.9966606198255461
0.40127832336576796	-1.0106923405197277
0.402109294412053	-1.0248041086903505
0.40293781964969866	-1.0389956358314407
0.40376389355762715	-1.0532666294809783
0.40458751079336974	-1.0676167932330167
0.40540866618890414	-1.0820458267496567
0.406227354746597	-1.0965534257729093
0.40704357163524707	-1.1111392821364348
0.4078573121862287	-1.1258030837771722
0.4086685718897309	-1.1405445147468396
0.40947734639108924	-1.1553632552233446
0.4102836314872103	-1.1702589815220614
0.41108742312308333	-1.185231366107019
0.41188871738837796	-1.2002800776019686
0.4126875105141261	-1.215404780801357
0.41348379886948505	-1.230605136681188
0.4142775789585792	-1.2458808024097994
0.41506884741741973	-1.2612314313585153
0.4158576010108985	-1.2766566731122326
0.4166438366298547	-1.2921561734798845
0.41742755128821296	-1.30772957450483
0.4182087421201902	-1.323376514475133
0.41898740637756954	-1.3390966279337773
0.41976354142704	-1.3548895456887602
0.4205371447475996	-1.3707548948231243
0.42130821392801987	-1.3866922987048884
0.42207674666437195	-1.4027013769969074
0.4228427407576099	-1.418781745666631
0.4236061941112123	-1.434933016995795
0.4243671047288797	-1.4511547995900251
0.4251254707122846	-1.4674466983883647
0.4258812902588766	-1.483808314672723
0.4266345616597367	-1.5002392460772431
0.42738528329748376	-1.5167390865976076
0.4281334536442281	-1.5333074266002429
0.42887907125957414	-1.5499438528314833
0.4296221347886676	-1.5666479484266336
0.4303626429602896	-1.583419292918987
0.43110059458499356	-1.6002574622487433
0.43183598855328564	-1.6171620287718897
0.43256882383384637	-1.6341325612689812
0.4332990994717943	-1.651168624953888
0.4340268145869866	-1.6682697814824445
0.434751968372362	-1.6854355889610586
0.4354745600923185	-1.7026656019552389
0.43619458908112885	-1.719959371498068
0.4369120547413927	-1.7373164450986118
0.4376269565425226	-1.7547363667502676
0.4383392940192641	-1.7722186769390473
0.43904906677024996	-1.7897629126518093
0.4397562744565862	-1.8073686073844142
0.4404609168004695	-1.825035291149853
0.44116299358383654	-1.842762490486284
0.4418625046470419	-1.8605497284650268
0.4425594498875666	-1.878396524698512
0.4432538292587548	-1.8963023953481604
0.4439456427685781	-1.9142668531322071
0.44463489047842764	-1.9322894073334864
0.44532157250193316	-1.9503695638071499
0.44600568900380655	-1.9685068249883306
0.4466872401987121	-1.9867006898997763
0.44736622635016116	-2.0049506541593995
0.4480426477694307	-2.0232562099878075
0.44871650481450553	-2.0416168462157667
0.4493877978890439	-2.060032048291612
0.4500565274413646	-2.0785012982886304
0.45072269396345704	-2.0970240749123716
0.45138629799001206	-2.1155998535079257
0.4520473400974741	-2.1342281060671473
0.45270582090311323	-2.1529083012358416
0.453361741064118	-2.1716399043208994
0.45401510127670625	-2.190422377297382
0.4546659022752567	-2.2092551788155674
0.4553141448314582	-2.228137764207955
0.4559598297534763	-2.247069585496227
0.45660295788513955	-2.2660500913981445
0.4572435301051413	-2.2850787273344437
0.4578815473262593	-2.3041549354356516
0.4585170104945914	-2.323278154548871
0.4591499205888078	-2.3424478202445433
0.4597802786194189	-2.3616633648231335
0.4604080856280581	-2.3809242173218177
0.4610333426867807	-2.4002298035210883
0.46165605089737627	-2.419579545951359
0.46227621139069636	-2.4389728638994996
0.4628938253259958	-2.4584091734153577
0.4635088938902883	-2.477887887318205
0.46412141829771403	-2.497408415203215
0.4647313997889227	-2.516970163447807
0.4653388396304667	-2.5365725352180437
0.4659437391142096	-2.5562149304749355
0.46654609955674453	-2.5758967459807423
0.46714592229882557	-2.595617375305194
0.467743208704812	-2.6153762088317514
0.4683379601621212	-2.635172633763741
0.46893017808069604	-2.6550060341305257
0.4695198638924804	-2.67487579079362
0.470107019050907	-2.6947812814527543
0.470691645030396	-2.71472188065192
0.47127374332586264	-2.734696959785386
0.4718533154522356	-2.7547058871036727
0.4724303629439851	-2.774748027719502
0.4730048873546608	-2.7948227436137065
0.4735768902564385	-2.814929393641099
0.47414637323967695	-2.835067333536347
0.4747133379124827	-2.855235915919768
0.47527778590028497	-2.8754344903031237
0.47583971884541704	-2.8956624030953795
0.47639913840670806	-2.9159189976084225
0.47695604625908283	-2.9362036140627694
0.4775104440931691	-2.956515589593203
0.47806233361491246	-2.9768542582544577
0.47861171654519935	-2.9972189510267677
0.4791585946194884	-3.0176089958214907
0.47970296958744774	-3.0380237174866376
0.4802448432126008	-3.0584624378123824
0.48078421727197856	-3.078924475536579
0.48132109355577873	-3.099409146350196
0.48185547386703187	-3.1199157629027856
0.48238736002127447	-3.1404436348078604
0.48291675384622784	-3.160992068648296
0.4834436571814839	-3.181560367981679
0.48396807187819757	-3.2021478333456255
0.48448999979878427	-3.222753762263097
0.48500944281662406	-3.243377449247669
0.48552640281577186	-3.264018185808773
0.4860408816906723	-3.284675260456931
0.48655288134588165	-3.30534795870895
0.48706240369579523	-3.326035563093079
0.4875694506643781	-3.3467373531541824
0.4880740241849034	-3.3674526054588356
0.4885761261996949	-3.3881805936004388
0.48907575865987435	-3.4089205882042846
0.4895729235251151	-3.429671856932603
0.49006762276339844	-3.450433664489589
0.4905598583507766	-3.471205272626405
0.4910496322711398	-3.491985940146154
0.4915369465159871	-3.5127749229088296
0.4920218030842035	-3.533571473836245
0.49250420398183964	-3.5543748429169613
0.49298415122189615	-3.5751842772111337
0.4934616468241139	-3.5959990208554
0.4939366928147661	-3.6168183150677167
0.4944092912264552	-3.637641398152156
0.4948794440979148	-3.6584675055037272
0.4953471534738144	-3.6792958696131235
0.4958124214045677	-3.7001257200714943
0.49627524994614586	-3.720956283575144
0.4967356411598933	-3.7417867839302783
0.497193597112347	-3.762616442057649
0.49764911987506066	-3.7834444759972463
0.49810221152443146	-3.8042701009129343
0.4985528741415291	-3.8250925290970743
0.49900110981193074	-3.845910969975115
0.4994469206255562	-3.8667246301101947
0.4998903086765085	-3.8875327132076793
0.5003312760629177	-3.9083344201197363
0.5007698248867853	-3.9291289488498067
0.5012059572538347	-3.9499154945571564
0.501639675273362	-3.9706932495613256
0.5020709810580919	-3.991461403346604
0.5024998767240346	-4.012219142566463
0.5029263643903474	-4.032965651047993
0.5033504461791961	-4.0537001097962895
0.5037721242156229	-4.074421696998854
0.5041914006274132	-4.09512958802996
0.5046082775449674	-4.11582295545498
0.5050227571011743	-4.136500969034731
0.5054348414312878	-4.157162795729796
0.5058445326728038	-4.177807599704784
0.5062518329653428	-4.198434542332641
0.5066567444505313	-4.219042782198873
0.5070592692718888	-4.239631475105792
0.5074594095747141	-4.260199774076765
0.507857167505976	-4.280746829360376
0.5082525452142059	-4.30127178843464
0.5086455448493894	-4.321773796011147
0.5090361685628658	-4.342251994039244
0.5094244185072234	-4.3627055217101285
0.5098102968362023	-4.3831335154609885
0.5101938057045942	-4.403535108979122
0.510574947268148	-4.423909433205965
0.5109537236834758	-4.44425561634122
0.5113301371079594	-4.464572783846849
0.5117041896996617	-4.484860058451145
0.5120758836172363	-4.505116560152738
0.5124452210198426	-4.5253414062245785
0.5128122040670591	-4.545533711217953
0.5131768349188002	-4.565692586966424
0.5135391157352357	-4.585817142589807
0.5138990486767087	-4.605906484498079
0.5142566359036582	-4.62595971639533
0.5146118795765426	-4.6459759392836455
0.514964781855762	-4.665954251467
0.5153153449015873	-4.685893748555148
0.5156635708740839	-4.70579352346747
0.5160094619330448	-4.7256526664368135
0.5163530202379172	-4.745470265013336
0.516694247947737	-4.7652454040683
0.5170331472210602	-4.784977165797894
0.5173697202158978	-4.804664629726997
0.517703969089652	-4.824306872712971
0.5180358959990525	-4.8439029689494015
0.5183655031000952	-4.863451989969828
0.5186927925479825	-4.882953004651514
0.5190177664970619	-4.902405079219104
0.5193404271007707	-4.921807277248353
0.5196607765115769	-4.941158659669821
0.5199788168809251	-4.960458284772506
0.5202945503591812	-4.979705208207542
0.5206079790955787	-4.998898482991821
0.5209191052381669	-5.0180371595116116
0.5212279309337593	-5.037120285526201
0.521534458327884	-5.05614690617146
0.5218386895647334	-5.075116063963487
0.5221406267871171	-5.094026798802125
0.522440272136414	-5.112878147974552
0.5227376277525264	-5.131669146158833
0.523032695773835	-5.150398825427438
0.5233254783371539	-5.169066215250779
0.5236159775776883	-5.187670342500721
0.5239041956289912	-5.206210231454055
0.5241901346229217	-5.224684903796019
0.5244737966896055	-5.243093378623732
0.5247551839573934	-5.2614346724496786
0.5250342985528238	-5.279707799205139
0.525311142600584	-5.297911770243628
0.5255857182234727	-5.316045594344321
0.5258580275423634	-5.33410827771546
0.5261280726761691	-5.352098823997746
0.5263958557418075	-5.370016234267705
0.5266613788541654	-5.387859507041111
0.5269246441260671	-5.405627638276291
0.527185653668241	-5.423319621377515
0.5274444095892861	-5.440934447198293
0.5277009139956435	-5.45847110404473
0.5279551689915634	-5.475928577678833
0.5282071766790759	-5.493305851321803
0.5284569391579627	-5.510601905657326
0.5287044585257267	-5.5278157188348445
0.5289497368775655	-5.544946266472857
0.5291927763063432	-5.5619925216621064
0.5294335789025646	-5.578953454968916
0.5296721467543477	-5.595828034438324
0.5299084819473997	-5.612615225597386
0.5301425865649914	-5.629313991458324
0.5303744626879319	-5.6459232925217595
0.530604112394547	-5.662442086779893
0.5308315377606538	-5.678869329719682
0.5310567408595397	-5.695203974325986
0.5312797237619392	-5.711444971084788
0.531500488536013	-5.7275912679862255
0.5317190372473259	-5.743641810527832
0.5319353719588277	-5.759595541717596
0.5321494947308318	-5.775451402077128
0.5323614076209966	-5.791208329644695
0.5325711126843053	-5.806865259978339
0.532778611973049	-5.822421126158993
0.5329839075368061	-5.837874858793507
0.533187001422428	-5.853225386017728
0.5333878956740171	-5.868471633499551
0.5335865923329152	-5.88361252444193
0.5337830934376837	-5.898646979585941
0.5339774010240879	-5.91357391721383
0.534169517125084	-5.92839225315193
0.5343594437707999	-5.943100900773736
0.5345471829885247	-5.957698771002882
0.5347327368026913	-5.972184772316115
0.5349161072348638	-5.986557810746227
0.5350972963037244	-6.000816789885102
0.535276306025058	-6.014960610886597
0.5354531384117431	-6.028988172469477
0.5356277954737354	-6.042898370920408
0.5358002792180584	-6.056690100096816
0.535970591648791	-6.07036225142984
0.5361387347670549	-6.083913713927229
0.5363047105710056	-6.0973433741762
0.5364685210558204	-6.110650116346373
0.5366301682136877	-6.123832822192632
0.5367896540337979	-6.136890371057948
0.536946980502333	-6.149821639876309
0.5371021496024576	-6.162625503175483
0.5372551633143091	-6.175300833079946
0.5374060236149892	-6.187846499313657
0.5375547324785558	-6.200261369202883
0.5377012918760138	-6.212544307678997
0.5378457037753078	-6.224694177281324
0.5379879701413139	-6.236709838159943
0.5381280929358326	-6.248590148078355
0.5382660741175816	-6.2603339624164205
0.5384019156421886	-6.27194013417302
0.5385356194621851	-6.283407513968853
0.538667187526999	-6.294734950049181
0.5387966217829505	-6.305921288286532
0.5389239241732434	-6.316965372183535
0.5390490966379613	-6.327866042875539
0.5391721411140621	-6.338622139133358
0.5392930595353718	-6.3492324973660335
0.5394118538325805	-6.359695951623451
0.5395285259332371	-6.3700113335990745
0.5396430777617449	-6.380177472632676
0.5397555112393568	-6.390193195712884
0.5398658282841724	-6.400057327479993
0.5399740308111326	-6.409768690228527
0.5400801207320172	-6.419326103909904
0.5401840999554406	-6.42872838613513
0.5402859703868478	-6.437974352177363
0.5403857339285133	-6.447062814974613
0.540483392479537	-6.4559925851322495
0.5405789479358404	-6.464762470925781
0.540672402190166	-6.473371278303276
0.5407637571320733	-6.481817810888065
0.5408530146479379	-6.490100869981349
0.540940176620949	-6.498219254564647
0.5410252449311063	-6.5061717613025465
0.5411082214552202	-6.513957184545117
0.5411891080669095	-6.521574316330518
0.5412679066365993	-6.529021946387596
0.541344619031521	-6.536298862138361
0.54141924711571	-6.5434038487005495
0.5414917927500064	-6.550335688890132
0.5415622577920516	-6.5570931632238585
0.5416306440962915	-6.563675049921747
0.5416969535139715	-6.570080124909597
0.5417611878931404	-6.5763071618214894
0.5418233490786474	-6.582354932002261
0.5418834389121421	-6.588222204510023
0.5419414592320771	-6.593907746118565
0.5419974118737051	-6.599410321319907
0.5420512986690807	-6.604728692326708
0.542103121447062	-6.609861619074721
0.5421528820333078	-6.61480785922527
0.5422005822502818	-6.619566168167651
0.5422462239172517	-6.624135299021591
0.5422898088502904	-6.628514002639679
0.5423313388622766	-6.632701027609711
0.5423708157628965	-6.636695120257262
0.5424082413586457	-6.640495024647886
0.5424436174528288	-6.644099482589665
0.5424769458455622	-6.647507233635572
0.5425082283337754	-6.650717015085766
0.5425374667112126	-6.653727561990111
0.5425646627684347	-6.656537607150426
0.5425898182928206	-6.659145881122911
0.5426129350685697	-6.661551112220494
0.5426340148767035	-6.663752026515155
0.5426530594950681	-6.665747347840304
0.5426700706983377	-6.667535797793102
0.542685050258013	-6.669116095736808
0.5426979999424287	-6.670486958803071
0.542708921516752	-6.671647101894273
0.5427178167429877	-6.672595237685817
0.542724687379979	-6.673330076628486
0.5427295351834116	-6.673850326950694
0.5427323619058166	-6.6741546946607295
0.5427331692965718	-6.674241883549199
0.5427319591019064	-6.674110595191108
0.5427287330649032	-6.673759528948321
0.5427234929255019	-6.673187381971678
0.5427162404205029	-6.672392849203329
0.5427069772835691	-6.671374623379004
0.5426957052452305	-6.670131395030205
0.5426824260328869	-6.668661852486508
0.5426671413708125	-6.6669646818777375
0.542649852980158	-6.665038567136222
0.5426305625789546	-6.6628821899990704
0.542609271882119	-6.660494230010315
0.5425859826014536	-6.657873364523128
0.5425606964456555	-6.655018268702075
0.5425334151203156	-6.651927615525281
0.5425041403279245	-6.648600075786662
0.5424728737678771	-6.645034318098052
0.5424396171364751	-6.641229008891427
0.5424043721269319	-6.637182812421096
0.5423671404293765	-6.632894390765793
0.5423279237308571	-6.628362403830945
0.5422867237153479	-6.6235855093507565
0.5422435420637484	-6.61856236289043
0.5421983804538925	-6.6132916178482155
0.5421512405605499	-6.607771925457639
0.5421021240554329	-6.602001934789637
0.5420510326071981	-6.595980292754579
0.5419979678814527	-6.589705644104555
0.5419429315407585	-6.583176631435354
0.5418859252446361	-6.5763918951886815
0.5418269506495705	-6.569350073654213
0.5417660094090148	-6.562049802971664
0.5417031031733947	-6.5544897171329515
0.5416382335901142	-6.54666844798431
0.5415714023035599	-6.538584625228238
0.5415026109551055	-6.530236876425773
0.5414318611831163	-6.5216238269983915
0.5413591546229547	-6.5127441002301545
0.541284492906986	-6.503596317269842
0.5412078776645807	-6.494179097132836
0.5411293105221222	-6.484491056703386
0.5410487931030092	-6.474530810736434
0.5409663270276633	-6.464296971859908
0.5408819139135327	-6.453788150576519
0.5407955553750959	-6.443002955265925
0.5407072530238703	-6.431939992186816
0.5406170084684133	-6.420597865478706
0.5405248233143308	-6.408975177164242
0.5404306991642803	-6.397070527150986
0.5403346376179765	-6.3848825132335545
0.5402366402721976	-6.372409731095552
0.5401367087207886	-6.359650774311628
0.5400348445546688	-6.346604234349397
0.5399310493618346	-6.333268700571463
0.539825324727367	-6.319642760237402
0.5397176722334367	-6.305724998505767
0.5396080934593072	-6.291513998436016
0.5394965899813426	-6.277008340990432
0.5393831633730122	-6.262206605036276
0.5392678152048961	-6.2471073673475
0.5391505470446892	-6.231709202606832
0.5390313604572099	-6.216010683407712
0.5389102570044007	-6.200010380256301
0.5387872382453393	-6.183706861573221
0.5386623057362385	-6.1670986936956895
0.5385354610304566	-6.150184440879343
0.5384067056784997	-6.132962665300166
0.5382760412280279	-6.115431927056514
0.5381434692238625	-6.097590784170858
0.5380089912079888	-6.079437792591786
0.5378726087195639	-6.0609715061959575
0.5377343232949215	-6.04219047678987
0.5375941364675769	-6.023093254111897
0.5374520497682346	-6.0036783858341085
0.5373080647247905	-5.983944417564053
0.5371621828623412	-5.963889892846895
0.5370144057031871	-5.943513353167009
0.5368647347668388	-5.9228133379501156
0.5367131715700244	-5.9017883845649095
0.5365597176266906	-5.880437028325088
0.5364043744480148	-5.858757802491154
0.5362471435424048	-5.836749238272177
0.536088026415508	-5.814409864827861
0.535927024570217	-5.791738209270194
0.5357641395066726	-5.768732796665344
0.5355993727222729	-5.745392150035597
0.5354327257116765	-5.7217147903609495
0.5352641999668095	-5.697699236581259
0.5350937969768714	-5.673344005597699
0.5349215182283388	-5.648647612274951
0.5347473652049745	-5.623608569442769
0.53457133938783	-5.598225387897836
0.5343934422552536	-5.572496576405607
0.5342136752828943	-5.546420641702112
0.5340320399437083	-5.519996088495745
0.5338485377079663	-5.493221419469032
0.5336631700432553	-5.466095135280464
0.5334759384144895	-5.438615734566185
0.533286844283912	-5.410781713941949
0.5330958891111014	-5.382591568004689
0.5329030743529793	-5.354043789334486
0.5327084014638139	-5.325136868496129
0.5325118718952282	-5.295869294041111
0.5323134870962019	-5.266239552509128
0.5321132485130822	-5.236246128430122
0.5319111575895846	-5.205887504325794
0.5317072157668017	-5.1751621607114435
0.5315014244832095	-5.144068576097713
0.53129378517467	-5.112605226992346
0.5310842992744397	-5.080770587901934
0.5308729682131746	-5.048563131333469
0.5306597934189348	-5.015981327796354
0.5304447763171933	-4.9830236458039625
0.5302279183308373	-4.94968855187534
0.5300092208801787	-4.91597451053698
0.5297886853829555	-4.881879984324503
0.5295663132543407	-4.847403433784395
0.5293421059069471	-4.81254331747566
0.5291160647508315	-4.777298091971636
0.5288881911935037	-4.741666211861429
0.5286584866399286	-4.705646129751982
0.5284269524925349	-4.669236296269462
0.5281935901512185	-4.632435160061033
0.5279584010133496	-4.595241167796558
0.5277213864737791	-4.557652764170271
0.5274825479248412	-4.5196683919024645
0.5272418867563635	-4.481286491741104
0.5269994043556692	-4.442505502463556
0.5267551021075834	-4.4033238608781815
0.5265089813944409	-4.363740001826013
0.5262610435960894	-4.323752358182539
0.5260112900898966	-4.283359360859105
0.525759722250755	-4.242559438804745
0.525506341451088	-4.201351019007809
0.5252511490608563	-4.159732526497539
0.5249941464475619	-4.1177023843456935
0.5247353349762557	-4.075259013668309
0.5244747160095409	-4.0324008336271335
0.5242122909075811	-3.989126261431461
0.5239480610281039	-3.9454337123395558
0.523682027726407	-3.901321599660392
0.5234141923553655	-3.8567883347552696
0.5231445562654348	-3.811832327039344
0.5228731208046583	-3.7664519839832735
0.5225998873186722	-3.7206457111148845
0.5223248571507101	-3.6744119120206373
0.5220480316416123	-3.6277489883473795
0.5217694121298251	-3.580655339803765
0.5214889999514131	-3.533129364162078
0.5212067964400595	-3.4851694572594574
0.5209228029270753	-3.4367740129999587
0.5206370207414025	-3.3879414233556226
0.5203494512096202	-3.338670078368467
0.5200600956559517	-3.2889583661518094
0.5197689554022672	-3.2388046728919777
0.5194760317680917	-3.1882073828497433
0.5191813260706098	-3.1371648783620607
0.5188848396246695	-3.0856755398433036
0.518586573742792	-3.0337377457872594
0.5182865297351718	-2.9813498727683783
0.5179847089096863	-2.928510295443383
0.5176811125718989	-2.875217386552806
0.5173757420250649	-2.8214695169225834
0.5170685985701392	-2.767265055465534
0.5167596835057773	-2.712602369182953
0.516448998128346	-2.6574798231661774
0.5161365437319234	-2.6018957805978955
0.5158223216083091	-2.5458486027539413
0.5155063330470264	-2.489336649004656
0.5151885793353285	-2.432358276816487
0.5148690617582053	-2.3749118417533777
0.5145477815983863	-2.3169956974784514
0.5142247401363491	-2.258608195755515
0.5138999386503208	-2.199747686450257
0.5135733784162861	-2.140412517532152
0.5132450607079934	-2.08060103507583
0.5129149867969559	-2.020311583262325
0.5125831579524636	-1.9595425043810126
0.5122495754415801	-1.89829213883066
0.5119142405291571	-1.8365588251212226
0.5115771544778314	-1.7743408998752068
0.5112383185480348	-1.7116366978291229
0.5108977339980004	-1.6484445518350774
0.5105554020837633	-1.584762792862055
0.5102113240591696	-1.520589749997596
0.5098655011758801	-1.4559237504491918
0.5095179346833756	-1.3907631195455645
0.5091686258289628	-1.325106180738517
0.508817575857778	-1.2589512556040994
0.5084647860127951	-1.192296663844032
0.5081102575348277	-1.1251407232873267
0.5077539916625351	-1.0574817498917384
0.5073959896324287	-0.9893180577450749
0.5070362526788761	-0.9206479590667593
0.5066747820341063	-0.8514697642090852
0.5063115789282153	-0.7817817816590631
0.5059466445891706	-0.7115823180393619
0.5055799802428165	-0.6408696781099295
0.505211587112879	-0.5696421647697278
0.5048414664209716	-0.4978980790575309
0.5044696193866	-0.4256357201540013
0.5040960472271666	-0.3528533853826852
0.5037207511579763	-0.27954937021152215
0.5033437323922404	-0.20572196825443578
0.5029649921410839	-0.1313694712724751
0.5025845316135471	-0.056490169175348104
0.5022023520165946	0.01891764997698364
0.5018184545551168	0.09485569997333787
0.5014328404319365	0.1713256964495189
0.5010455108478149	0.24832935688703794
0.5006564670014526	0.32586840061186106
0.5002657100894999	0.4039445487926445
0.4998732413065582	0.48255952443993966
0.4994790618451853	0.5617150524041996
0.49908317289590165	0.6414128593747557
0.49868557564719296	0.7216546738783967
0.4982862712855182	0.8024422262778295
0.49788526099531194	0.8837772487704294
0.4974825459589899	0.9656614753869595
0.49707812735695417	1.0480966419898916
0.49667200636759884	1.1310844862724956
0.4962641841673122	1.2146267477569928
0.49585466193048305	1.2987251677934992
0.4954434408295078	1.383381489558607
0.4950305220347912	1.4685974580539596
0.49461590671475336	1.5543748201050573
0.49419959603583496	1.640715324359637
0.4937815911625005	1.727620721286645
0.4933618932572436	1.8150927631745635
0.49294050348059215	1.9031332041303815
0.4925174229911134	1.9917438000779755
0.4920926529454176	2.0809263087570864
0.4916661944981627	2.1706824897215253
0.4912380488020604	2.2610141043384915
0.4908082170078792	2.3519229157865253
0.49037670026445	2.4434106890547382
0.48994349971867035	2.535479190941163
0.489508616515511	2.6281301900515333
0.4890720517980162	2.721365456798114
0.48863380670731293	2.815186763398082
0.4881938823826119	2.909595883872471
0.48775227996121584	3.00459459404481
0.4873090005785202	3.100184671539613
0.4868640453680199	3.1963678957814676
0.48641741546131523	3.293146047993161
0.4859691119881122	3.390520911195023
0.485519136076231	3.488494270203135
0.4850674888516101	3.5870679116282784
0.4846141714383072	3.686243623874595
0.484159184958508	3.7860231971381957
0.48370253053252926	3.8864084234060785
0.4832442092788225	3.9874010964545077
0.4827842223139795	4.089003011848188
0.4823225707527347	4.191215966938587
0.48185925570797405	4.294041760862797
0.4813942782907343	4.397482194542256
0.48092763961020973	4.5015390706815825
0.4804593407737591	4.606214193767089
0.47998938288690474	4.711509370065713
0.4795177670533405	4.817426407623612
0.4790444943749363	4.92396711626495
0.4785695659517414	5.031133307590638
0.47809298288198787	5.1389267949770865
0.47761474626209666	5.24734939357484
0.47713485718668214	5.356402920307638
0.4766533167485539	5.466089193870708
0.47617012603872316	5.576410034729744
0.47568528614640826	5.687367265119988
0.47519879815903543	5.798962709044195
0.4747106631622464	5.911198192272197
0.4742208822398986	6.024075542339114
0.4737294564740764	6.137596588544412
0.47323638694508713	6.251763161950603
0.4727416747314704	6.366577095381957
0.4722453209100024	6.482040223423224
0.4717473265556974	6.59815438241847
0.47124769274181333	6.714921410470081
0.4707464205398561	6.832343147436942
0.4702435110195857	6.950421434933921
0.4697389652490159	7.069158116330087
0.4692327842944206	7.188555036747875
0.4687249692203407	7.30861404306153
0.4682155210895843	7.429336983896331
0.467704440963231	7.550725709626919
0.46719172990064045	7.672782072376329
0.46667738895945154	7.79550792601485
0.4661614191955875	7.918905126158491
0.4656438216632617	8.042975530168299
0.46512459741498086	8.167720997148677
0.4646037475015492	8.293143387946396
0.46408127297207064	8.41924456514945
0.4635571748739574	8.546026393085778
0.4630314542529286	8.67349073782199
0.46250411215301773	8.801639467162303
0.46197514961657515	8.930474450647447
0.461444567684274	9.0599975595532
0.4609123673951119	9.190210666889426
0.4603785497864156	9.32111564739892
0.45984311589384574	9.452714377555937
0.45930606675139946	9.585008735565468
0.45876740339141586	9.718000601361533
0.4582271268445796	9.8516918566066
0.45768523813992307	9.98608438468992
0.45714173830483323	10.121180070726473
0.456596628365052	10.256980801556018
0.4560499093446845	10.39348846574189
0.4555015822661981	10.530704953569522
0.454951648150429	10.668632157045543
0.4544001080165873	10.80727196989663
0.45384696288225856	10.946626287568403
0.4532922137634087	11.086697007223895
0.4527358616743847	11.22748602774288
0.4521779076279257	11.368995249720568
0.45161835263515915	11.511226575466171
0.4510571977056086	11.654181909002231
0.45049444384719717	11.797863156063165
0.4499300920662492	11.942272224094076
0.44936414336749747	12.087411022250059
0.4487965987540835	12.23328146139434
0.44822745922756446	12.379885454097888
0.4476567257879143	12.527224914637667
0.4470843994335277	12.675301758996007
0.44651048116122544	12.824117904859119
0.4459349719662578	12.973675271616159
0.44535787284230627	13.123975780357897
0.4447791847814901	13.275021353875946
0.4441989087743661	13.42681391666145
0.44361704580993794	13.579355394903578
0.4430335968756527	13.732647716489218
0.44244856295741236	13.88669281100115
0.44186194503957005	14.041492609717308
0.44127374410493814	14.1970490456095
0.4406839611347917	14.353364053342473
0.4400925971088697	14.510439569272602
0.4394996530053801	14.66827753144695
0.43890512980100443	14.826879879601963
0.4383090284708994	14.986248555162646
0.4377113499887012	15.146385501241221
0.43711209532652917	15.307292662636225
0.43651126545499047	15.468971985831223
0.4359088613431805	15.631425418993814
0.4353048839586893	15.794654911974531
0.43469933426760493	15.958662416305774
0.4340922132345151	16.123449885200856
0.43348352182251176	16.289019273552398
0.43287326099319545	16.455372537931723
0.43226143170667586	16.622511636588037
0.43164803492158027	16.790438529446504
0.4310330715950508	16.959155178107803
0.4304165426827535	17.128663545846862
0.4297984491388788	17.29896559761184
0.42917879191614333	17.47006330002298
0.4285575719657986	17.641958621371437
0.42793479023763026	17.81465353161874
0.42731044767996135	17.988150002394942
0.42668454523965726	18.162450006998075
0.42605708386213037	18.337555520392822
0.4254280644913391	18.51346851920986
0.42479748806979434	18.690190981744344
0.4241653555385656	18.867724887954992
0.4235316678372767	19.04607221946311
0.4228964259041161	19.22523495955147
0.42225963067583594	19.40521509316339
0.421621283087759	19.586014606901426
0.4209813840737788	19.76763548902646
0.420339934566363	19.9500797294568
0.41969693549656006	20.133349319766857
0.4190523877939984	20.31744625318632
0.41840629238689225	20.50237252459897
0.41775865020204384	20.68813013054166
0.4171094621648476	20.874721069203463
0.4164587291992921	21.06214734042429
0.41580645222796303	21.250410945694075
0.41515263217204956	21.439513888151918
0.414497269951343	21.62945817258474
0.4138403664842426	21.820245805426353
0.4131819226877602	22.011878794756107
0.41252193947751964	22.204359150298828
0.41186041776776294	22.39768888342277
0.41119735847135147	22.591870007138823
0.41053276249977166	22.786904536100284
0.40986663076313434	22.98279448660035
0.4091989641701813	23.1795418765727
0.40852976362828824	23.377148725589254
0.4078590300434644	23.575617054859862
0.4071867643203605	23.77494888723108
0.4065129673622669	23.97514624718477
0.4058376400711221	24.176211160837976
0.4051607833475114	24.3781456559411
0.40448239809067027	24.580951761877298
0.40380248519849127	24.784631509661253
0.4031210455675225	24.989186931938352
0.40243808009297366	25.194620062983645
0.401753589668718	25.400932938700944
0.4010675751872953	25.60812759662133
0.40038003753991463	25.816206075902898
0.39969097761645755	26.02517041732924
0.3990003963054832	26.23502266330845
0.39830829449422733	26.44576485787261
0.39761467306860715	26.657399046676293
0.3969195329132275	26.869927276995785
0.39622287491137714	27.083351597727887
0.3955246999450386	27.29767405938939
0.3948250088948851	27.51289671411562
0.394123802640289	27.72902161565968
0.3934210820593205	27.946050819391488
0.3927168480287518	28.163986382296756
0.3920111014240616	28.382830362975962
0.391303843119437	28.602584821643283
0.39059507398777465	28.823251820126064
0.38988479490068606	29.044833421863064
0.3891730067285004	29.267331691904403
0.38845971034026644	29.490748696909847
0.3877449066037534	29.715086505148363
0.3870285963854585	29.940347186496695
0.3863107805506069	30.166532812438785
0.3855914599631542	30.39364545606442
0.3848706354857909	30.621687192068837
0.3841483079799433	30.850660096751284
0.3834244783057782	31.080566248013955
0.3826991473222053	31.311407725361587
0.38197231588687863	31.54318660990015
0.38124398485620176	31.775904984335778
0.38051415508532727	32.00956493297412
0.37978282742816344	32.24416854171935
0.37905000273737405	32.479717898072636
0.3783156818643817	32.71621509113221
0.3775798656593722	32.95366221159162
0.37684255497129504	33.19206135173902
0.3761037506478685	33.43141460545633
0.3753634535355798	33.67172406821817
0.37462166447969014	33.912991837090935
0.37387838432423615	34.15522001073198
0.37313361391203204	34.398410689388406
0.37238735408467494	34.64256597489666
0.37163960568254467	34.88768797068068
0.37089036954480764	35.13377878175197
0.37013964650941994	35.380840514707984
0.36938743741312896	35.62887527773165
0.36863374309147784	35.877885180589985
0.36787856437880473	36.12787233463353
0.3671219021082506	36.378838852795305
0.36636375711175706	36.63078684958971
0.36560413022007093	36.883718441112116
0.3648430222627474	37.13763574503713
0.36408043406815266	37.392540880618455
0.3633163664634651	37.64843596868771
0.36255082027467844	37.9053231316531
0.3617837963266063	38.16320449349919
0.3610152954428812	38.422082179785555
0.3602453184459603	38.68195831764589
0.3594738661571273	38.94283503578731
0.35870093939649406	39.20471446448911
0.3579265389830027	39.467598735602245
0.3571506657344297	39.73148998254827
0.35637332046738884	39.996390340317895
0.35559450399733195	40.262301945471236
0.3548142171385513	40.52922693613596
0.3540324607041856	40.797167452006526
0.35324923550621745	41.06612563434371
0.35246454235548025	41.33610362597314
0.35167838206165764	41.607103571284924
0.350890755433288	41.879127616232445
0.350101663277766	42.15217790833159
0.3493111064013451	42.42625659665938
0.34851908560914124	42.70136583185429
0.3477256017051332	42.97750776611377
0.3469306554921657	43.25468455319454
0.3461342477719545	43.53289834841145
0.3453363793450844	43.81215130863602
0.3445370510110153	44.0924455922963
0.3437362635680831	44.37378335937569
0.3429340178135026	44.65616677141187
0.3421303145433689	44.939597991496186
0.3413251545526608	45.22407918427269
0.3405185386352446	45.50961251593724
0.33971046758387224	45.79620015423646
0.33890094219018907	46.08384426846722
0.3380899632447318	46.37254702947535
0.3372775315369342	46.662310609655464
0.33646364785512534	46.9531371829489
0.33564831298653725	47.24502892484426
0.3348315277173048	47.53798801237537
0.33401329283246495	47.83201662412106
0.33319360911596474	48.12711694020396
0.33237247735065995	48.423291142290005
0.3315498983183182	48.720541413587156
0.33072587279962284	49.018869938844865
0.32990040157417255	49.318278904353015
0.3290734854204853	49.61877049794121
0.3282451251160013	49.92034690897765
0.32741532143708274	50.22301032836861
0.3265840751590203	50.526762948557604
0.32575138705603096	50.83160696352382
0.3249172579012628	51.137544568782225
0.3240816884667975	51.44457796138215
0.32324467952365116	51.75270933990651
0.322406231841777	52.06194090447121
0.3215663461900687	52.372274856723905
0.32072502333636255	52.68371339984362
0.3198822640474368	52.99625873853912
0.3190380690890182	53.309913079049004
0.31819243922578105	53.624678629140305
0.31734537522135214	53.940557598107844
0.31649687783831026	54.25755219677303
0.31564694783818803	54.57566463748369
0.31479558598147966	54.894897134112576
0.3139427930276352	55.21525190205705
0.31308856973506904	55.53673115823764
0.31223291686115945	55.859337121097894
0.3113758351622512	56.18307201060297
0.3105173253936568	56.50793804823914
0.30965738830966005	56.833937457012844
0.30879602466351797	57.161072461449805
0.3079332352074631	57.489345287594276
0.30706902069270375	57.818758163008575
0.3062033818694298	58.149313316771284
0.3053363194868115	58.48101297947731
0.30446783429300184	58.81385938323689
0.30359792703514166	59.14785476167443
0.3027265984593601	59.48300134992801
0.3018538493107745	59.81930138464854
0.30097968033349426	60.15675710399865
0.3001040922706266	60.49537074765221
0.29922708586427205	60.83514455679333
0.2983486618555298	61.17608077411566
0.29746882098450217	61.51818164382146
0.2965875639902925	61.86144941162083
0.29570489161100894	62.20588632473081
0.29482080458376736	62.551494631874775
0.2939353036446917	62.89827658328154
0.29304838952891893	63.24623443068438
0.29216006297059727	63.59537042732054
0.29127032470289144	63.94568682792996
0.2903791754579826	64.29718588875512
0.2894866159670714	64.64986986753945
0.288592646960381	65.00374102352727
0.28769726916715743	65.35880161746266
0.2868004833156707	65.7150539115884
0.2859022901332202	66.07250016964564
0.28500269034613485	66.43114265687285
0.28410168467977376	66.79098364000514
0.2831992738585305	67.15202538727304
0.2822954586058341	67.51427016840275
0.281390239644152	67.87772025461358
0.28048361769498886	68.2423779186193
0.27957559347889255	68.6082454346259
0.2786661677154558	68.97532507833068
0.27775534112331396	69.34361912692252
0.2768431144201509	69.71312985908035
0.27592948832270114	70.08385955497263
0.2750144635467497	70.45581049625626
0.2740980408071338	70.82898496607595
0.27318022081774873	71.20338524906374
0.272261004291545	71.57901363133783
0.27134039194053255	71.95587240050196
0.2704183844757819	72.33396384564456
0.26949498260742943	72.71329025733799
0.2685701870446727	73.09385392763782
0.2676439984957789	73.4756571500821
0.2667164176680832	73.85870221969013
0.2657874452679915	74.24299143296243
0.26485708200098235	74.62852708787932
0.26392532857160783	75.01531148390065
0.2629921856834997	75.40334692196464
0.26205765403936376	75.7926357044871
0.2611217343409887	76.18318013536107
0.2601844272892458	76.57498251995584
0.2592457335840874	76.96804516511594
0.2583056539245545	77.3623703791604
0.2573641890087754	77.75796047188238
0.25642133953396723	78.1548177545484
0.2554771061964376	78.55294453989681
0.2545314896915893	78.95234314213809
0.2535844907139194	79.35301587695321
0.25263610995702174	79.7549650614933
0.251686348113589	80.15819301437882
0.2507352058754151	80.56270205569888
0.24978268393339656	80.96849450701049
0.24882878297753255	81.37557269133728
0.24787350369692948	81.7839389331696
0.24691684677980175	82.19359555846322
0.2459588129134734	82.60454489463845
0.24499940278437932	83.01678927058
0.24403861707806807	83.43033101663579
0.2430764564792042	83.84517246461617
0.24211292167156775	84.26131594779295
0.24114801333805852	84.67876380089966
0.24018173216069555	85.09751836012968
0.23921407882062165	85.51758196313611
0.23824505399810142	85.9389569490304
0.23727465837252776	86.3616456583823
0.23630289262241944	86.78565043321932
0.2353297574254239	87.2109736170254
0.23435525345832248	87.6376175547394
0.2333793813970258	88.06558459275607
0.23240214191658135	88.49487707892457
0.23142353569117044	88.92549736254728
0.23044356339411634	89.3574477943797
0.22946222569787722	89.79073072662916
0.2284795232740561	90.22534851295474
0.22749545679339775	90.661303508466
0.22651002692579283	91.09859806972233
0.22552323434027588	91.53723455473249
0.22453507970503409	91.97721532295348
0.22354556368739958	92.41854273529052
0.22255468695385924	92.86121915409498
0.22156245017005308	93.30524694316541
0.22056885400077608	93.75062846774519
0.21957389910997832	94.19736609452318
0.21857758616076914	94.6454621916316
0.21757991581541986	95.09491912864632
0.21658088873536166	95.54573927658663
0.21558050558118763	95.99792500791222
0.2145787670126585	96.45147869652538
0.213575673688701	96.90640271776786
0.21257122626740996	97.36269944842205
0.21156542540604856	97.82037126670862
0.21055827176105632	98.27942055228708
0.2095497659880406	98.739849686254
0.20853990874178702	99.20166105114365
0.20752870067625515	99.66485703092548
0.20651614244458746	100.12944001100522
0.20550223469909987	100.595412378223
0.2044869780912945	101.06277652085312
0.2034703732718543	101.53153482860296
0.20245242089064747	102.00168969261267
0.20143312159672852	102.47324350545416
0.20041247603833978	102.94619866113086
0.1993904848629133	103.42055755507654
0.19836714871706973	103.89632258415438
0.19734246824662632	104.37349614665739
0.19631644409659144	104.85208064230613
0.19528907691117087	105.33207847224915
0.1942603673337658	105.81349203906228
0.19323031600697957	106.296323746747
0.1921989235726121	106.78057600073102
0.1911661906716689	107.26625120786633
0.19013211794435592	107.7533517764297
0.18909670603008732	108.24188011612057
0.18805995556748198	108.73183863806169
0.18702186719436675	109.22322975479767
0.18598244154778035	109.71605588029473
0.18494167926396976	110.2103194299395
0.18389958097839768	110.70602282053858
0.18285614732574032	111.2031684703182
0.18181137893988994	111.70175879892277
0.18076527645395443	112.20179622741493
0.1797178405002634	112.70328317827415
0.178669071710366	113.20622207539701
0.17761897071503124	113.7106153440954
0.17656753814425513	114.21646541109655
0.17551477462725606	114.72377470454249
0.17446068079248117	115.23254565398803
0.17340525726760295	115.74278069040217
0.17234850467952487	116.25448224616602
0.17129042365438227	116.76765275507208
0.17023101481754135	117.2822946523242
0.16917027879360244	117.79841037453642
0.1681082162064028	118.31600235973262
0.16704482767901463	118.83507304734533
0.16598011383374925	119.35562487821622
0.16491407529215865	119.87766029459362
0.16384671267503562	120.40118174013335
0.1627780266024144	120.92619165989768
0.16170801769357537	121.45269250035415
0.16063668656704436	121.98068670937506
0.1595640338405927	122.51017673623781
0.15849006013124034	123.04116503162244
0.15741476605526064	123.57365404761265
0.15633815222817463	124.10764623769377
0.15526021926475675	124.6431440567535
0.15418096777903786	125.1801499610798
0.15310039838430237	125.71866640836066
0.1520185116930931	126.25869585768467
0.1509353083172096	126.80024076953858
0.1498507888677143	127.34330360580738
0.14876495395492834	127.88788682977365
0.14767780418843723	128.43399290611742
0.14658934017709052	128.9816243009145
0.14549956252900237	129.53078348163632
0.14440847185155511	130.08147291714926
0.14331606875139877	130.63369507771424
0.14222235383445275	131.18745243498515
0.14112732770590825	131.74274746201002
0.14003099097022884	132.2995826332273
0.1389333442311531	132.85796042446898
0.13783438809169327	133.4178833129573
0.13673412315413827	133.97935377730437
0.13563255002005659	134.54237429751237
0.1345296692902951	135.10694735497285
0.1334254815649803	135.67307543246483
0.13231998744352233	136.24076101415608
0.13121318752461628	136.81000658560055
0.13010508240623833	137.38081463373928
0.12899567268565312	137.95318764689839
0.1278849589594135	138.5271281147897
0.12677294182335896	139.1026385285091
0.1256596218726204	139.67972138053642
0.12454499970162113	140.2583791647348
0.12342907590407631	140.8386143763498
0.12231185107299536	141.4204295120086
0.12119332580068219	142.0038270697201
0.12007350067873991	142.58880954887354
0.11895237629806746	143.1753794502376
0.1178299532488661	143.76353927596136
0.11670623212063344	144.35329152957152
0.11558121350217344	144.94463871597333
0.11445489798159264	145.53758334144933
0.11332728614629953	146.13212791365905
0.11219837858301142	146.7282749416372
0.11106817587775207	147.3260269357953
0.10993667861585414	147.92538640791864
0.10880388738195895	148.52635587116686
0.10766980276002033	149.12893784007372
0.10653442533330437	149.7331348305454
0.10539775568438975	150.33894935986066
0.104259794395171	150.94638394666973
0.10312054204685926	151.55544111099368
0.10197999921998385	152.1661233742245
0.10083816649438938	152.7784332591233
0.09969504444924493	153.39237328982102
0.09855063366303939	154.00794599181643
0.09740493471358216	154.62515389197705
0.09625794817800787	155.24399951853653
0.09510967463277925	155.86448540109615
0.09396011465367989	156.4866140706225
0.09280926881582513	157.11038805944798
0.09165713769365698	157.73580990126933
0.09050372186094974	158.36288213114796
0.0893490218908049	158.99160728550825
0.08819303835566072	159.62198790213765
0.08703577182728812	160.25402652018627
0.08587722287679174	160.88772568016503
0.08471739207461378	161.52308792394697
0.08355627999053075	162.16011579476444
0.08239388719366483	162.79881183721
0.08123021425247032	163.4391785972358
0.08006526173474596	164.081218622152
0.07889903020763289	164.7249344606266
0.07773152023761729	165.3703286626856
0.07656273239052555	166.01740377971097
0.0753926672315341	166.66616236444162
0.07422132532516545	167.3166069709706
0.07304870723528915	167.96874015474705
0.07187481352512406	168.62256447257425
0.07069964475724276	169.27808248260826
0.06952320149356685	169.93529674435914
0.06834548429537043	170.594209818689
0.06716649372328606	171.2548242678115
0.06598623033729399	171.9171426552921
0.0648046946967397	172.58116754604657
0.06362188736032048	173.24690150633995
0.06243780888609588	173.9143471037878
0.061252459831482205	174.5835069073539
0.06006584075326038	175.25438348735088
0.05887795220757219	175.92697941543756
0.05768879474992108	176.6012972646213
0.05649836893517987	177.2773396092548
0.05530667531758183	177.95510902503685
0.054113714450731105	178.6346080890112
0.05291948688759902	179.31583937956674
0.05172399318052482	179.99880547643602
0.050527233881219935	180.68350896069452
0.049329209540766056	181.36995241476131
0.04812992070961765	182.058138422397
0.04692936793760532	182.748069568704
0.04572755177393215	183.43974844012584
0.04452447276717529	184.13317762444652
0.04332013146529468	184.82835971078913
0.04211452841562582	185.52529728961704
0.040907664164881355	186.22399295273124
0.039699539259157174	186.92444929327164
0.03849015424393224	187.6266689057148
0.037279509664062224	188.33065438587454
0.036067606063794465	189.03640833090085
0.034854443986755364	189.7439333392794
0.03364002397596179	190.4532320108307
0.03242434657381295	191.16430694671033
0.031207412322100885	191.87716074940715
0.029989221762005	192.5917960227434
0.028769775434093692	193.30821537187487
0.02754907387833042	194.02642140328788
0.026327117634070005	194.74641672480223
0.02510390724005672	195.46820394556707
0.023879443234436564	196.19178567606292
0.022653726154746475	196.9171645280993
0.021426756537923947	197.64434311481597
0.02019853492030068	198.3733240506808
0.01896906183761042	199.10410995148948
0.017738337824986163	199.83670343436535
0.0165063634169609	200.57110711775917
0.015273139147472803	201.30732362144718
0.014038665549860652	202.04535556653175
0.012802943156869914	202.78520557544098
0.011565972500648145	203.52687627192645
0.01032775411275199	204.2703702810647
0.009088288524147904	205.015690229255
0.007847576265204935	205.76283874422046
0.006605617865706113	206.5118184550052
0.005362413854847446	207.26263199197655
0.004117964761229777	208.01528198682138
0.0028722711128719852	208.76977107254834
0.0016253334372046246	209.5261018834858
0.0003771522610751272	210.2842770552813
-0.0008722718892558833	211.0442992249013
-0.0021229384881093953	211.80617103063142
-0.0033748470103863613	212.56989511207314
-0.004627996931574941	213.33547411014712
-0.005882387727735517	214.1029106670893
-0.007138018875513277	214.8722074264525
-0.00839488985212767	215.64336703310414
-0.009653000135378759	216.41639213322716
-0.010912349203640244	217.19128537431868
-0.012172936535858695	217.96804940518967
-0.013434761611560788	218.74668687596414
-0.01469782391084011	219.527200438079
-0.015962122914363497	220.3095927442828
-0.017227658103371162	221.09386644863588
-0.018494428959673265	221.88002420650997
-0.019762434965643824	222.66806867458644
-0.021031675604229715	223.45800251085706
-0.02230215035894458	224.24982837462198
-0.02357385871386628	225.04354892649175
-0.02484680015363703	225.83916682838364
-0.026120974163465274	226.63668474352306
-0.027396380229121393	227.4361053364424
-0.02867301783693869	228.2374312729807
-0.029950886473807305	229.04066522028245
-0.031229985627184098	229.8458098467981
-0.03251031478508123	230.65286782228304
-0.033791873436068036	231.46184181779608
-0.03507466106927473	232.2727345057008
-0.03635867717438362	233.08554855966324
-0.037643921241635424	233.90028665465266
-0.038930392761822315	234.7169514669395
-0.040218091226294245	235.53554567409645
-0.041507016126948376	236.3560719549972
-0.04279716695623545	237.1785329898156
-0.04408854320715811	238.00293146002574
-0.04538114437326834	238.82927004839996
-0.04667496994866137	239.65755143901106
-0.04797001942798822	240.48777831722873
-0.04926629230644161	241.31995336972128
-0.05056378807976141	242.1540792844533
-0.051862506244229375	242.9901587506868
-0.053162446296678205	243.82819445897877
-0.0544636077344756	244.66818910118343
-0.0557659900555351	245.5101453704483
-0.05706959275831257	246.35406596121652
-0.05837441534180103	247.1999535692239
-0.05968045730553519	248.04781089150137
-0.06098771814958444	248.89764062637107
-0.062296197374561865	249.7494454734474
-0.06360589448161102	250.603228133638
-0.06491680897241223	251.45899130914023
-0.06622894034918361	252.31673770344304
-0.06754228811467318	253.17647002132486
-0.0688568517721643	254.03819096885383
-0.0701726308254713	254.90190325338776
-0.07148962477893964	255.76760958357244
-0.07280783313744416	256.6353126693411
-0.07412725540638752	257.50501522191547
-0.07544789109170642	258.37671995380396
-0.0767697396998593	259.25042957880055
-0.07809280073783269	260.12614681198596
-0.07941707371314036	261.00387436972625
-0.08074255813381728	261.8836149696716
-0.08206925350842678	262.76537133075624
-0.08339715934604823	263.64914617319954
-0.0847262751562931	264.5349422185026
-0.08605660044928556	265.42276218945017
-0.08738813473567147	266.3126088101086
-0.08872087752662018	267.20448480582564
-0.09005482833381673	268.09839290323123
-0.09138998666946099	268.9943358302343
-0.0927263520462758	269.8923163160252
-0.09406392397749547	270.7923370910726
-0.09540270197687038	271.694400887125
-0.09674268555866437	272.5985104372093
-0.09808387423765749	273.5046684756299
-0.09942626752913813	274.41287773796927
-0.10076986494890937	275.3231409610854
-0.10211466601328363	276.23546088311446
-0.10346067023908379	277.14984024346717
-0.1048078771436405	278.0662817828299
-0.10615628624479326	278.98478824316413
-0.10750589706089222	279.90536236770515
-0.1088567091107859	280.82800690096235
-0.11020872191383543	281.7527245887183
-0.11156193498990578	282.6795181780281
-0.11291634785936323	283.60839041721954
-0.11427196004307809	284.5393440558919
-0.115628771062423	285.4723818449147
-0.11698678043927395	286.40750653642976
-0.118345987696005	287.3447208838476
-0.1197063923554893	288.28402764184875
-0.1210679939411018	289.22542956638415
-0.12243079197671407	290.1689294146716
-0.12379478598669254	291.1145299451974
-0.12515997549590577	292.0622339177161
-0.12652636002971024	293.01204409324924
-0.1278939391139647	293.96396323408385
-0.12926271227501437	294.9179941037735
-0.1306326790397068	295.8741394671386
-0.13200383893537254	296.8324020902625
-0.1333761914898377	297.79278474049454
-0.13474973623142134	298.75529018644727
-0.13612447268892922	299.71992119799796
-0.13750040039165587	300.6866805462847
-0.13887751886938454	301.65557100371024
-0.14025582765238728	302.6265953439374
-0.14163532627142242	303.59975634189266
-0.143016014257732	304.5750567737612
-0.1443978911430462	305.5524994169902
-0.14578095645957553	306.5320870502866
-0.14716520974001793	307.5138224536157
-0.148550650517551	308.4977084082031
-0.14993727832583634	309.4837476965321
-0.15132509269901354	310.4719431023444
-0.1527140931717056	311.4622974106385
-0.15410427927901532	312.45481340767054
-0.15549565055651848	313.4494938809523
-0.15688820654027616	314.44634161925234
-0.15828194676682078	315.4453594125939
-0.15967687077316492	316.4465500522561
-0.16107297809679436	317.449916330772
-0.16247026827566907	318.45546104192766
-0.1638687408482268	319.46318698076465
-0.16526839535337431	320.47309694357534
-0.16666923133049186	321.48519372790594
-0.16807124831943326	322.49948013255414
-0.16947444586052077	323.5159589575694
-0.17087882349454672	324.5346330042517
-0.17228438076277644	325.55550507515176
-0.1736911172069385	326.57857797407013
-0.1750990323692337	327.6038545060574
-0.17650812579232614	328.63133747741165
-0.17791839701934975	329.66102969568146
-0.1793298455939019	330.6929339696626
-0.18074247106004362	331.7270531093972
-0.182156272962305	332.76338992617633
-0.18357125084567186	333.8019472325372
-0.18498740425559926	334.8427278422607
-0.186404732737999	335.885734570377
-0.1878232358392488	336.93097023315863
-0.18924291310618227	337.9784376481237
-0.19066376408609287	339.0281396340349
-0.19208578832673645	340.08007901089724
-0.19350898537632427	341.1342585999594
-0.19493335478352314	342.1906812237135
-0.19635889609746068	343.2493497058928
-0.19778560886771748	344.31026687147295
-0.1992134926443299	345.37343554666927
-0.20064254697778644	346.4388585589403
-0.20207277141903418	347.50653873698275
-0.20350416551946898	348.5764789107335
-0.2049367288309391	349.6486819113696
-0.2063704609057454	350.7231505713058
-0.20780536129664123	351.7998877241956
-0.20924142955682554	352.8788962049298
-0.21067866523994813	353.9601788496373
-0.21211706790011084	355.0437384956834
-0.21355663709185935	356.1295779816696
-0.2149973723701852	357.2177001474343
-0.2164392732905321	358.3081078340496
-0.21788233940878346	359.40080388382404
-0.2193265702812713	360.4957911402999
-0.22077196546476852	361.5930724482536
-0.22221852451649676	362.6926506536948
-0.22366624699411597	363.7945286038665
-0.22511513245572876	364.89870914724423
-0.2265651804598806	366.0051951335355
-0.22801639056555809	367.1139894136797
-0.22946876233218358	368.22509483984635
-0.23092229531962516	369.3385142654377
-0.23237698908818596	370.4542505450833
-0.23383284319860517	371.57230653464455
-0.23528985721206078	372.6926850912113
-0.2367480306901695	373.81538907310284
-0.2382073631949826	374.9404213398659
-0.23966785428898316	376.0677847522752
-0.2411295035350942	377.1974821723329
-0.24259231049666885	378.3295164632682
-0.2440562747374933	379.4638904895373
-0.2455213958217858	380.6006071168204
-0.2469876733142012	381.73966921202526
-0.24845510677981683	382.88107964328384
-0.24992369578414853	384.0248412799521
-0.2513934398931356	385.1709569926107
-0.2528643386731516	386.3194296530642
-0.25433639169099187	387.4702621343391
-0.25580959851388785	388.6234573106864
-0.2572839587094894	389.779018057577
-0.2587594718458773	390.9369472517052
-0.2602361374915579	392.0972477709868
-0.26171395521546054	393.25992249455766
-0.2631929245869396	394.4249743027734
-0.2646730451757733	395.5924060772106
-0.26615431655216404	396.7622207006651
-0.26763673828673307	397.9344210571516
-0.26912030995052666	399.1090100319027
-0.27060503111500833	400.28599051136956
-0.2720909013520677	401.4653653832217
-0.273577920234008	402.6471375363443
-0.2750660873335518	403.8313098608398
-0.2765554022238451	405.01788524802737
-0.2780458644784471	406.2068665904417
-0.2795374736713334	407.3982567818317
-0.28103022937690186	408.5920587171629
-0.28252413116995806	409.7882752926134
-0.28401917862572795	410.9869094055762
-0.2855153713198482	412.1879639546586
-0.28701270882837415	413.3914418396792
-0.2885111907277692	414.59734596166993
-0.290010816594912	415.80567922287497
-0.2915115860070914	417.01644452674964
-0.2930134985420094	418.2296447779614
-0.2945165537777777	419.44528288238644
-0.2960207512929161	420.66336174711506
-0.2975260906663555	421.88388428044203
-0.29903257147743545	423.1068533918765
-0.3005401933059021	424.3322719921337
-0.3020489557319103	425.56014299313784
-0.30355885833602175	426.7904693080223
-0.30506990069920337	428.02325385112516
-0.30658208240282625	429.25849953799593
-0.30809540302866784	430.4962092853873
-0.30960986215891245	431.7363860112597
-0.31112545937614206	432.97903263477804
-0.31264219426334644	434.2241520763142
-0.3141600664039158	435.4717472574452
-0.3156790753816421	436.7218211009492
-0.31719922078071855	437.97437653081244
-0.31872050218573694	439.22941647222217
-0.3202429191816938	440.48694385157
-0.32176647135397984	441.7469615964493
-0.32329115828838634	443.0094726356563
-0.3248169795711032	444.2744798991887
-0.3263439347887175	445.5419863182443
-0.32787202352821054	446.81199482522544
-0.3294012453769636	448.0845083537299
-0.3309315999227523	449.3595298385596
-0.3324630867537452	450.6370622157139
-0.333995705458508	451.9171084223917
-0.3355294556259976	453.1996713969905
-0.3370643368455666	454.4847540791066
-0.33860034870695943	455.77235940953307
-0.3401374908003076	457.0624903302609
-0.3416757627161435	458.3551497844789
-0.3432151640453814	459.6503407165695
-0.34475569437933196	460.94806607211467
-0.3462973533096904	462.2483287978899
-0.34784014042854533	463.55113184186575
-0.3493840553283687	464.8564781532084
-0.35092909760202595	466.16437068227805
-0.3524752668427645	467.474812380628
-0.3540225626442223	468.7878062010061
-0.3555709846004215	470.1033550973523
-0.35712053230576946	471.42146202479876
-0.35867120535505936	472.74212993967086
-0.36022300334346646	474.06536179948534
-0.3617759258665527	475.39116056294995
-0.3633299725202612	476.7195291899627
-0.3648851429009176	478.05047064161204
-0.3664414366052305	479.3839878801774
-0.3679988532302884	480.72008386912717
-0.3695573923735621	482.05876157311815
-0.3711170536329013	483.4000239579964
-0.3726778366065357	484.74387399079666
-0.3742397408930747	486.09031463973974
-0.3758027660915051	487.43934887423575
-0.3773669118011936	488.7909796648809
-0.37893217762187986	490.1452099834564
-0.3804985631536854	491.50204280293264
-0.3820660679971039	492.8614810974625
-0.38363469175300824	494.22352784238643
-0.38520443402264265	495.5881860142279
-0.38677529440762903	496.9554585906959
-0.38834727250996237	498.32534855068246
-0.3899203679320092	499.6978588742642
-0.39149458027651096	501.0729925426995
-0.3930699091465792	502.45075253842964
-0.3946463541456994	503.8311418450793
-0.39622391487772785	505.21416344745285
-0.39780259094689	506.59982033153824
-0.39938238195778303	507.98811548450306
-0.4009632875153713	509.3790518946954
-0.40254530722499016	510.7726325516439
-0.4041284406923424	512.1688604460556
-0.40571268752349826	513.5677385698202
-0.40729804732489644	514.9692699160007
-0.4088845197033413	516.3734574788446
-0.41047210426600395	517.7803042537719
-0.4120608006204214	519.1898132373846
-0.41365060837449297	520.6019874274584
-0.41524152713648743	522.0168298229473
-0.41683355651503345	523.4343434239826
-0.41842669611912375	524.8545312318686
-0.4200209455581164	526.2773962490883
-0.4216163044417293	527.7029414792966
-0.42321277238004207	529.1311699273261
-0.42481034898349607	530.562084599181
-0.42640903386289625	531.9956885020408
-0.4280088266294031	533.4319846442579
-0.42960972689453997	534.8709760353579
-0.43121173427018855	536.3126656860383
-0.4328148483685889	537.7570566081681
-0.4344190688023387	539.2041518147905
-0.4360243951843931	540.6539543201181
-0.43763082712806595	542.1064671395347
-0.43923836424702595	543.5616932895939
-0.4408470061552996	545.019635788021
-0.44245675246726585	546.4802976537089
-0.44406760279766044	547.9436819067213
-0.44567955676157445	549.4097915682902
-0.44729261397444964	550.8786296608152
-0.4489067740520847	552.350199207866
-0.4505220366106284	553.8245032341761
-0.4521384012665849	555.3015447656511
-0.45375586763680736	556.7813268293588
-0.45537443533849997	558.2638524535364
-0.4569941039892206	559.749124667586
-0.4586148732068719	561.2371465020734
-0.46023674260971387	562.727920988733
-0.46185971181635044	564.2214511604609
-0.46348378044573507	565.7177400513197
-0.46510894811717046	567.2167906965336
-0.46673521445030625	568.7186061324927
-0.46836257906513795	570.2231893967482
-0.4699910415820105	571.7305435280148
-0.4716206016216133	573.2406715661693
-0.47325125880498164	574.75357655225
-0.4748830127534969	576.2692615284589
-0.47651586308888316	577.7877295381542
-0.47814980943320967	579.3089836258599
-0.47978485140888827	580.8330268372572
-0.4814209886386781	582.3598622191884
-0.4830582207456746	583.8894928196546
-0.48469654735332063	585.4219216878145
-0.4863359680853981	586.9571518739892
-0.4879764825660291	588.4951864296537
-0.4896180904196805	590.0360284074441
-0.49126079127115313	591.5796808611523
-0.4929045847455942	593.1261468457278
-0.49454947046848424	594.6754294172747
-0.49619544806564764	596.227531633058
-0.49784251716324296	597.7824565514933
-0.49949067738776737	599.3402072321536
-0.5011399283660558	600.9007867357687
-0.5027902697252802	602.4641981242197
-0.5044417010929477	604.0304444605443
-0.5060942220969022	605.5995288089323
-0.5077478323653234	607.1714542347305
-0.5094025315267238	608.7462238044334
-0.5110583192099518	610.3238405856904
-0.5127151950441864	611.9043076473058
-0.5143731586589448	613.4876280592317
-0.5160322096840744	615.073804892574
-0.5176923477497541	616.6628412195873
-0.5193535724864989	618.254740113681
-0.521015883525149	619.8495046494097
-0.5226792804968788	621.4471379024818
-0.5243437630331945	623.0476429497528
-0.526009330765929	624.6510228692274
-0.5276759833272485	626.2572807400608
-0.5293437203496423	627.8664196425544
-0.5310125414659369	629.4784426581584
-0.5326824463092801	631.09335286947
-0.5343534345131488	632.7111533602348
-0.536025505711347	634.3318472153427
-0.5376986595380064	635.9554375208319
-0.5393728956275853	637.5819273638864
-0.5410482136148657	639.2113198328336
-0.5427246131349563	640.8436180171493
-0.544402093823291	642.4788250074506
-0.5460806553156254	644.1169438955025
-0.5477602972480425	645.7579777742096
-0.5494410192569469	647.4019297376249
-0.5511228209790653	649.0488028809409
-0.552805702051449	650.6986003004945
-0.554489662111471	652.3513250937646
-0.5561747007968231	654.0069803593709
-0.5578608177455225	655.6655691970783
-0.5595480125959024	657.3270947077887
-0.5612362849866206	658.991559993548
-0.5629256345566508	660.6589681575392
-0.5646160609452897	662.3293223040897
-0.5663075637921504	664.002625538664
-0.5680001427371649	665.6788809678637
-0.5696937974205845	667.3580916994355
-0.5713885274829724	669.0402608422578
-0.5730843325652183	670.7253915063523
-0.5747812123085195	672.4134868028746
-0.5764791663543969	674.1045498441213
-0.5781781943446812	675.7985837435226
-0.5798782959215203	677.4955916156487
-0.581579470727379	679.1955765762029
-0.5832817184050316	680.8985417420251
-0.584985038597572	682.604490231093
-0.5866894309484044	684.3134251625164
-0.5883948951012474	686.0253496565409
-0.5901014307001299	687.740266834546
-0.5918090373893944	689.4581798190471
-0.5935177148136956	691.1790917336909
-0.5952274626179993	692.9030057032576
-0.5969382804475816	694.6299248536609
-0.5986501679480278	696.3598523119468
-0.6003631247652373	698.0927912062934
-0.6020771505454148	699.8287446660097
-0.6037922449350765	701.5677158215368
-0.6055084075810435	703.3097078044466
-0.6072256381304497	705.054723747441
-0.6089439362307368	706.8027667843525
-0.6106633015296491	708.5538400501432
-0.6123837336752431	710.3079466809052
-0.6141052323158782	712.0650898138571
-0.6158277971002213	713.8252725873508
-0.617551427677245	715.5884981408616
-0.6192761236962278	717.3547696149958
-0.6210018848067493	719.124090151486
-0.6227287106586997	720.8964628931927
-0.6244566009022686	722.6718909841022
-0.6261855551879498	724.4503775693273
-0.6279155731665401	726.2319257951079
-0.6296466544891403	728.0165388088085
-0.6313787988071524	729.8042197589183
-0.6331120057722803	731.5949717950533
-0.6348462750365295	733.3887980679535
-0.6365816062522076	735.1857017294813
-0.6383179990719199	736.9856859326242
-0.6400554531485747	738.7887538314941
-0.6417939681353778	740.5949085813231
-0.6435335436858356	742.4041533384701
-0.645274179453754	744.2164912604119
-0.6470158750932373	746.0319255057509
-0.6487586302586862	747.8504592342073
-0.6505024446047997	749.6720956066262
-0.6522473177865757	751.4968377849722
-0.6539932494593048	753.3246889323285
-0.6557402392785798	755.1556522129023
-0.6574882869002859	756.9897307920152
-0.6592373919806049	758.8269278361138
-0.6609875541760126	760.667246512759
-0.6627387731432812	762.5106899906343
-0.6644910485394756	764.3572614395372
-0.666244380021957	766.2069640303872
-0.6679987672483783	768.0598009352192
-0.6697542098766852	769.9157753271847
-0.6715107075651191	771.7748903805522
-0.6732682599722114	773.6371492707094
-0.6750268667567852	775.502555174156
-0.6767865275779543	777.3711112685091
-0.6785472420951277	779.2428207325032
-0.680309009968002	781.1176867459836
-0.6820718308565642	782.9957124899139
-0.6838357044210924	784.87690114637
-0.6856006303221535	786.7612558985404
-0.6873666082206042	788.6487799307326
-0.6891336377775887	790.5394764283596
-0.690901718654542	792.4333485779536
-0.6926708505131852	794.3303995671554
-0.6944410330155264	796.2306325847198
-0.6962122658238632	798.1340508205116
-0.6979845486007774	800.0406574655086
-0.6997578810091388	801.950455711799
-0.7015322627121042	803.8634487525816
-0.7033076933731128	805.7796397821648
-0.7050841726558928	807.6990319959683
-0.7068617002244549	809.6216285905205
-0.7086402757430951	811.5474327634577
-0.7104198988763939	813.4764477135276
-0.7122005692892127	815.408676640585
-0.7139822866466993	817.3441227455916
-0.7157650506142837	819.2827892306199
-0.7175488608576795	821.2246792988474
-0.7193337170428798	823.1697961545592
-0.7211196188361616	825.1181430031456
-0.7229065659040828	827.0697230511074
-0.7246945579134807	829.0245395060475
-0.7264835945314738	830.9825955766752
-0.7282736754254653	832.9438944728051
-0.7300648002631321	834.9084394053581
-0.7318569687124334	836.8762335863587
-0.7336501804416088	838.8472802289342
-0.7354444351191745	840.8215825473187
-0.7372397324139224	842.7991437568459
-0.7390360719949306	844.7799670739574
-0.7408334535315474	846.7640557161935
-0.7426318766934	848.751412902198
-0.7444313411503958	850.7420418517177
-0.7462318465727139	852.7359457855999
-0.7480333926308129	854.7331279257963
-0.749835978995426	856.7335914953535
-0.751639605337561	858.7373397184265
-0.7534442713285023	860.744375820263
-0.7552499766398085	862.7547030272168
-0.7570567209433117	864.7683245667375
-0.7588645039111189	866.7852436673753
-0.7606733252156078	868.8054635587795
-0.7624831845294335	870.828987471697
-0.764294081525523	872.8558186379751
-0.7661060158770708	874.8859602905552
-0.7679189872575521	876.91941566348
-0.7697329953407067	878.9561879918876
-0.7715480398005472	880.996280512012
-0.7733641203113591	883.0396964611871
-0.7751812365476971	885.0864390778379
-0.7769993881843867	887.1365116014892
-0.7788185748965233	889.1899172727594
-0.7806387963594725	891.2466593333635
-0.7824600522488665	893.3067410261075
-0.7842823422406081	895.3701655948971
-0.7861056660108707	897.436936284729
-0.7879300232360898	899.5070563416919
-0.7897554135929765	901.5805290129715
-0.7915818367585007	903.6573575468439
-0.7934092924099091	905.7375451926805
-0.7952377802247076	907.8210952009414
-0.7970672998806685	909.9080108231815
-0.7988978510558343	911.9982953120467
-0.8007294334285119	914.0919519212736
-0.8025620466772702	916.1889839056887
-0.8043956904809463	918.289394521212
-0.8062303645186415	920.3931870248525
-0.8080660684697203	922.5003646747059
-0.8099028020138117	924.6109307299641
-0.8117405648308073	926.7248884509008
-0.8135793566008644	928.8422410988851
-0.8154191770043991	930.9629919363706
-0.8172600257220931	933.0871442268983
-0.819101902434889	935.2147012351021
-0.8209448068239934	937.3456662266984
-0.8227887385708695	939.4800424684938
-0.8246336973572448	941.6178332283795
-0.8264796828651081	943.7590417753346
-0.8283266947767076	945.9036713794233
-0.8301747327745516	948.0517253117979
-0.832023796541409	950.203206844694
-0.833873885760305	952.3581192514313
-0.835725000114527	954.5164658064191
-0.8375771392876203	956.6782497851448
-0.8394303029633892	958.843474464186
-0.8412844908258931	961.0121431211987
-0.843139702559453	963.184259034927
-0.8449959378486454	965.3598254851929
-0.8468531963783018	967.5388457529078
-0.8487114778335139	969.7213231200607
-0.850570781899626	971.9072608697222
-0.8524311082622437	974.0966622860494
-0.8542924566072215	976.2895306542749
-0.856154826620676	978.4858692607179
-0.8580182179889733	980.6856813927743
-0.8598826303987382	982.8889703389228
-0.8617480635368464	985.0957393887214
-0.863614517090428	987.3059918328061
-0.8654819907468707	989.5197309628968
-0.8673504841938106	991.7369600717873
-0.86921999711914	993.9576824533534
-0.8710905292110027	996.1819014025488
-0.8729620801577962	998.409620215405
-0.8748346496481646	1000.64084218903
-0.8767082373710104	1002.8755706216128
-0.8785828430154858	1005.1138088124166
-0.8804584662709903	1007.355560061779
-0.8823351068271801	1009.6008276711211
-0.8842127643739556	1011.8496149429333
-0.8860914386014712	1014.1019251807853
-0.887971129200129	1016.3577616893203
-0.8898518358605824	1018.61712777426
-0.8917335582737325	1020.8800267423965
-0.8936162961307312	1023.1464619016
-0.8955000491229742	1025.4164365608124
-0.8973848169421109	1027.6899540300485
-0.8992705992800335	1029.9670176204017
-0.9011573958288844	1032.247630644032
-0.9030452062810544	1034.531796414178
-0.9049340303291772	1036.8195182451461
-0.9068238676661367	1039.1107994523184
-0.9087147179850633	1041.405643352146
-0.910606580979327	1043.7040532621522
-0.9124994563425499	1046.0060325009342
-0.9143933437685989	1048.3115843881562
-0.9162882429515828	1050.620712244556
-0.918184153585855	1052.9334193919378
-0.9200810753660169	1055.2497091531802
-0.9219790079869116	1057.5695848522282
-0.9238779511436234	1059.8930498140978
-0.9257779045314842	1062.2201073648732
-0.9276788678460669	1064.5507608317048
-0.929580840783187	1066.8850135428158
-0.931483823038902	1069.2228688274934
-0.9333878143095132	1071.5643300160966
-0.9352928142915635	1073.9094004400454
-0.937198822681834	1076.2580834318328
-0.9391058391773514	1078.6103823250141
-0.9410138634753796	1080.9663004542153
-0.9429228952734271	1083.3258411551246
-0.9448329342692382	1085.6890077644964
-0.9467439801608	1088.0558036201514
-0.9486560326463399	1090.4262320609757
-0.9505690914243204	1092.800296426919
-0.9524831561934479	1095.1780000589956
-0.9543982266526644	1097.5593462992845
-0.9563143025011508	1099.944338490927
-0.9582313834383271	1102.3329799781297
-0.9601494691638516	1104.7252741061607
-0.9620685593776178	1107.121224221352
-0.9639886537797576	1109.5208336710964
-0.965909752070642	1111.9241058038506
-0.9678318539508739	1114.3310439691331
-0.9697549591212962	1116.7416515175212
-0.9716790672829874	1119.1559318006575
-0.9736041781372597	1121.573888171242
[truncated: 8,000 more rows]
