# Supplementary material for: Critical Phenomena of Charged AdS Black Holes in Rastall Gravity
Source: Hindawi journal article supplement (doi:10.1155/2020/4065254), 2020-01-24
Supplement: f1 [file 4065254.f1.zip › Fig5(c)-PT.dat]

Graphics[{{}, {{{}, {}, {Hue[0.67, 0.6, 0.6], Directive[PointSize[7/360], AbsoluteThickness[1.6], RGBColor[1, 0, 0]], Line[{{0.2329496328528874, 0.5794936514281191}, {0.23057, 0.57}, {0.22797, 0.56}, {0.225275, 0.55}, {0.222473, 0.54}, {0.219553, 0.53}, {0.2165024, 0.52}, {0.213306, 0.51}, {0.209944, 0.5}, {0.206391, 0.49}, {0.20261, 0.48}, {0.194101, 0.46}, {0.17836220517094503, 0.4367757657880126}}]}}}, {}, {}, {}, {}}, {DisplayFunction -> Identity, PlotRangePadding -> {{0, 0}, {0, 0}}, AxesOrigin -> {0.17040000000000002, 0.401}, PlotRange -> {{0.17, 0.25}, {0.4, 0.6}}, PlotRangeClipping -> True, ImagePadding -> All, DisplayFunction -> Identity, AspectRatio -> GoldenRatio^(-1), Axes -> {True, True}, AxesLabel -> {T, P}, AxesOrigin -> {0.17040000000000002, 0.401}, DisplayFunction :> Identity, Frame -> {{False, False}, {False, False}}, FrameLabel -> {{None, None}, {None, None}}, FrameTicks -> {{Automatic, Automatic}, {Automatic, Automatic}}, GridLines -> {None, None}, GridLinesStyle -> Directive[GrayLevel[0.5, 0.4]], Method -> {"CoordinatesToolOptions" -> {"DisplayFunction" -> ({(Identity[#1] & )[#1[[1]]], (Identity[#1] & )[#1[[2]]]} & ), "CopiedValueFunction" -> ({(Identity[#1] & )[#1[[1]]], (Identity[#1] & )[#1[[2]]]} & )}}, PlotRange -> {{0.17, 0.25}, {0.4, 0.6}}, PlotRangeClipping -> True, PlotRangePadding -> {{0, 0}, {0, 0}}, Ticks -> {Automatic, Automatic}}]
